# Supplementary material
Source: PubMed Central journal article supplement (PMC7707624)
Supplement: ja0c09974_si_002.pdf [file ja0c09974_si_002.pdf]

# Supplementary Information

## **Nucleophilic Dearomatisation of N-Heteroaromatics Enabled by Lewis Acids and Copper Catalysis**

Xingchen Yan,<sup>§</sup> Luo Ge,<sup>§</sup> Marta Castiñeira Reis and Syuzanna R. Harutyunyan\*

Stratingh Institute for Chemistry, University of Groningen, Nijenborgh 4, 9747 AG, Groningen, The Netherlands.

<sup>§</sup>These authors contributed equally: Xingchen Yan, Luo Ge.

Correspondence and requests for materials should be addressed to S.R.H. (e-mail: s.harutyunyan@rug.nl)

## Table of contents

1. General experimental information
2. Chemicals
3. Computational details
4. Optimization of reaction conditions
5. Solvation studies for the computational mechanistic study
6. Lewis acid promoted copper-catalyzed enantioselective dearomatization of quinolines
7. Determination of absolute configuration
8. X-ray crystallographic analysis
9. Mechanistic studies
10. NMR spectra
11. HPLC and UV spectra
12. Cartesian coordinates
13. References

## 1. General experimental information

All reactions using oxygen- and/or moisture-sensitive materials were carried out with anhydrous solvents under a nitrogen atmosphere using standard Schlenk techniques. Flash column chromatography was performed using Merck 60 Å 230–400 mesh silica gel. Thin layer chromatography was performed using 0.25 mm E. Merck silica plates (60F-254). The products were visualized by phosphomolybdic acid (PMA) and  $\text{KMnO}_4$  staining. NMR data was collected on Varian VXR400 ( $^1\text{H}$  at 400 MHz;  $^{13}\text{C}$  at 100.58 MHz) equipped with a 5 mm  $z$ -gradient broadband probe. Chemical shifts are reported in parts per million (ppm) relative to residual solvent peak ( $\text{CDCl}_3$ ,  $^1\text{H}$ : 7.26 ppm;  $^{13}\text{C}$ : 77.16 ppm). Coupling constants are reported in Hertz. Multiplicity is reported with the usual abbreviations (s: singlet, bs: broad singlet, d: doublet, t: triplet, m: multiplet). Variable-temperature NMR spectra were acquired on a Bruker Advance III spectrometer paired with an Ascend 400 MHz magnet and BBFO dual-resonance probe. All temperatures were calibrated prior to acquisition with an external pure MeOH reference.  $^1\text{H}$ - $^{13}\text{C}$  HSQCED spectra were recorded with the  $^1J_{\text{CH}}$  constant set to 145 Hz while the  $^1\text{H}$ - $^{13}\text{C}$  HMBC spectra were recorded with a  $^nJ_{\text{XH}}$  constant set to 8 Hz. Exact mass spectra were recorded on a LTQ Orbitrap XL apparatus with ESI ionization. Enantiomeric excess (*ee*) were determined by chiral HPLC analysis using a Shimadzu LC-10ADVP HPLC equipped with a Shimadzu SPD-M10AVP diode array detector.

## 2. Chemicals

Unless otherwise indicated, reagents and substrates were purchased from commercial sources and used as received. The substrates for synthesis of products **5j** and **5o** were synthesized according to the literature procedures respectively,<sup>1</sup> the rest are commercially available. Dry solvents were freshly collected from a dry solvent purification system prior to use. Inert atmosphere experiments were performed with standard Schlenk techniques with dried ( $\text{P}_2\text{O}_5$ ) nitrogen gas.  $\text{PhPrMgBr}$  (2.6 M in  $\text{Et}_2\text{O}$ ) and  $\text{Hept-6-en-1-ylMgBr}$  (1.4 M in  $\text{Et}_2\text{O}$ ) was prepared from the corresponding alkyl bromides and Mg activated with  $\text{I}_2$  in  $\text{Et}_2\text{O}$ .  $\text{Me}_3\text{SiCH}_2\text{CH}_2\text{MgBr}$  (0.4 M in 2-Me-THF) was prepared from the corresponding alkyl bromide and Mg in 2-Me-THF at 0 °C. Other Grignard reagents were purchased from Sigma-Aldrich:  $\text{EtMgBr}$  (3 M in  $\text{Et}_2\text{O}$ );  $\text{PentMgBr}$ ,  $i\text{BuMgBr}$ ,  $i\text{PentMgBr}$  (2 M in  $\text{Et}_2\text{O}$ );  $i\text{PrMgBr}$  (3 M in 2-Me-THF). The Grignard reagents were titrated by  $^1\text{H}$  NMR before use. Chiral ligands (**L1–L4**) were purchased from Sigma-Aldrich and Strem Chemicals. All reported compounds were characterized by  $^1\text{H}$  and  $^{13}\text{C}$  NMR and compared with literature data. All new compounds were fully characterized by  $^1\text{H}$  and  $^{13}\text{C}$  NMR and HRMS techniques.

### 3. Computational details

We have used the Density Functional Theory (DFT) in the Kohn-Sham formulation<sup>2</sup> to optimize all the stationary points presented in this manuscript. Geometries of all the stationary points were fully optimized at the M06<sup>3</sup>/def2svp<sup>4</sup> computational level. The effect of solvent was modeled using the polarizable continuum model (PCM)<sup>5</sup> with the default parameters implemented in the Gaussian 09 package.<sup>6</sup> All geometry optimizations have been optimized using tight convergence criteria in the SCF and requesting a pruned (99.590) grid to guarantee the accuracy of the reported results. Moreover, the calculations were performed considering 1 atm and 195 K to properly simulate the reaction conditions.

Harmonic analysis was used to establish the nature of all optimized structures as either minima or transition structures. For all stationary points, the stability of the wave function was also confirmed.<sup>7</sup> Moreover, for all the copper species an analysis of the spin annihilation was also performed being the value 0.00.

IRC<sup>8</sup> calculations were conducted for important transition states to ensure their connectivity with the expected reactants and products. The stability of the wave function was analyzed for all the presented stationary points.<sup>9</sup> When the substrates showed conformational freedom, conformational analysis was performed manually, it must be indicated that only the most stable conformer of each stationary point was considered and reported unless otherwise indicated.

The visualization of the reported structures was performed using MOLDEN.<sup>10</sup> The representation of the structures here presented were generated using CYLView.<sup>11</sup>

The Grignard reagents used in this work are bought in ethereal solvents and then diluted. In line with this, we have confirmed the superior stability of the Grignard reagents with two solvent molecules (see Solvation studies).<sup>12</sup> Since solvent can be exchanged during the reaction process, we have evaluated the relative stability of each of the proposed stationary points here described with none, one and two solvent molecules directly coordinated to the magnesium center, for each step of the reaction, obtaining that the coordination two ethereal molecules (at  $-78$  °C) lead to the more stable systems. Thus, along the mechanistic study two solvent molecules are considered in the first coordination sphere of the magnesium.

Moreover, the  $\text{BF}_3$  was selected as the LA and **L1** as a ligand for the molecular simulations.

## 4. Optimization of reaction conditions

**Table S1.** Optimization of the copper salt and LA for the enantioselective C-4-addition of EtMgBr to quinoline followed by trapping with acetyl chloride<sup>a</sup>

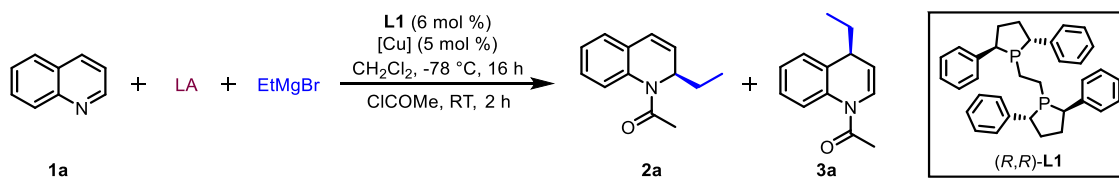

| Entry          | L         | Cu(I)                 | LA                                 | 1a:2a:3a <sup>b</sup> | NMR yield (3a) [%] <sup>c</sup> | ee (3a) [%] <sup>d</sup> |
|----------------|-----------|-----------------------|------------------------------------|-----------------------|---------------------------------|--------------------------|
| 1 <sup>e</sup> | –         | –                     | –                                  | 100:0:0               | –                               | –                        |
| 2              | –         | –                     | Me <sub>3</sub> SiOTf              | 1:93:6                | –                               | –                        |
| 3 <sup>f</sup> | –         | –                     | BF <sub>3</sub> ·Et <sub>2</sub> O | 80:14:6               | –                               | –                        |
| 4              | <b>L1</b> | CuBr·SMe <sub>2</sub> | –                                  | 100:0:0               | –                               | –                        |
| 5              | <b>L1</b> | CuBr·SMe <sub>2</sub> | Me <sub>3</sub> SiOTf              | 3:79:18               | –                               | 77                       |
| 6 <sup>f</sup> | <b>L1</b> | CuBr·SMe <sub>2</sub> | BF <sub>3</sub> ·Et <sub>2</sub> O | 1:0:99                | 55                              | >99                      |
| 7              | <b>L1</b> | CuTc                  | Me <sub>3</sub> SiOTf              | 0:67:33               | –                               | 83                       |
| 8 <sup>f</sup> | <b>L1</b> | CuTc                  | BF <sub>3</sub> ·Et <sub>2</sub> O | 1:0:99                | 58 <sup>g</sup>                 | >99                      |
| 9 <sup>f</sup> | <b>L1</b> | CuTc                  | BCl <sub>3</sub>                   | 24:0:76               | 35                              | 96                       |

<sup>a</sup>Reaction conditions: 0.1 M of **1a** in CH<sub>2</sub>Cl<sub>2</sub>, Cu(I) (5 mol%), **L1** (6 mol%), LA (2 equiv.), EtMgBr (2 equiv.) at –78 °C for 16 h, then ClCOMe (5 equiv.) at RT for 2 h. <sup>b</sup>The ratio was determined by <sup>1</sup>H NMR of reaction crude. <sup>c</sup>Trimethoxybenzene was added after work-up and used as the internal standard. <sup>d</sup>Enantiomeric excess was determined by HPLC on a chiral stationary phase. <sup>e</sup>In this case the reaction was quenched directly without trapping with ClCOMe. <sup>f</sup>In this case THF (4 mL) was added after addition of ClCOMe. <sup>g</sup>In this case the data reported corresponds to the isolated yield.

**Table S2.** Optimization of the of LA and EtMgBr quantities as well as the nature of solvent for the enantioselective C-4-addition of EtMgBr to quinoline followed by trapping with acetyl chloride<sup>a</sup>

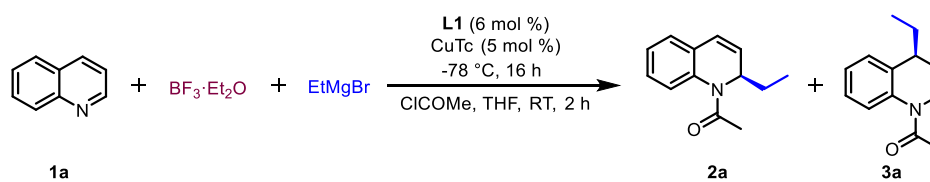

| Entry           | Solvent                         | BF <sub>3</sub> ·Et <sub>2</sub> O [equiv.] | EtMgBr [equiv.] | 1a:2a:3a <sup>b</sup> | NMR yield (3a) [%] <sup>c</sup> | ee (3a) [%] <sup>d</sup> |
|-----------------|---------------------------------|---------------------------------------------|-----------------|-----------------------|---------------------------------|--------------------------|
| 1               | CH <sub>2</sub> Cl <sub>2</sub> | 2                                           | 2               | 1:0:99                | 58 <sup>e</sup>                 | >99                      |
| 2               | CH <sub>2</sub> Cl <sub>2</sub> | 1.2                                         | 2               | 1:0:99                | 54                              | >99                      |
| 3               | CH <sub>2</sub> Cl <sub>2</sub> | 0.4                                         | 2               | 35:0:65               | 47                              | 98                       |
| 4               | CH <sub>2</sub> Cl <sub>2</sub> | 2                                           | 1.2             | 34:0:66               | 41                              | >99                      |
| 5               | CH <sub>2</sub> Cl <sub>2</sub> | 1.2                                         | 1.2             | 35:0:65               | 39                              | >99                      |
| 6 <sup>f</sup>  | CH <sub>2</sub> Cl <sub>2</sub> | 2                                           | 2               | 1:0:99                | 57                              | >99                      |
| 7 <sup>g</sup>  | CH <sub>2</sub> Cl <sub>2</sub> | 2                                           | 2               | 4:0:96                | 54                              | >99                      |
| 8 <sup>h</sup>  | CH <sub>2</sub> Cl <sub>2</sub> | 2                                           | 2               | 5:0:95                | 51                              | >99                      |
| 9 <sup>i</sup>  | THF                             | 2                                           | 2               | 12:81:7               | –                               | 42                       |
| 10 <sup>i</sup> | 2-Me-THF                        | 2                                           | 2               | 1:0:99                | 34                              | >99                      |
| 11              | MTBE                            | 2                                           | 2               | 30:0:70               | –                               | >99                      |
| 12              | MTBE                            | 3                                           | 3               | 2:0:98                | 52                              | >99                      |
| 13              | Et <sub>2</sub> O               | 3                                           | 3               | 2:0:98                | 41                              | >99                      |
| 14              | Toluene                         | 3                                           | 3               | 1:0:99                | 44                              | >99                      |

<sup>a</sup>Reaction conditions: 0.1 M of **1a**, CuTc (5 mol%), **L1** (6 mol%), BF<sub>3</sub>·Et<sub>2</sub>O, EtMgBr at –78 °C for 16 h, then CICOMe (5 equiv.) and THF (4 mL) at RT for 2 h. <sup>b</sup>The ratio was determined by <sup>1</sup>H NMR of reaction crude. <sup>c</sup>Trimethoxybenzene was added after work-up and used as the internal standard. <sup>d</sup>Enantiomeric excess was determined by HPLC on a chiral stationary phase. <sup>e</sup>In this case the isolated yield is reported. <sup>f</sup>EtMgBr was diluted to 1 mL with MTBE and added with syringe pump in 1 h. <sup>g</sup>EtMgBr was first added followed by addition of BF<sub>3</sub>·Et<sub>2</sub>O. <sup>h</sup>The mixture of chiral catalyst **L1**/Cu(I) and EtMgBr was added to the mixture of substrate and BF<sub>3</sub>·Et<sub>2</sub>O. <sup>i</sup>In this case THF (4 mL) was not needed after addition of CICOMe.

**Table S3.** Optimization of the reductant for the enantioselective C-4-addition of EtMgBr to quinoline followed by reduction<sup>a</sup>

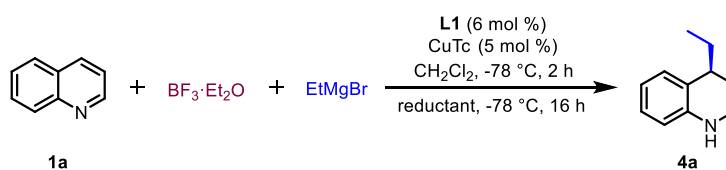

| Entry          | Reductant                                                             | Conversion [%] <sup>b</sup> | Isolated yield [%] | ee [%] <sup>c</sup> |
|----------------|-----------------------------------------------------------------------|-----------------------------|--------------------|---------------------|
| 1              | $\text{NaBH}_4$                                                       | 99                          | 73                 | >99                 |
| 2              | $\text{NaBH}_4$ (1 mmol)/THF (4 mL) mixture                           | 99                          | 49                 | >99                 |
| 3              | $\text{NaBH}_4$ (1 mmol)/MeOH (2 mL) mixture                          | 99                          | 33                 | >99                 |
| 4              | $\text{BH}_3 \cdot \text{SMe}_2$                                      | 99                          | 49                 | >99                 |
| 5 <sup>d</sup> | $\text{Et}_3\text{SiH}$ (1 mmol), $\text{CF}_3\text{COOH}$ (1.2 mmol) | 99                          | 49 <sup>e</sup>    | >99                 |
| 6              | $\text{BH}_3$ (1 M in THF)                                            | 99                          | 83                 | >99                 |

<sup>a</sup>Reaction conditions: 0.2 mmol of **1a** in  $\text{CH}_2\text{Cl}_2$  (2 mL), CuTc (5 mol%), **L1** (6 mol%),  $\text{BF}_3 \cdot \text{Et}_2\text{O}$  (2 equiv.), EtMgBr (2 equiv.) at  $-78\text{ }^\circ\text{C}$  for 2 h, then reductant (5 equiv.) at RT for 16 h. <sup>b</sup>Conversion was determined by  $^1\text{H}$  NMR of reaction crude. <sup>c</sup>Enantiomeric excess was determined by HPLC on a chiral stationary phase. <sup>d</sup>During work-up, the solvent was evaporated before saturated  $\text{NaHCO}_3$  aqueous solution was added to the residue and the mixture was extracted with  $\text{CH}_2\text{Cl}_2$ . <sup>e</sup>Product is not pure.

## 5. Solvation studies for the computational mechanistic study

**Table S4.** Computed relative energies for the solvation of the EtMgBr species. Calculations were performed at the PCM( $\text{CH}_2\text{Cl}_2$ )/M06/def2svp computational level using the Gaussian 09 program. The thermochemistry was obtained at 1 atm and 195 K.

| ID                             | $\Delta G^a$ |
|--------------------------------|--------------|
| <b>EtMgBr</b>                  | 0.00         |
| <b>EtMgBr·Et<sub>2</sub>O</b>  | -7.70        |
| <b>EtMgBr·2Et<sub>2</sub>O</b> | -8.84        |

<sup>a</sup>Energies are calculated with respect to EtMgBr and two molecules of  $\text{Et}_2\text{O}$  and are expressed in kcal/mol.

**Table S5.** Summary of the energies for solvation studies of the Grignard reagent.

| ID                             | ImFreqs | Stable | SCF <sup>a</sup> | SCF+ZPVE     | H <sup>b</sup> | G <sup>c</sup> |
|--------------------------------|---------|--------|------------------|--------------|----------------|----------------|
| <b>EtMgBr</b>                  | –       | Yes    | –2852.92586678   | –2852.862580 | –2852.858414   | –2852.881361   |
| <b>Et<sub>2</sub>O</b>         | –       | Yes    | –233.296065097   | –233.161050  | –233.156875    | –233.179034    |
| <b>EtMgBr·Et<sub>2</sub>O</b>  | –       | Yes    | –3086.24895436   | –3086.048164 | –3086.040115   | –3086.072676   |
| <b>EtMgBr·2Et<sub>2</sub>O</b> | –       | Yes    | –3319.207607     | –3319.19668  | –3319.195446   | –3319.252401   |

<sup>a</sup>Energies are expressed in a.u. and the imaginary frequencies in cm<sup>-1</sup>. <sup>b</sup>H represents enthalpies. <sup>c</sup>G Represents Gibbs free Energies.

## 6. Lewis acid promoted copper-catalyzed enantioselective dearomatization of quinolines

### General procedure for catalytic reactions

In a flame-dried Schlenk tube equipped with septum and magnetic stirring bar, the substrate (0.2 mmol, 1 equiv.), copper salt (0.01 mmol, 5 mol%), and ligand **L** (0.012 mmol, 6 mol%) were dissolved in the solvent (2 mL) and stirred under nitrogen atmosphere for 20 min. at RT. The mixture was cooled to –78 °C and LA (1.2–3 equiv.) was added. After 20 min., RMgBr (2–3 equiv.) was added dropwise in about 1 min.

### General trapping procedure

After stirring for 16 h at –78 °C, acetyl chloride (71 μL, 1 mmol, 5 equiv.) was added and the reaction mixture was warmed up to RT. After stirring for 2 h, the resulting reaction mixture was quenched with saturated NaHCO<sub>3</sub> aqueous solution (2 mL) and stirred at RT for 1 h to hydrolyze the remaining acetyl chloride. The mixture was extracted with CH<sub>2</sub>Cl<sub>2</sub> (10 mL × 3). The combined organic phase was dried over MgSO<sub>4</sub>, filtered and evaporated on rotary evaporator. The crude was purified by flash chromatography on the silica gel. (Note: when BF<sub>3</sub>·Et<sub>2</sub>O was used as LA, 4 mL of THF has to be added after addition of acetyl chloride, because when using BF<sub>3</sub>·Et<sub>2</sub>O trapping was only successful in THF.)

### General reduction procedure

After stirring for 2–16 h at –78 °C, BH<sub>3</sub> (1 M in THF, 1 mmol, 5 equiv.) was added. After stirring for 16 h at –78 °C, the resulting reaction mixture was quenched with saturated NaHCO<sub>3</sub> aqueous solution (2 mL) and warmed up to RT. The mixture was stirred at RT for 1 h to hydrolyze the remaining BH<sub>3</sub>·THF, and extracted with CH<sub>2</sub>Cl<sub>2</sub> (10 mL × 3). The combined organic phase was dried over



MgSO<sub>4</sub>, filtered and evaporated on rotary evaporator. The crude was purified by flash chromatography on the silica gel.

### Procedure for the reaction with the reduced catalyst loading

In a flame-dried three-neck round-bottom flask equipped with septum and mechanistic stirring bar, CuTc (0.01 mmol) and ligand (*R,R*)-**L1** (0.012 mmol) were dissolved in CH<sub>2</sub>Cl<sub>2</sub> (10 mL) and the mixture was stirred under nitrogen atmosphere for 20 min. at RT, forming catalyst solution **1**. 2 mL of catalyst solution **1** (2 μmol, 1 mol%) was transferred to substrate **1a** (0.2 mmol, 1 equiv.) to perform the reaction with 1 mol% catalyst. 0.2 mL of catalyst solution **1** (0.2 μmol, 0.1 mol%) was transferred to substrate **1a** (0.2 mmol, 1 equiv.) dissolved in CH<sub>2</sub>Cl<sub>2</sub> (2 mL) to perform the reaction with 0.1 mol% catalyst. 1 mL of catalyst solution **1** (1 μmol) was transferred to another round-bottom flask and diluted with CH<sub>2</sub>Cl<sub>2</sub> to 10 mL to form catalyst solution **2**. 0.2 mL of catalyst solution **2** (0.02 μmol, 0.01 mol%) was transferred to substrate **1a** (0.2 mmol, 1 equiv.) dissolved in CH<sub>2</sub>Cl<sub>2</sub> (2 mL) to perform the reaction with 0.01 mol% catalyst.

### Procedure for the preparative scale (10 mmol) reaction

In a flame-dried three-neck round-bottom flask equipped with septum and mechanistic stirring bar, the substrate **1a** (10 mmol, 1 equiv.), CuTc (0.01 mmol, 0.1 mol%) and ligand (*R,R*)-**L1** (0.012 mmol, 0.12 mol%) were dissolved in CH<sub>2</sub>Cl<sub>2</sub> (50 mL) and the mixture was stirred under nitrogen atmosphere for 20 min. at RT. The mixture was cooled to -78 °C and BF<sub>3</sub>·Et<sub>2</sub>O (20 mmol, 2 equiv.) was added. After 20 min., EtMgBr (3 M in Et<sub>2</sub>O, 20 mmol, 2 equiv.) was added with syringe pump in 15 min. After stirring for 2 h at -78 °C, BH<sub>3</sub> (1 M in THF, 50 mmol, 5 equiv.) was added. After stirring for 16 h at -78 °C, the resulting reaction mixture was quenched with saturated NaHCO<sub>3</sub> aqueous solution (20 mL) and warmed up to RT. The mixture was stirred at RT for 1 h to hydrolyze the BH<sub>3</sub>·THF, and extracted with CH<sub>2</sub>Cl<sub>2</sub> (30 mL × 3). The combined organic phase was dried over MgSO<sub>4</sub>, filtered and evaporated on rotary evaporator. The crude was purified by flash chromatography on the silica gel (SiO<sub>2</sub>, pentane:Et<sub>2</sub>O = 20:1) to yield the product **4a** as a colorless oil [71% yield, 96% *ee*].

### Procedure for the synthesis of racemic **2a** and **3a**

In a flame-dried Schlenk tube equipped with septum and magnetic stirring bar, **1a** (0.2 mmol, 1 equiv.) was dissolved in CH<sub>2</sub>Cl<sub>2</sub> (2 mL). The temperature was cooled down to -78 °C and EtMgBr (3 M in Et<sub>2</sub>O, 0.4 mmol, 2 equiv.) was added. After stirring for 16 h, acetyl chloride (1 mmol, 5 equiv.) was added and the reaction mixture was warmed up to RT. After stirring for 2 h, the resulting reaction mixture was quenched with saturated NaHCO<sub>3</sub> aqueous solution (2 mL) and stirred at RT for 1 h to

hydrolyze the remaining acetyl chloride. The mixture was extracted with CH<sub>2</sub>Cl<sub>2</sub> (10 mL × 3). The combined organic phase was dried over MgSO<sub>4</sub>, filtered and evaporated on rotary evaporator. Products **2a** and **3a** were obtained as a colorless oil after column chromatography (SiO<sub>2</sub>, pentane:Et<sub>2</sub>O = 10:1) [**1a**:**2a**:**3a** = 37:53:10 in the crude product].

### General procedure for the synthesis of racemic 4-substituted 1,2,3,4-tetrahydroquinolines

In a flame-dried Schlenk tube equipped with septum and magnetic stirring bar, the substrate (0.2 mmol, 1 equiv.), CuTc (0.01 mmol, 5 mol%) and CH<sub>2</sub>Cl<sub>2</sub> (2 mL) were stirred under nitrogen atmosphere for 20 min. at RT. The mixture was cooled to -78 °C and BF<sub>3</sub>·Et<sub>2</sub>O (0.6 mmol, 3 equiv.) was added. After 20 min., RMgBr (0.6 mmol, 3 equiv.) was added dropwise in about 1 min. After stirring for 16 h at -78 °C, NaBH<sub>4</sub> (1 mmol, 5 equiv.) was added and the reaction mixture was warmed up to RT. After stirring for 2 h, the resulting reaction mixture was quenched with saturated NaHCO<sub>3</sub> aqueous solution (2 mL) and stirred at RT for 1 h to hydrolyze the remaining NaBH<sub>4</sub>. The mixture was extracted with CH<sub>2</sub>Cl<sub>2</sub> (10 mL × 3). The combined organic phase was dried over MgSO<sub>4</sub>, filtered and evaporated on rotary evaporator. The crude was purified by flash chromatography on the silica gel.

### Specific experimental details and product characterization

#### 1-acetyl-2-ethyl-1,2-dihydroquinoline (**2a**)

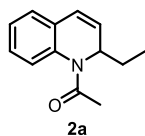

<sup>1</sup>H NMR (CDCl<sub>3</sub>, 400 MHz): δ 7.21-6.98 (m, 4H, CH<sub>Ar</sub>), 6.43 (d, *J* = 9.5 Hz, 1H, CHCH=CH), 6.11 (dd, *J* = 9.6, 5.8 Hz, 1H, CHCH=), 5.38-5.17 (m, 1H, CH=CHCH), 2.18 (s, 3H, COCH<sub>3</sub>), 1.51-1.37 (m, 1H, CH<sub>3</sub>CHH), 1.37-1.21 (m, 1H, CH<sub>3</sub>CHH), 0.83 (t, *J* = 7.4 Hz, 3H, CH<sub>2</sub>CH<sub>3</sub>).

<sup>13</sup>C NMR (CDCl<sub>3</sub>, 100 MHz): δ 170.2, 135.3, 132.5, 128.6, 127.0, 126.3, 125.4, 124.8, 124.3, 51.7, 25.3, 22.8, 9.9.

HRMS (ESI, *m/z*): calcd. for C<sub>13</sub>H<sub>16</sub>NO [M+H]<sup>+</sup>: 202.1226, found: 202.1225.

HPLC: Chiracel-ODH, *n*-heptane/*i*-PrOH 95:5, 0.5 mL/min., 40 °C, detection at 234 nm. Retention time (min): 13.6 and 16.2.

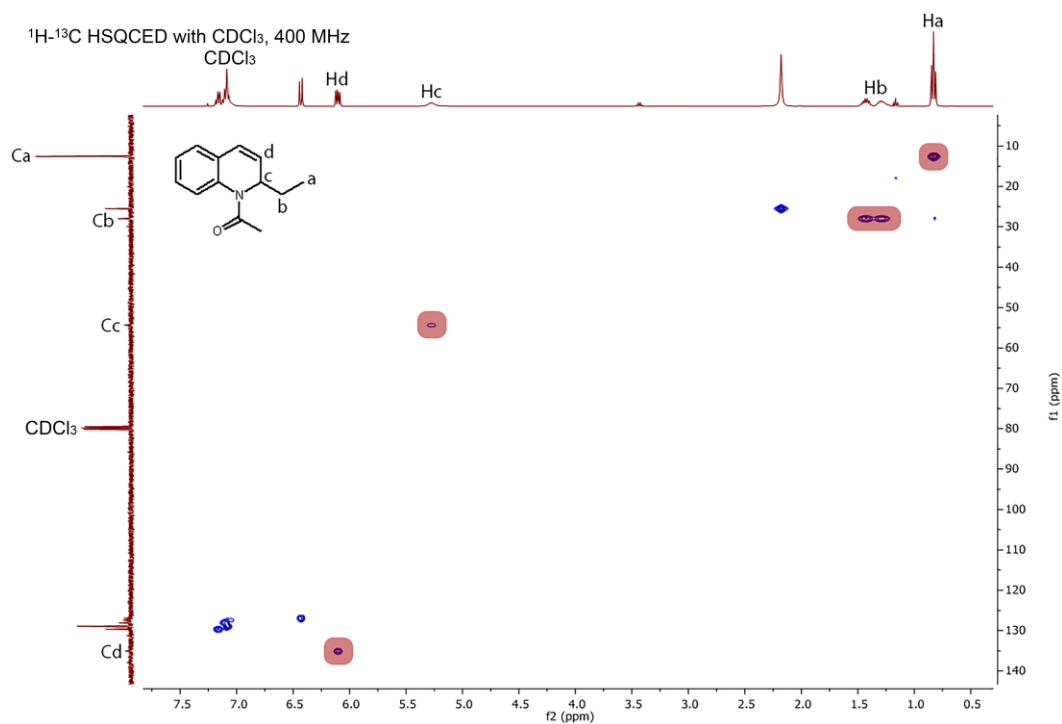

**Figure S1.** <sup>1</sup>H-<sup>13</sup>C-HSQCED spectrum of product **2a**.

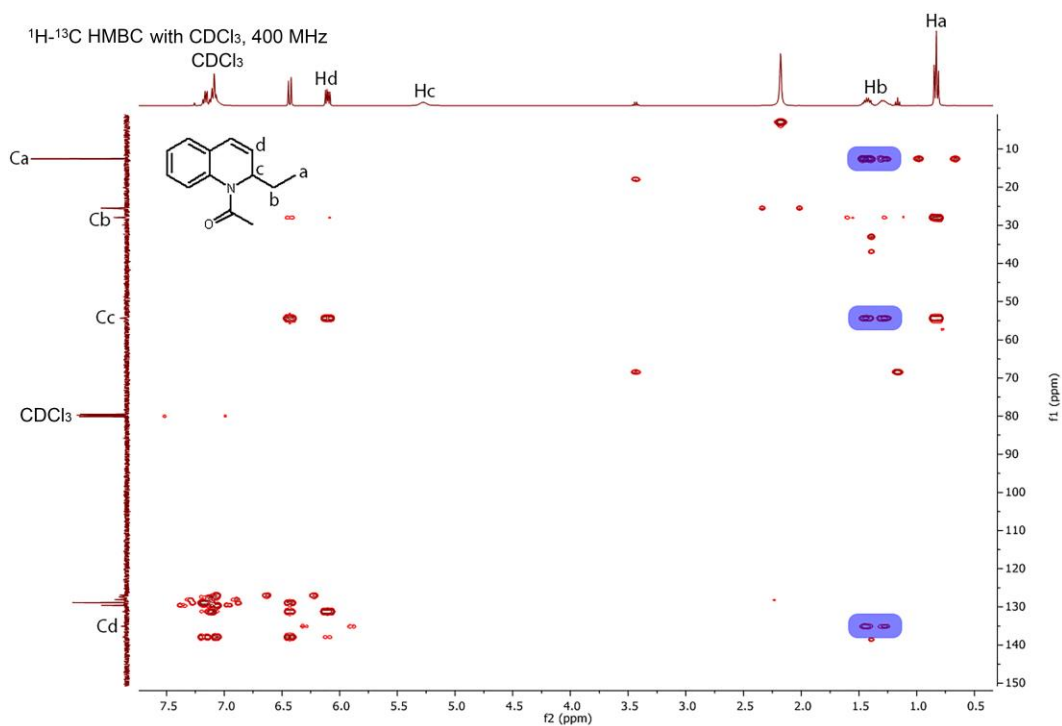

**Figure S2.** <sup>1</sup>H-<sup>13</sup>C-HMBC spectrum of product **2a**. Correlations of Hb with Ca, Cc and Cd are highlighted. No correlation of Hb with any aromatic carbon was observed, proving that product **2a** is the C-2-addition product.

**(S)-1-acetyl-4-ethyl-1,4-dihydroquinoline (3a)**

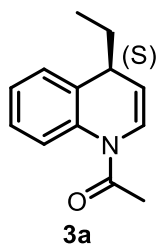

The reaction was performed with **1a** (24  $\mu$ L, 0.2 mmol, 1 equiv.), CuTc (0.01 mmol, 5 mol%), ligand (*R,R*)-**L1** (0.012 mmol, 6 mol%),  $\text{BF}_3 \cdot \text{Et}_2\text{O}$  (0.4 mmol, 2 equiv.), EtMgBr (3 M in  $\text{Et}_2\text{O}$ , 0.4 mmol, 2 equiv.),  $\text{CH}_2\text{Cl}_2$  (2.0 mL) at  $-78^\circ\text{C}$  for 16 h, and following **General trapping procedure**. Product **3a** was obtained as a colorless oil after column chromatography ( $\text{SiO}_2$ , pentane: $\text{Et}_2\text{O}$  = 10:1) [99% conversion, 58% yield, >99% *ee*].

$^1\text{H}$  NMR ( $\text{CDCl}_3$ , 400 MHz):  $\delta$  7.85 (d,  $J$  = 9.3 Hz, 1H,  $\text{CH}_{\text{Ar}}$ ), 7.27-7.19 (m, 1H,  $\text{CH}_{\text{Ar}}$ ), 7.19-7.08 (m, 2H,  $\text{CH}_{\text{Ar}}$ ), 6.89 (d,  $J$  = 7.5 Hz, 1H,  $\text{NCH=}$ ), 5.52 (dd,  $J$  = 7.5, 5.9 Hz, 1H,  $\text{NCH=CH}$ ), 3.30-3.23 (m, 1H,  $\text{CH=CHCH}$ ), 2.36 (s, 3H,  $\text{COCH}_3$ ), 1.69-1.51 (m, 2H,  $\text{CH}_3\text{CH}_2$ ), 0.88 (t,  $J$  = 7.4 Hz, 3H,  $\text{CH}_2\text{CH}_3$ ).

$^{13}\text{C}$  NMR ( $\text{CDCl}_3$ , 100 MHz):  $\delta$  168.4, 136.8, 133.1, 128.3, 127.0, 126.0, 125.4, 123.0, 116.6, 39.9, 30.3, 24.2, 10.8.

HRMS (ESI,  $m/z$ ): calcd. for  $\text{C}_{13}\text{H}_{16}\text{NO}$  [ $\text{M}+\text{H}$ ] $^+$ : 202.1226, found: 202.1224.

HPLC: Chiracel-ASH, *n*-heptane/*i*-PrOH 95:5, 0.5 mL/min.,  $40^\circ\text{C}$ , detection at 251 nm. Retention time (min): 11.1 (major) and 12.4 (minor).

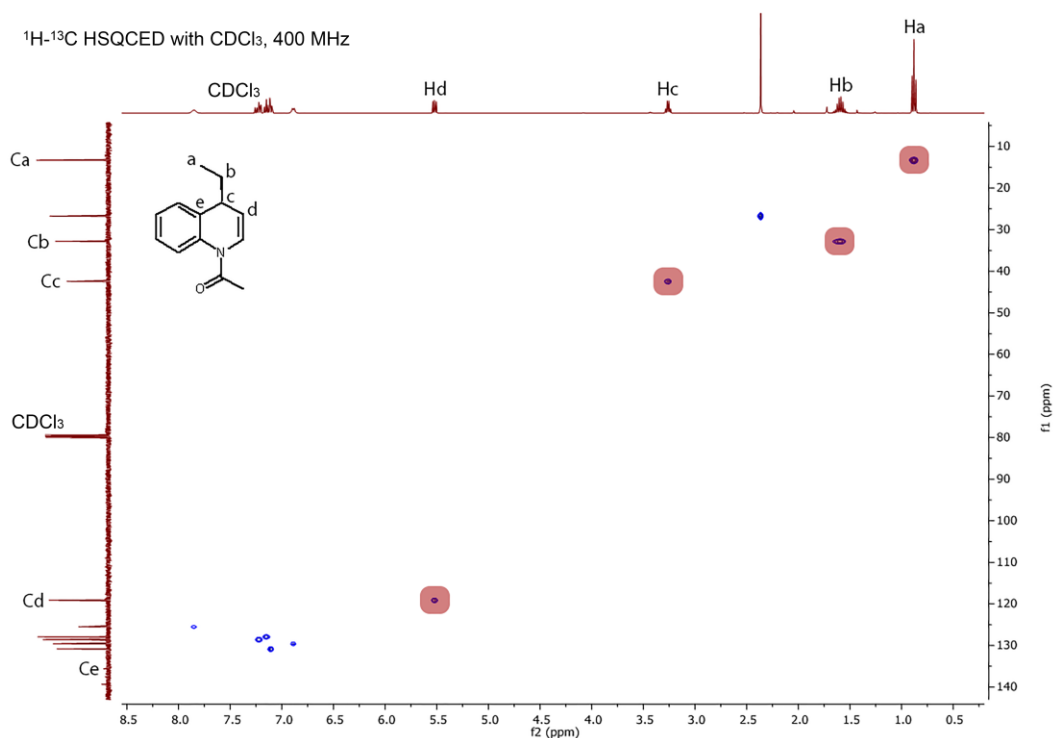

**Figure S3.**  $^1\text{H}$ - $^{13}\text{C}$ -HSQCED spectrum of product **3a**.

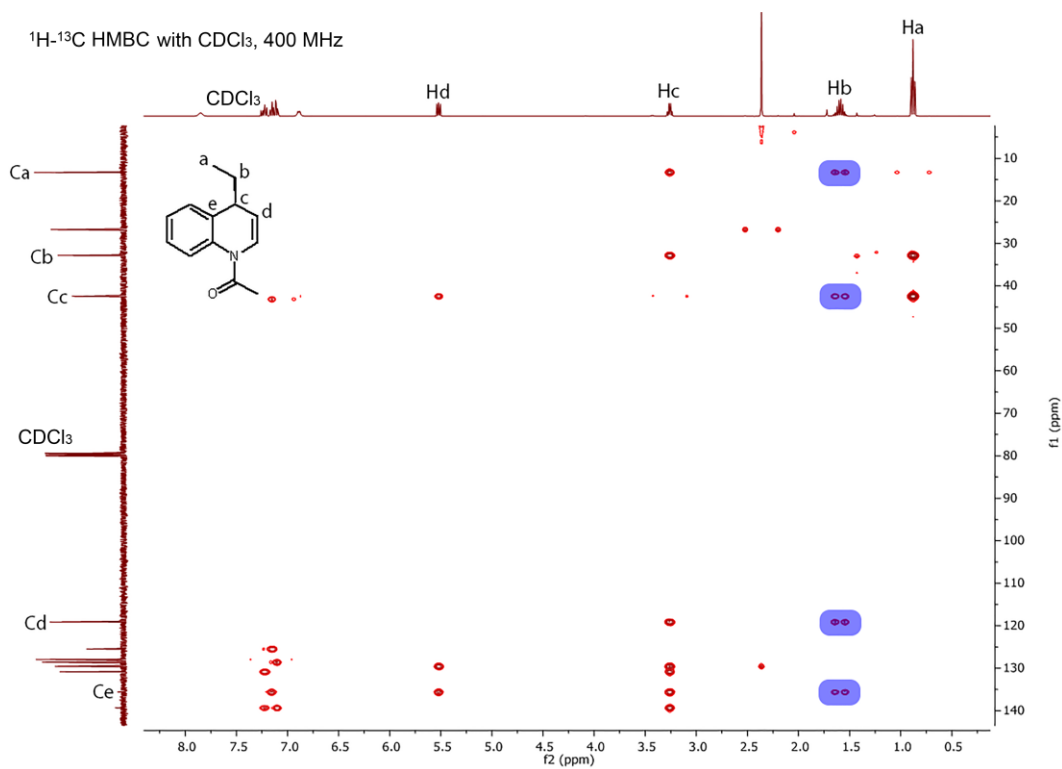

**Figure S4.**  $^1\text{H}$ - $^{13}\text{C}$ -HMBC spectrum of product **3a**. Correlations of Hb with Ca, Cc, Cd and Ce are highlighted. Hb correlates not only with Ca, Cc and Cd but also with the aromatic Ce, proving that product **3a** is the C-4-addition product.

**(S)-4-Ethyl-1,2,3,4-tetrahydroquinoline (4a)**<sup>13</sup>

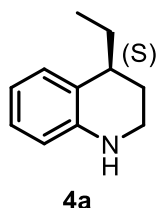

The reaction was performed with **1a** (0.2 mmol, 1 equiv.), CuTc (0.01 mmol, 5 mol%), ligand (*R,R*)-**L1** (0.012 mmol, 6 mol%), BF<sub>3</sub>·Et<sub>2</sub>O (0.4 mmol, 2 equiv.), EtMgBr (3 M in Et<sub>2</sub>O, 0.4 mmol, 2 equiv.), CH<sub>2</sub>Cl<sub>2</sub> (2.0 mL) at -78 °C for 2 h, and following **General reducing procedure**. Product **4a** was obtained as a colorless oil after column chromatography (SiO<sub>2</sub>, pentane:Et<sub>2</sub>O = 20:1) [99% conversion, 83% yield, >99% *ee*].

<sup>1</sup>H NMR (CDCl<sub>3</sub>, 400 MHz): δ 7.07-7.03 (m, 1H, CH<sub>Ar</sub>), 7.02-6.96 (m, 1H, CH<sub>Ar</sub>), 6.68-6.61 (m, 1H, CH<sub>Ar</sub>), 6.49 (dd, *J* = 8.0, 1.2 Hz, 1H, CH<sub>Ar</sub>), 3.76 (bs, 1H, NH), 3.38-3.23 (m, 2H, NHCH<sub>2</sub>), 2.72-2.63 (m, 1H, CH<sub>3</sub>CH<sub>2</sub>CH), 2.00-1.90 (m, 1H, CH<sub>2</sub>), 1.89-1.71 (m, 2H, CH<sub>2</sub>), 1.63-1.50 (m, 1H, CH<sub>2</sub>), 1.01 (t, *J* = 7.4 Hz, 3H, CH<sub>3</sub>).

<sup>13</sup>C NMR (CDCl<sub>3</sub>, 100 MHz): δ 144.3, 129.3, 126.9, 125.7, 116.8, 114.3, 38.6, 37.3, 29.4, 25.8, 11.8.

HPLC: Chiracel-ADH, *n*-heptane/*i*-PrOH 95:5, 0.5 mL/min., 40 °C, detection at 247 nm. Retention time (min): 11.3 (major) and 12.8 (minor).

**(S)-4-Pentyl-1,2,3,4-tetrahydroquinoline (4b)**

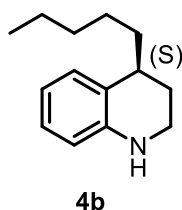

The reaction was performed with **1a** (0.2 mmol, 1 equiv.), CuTc (0.01 mmol, 5 mol%), ligand (*R,R*)-**L1** (0.012 mmol, 6 mol%), BF<sub>3</sub>·Et<sub>2</sub>O (0.4 mmol, 2 equiv.), PentMgBr (2 M in Et<sub>2</sub>O, 0.6 mmol, 3 equiv.), CH<sub>2</sub>Cl<sub>2</sub> (2.0 mL) at -78 °C for 2 h, and following **General reducing procedure**. Product **4b** was obtained as a colorless oil after column chromatography (SiO<sub>2</sub>, pentane:Et<sub>2</sub>O = 30:1) [99% conversion, 96% yield, >99% *ee*].

<sup>1</sup>H NMR (CDCl<sub>3</sub>, 400 MHz): δ 7.06-7.02 (m, 1H, CH<sub>Ar</sub>), 7.01-6.95 (m, 1H, CH<sub>Ar</sub>), 6.67-6.61 (m, 1H, CH<sub>Ar</sub>), 6.49 (dd, *J* = 8.0, 1.2 Hz, 1H, CH<sub>Ar</sub>), 3.82 (bs, 1H, NH), 3.34 (dt, *J* = 10.7, 3.6 Hz, 1H,

NHCHH), 3.26 (dt,  $J = 11.1, 4.7$  Hz, 1H, NHCHH), 2.80-2.71 (m, 1H, NHCH<sub>2</sub>CH<sub>2</sub>CH), 2.00-1.89 (m, 1H, CH<sub>2</sub>), 1.87-1.78 (m, 1H, CH<sub>2</sub>), 1.75-1.64 (m, 1H, CH<sub>2</sub>), 1.60-1.27 (m, 7H, CH<sub>2</sub>), 0.93 (t,  $J = 6.6$  Hz, 3H, CH<sub>3</sub>).

<sup>13</sup>C NMR (CDCl<sub>3</sub>, 100 MHz):  $\delta$  144.3, 129.2, 126.8, 125.9, 116.7, 114.2, 38.6, 36.8, 35.6, 32.2, 26.8, 26.2, 22.8, 14.3.

HRMS (ESI, m/Z): calcd. for C<sub>14</sub>H<sub>22</sub>N [M+H]<sup>+</sup>: 204.1747, found: 204.1746.

HPLC: Chiracel-ADH, *n*-heptane/*i*-PrOH 95:5, 0.5 mL/min., 40 °C, detection at 247 nm. Retention time (min): 10.0 (major) and 11.1 (minor).

#### (*R*)-4-(1-methylethyl)-1,2,3,4-tetrahydroquinoline (**4c**)<sup>14</sup>

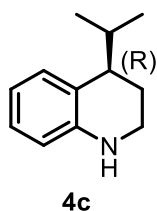

The reaction was performed with **1a** (0.2 mmol, 1 equiv.), CuTc (0.02 mmol, 10 mol%), ligand (*R,R*)-**L1** (0.024 mmol, 12 mol%), BF<sub>3</sub>·Et<sub>2</sub>O (0.4 mmol, 2 equiv.), *i*PrMgBr (3 M in 2-Me-THF, 0.4 mmol, 2 equiv.), CH<sub>2</sub>Cl<sub>2</sub> (2.0 mL) at -78 °C for 16 h, and following **General reducing procedure**. Product **4c** was obtained as a colorless oil after column chromatography (SiO<sub>2</sub>, pentane:Et<sub>2</sub>O = 30:1) [99% conversion, 82% yield, 80% *ee*].

<sup>1</sup>H NMR (CDCl<sub>3</sub>, 400 MHz):  $\delta$  7.06-6.96 (m, 2H, CH<sub>Ar</sub>), 6.66-6.60 (m, 1H, CH<sub>Ar</sub>), 6.48 (d,  $J = 7.9$  Hz, 1H, CH<sub>Ar</sub>), 3.82 (bs, 1H, NH), 3.40-3.26 (m, 2H, NHCH<sub>2</sub>), 2.60-2.53 (m, 1H, CH<sub>3</sub>CHCH), 2.11-2.00 (m, 1H, CH<sub>3</sub>CH), 2.00-1.90 (m, 1H, NHCH<sub>2</sub>CHH), 1.88-1.77 (m, 1H, NHCH<sub>2</sub>CHH), 1.01 (d,  $J = 6.8$  Hz, 3H, CH<sub>3</sub>), 0.90 (d,  $J = 6.8$  Hz, 3H, CH<sub>3</sub>).

<sup>13</sup>C NMR (CDCl<sub>3</sub>, 100 MHz):  $\delta$  144.7, 129.4, 126.8, 124.5, 116.3, 114.1, 42.3, 39.6, 30.5, 23.0, 21.6, 18.6.

HRMS (ESI, m/Z): calcd. for C<sub>12</sub>H<sub>18</sub>N [M+H]<sup>+</sup>: 176.1434, found: 176.1428.

HPLC: Chiracel-ADH, *n*-heptane/*i*-PrOH 95:5, 0.5 mL/min., 40 °C, detection at 247 nm. Retention time (min): 10.2 (major) and 14.4 (minor).

**(S)-4-(2-methylpropyl)-1,2,3,4-tetrahydroquinoline (4d)**

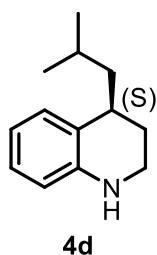

The reaction was performed with **1a** (0.2 mmol, 1 equiv.), CuTc (0.01 mmol, 5 mol%), ligand (*R,R*)-**L1** (0.012 mmol, 6 mol%), BF<sub>3</sub>·Et<sub>2</sub>O (0.4 mmol, 2 equiv.), *i*BuMgBr (2 M in Et<sub>2</sub>O, 0.6 mmol, 3 equiv.), CH<sub>2</sub>Cl<sub>2</sub> (2.0 mL) at -78 °C for 2 h, and following **General reducing procedure**. Product **4d** was obtained as a colorless oil after column chromatography (SiO<sub>2</sub>, pentane:Et<sub>2</sub>O = 30:1) [94% conversion, 72% yield, >99% *ee*].

<sup>1</sup>H NMR (CDCl<sub>3</sub>, 400 MHz): δ 7.05-6.94 (m, 2H, CH<sub>Ar</sub>), 6.66-6.60 (m, 1H, CH<sub>Ar</sub>), 6.49 (dd, *J* = 8.0, 1.2 Hz, 1H, CH<sub>Ar</sub>), 3.85 (bs, 1H, NH), 3.34 (dt, *J* = 10.9, 3.4 Hz, 1H, NHCHH), 3.26 (dt, *J* = 11.2, 4.6 Hz, 1H, NHCHH), 2.89-2.80 (m, 1H, NHCH<sub>2</sub>CH<sub>2</sub>CH), 2.00-1.88 (m, 1H, CH<sub>2</sub>), 1.83-1.71 (m, 2H, CH<sub>2</sub>), 1.55-1.41 (m, 2H, CH<sub>2</sub>, CH<sub>3</sub>CH), 1.02-0.95 (m, 6H, CH<sub>3</sub>).

<sup>13</sup>C NMR (CDCl<sub>3</sub>, 100 MHz): δ 144.3, 129.1, 126.8, 126.2, 116.8, 114.2, 46.5, 38.3, 33.1, 26.1, 24.9, 23.8, 22.1.

HRMS (ESI, *m/z*): calcd. for C<sub>13</sub>H<sub>20</sub>N [M+H]<sup>+</sup>: 190.1590, found: 190.1585.

HPLC: Chiracel-ADH, *n*-heptane/*i*-PrOH 95:5, 0.5 mL/min., 40 °C, detection at 247 nm. Retention time (min): 10.0 (major) and 11.7 (minor).

**(S)-4-(3-methylbutyl)-1,2,3,4-tetrahydroquinoline (4e)**

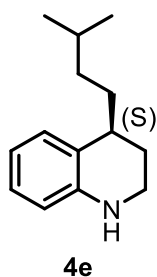

The reaction was performed with **1a** (0.2 mmol, 1 equiv.), CuTc (0.01 mmol, 5 mol%), ligand (*R,R*)-**L1** (0.012 mmol, 6 mol%), BF<sub>3</sub>·Et<sub>2</sub>O (0.4 mmol, 2 equiv.), *i*PentMgBr (2 M in Et<sub>2</sub>O, 0.6 mmol, 3 equiv.), CH<sub>2</sub>Cl<sub>2</sub> (2.0 mL) at -78 °C for 2 h, and following **General reducing procedure**. Product **4e**



was obtained as a colorless oil after column chromatography (SiO<sub>2</sub>, pentane:Et<sub>2</sub>O = 30:1) [99% conversion, 90% yield, >99% *ee*].

<sup>1</sup>H NMR (CDCl<sub>3</sub>, 400 MHz): δ 7.08-7.02 (m, 1H, CH<sub>Ar</sub>), 7.02-6.96 (m, 1H, CH<sub>Ar</sub>), 6.68-6.62 (m, 1H, CH<sub>Ar</sub>), 6.49 (dd, *J* = 8.0, 1.2 Hz, 1H, CH<sub>Ar</sub>), 3.85 (bs, 1H, NH), 3.34 (dt, *J* = 10.4, 5.5 Hz, 1H, NHCHH), 3.27 (td, *J* = 10.9, 4.7 Hz, 1H, NHCHH), 2.78-2.69 (m, 1H, NHCH<sub>2</sub>CH<sub>2</sub>CH), 2.00-1.89 (m, 1H, CH<sub>2</sub>), 1.88-1.79 (m, 1H, CH<sub>2</sub>), 1.77-1.66 (m, 1H, CH<sub>2</sub>), 1.65-1.46 (m, 2H, CH<sub>2</sub>, CH<sub>3</sub>CH), 1.40-1.24 (m, 2H, CH<sub>2</sub>), 0.96-0.90 (m, 6H, CH<sub>3</sub>).

<sup>13</sup>C NMR (CDCl<sub>3</sub>, 100 MHz): δ 144.3, 129.2, 126.8, 125.9, 116.8, 114.2, 38.5, 36.4, 35.9, 34.6, 28.4, 26.2, 23.1, 22.6.

HRMS (ESI, *m/z*): calcd. for C<sub>14</sub>H<sub>22</sub>N [M+H]<sup>+</sup>: 204.1747, found: 204.1740.

HPLC: Chiracel-ADH, *n*-heptane/*i*-PrOH 95:5, 0.5 mL/min., 40 °C, detection at 247 nm. Retention time (min): 9.8 (major) and 10.9 (minor).

#### (*S*)-4-(3-Phenylpropyl)-1,2,3,4-tetrahydroquinoline (**4f**)

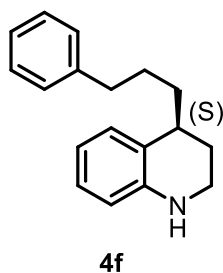

The reaction was performed with **1a** (0.2 mmol, 1 equiv.), CuTc (0.01 mmol, 5 mol%), ligand (*R,R*)-**L1** (0.012 mmol, 6 mol%), BF<sub>3</sub>·Et<sub>2</sub>O (0.4 mmol, 2 equiv.), Ph(CH<sub>2</sub>)<sub>3</sub>MgBr (2.6 M in Et<sub>2</sub>O, 0.6 mmol, 3 equiv.), CH<sub>2</sub>Cl<sub>2</sub> (2.0 mL) at -78 °C for 2 h, and following **General reducing procedure**. Product **4f** was obtained as a colorless oil after column chromatography (SiO<sub>2</sub>, pentane:Et<sub>2</sub>O = 30:1) [99% conversion, 83% yield, >99% *ee*].

<sup>1</sup>H NMR (CDCl<sub>3</sub>, 400 MHz): δ 7.35-7.27 (m, 2H, CH<sub>Ar</sub>), 7.25-7.18 (m, 3H, CH<sub>Ar</sub>), 7.04-6.96 (m, 2H, CH<sub>Ar</sub>), 6.67-6.60 (m, 1H, CH<sub>Ar</sub>), 6.49 (d, *J* = 7.9 Hz, 1H, CH<sub>Ar</sub>), 3.85 (bs, 1H, NH), 3.37-3.22 (m, 2H, NHCH<sub>2</sub>), 2.84-2.75 (m, 1H, NHCH<sub>2</sub>CH<sub>2</sub>CH), 2.75-2.59 (m, 2H, PhCH<sub>2</sub>), 2.01-1.90 (m, 1H, CH<sub>2</sub>), 1.88-1.68 (m, 4H, CH<sub>2</sub>), 1.67-1.53 (m, 1H, CH<sub>2</sub>).

<sup>13</sup>C NMR (CDCl<sub>3</sub>, 100 MHz): δ 144.3, 142.7, 129.2, 128.5, 128.4, 126.9, 125.8, 125.5, 116.8, 114.2, 38.5, 36.4, 36.2, 35.6, 29.1, 26.3.

HRMS (ESI, m/Z): calcd. for C<sub>18</sub>H<sub>22</sub>N [M+H]<sup>+</sup>: 252.1747, found: 252.1740.

HPLC: Chiracel-ADH, *n*-heptane/*i*-PrOH 95:5, 0.5 mL/min., 40 °C, detection at 247 nm. Retention time (min): 18.3 (minor) and 22.4 (major).

**(S)-4-(Hept-6-en-1-yl)-1,2,3,4-tetrahydroquinoline (4g)**

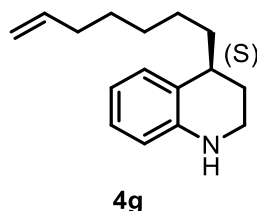

The reaction was performed with **1a** (0.2 mmol, 1 equiv.), CuTc (0.01 mmol, 5 mol%), ligand (*R,R*)-**L1** (0.012 mmol, 6 mol%), BF<sub>3</sub>·Et<sub>2</sub>O (0.4 mmol, 2 equiv.), Hept-6-en-1-ylMgBr (1.4 M in Et<sub>2</sub>O, 0.6 mmol, 3 equiv.), CH<sub>2</sub>Cl<sub>2</sub> (2.0 mL) at -78 °C for 2 h, and following **General reducing procedure**. Product **4g** was obtained as a colorless oil after column chromatography (SiO<sub>2</sub>, pentane:Et<sub>2</sub>O = 30:1) [99% conversion, 84% yield, >99% *ee*].

<sup>1</sup>H NMR (CDCl<sub>3</sub>, 400 MHz): δ 7.06-6.94 (m, 2H, CH<sub>Ar</sub>), 6.67-6.59 (m, 1H, CH<sub>Ar</sub>), 6.48 (d, *J* = 7.9 Hz, 1H, CH<sub>Ar</sub>), 5.83 (ddt, *J* = 16.9, 10.1, 6.7 Hz, 1H, CH<sub>2</sub>=CH), 5.07-4.92 (m, 2H, CH<sub>2</sub>=), 3.85 (bs, 1H, NH), 3.34 (dt, *J* = 10.7, 3.6 Hz, 1H, NHCHH), 3.26 (dt, *J* = 10.9, 4.7 Hz, 1H, NHCHH), 2.80-2.69 (m, 1H, NHCH<sub>2</sub>CH<sub>2</sub>CH), 2.13-2.01 (m, 2H, CH<sub>2</sub>), 2.00-1.88 (m, 1H, CH<sub>2</sub>), 1.86-1.76 (m, 1H, CH<sub>2</sub>), 1.75-1.64 (m, 1H, CH<sub>2</sub>), 1.59-1.30 (m, 7H, CH<sub>2</sub>).

<sup>13</sup>C NMR (CDCl<sub>3</sub>, 100 MHz): δ 144.3, 139.3, 129.2, 126.8, 125.8, 116.7, 114.3, 114.2, 38.6, 36.8, 35.6, 33.9, 29.4, 29.1, 27.0, 26.3.

HRMS (ESI, m/Z): calcd. for C<sub>16</sub>H<sub>24</sub>N [M+H]<sup>+</sup>: 230.1903, found: 230.1895.

HPLC: Chiracel-ADH, *n*-heptane/*i*-PrOH 95:5, 0.5 mL/min., 40 °C, detection at 247 nm. Retention time (min): 9.9 (major) and 11.1 (minor).

**(R)-4-(2-Trimethylsilylethyl)-1,2,3,4-tetrahydroquinoline (4h)**

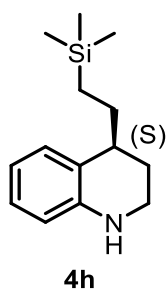

The reaction was performed with **1a** (0.2 mmol, 1 equiv.), CuTc (0.01 mmol, 5 mol%), ligand (*R,R*)-**L1** (0.012 mmol, 6 mol%), BF<sub>3</sub>·Et<sub>2</sub>O (0.4 mmol, 2 equiv.), Me<sub>3</sub>Si(CH<sub>2</sub>)<sub>2</sub>MgBr (0.4 M in 2-Me-THF, 0.6 mmol, 3 equiv.), CH<sub>2</sub>Cl<sub>2</sub> (2.0 mL) at -78 °C for 16 h, and following **General reducing procedure**. Product **4h** was obtained as a colorless oil after column chromatography (SiO<sub>2</sub>, pentane:Et<sub>2</sub>O = 40:1) [99% conversion, 67% yield, >99% *ee*].

<sup>1</sup>H NMR (CDCl<sub>3</sub>, 400 MHz): δ 7.07-7.02 (m, 1H, CH<sub>Ar</sub>), 7.02-6.95 (m, 1H, CH<sub>Ar</sub>), 6.68-6.61 (m, 1H, CH<sub>Ar</sub>), 6.53-6.47 (m, 1H, CH<sub>Ar</sub>), 3.74 (bs, 1H, NH), 3.35-3.22 (m, 2H, NHCH<sub>2</sub>), 2.72-2.62 (m, 1H, NHCH<sub>2</sub>CH<sub>2</sub>CH), 1.98-1.85 (m, 2H, CH<sub>2</sub>), 1.77-1.64 (m, 1H, CH<sub>2</sub>), 1.59-1.46 (m, 1H, CH<sub>2</sub>), 0.67 (dt, *J* = 13.6, 4.4 Hz, 1H, SiCHH), 0.67 (ddd, *J* = 14.1, 12.6, 4.8 Hz, 1H, SiCHH), 0.01 (s, 9H, CH<sub>3</sub>).

<sup>13</sup>C NMR (CDCl<sub>3</sub>, 100 MHz): δ 144.4, 129.3, 126.9, 125.8, 116.8, 114.2, 38.5, 38.4, 30.9, 25.3, 13.9, -1.56.

HRMS (ESI, *m/z*): calcd. for C<sub>14</sub>H<sub>24</sub>NSi [M+H]<sup>+</sup>: 234.1673, found: 234.1665.

HPLC: Chiracel-ADH, *n*-heptane/*i*-PrOH 98:2, 0.5 mL/min., 40 °C, detection at 247 nm. Retention time (min): 9.7 (major) and 11.2 (minor).

**(S)-4-Ethyl-6-fluoro-1,2,3,4-tetrahydroquinoline (5a)**

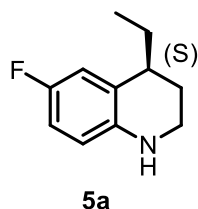

The reaction was performed with the substrate (0.2 mmol, 1 equiv.), CuTc (1.91 mg, 0.01 mmol, 5 mol%), ligand (*R,R*)-**L1** (6.08 mg, 0.012 mmol, 6 mol%), BF<sub>3</sub>·Et<sub>2</sub>O (49 μL, 0.4 mmol, 2 equiv.), EtMgBr (3 M in Et<sub>2</sub>O, 0.4 mmol, 2 equiv.), CH<sub>2</sub>Cl<sub>2</sub> (2.0 mL) at -78 °C for 2 h, and following **General**

**reducing procedure.** Product **5a** was obtained as a colorless oil after column chromatography (SiO<sub>2</sub>, pentane:Et<sub>2</sub>O = 20:1) [99% conversion, 70% yield, >99% *ee*].

<sup>1</sup>H NMR (CDCl<sub>3</sub>, 400 MHz): δ 6.76 (dd, *J* = 9.8, 2.9 Hz, 1H, CH<sub>Ar</sub>), 6.73-6.65 (m, 1H, CH<sub>Ar</sub>), 6.40 (dd, *J* = 8.7, 4.9 Hz, 1H, CH<sub>Ar</sub>), 3.74 (bs, 1H, NH), 3.33-3.19 (m, 2H, NHCH<sub>2</sub>), 2.68-2.59 (m, 1H, CH<sub>3</sub>CH<sub>2</sub>CH), 1.96-1.86 (m, 1H, CH<sub>2</sub>), 1.84-1.68 (m, 2H, CH<sub>2</sub>), 1.61-1.47 (m, 1H, CH<sub>2</sub>), 0.98 (t, *J* = 7.4 Hz, 3H, CH<sub>3</sub>).

<sup>13</sup>C NMR (CDCl<sub>3</sub>, 400 MHz): δ 155.5 (d, *J* = 234.1 Hz), 140.6 (d, *J* = 1.9 Hz), 127.0 (d, *J* = 6.2 Hz), 115.3 (d, *J* = 21.7 Hz), 114.9 (d, *J* = 7.4 Hz), 113.4 (d, *J* = 22.4 Hz), 39.0, 37.4, 29.2, 25.8, 11.6.

<sup>19</sup>F NMR (CDCl<sub>3</sub>, 400 MHz): δ -128.2.

HRMS (ESI, *m/z*): calcd. for C<sub>11</sub>H<sub>15</sub>NF [M+H]<sup>+</sup>: 180.1183, found: 180.1182.

HPLC: Chiracel-ADH, *n*-heptane/*i*-PrOH 95:5, 0.5 mL/min., 40 °C, detection at 242 nm. Retention time (min): 12.7 (major) and 14.6 (minor).

#### (*S*)-6-Bromo-4-ethyl-1,2,3,4-tetrahydroquinoline (**5b**)

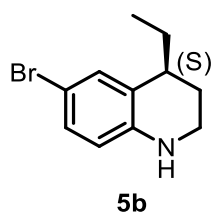

The reaction was performed with the substrate (0.2 mmol, 1 equiv.), CuTc (0.01 mmol, 5 mol%), ligand (*R,R*)-**L1** (0.012 mmol, 6 mol%), BF<sub>3</sub>·Et<sub>2</sub>O (0.4 mmol, 2 equiv.), EtMgBr (3 M in Et<sub>2</sub>O, 0.4 mmol, 2 equiv.), CH<sub>2</sub>Cl<sub>2</sub> (2.0 mL) at -78 °C for 2 h, and following **General reducing procedure**. Product **5b** was obtained as a white solid after column chromatography (SiO<sub>2</sub>, pentane:Et<sub>2</sub>O = 15:1) [99% conversion, 70% yield, >99% *ee*]. **5b** was dissolved in the mixed solvent of CH<sub>2</sub>Cl<sub>2</sub> and pentane, and left for slow evaporation at RT in the air to afford the colorless single crystal.

<sup>1</sup>H NMR (CDCl<sub>3</sub>, 400 MHz): δ 7.14-7.10 (m, 1H, CH<sub>Ar</sub>), 7.03 (dd, *J* = 8.5, 2.3 Hz, 1H, CH<sub>Ar</sub>), 6.37 (d, *J* = 8.5 Hz, 1H, CH<sub>Ar</sub>), 3.87 (bs, 1H, NH), 3.35-3.20 (m, 2H, NHCH<sub>2</sub>), 2.67-2.58 (m, 1H, CH<sub>3</sub>CH<sub>2</sub>CH), 1.94-1.66 (m, 3H, CH<sub>2</sub>), 1.59-1.45 (m, 1H, CH<sub>2</sub>), 1.61-1.47 (m, 1H, CH<sub>2</sub>), 0.98 (t, *J* = 7.4 Hz, 3H, CH<sub>3</sub>).

<sup>13</sup>C NMR (CDCl<sub>3</sub>, 100 MHz): δ 143.3, 131.6, 129.5, 127.5, 115.6, 108.1, 38.5, 37.3, 29.1, 25.3, 11.6.

HRMS (ESI, m/Z): calcd. for C<sub>11</sub>H<sub>15</sub>NBr [M+H]<sup>+</sup>: 240.0382, found: 240.0383.

HPLC: Chiracel-ADH, *n*-heptane/*i*-PrOH 95:5, 0.5 mL/min., 40 °C, detection at 253 nm. Retention time (min): 13.4 (major) and 15.2 (minor).

**(S)-4-Ethyl-6-methyl-1,2,3,4-tetrahydroquinoline (5c)**

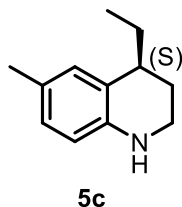

The reaction was performed with the substrate (0.2 mmol, 1 equiv.), CuTc (0.01 mmol, 5 mol%), ligand (*R,R*)-**L1** (0.012 mmol, 6 mol%), BF<sub>3</sub>·Et<sub>2</sub>O (0.4 mmol, 2 equiv.), EtMgBr (3 M in Et<sub>2</sub>O, 0.4 mmol, 2 equiv.), CH<sub>2</sub>Cl<sub>2</sub> (2.0 mL) at -78 °C for 2 h, and following **General reducing procedure**. Product **5c** was obtained as a colorless oil after column chromatography (SiO<sub>2</sub>, pentane:Et<sub>2</sub>O = 30:1) [98% conversion, 68% yield, 99% *ee*].

<sup>1</sup>H NMR (CDCl<sub>3</sub>, 400 MHz): δ 6.86 (d, *J* = 2.0 Hz, 1H, CH<sub>Ar</sub>), 6.80 (dd, *J* = 8.1, 2.0 Hz, 1H, CH<sub>Ar</sub>), 6.42 (d, *J* = 8.0 Hz, 1H, CH<sub>Ar</sub>), 3.68 (bs, 1H, NH), 3.35-3.19 (m, 2H, NHCH<sub>2</sub>), 2.68-2.58 (m, 1H, CH<sub>3</sub>CH<sub>2</sub>CH), 2.23 (s, 1H, PhCH<sub>3</sub>), 1.98-1.88 (m, 1H, CH<sub>2</sub>), 1.86-1.71 (m, 1H, CH<sub>2</sub>), 1.61-1.48 (m, 1H, CH<sub>2</sub>), 1.00 (t, *J* = 7.4 Hz, 3H, CH<sub>2</sub>CH<sub>3</sub>).

<sup>13</sup>C NMR (CDCl<sub>3</sub>, 100 MHz): δ 142.0, 129.8, 127.4, 126.0, 125.9, 114.5, 38.8, 37.3, 29.5, 26.1, 20.7, 11.8.

HRMS (ESI, m/Z): calcd. for C<sub>12</sub>H<sub>18</sub>N [M+H]<sup>+</sup>: 176.1434, found: 176.1435.

HPLC: Chiracel-ADH, *n*-heptane/*i*-PrOH 95:5, 0.5 mL/min., 40 °C, detection at 248 nm. Retention time (min): 10.4 (major) and 11.7 (minor).

**(S)-4-Ethyl-6-methoxy-1,2,3,4-tetrahydroquinoline (5d)**

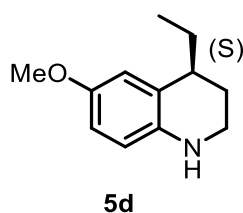

The reaction was performed with the substrate (0.2 mmol, 1 equiv.), CuTc (0.01 mmol, 5 mol%), ligand (*R,R*)-**L1** (0.012 mmol, 6 mol%), BF<sub>3</sub>·Et<sub>2</sub>O (0.4 mmol, 2 equiv.), EtMgBr (3 M in Et<sub>2</sub>O, 0.6 mmol, 3 equiv.), CH<sub>2</sub>Cl<sub>2</sub> (2.0 mL) at -78 °C for 2 h, and following **General reducing procedure**. Product **5d** was obtained as a colorless oil after column chromatography (SiO<sub>2</sub>, pentane:Et<sub>2</sub>O = 20:1) [92% conversion, 76% yield, >99% *ee*].

<sup>1</sup>H NMR (CDCl<sub>3</sub>, 400 MHz): δ 6.66 (d, *J* = 2.9 Hz, 1H, CH<sub>Ar</sub>), 6.61 (dd, *J* = 8.6, 2.9 Hz, 1H, CH<sub>Ar</sub>), 6.46 (d, *J* = 8.6 Hz, 1H, CH<sub>Ar</sub>), 3.74 (s, 1H, OCH<sub>3</sub>), 3.47 (bs, 1H, NH), 3.34-3.16 (m, 2H, NHCH<sub>2</sub>), 2.70-2.60 (m, 1H, CH<sub>3</sub>CH<sub>2</sub>CH), 1.98-1.88 (m, 2H, CH<sub>2</sub>), 1.85-1.72 (m, 2H, CH<sub>2</sub>), 1.63-1.49 (m, 1H, CH<sub>2</sub>), 1.00 (t, *J* = 7.4 Hz, 3H, CH<sub>2</sub>CH<sub>3</sub>).

<sup>13</sup>C NMR (CDCl<sub>3</sub>, 100 MHz): δ 152.2, 137.8, 127.7, 115.9, 114.9, 112.9, 56.0, 39.2, 37.4, 29.4, 26.0, 11.7.

HRMS (ESI, *m/z*): calcd. for C<sub>12</sub>H<sub>18</sub>NO [M+H]<sup>+</sup>: 192.1383, found: 192.1383.

HPLC: Chiracel-ADH, *n*-heptane/*i*-PrOH 95:5, 0.5 mL/min., 40 °C, detection at 245 nm. Retention time (min): 16.9 (major) and 18.5 (minor).

#### (*S*)-Methyl 4-ethyl-1,2,3,4-tetrahydroquinoline-6-carboxylate (**5e**)

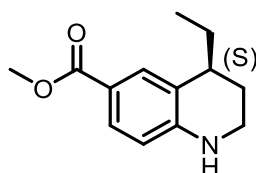

**5e**

The reaction was performed with the substrate (0.2 mmol, 1 equiv.), CuTc (0.01 mmol, 5 mol%), ligand (*R,R*)-**L1** (0.012 mmol, 6 mol%), BF<sub>3</sub>·Et<sub>2</sub>O (0.24 mmol, 1.2 equiv.), EtMgBr (3 M in Et<sub>2</sub>O, 0.4 mmol, 2 equiv.), CH<sub>2</sub>Cl<sub>2</sub> (2.0 mL) at -78 °C for 2 h, and following **General reducing procedure**. Product **5e** was obtained as a colorless oil after column chromatography (SiO<sub>2</sub>, pentane:Et<sub>2</sub>O = 10:1) [98% conversion, 84% yield, 98% *ee*].

<sup>1</sup>H NMR (CDCl<sub>3</sub>, 400 MHz): δ 7.70 (d, *J* = 2.1 Hz, 1H, CH<sub>Ar</sub>), 7.64 (dd, *J* = 8.4, 2.0 Hz, 1H, CH<sub>Ar</sub>), 6.39 (d, *J* = 8.4 Hz, 1H, CH<sub>Ar</sub>), 4.40 (bs, 1H, NH), 3.83 (s, 1H, OCH<sub>3</sub>), 3.40-3.27 (m, 2H, NHCH<sub>2</sub>), 2.70-2.62 (m, 1H, CH<sub>3</sub>CH<sub>2</sub>CH), 1.92-1.79 (m, 2H, CH<sub>2</sub>), 1.77-1.68 (m, 1H, CH<sub>2</sub>), 1.57-1.47 (m, 1H, CH<sub>2</sub>), 0.98 (t, *J* = 7.4 Hz, 3H, CH<sub>2</sub>CH<sub>3</sub>).

$^{13}\text{C}$  NMR ( $\text{CDCl}_3$ , 100 MHz):  $\delta$  167.8, 148.4, 131.2, 129.2, 124.0, 117.2, 112.8, 51.5, 38.2, 37.2, 28.7, 25.0, 11.6.

HRMS (ESI,  $m/z$ ): calcd. for  $\text{C}_{13}\text{H}_{18}\text{NO}_2$   $[\text{M}+\text{H}]^+$ : 220.1332, found: 220.1331.

HPLC: Chiracel-OJH, *n*-heptane/*i*-PrOH 95:5, 0.5 mL/min., 40 °C, detection at 225 nm. Retention time (min): 24.7 (major) and 26.4 (minor).

**(S)-6-Cyano-4-ethyl-1,2,3,4-tetrahydroquinoline (5f)**

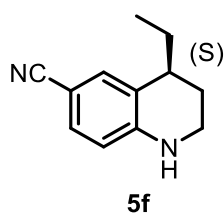

The reaction was performed with the substrate (0.2 mmol, 1 equiv.), CuTc (0.01 mmol, 5 mol%), ligand (*R,R*)-**L1** (0.012 mmol, 6 mol%),  $\text{BF}_3 \cdot \text{Et}_2\text{O}$  (0.4 mmol, 2 equiv.), EtMgBr (3 M in  $\text{Et}_2\text{O}$ , 0.4 mmol, 2 equiv.),  $\text{CH}_2\text{Cl}_2$  (2.0 mL) at  $-78$  °C for 2 h, and following **General reducing procedure**. Product **5f** was obtained as a colorless oil after column chromatography ( $\text{SiO}_2$ , pentane: $\text{Et}_2\text{O}$  = 10:1) [99% conversion, 70% yield, 99% *ee*].

$^1\text{H}$  NMR ( $\text{CDCl}_3$ , 400 MHz):  $\delta$  7.23 (d,  $J$  = 1.9 Hz, 1H,  $\text{CH}_{\text{Ar}}$ ), 7.19 (dd,  $J$  = 8.3, 1.9 Hz, 1H,  $\text{CH}_{\text{Ar}}$ ), 6.40 (d,  $J$  = 8.3 Hz, 1H,  $\text{CH}_{\text{Ar}}$ ), 4.45 (bs, 1H, NH), 3.42-3.28 (m, 2H,  $\text{NHCH}_2$ ), 2.67-2.57 (m, 1H,  $\text{CH}_3\text{CH}_2\text{CH}$ ), 1.92-1.77 (m, 2H,  $\text{CH}_2$ ), 1.72-1.59 (m, 1H,  $\text{CH}_2$ ), 1.58-1.44 (m, 1H,  $\text{CH}_2$ ), 0.97 (t,  $J$  = 7.4 Hz, 3H,  $\text{CH}_3$ ).

$^{13}\text{C}$  NMR ( $\text{CDCl}_3$ , 100 MHz):  $\delta$  147.8, 133.1, 131.2, 124.9, 121.1, 113.5, 97.5, 38.2, 37.1, 28.4, 24.7, 11.4.

HRMS (ESI,  $m/z$ ): calcd. for  $\text{C}_{12}\text{H}_{15}\text{N}_2$   $[\text{M}+\text{H}]^+$ : 187.1230, found: 187.1228.

HPLC: Chiracel-ADH, *n*-heptane/*i*-PrOH 90:10, 0.5 mL/min., 40 °C, detection at 281 nm. Retention time (min): 18.9 (major) and 19.7 (minor).

**(S)-7-Bromo-4-ethyl-1,2,3,4-tetrahydroquinoline (5g)**

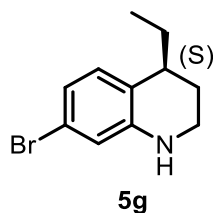

The reaction was performed with the substrate (0.2 mmol, 1 equiv.), CuTc (0.01 mmol, 5 mol%), ligand (*R,R*)-**L1** (0.012 mmol, 6 mol%),  $\text{BF}_3 \cdot \text{Et}_2\text{O}$  (0.4 mmol, 2 equiv.),  $\text{EtMgBr}$  (3 M in  $\text{Et}_2\text{O}$ , 0.4 mmol, 2 equiv.),  $\text{CH}_2\text{Cl}_2$  (2.0 mL) at  $-78^\circ\text{C}$  for 2 h, and following **General reducing procedure**. Product **5g** was obtained as a colorless oil after column chromatography ( $\text{SiO}_2$ , pentane: $\text{Et}_2\text{O}$  = 20:1) [99% conversion, 77% yield, >99% *ee*].

$^1\text{H}$  NMR ( $\text{CDCl}_3$ , 400 MHz):  $\delta$  6.85 (dd,  $J$  = 8.1, 0.8 Hz, 1H,  $\text{CH}_{\text{Ar}}$ ), 6.70 (dd,  $J$  = 8.1, 2.0 Hz, 1H,  $\text{CH}_{\text{Ar}}$ ), 6.60 (d,  $J$  = 1.9 Hz, 1H,  $\text{CH}_{\text{Ar}}$ ), 3.90 (bs, 1H,  $\text{NH}$ ), 3.35-3.21 (m, 2H,  $\text{NHCH}_2$ ), 2.65-2.55 (m, 1H,  $\text{CH}_3\text{CH}_2\text{CH}$ ), 1.93-1.76 (m, 2H,  $\text{CH}_2$ ), 1.75-1.63 (m, 1H,  $\text{CH}_2$ ), 1.58-1.45 (m, 1H,  $\text{CH}_2$ ), 0.98 (t,  $J$  = 7.4 Hz, 3H,  $\text{CH}_3$ ).

$^{13}\text{C}$  NMR ( $\text{CDCl}_3$ , 100 MHz):  $\delta$  145.6, 130.6, 124.2, 120.1, 119.2, 116.3, 38.3, 37.0, 29.0, 25.4, 11.6.

HRMS (ESI,  $m/z$ ): calcd. for  $\text{C}_{11}\text{H}_{15}\text{NBr}$  [ $\text{M}+\text{H}$ ] $^+$ : 240.0382, found: 240.0382.

HPLC: Chiracel-OBH, *n*-heptane/*i*-PrOH 95:5, 0.5 mL/min.,  $40^\circ\text{C}$ , detection at 250 nm. Retention time (min): 12.8 (major) and 15.2 (minor).

**(S)-4-Ethyl-7-methyl-1,2,3,4-tetrahydroquinoline (5h)**

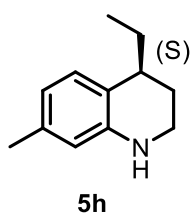

The reaction was performed with the substrate (0.2 mmol, 1 equiv.), CuTc (0.01 mmol, 5 mol%), ligand (*R,R*)-**L1** (0.012 mmol, 6 mol%),  $\text{BF}_3 \cdot \text{Et}_2\text{O}$  (0.4 mmol, 2 equiv.),  $\text{EtMgBr}$  (3 M in  $\text{Et}_2\text{O}$ , 0.4 mmol, 2 equiv.),  $\text{CH}_2\text{Cl}_2$  (2.0 mL) at  $-78^\circ\text{C}$  for 2 h, and following **General reducing procedure**. Product **5h** was obtained as a colorless oil after column chromatography ( $\text{SiO}_2$ , pentane: $\text{Et}_2\text{O}$  = 20:1) [96% conversion, 82% yield, >99% *ee*].



$^1\text{H}$  NMR ( $\text{CDCl}_3$ , 400 MHz):  $\delta$  6.94 (d,  $J = 7.7$  Hz, 1H,  $\text{CH}_{\text{Ar}}$ ), 6.50-6.44 (m, 1H,  $\text{CH}_{\text{Ar}}$ ), 6.33 (s, 1H,  $\text{CH}_{\text{Ar}}$ ), 3.76 (bs, 1H, NH), 3.37-3.19 (m, 2H,  $\text{NHCH}_2$ ), 2.68-2.58 (m, 1H,  $\text{CH}_3\text{CH}_2\text{CH}$ ), 2.23 (s, 3H,  $\text{PhCH}_3$ ), 1.98-1.88 (m, 1H,  $\text{CH}_2$ ), 1.86-1.69 (m, 2H,  $\text{CH}_2$ ), 1.60-1.47 (m, 1H,  $\text{CH}_2$ ), 1.00 (t,  $J = 7.4$  Hz, 3H,  $\text{CH}_2\text{CH}_3$ ).

$^{13}\text{C}$  NMR ( $\text{CDCl}_3$ , 100 MHz):  $\delta$  144.3, 136.5, 129.2, 122.9, 117.8, 114.8, 38.7, 37.0, 29.4, 26.1, 21.2, 11.8.

HRMS (ESI,  $m/z$ ): calcd. for  $\text{C}_{12}\text{H}_{18}\text{N}$   $[\text{M}+\text{H}]^+$ : 176.1434, found: 176.1433.

HPLC: Chiracel-OBH, *n*-heptane/*i*-PrOH 95:5, 0.5 mL/min., 40 °C, detection at 248 nm. Retention time (min): 10.7 (major) and 13.0 (minor).

#### (*S*)-4-Ethyl-7-methoxy-1,2,3,4-tetrahydroquinoline (**5i**)

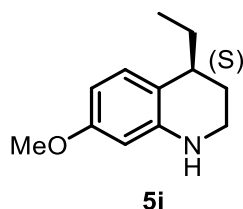

The reaction was performed with the substrate (0.2 mmol, 1 equiv.), CuTc (0.01 mmol, 5 mol%), ligand (*R,R*)-**L1** (0.012 mmol, 6 mol%),  $\text{BF}_3 \cdot \text{Et}_2\text{O}$  (0.4 mmol, 2 equiv.),  $\text{EtMgBr}$  (3 M in  $\text{Et}_2\text{O}$ , 0.6 mmol, 3 equiv.),  $\text{CH}_2\text{Cl}_2$  (2.0 mL) at  $-78$  °C for 2 h, and following **General reducing procedure**. Product **5i** was obtained as a colorless oil after column chromatography ( $\text{SiO}_2$ , pentane: $\text{Et}_2\text{O}$  = 30:1) [98% conversion, 81% yield, >99% *ee*].

$^1\text{H}$  NMR ( $\text{CDCl}_3$ , 400 MHz):  $\delta$  6.94 (d,  $J = 8.3$  Hz, 1H,  $\text{CH}_{\text{Ar}}$ ), 6.23 (dd,  $J = 8.4, 2.5$  Hz, 1H,  $\text{CH}_{\text{Ar}}$ ), 6.05 (d,  $J = 2.5$  Hz, 1H,  $\text{CH}_{\text{Ar}}$ ), 3.85 (bs, 1H, NH), 3.74 (s, 3H,  $\text{OCH}_3$ ), 3.36-3.20 (m, 2H,  $\text{NHCH}_2$ ), 2.66-2.57 (m, 1H,  $\text{CH}_3\text{CH}_2\text{CH}$ ), 1.98-1.86 (m, 1H,  $\text{CH}_2$ ), 1.85-1.66 (m, 2H,  $\text{CH}_2$ ), 1.59-1.45 (m, 1H,  $\text{CH}_2$ ), 0.99 (t,  $J = 7.4$  Hz, 3H,  $\text{CH}_2\text{CH}_3$ ).

$^{13}\text{C}$  NMR ( $\text{CDCl}_3$ , 100 MHz):  $\delta$  158.8, 145.2, 129.9, 118.4, 102.7, 99.3, 55.2, 38.6, 36.6, 29.4, 26.1, 11.7.

HRMS (ESI,  $m/z$ ): calcd. for  $\text{C}_{12}\text{H}_{18}\text{NO}$   $[\text{M}+\text{H}]^+$ : 192.1383, found: 192.1381.

HPLC: Chiracel-ADH, *n*-heptane/*i*-PrOH 95:5, 0.5 mL/min., 40 °C, detection at 245 nm. Retention time (min): 20.1 (minor) and 24.2 (major).

**(S)-4-Ethyl-7-vinyl-1,2,3,4-tetrahydroquinoline (5j)**

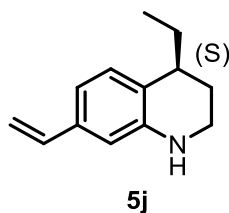

The reaction was performed with the substrate (0.2 mmol, 1 equiv.), CuTc (0.01 mmol, 5 mol%), ligand (*R,R*)-**L1** (0.012 mmol, 6 mol%),  $\text{BF}_3 \cdot \text{Et}_2\text{O}$  (0.24 mmol, 1.2 equiv.), EtMgBr (3 M in  $\text{Et}_2\text{O}$ , 0.4 mmol, 2 equiv.),  $\text{CH}_2\text{Cl}_2$  (2.0 mL) at  $-78^\circ\text{C}$  for 2 h, and following **General reducing procedure**. Product **5j** was obtained as a colorless oil after column chromatography ( $\text{SiO}_2$ , pentane: $\text{Et}_2\text{O}$  = 50:1) [98% conversion, 60% yield, >99% *ee*].

$^1\text{H}$  NMR ( $\text{CDCl}_3$ , 400 MHz):  $\delta$  6.99 (d,  $J = 7.8$  Hz, 1H,  $\text{CH}_{\text{Ar}}$ ), 6.71 (dd,  $J = 7.1, 1.6$  Hz, 1H,  $\text{CH}_{\text{Ar}}$ ), 6.60 (dd,  $J = 17.6, 10.9$  Hz, 1H,  $\text{CH}_2=\text{CH}$ ), 6.53 (d,  $J = 1.6$  Hz, 1H,  $\text{CH}_{\text{Ar}}$ ), 5.64 (dd,  $J = 17.6, 1.1$  Hz, 1H,  $\text{CHH}=\text{CH}$ ), 5.14 (dd,  $J = 10.9, 1.1$  Hz, 1H,  $\text{CHH}=\text{CH}$ ), 3.85 (bs, 1H,  $\text{NH}$ ), 3.40-3.19 (m, 2H,  $\text{NHCH}_2$ ), 2.71-2.61 (m, 1H,  $\text{CH}_3\text{CH}_2\text{CH}$ ), 1.99-1.87 (m, 1H,  $\text{CH}_2$ ), 1.87-1.68 (m, 2H,  $\text{CH}_2$ ), 1.61-1.47 (m, 1H,  $\text{CH}_2$ ), 0.99 (t,  $J = 7.4$  Hz, 3H,  $\text{CH}_3$ ).

$^{13}\text{C}$  NMR ( $\text{CDCl}_3$ , 100 MHz):  $\delta$  144.4, 137.2, 136.4, 129.4, 125.6, 115.0, 112.7, 111.8, 38.7, 37.2, 29.3, 25.9, 11.7.

HRMS (ESI,  $m/z$ ): calcd. for  $\text{C}_{13}\text{H}_{18}\text{N}$   $[\text{M}+\text{H}]^+$ : 188.1434, found: 188.1432.

HPLC: Chiracel-OBH, *n*-heptane/*i*-PrOH 95:5, 0.5 mL/min.,  $40^\circ\text{C}$ , detection at 239 nm. Retention time (min): 15.9 (major) and 23.1 (minor).

**(S)-5-Chloro-4-ethyl-1,2,3,4-tetrahydroquinoline (5k)**

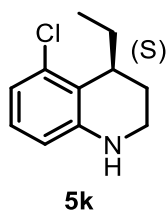

The reaction was performed with the substrate (0.2 mmol, 1 equiv.), CuTc (0.01 mmol, 5 mol%), ligand (*R,R*)-**L1** (0.012 mmol, 6 mol%),  $\text{BF}_3 \cdot \text{Et}_2\text{O}$  (0.4 mmol, 2 equiv.), EtMgBr (3 M in  $\text{Et}_2\text{O}$ , 0.4 mmol, 2 equiv.),  $\text{CH}_2\text{Cl}_2$  (2.0 mL) at  $-78^\circ\text{C}$  for 2 h, and following **General reducing procedure**.

Product **5k** was obtained as a colorless oil after column chromatography (SiO<sub>2</sub>, pentane:Et<sub>2</sub>O = 20:1) [99% conversion, 77% yield, >99% *ee*].

<sup>1</sup>H NMR (CDCl<sub>3</sub>, 400 MHz): δ 6.92-6.84 (m, 1H, CH<sub>Ar</sub>), 6.65 (dd, *J* = 7.9, 1.1 Hz, 1H, CH<sub>Ar</sub>), 6.35 (dd, *J* = 8.1, 1.1 Hz, 1H, CH<sub>Ar</sub>), 4.00 (bs, 1H, NH), 3.38-3.21 (m, 2H, NHCH<sub>2</sub>), 3.02-2.93 (m, 1H, CH<sub>3</sub>CH<sub>2</sub>CH), 2.03-1.94 (m, 1H, CH<sub>2</sub>), 1.85-1.68 (m, 2H, CH<sub>2</sub>), 1.45-1.30 (m, 1H, CH<sub>2</sub>), 1.02 (t, *J* = 7.4 Hz, 3H, CH<sub>3</sub>).

<sup>13</sup>C NMR (CDCl<sub>3</sub>, 100 MHz): δ 145.2, 134.7, 127.3, 123.6, 117.4, 112.3, 36.8, 34.8, 27.0, 23.0, 11.8.

HRMS (ESI, *m/z*): calcd. for C<sub>11</sub>H<sub>15</sub>NCl [M+H]<sup>+</sup>: 196.0888, found: 196.0887.

HPLC: Chiracel-OBH, *n*-heptane/*i*-PrOH 99:1, 0.5 mL/min., 40 °C, detection at 250 nm. Retention time (min): 11.9 (major) and 12.5 (minor).

#### (*S*)-4-Ethyl-5-methyl-1,2,3,4-tetrahydroquinoline (**5l**)

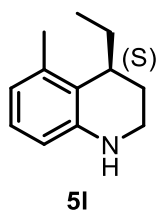

The reaction was performed with the substrate (0.2 mmol, 1 equiv.), CuTc (0.01 mmol, 5 mol%), ligand (*R,R*)-**L1** (0.012 mmol, 6 mol%), BF<sub>3</sub>·Et<sub>2</sub>O (0.6 mmol, 3 equiv.), EtMgBr (3 M in Et<sub>2</sub>O, 0.6 mmol, 3 equiv.), CH<sub>2</sub>Cl<sub>2</sub> (2.0 mL) at -78 °C for 24 h, and following **General reducing procedure**. Product **5l** was obtained as a colorless oil after column chromatography (SiO<sub>2</sub>, pentane:Et<sub>2</sub>O = 40:1) [95% conversion, 80% yield, 98% *ee*].

<sup>1</sup>H NMR (CDCl<sub>3</sub>, 400 MHz): δ 6.92-6.86 (m, 1H, CH<sub>Ar</sub>), 6.49 (d, *J* = 7.4 Hz, 1H, CH<sub>Ar</sub>), 6.34 (d, *J* = 8.0 Hz, 1H, CH<sub>Ar</sub>), 3.81 (bs, 1H, NH), 3.41-3.20 (m, 2H, NHCH<sub>2</sub>), 2.79-2.70 (m, 1H, CH<sub>3</sub>CH<sub>2</sub>CH), 2.26 (s, 1H, PhCH<sub>3</sub>), 2.01-1.94 (m, 1H, CH<sub>2</sub>), 1.83-1.71 (m, 1H, CH<sub>2</sub>), 1.68-1.55 (m, 1H, CH<sub>2</sub>), 1.52-1.38 (m, 1H, CH<sub>2</sub>), 1.02 (t, *J* = 7.4 Hz, 3H, CH<sub>3</sub>).

<sup>13</sup>C NMR (CDCl<sub>3</sub>, 100 MHz): δ 143.7, 136.6, 126.5, 124.4, 118.9, 112.1, 36.8, 34.3, 27.2, 23.5, 18.9, 12.0.

HRMS (ESI, *m/z*): calcd. for C<sub>12</sub>H<sub>18</sub>N [M+H]<sup>+</sup>: 176.1434, found: 176.1434.

HPLC: Chiracel-OJH, *n*-heptane/*i*-PrOH 95:5, 0.5 mL/min., 40 °C, detection at 248 nm. Retention time (min): 11.1 (major) and 12.8 (minor).

**(S)-4-Ethyl-8-fluoro-1,2,3,4-tetrahydroquinoline (5m)**

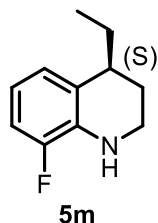

The reaction was performed with the substrate (0.2 mmol, 1 equiv.), CuTc (0.01 mmol, 5 mol%), ligand (*R,R*)-**L1** (0.012 mmol, 6 mol%), BF<sub>3</sub>·Et<sub>2</sub>O (0.4 mmol, 2 equiv.), EtMgBr (3 M in Et<sub>2</sub>O, 0.4 mmol, 2 equiv.), CH<sub>2</sub>Cl<sub>2</sub> (2.0 mL) at -78 °C for 2 h, and following **General reducing procedure**. Product **5m** was obtained as a colorless oil after column chromatography (SiO<sub>2</sub>, pentane:Et<sub>2</sub>O = 20:1) [92% conversion, 76% yield, >99% *ee*].

<sup>1</sup>H NMR (CDCl<sub>3</sub>, 400 MHz): δ 6.85-6.77 (m, 2H, CH<sub>Ar</sub>), 6.57-6.49 (m, 1H, CH<sub>Ar</sub>), 6.34 (d, *J* = 8.0 Hz, 1H, CH<sub>Ar</sub>), 4.05 (bs, 1H, NH), 3.40-3.29 (m, 2H, NHCH<sub>2</sub>), 2.75-2.65 (m, 1H, CH<sub>3</sub>CH<sub>2</sub>CH), 2.00-1.81 (m, 2H, CH<sub>2</sub>), 1.81-1.68 (m, 1H, CH<sub>2</sub>), 1.63-1.48 (m, 1H, CH<sub>2</sub>), 1.00 (t, *J* = 7.4 Hz, 3H, CH<sub>3</sub>).

<sup>13</sup>C NMR (CDCl<sub>3</sub>, 100 MHz): δ 151.0 (d, *J* = 237.2 Hz), 132.8 (d, *J* = 11.9 Hz), 127.8 (d, *J* = 3.3 Hz), 124.2 (d, *J* = 2.8 Hz), 115.2 (d, *J* = 7.4 Hz), 112.1 (d, *J* = 18.2 Hz), 37.9, 37.0 (d, *J* = 2.7 Hz), 29.2, 25.5, 11.7.

<sup>19</sup>F NMR (CDCl<sub>3</sub>, 400 MHz): δ -138.9.

HRMS (ESI, *m/z*): calcd. for C<sub>11</sub>H<sub>15</sub>NF [M+H]<sup>+</sup>: 180.1183, found: 180.1182.

HPLC: Chiracel-ODH, *n*-heptane/*i*-PrOH 98:2, 0.5 mL/min., 40 °C, detection at 243 nm. Retention time (min): 10.9 (minor) and 11.7 (major).

**(S)-4-Ethyl-8-methyl-1,2,3,4-tetrahydroquinoline (5n)**

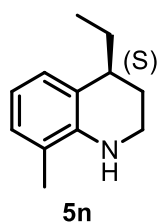

The reaction was performed with the substrate (0.2 mmol, 1 equiv.), CuTc (0.01 mmol, 5 mol%), ligand (*R,R*)-**L1** (0.012 mmol, 6 mol%), BF<sub>3</sub>·Et<sub>2</sub>O (0.6 mmol, 3 equiv.), EtMgBr (3 M in Et<sub>2</sub>O, 0.6 mmol, 3 equiv.), CH<sub>2</sub>Cl<sub>2</sub> (2.0 mL) at -78 °C for 2 h, and following **General reducing procedure**. Product **5n** was obtained as a colorless oil after column chromatography (SiO<sub>2</sub>, pentane:Et<sub>2</sub>O = 80:1) [99% conversion, C-2-addition:C-4-addition = 1:5, 73% yield, >99% *ee*].

<sup>1</sup>H NMR (CDCl<sub>3</sub>, 400 MHz): δ 6.94 (d, *J* = 7.6 Hz, 1H, CH<sub>Ar</sub>), 6.90 (d, *J* = 7.3 Hz, 1H, CH<sub>Ar</sub>), 6.90 (d, *J* = 7.3 Hz, 1H, CH<sub>Ar</sub>), 3.67 (bs, 1H, NH), 3.44-3.31 (m, 2H, NHCH<sub>2</sub>), 2.74-2.64 (m, 1H, CH<sub>3</sub>CH<sub>2</sub>CH), 2.09 (s, 3H, PhCH<sub>3</sub>), 1.99-1.70 (m, 3H, CH<sub>2</sub>), 1.62-1.49 (m, 1H, CH<sub>2</sub>), 1.00 (t, *J* = 7.4 Hz, 3H, CH<sub>3</sub>).

<sup>13</sup>C NMR (CDCl<sub>3</sub>, 100 MHz): δ 142.3, 128.0, 127.3, 125.1, 121.1, 116.1, 38.8, 37.5, 29.6, 25.6, 17.5, 11.9.

HRMS (ESI, *m/z*): calcd. for C<sub>12</sub>H<sub>18</sub>N [M+H]<sup>+</sup>: 176.1434, found: 176.1433.

HPLC: Chiracel-ODH, *n*-heptane/*i*-PrOH 95:5, 0.5 mL/min., 40 °C, detection at 244 nm. Retention time (min): 9.6 (major) and 11.1 (minor).

#### (*S*)-4-Ethyl-1,2,3,4-tetrahydrobenzo[*g*]quinoline (**5o**)

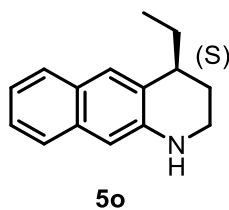

The reaction was performed with the substrate (0.2 mmol, 1 equiv.), CuTc (0.01 mmol, 5 mol%), ligand (*R,R*)-**L1** (0.012 mmol, 6 mol%), BF<sub>3</sub>·Et<sub>2</sub>O (0.6 mmol, 3 equiv.), EtMgBr (3 M in Et<sub>2</sub>O, 0.6 mmol, 3 equiv.), CH<sub>2</sub>Cl<sub>2</sub> (2.0 mL) at -78 °C for 2 h, and following **General reducing procedure**. Product **5o** was obtained as a white solid after column chromatography (SiO<sub>2</sub>, pentane:Et<sub>2</sub>O = 40:1) [96% conversion, 66% yield, 97% *ee*].

<sup>1</sup>H NMR (CDCl<sub>3</sub>, 400 MHz): δ 7.62 (d, *J* = 8.1 Hz, 1H, CH<sub>Ar</sub>), 7.54-7.46 (m, 2H, CH<sub>Ar</sub>), 7.32-7.24 (m, 1H, CH<sub>Ar</sub>), 7.17-7.10 (m, 1H, CH<sub>Ar</sub>), 6.75 (s, 1H, CH<sub>Ar</sub>), 4.17 (bs, 1H, NH), 3.47 – 3.32 (m, 2H, NHCH<sub>2</sub>), 2.91-2.82 (m, 1H, CH<sub>3</sub>CH<sub>2</sub>CH), 2.08-1.96 (m, 1H, CH<sub>2</sub>), 1.95-1.78 (m, 2H, CH<sub>2</sub>), 1.74-1.60 (m, 1H, CH<sub>2</sub>), 1.04 (t, *J* = 7.4 Hz, 3H, CH<sub>3</sub>).

<sup>13</sup>C NMR (CDCl<sub>3</sub>, 100 MHz): δ 143.3, 134.0, 128.9, 127.4, 127.4, 127.2, 125.5, 124.9, 121.4, 38.8, 38.0, 28.6, 26.0, 11.7.

HRMS (ESI, m/Z): calcd. for C<sub>15</sub>H<sub>18</sub>N [M+H]<sup>+</sup>: 212.1434, found: 212.1433.

HPLC: Chiracel-ADH, *n*-heptane/*i*-PrOH 95:5, 0.5 mL/min., 40 °C, detection at 247 nm. Retention time (min): 17.4 (major) and 20.9 (minor).

**(2*R*,4*S*)-4-Ethyl-2-methyl-1,2,3,4-tetrahydroquinoline (5p)**

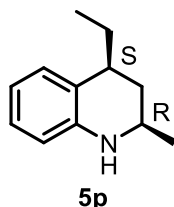

The reaction was performed with the substrate (0.2 mmol, 1 equiv.), CuTc (0.01 mmol, 5 mol%), ligand (*R,R*)-**L1** (0.012 mmol, 6 mol%), BF<sub>3</sub>·Et<sub>2</sub>O (0.4 mmol, 2 equiv.), EtMgBr (3 M in Et<sub>2</sub>O, 0.4 mmol, 2 equiv.), CH<sub>2</sub>Cl<sub>2</sub> (2.0 mL) at -78 °C for 2 h, and following **General reducing procedure**. Product **5p** was obtained as a colorless oil after column chromatography (SiO<sub>2</sub>, pentane:Et<sub>2</sub>O = 30:1) [98% conversion, 79% yield, 6:1 *dr*, 99% *ee*].

<sup>1</sup>H NMR (CDCl<sub>3</sub>, 400 MHz): δ 7.16 (dd, *J* = 7.7, 1.4 Hz, 1H, CH<sub>Ar</sub>), 7.04-6.95 (m, 1H, CH<sub>Ar</sub>), 6.72-6.60 (m, 1H, CH<sub>Ar</sub>), 6.50 (d, *J* = 8.1 Hz, 1H, CH<sub>Ar</sub>), 3.67 (bs, 1H, NH), 3.52-3.38 (m, 1H, NHCH), 2.93-2.82 (major) and 2.66-2.57 (minor) (m, 1H, CH<sub>2</sub>), 2.11-1.97 (major) and 1.89-1.82 (minor) and 1.76-1.65 (minor) (m, 2H, CH<sub>2</sub>), 1.65-1.50 (m, 1H, CH<sub>2</sub>), 1.41-1.27 (m, 1H, CH<sub>2</sub>), 1.23 (d, *J* = 6.2 Hz, 3H, CHCH<sub>3</sub>), 1.05-0.94 (m, 3H, CH<sub>2</sub>CH<sub>3</sub>).

<sup>13</sup>C NMR (CDCl<sub>3</sub>, 100 MHz): Major: δ 145.6, 127.1, 126.7, 125.2, 117.5, 114.4, 47.5, 36.8, 36.7, 27.1, 23.0, 10.7. Minor: δ 144.2, 129.7, 126.9, 125.4, 116.6, 113.9, 42.6, 37.9, 33.7, 31.0, 23.0, 12.1.

HRMS (ESI, m/Z): calcd. for C<sub>12</sub>H<sub>18</sub>N [M+H]<sup>+</sup>: 176.1434, found: 176.1433.

HPLC: Chiracel-ODH, *n*-heptane/*i*-PrOH 98:2, 0.5 mL/min., 40 °C, detection at 254 nm. Retention time of major diastereomer (min): 12.1 (major) and 12.7 (minor), retention time of minor diastereomer (min): 10.3 (minor) and 11.6 (major).

**(2*S*,4*S*)-4-ethyl-2-phenyl-1,2,3,4-tetrahydroquinoline (5q)**

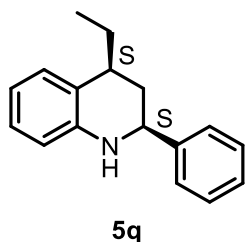

The reaction was performed with the substrate (0.2 mmol, 1 equiv.), CuTc (0.01 mmol, 5 mol%), ligand (*R,R*)-**L1** (0.012 mmol, 6 mol%), BF<sub>3</sub>·Et<sub>2</sub>O (0.6 mmol, 3 equiv.), EtMgBr (3 M in Et<sub>2</sub>O, 0.6 mmol, 3 equiv.), CH<sub>2</sub>Cl<sub>2</sub> (2.0 mL) at -78 °C for 2 h, and following **General reducing procedure**. Product **5q** was obtained as a colorless oil after column chromatography (SiO<sub>2</sub>, pentane:Et<sub>2</sub>O = 70:1) [95% conversion, 84% yield, 6:1 *dr*, 86% *ee*]. The relative configuration of **5q** was determined by NOE experiments after transforming to **5t** (see Figure S5).

<sup>1</sup>H NMR (CDCl<sub>3</sub>, 400 MHz): δ 7.50-7.30 (m, 5H, CH<sub>Ar</sub>), 7.28-7.20 (m, 1H, CH<sub>Ar</sub>), 7.11-7.00 (m, 1H, CH<sub>Ar</sub>), 6.78-6.67 (m, 1H, CH<sub>Ar</sub>), 6.56 (dd, *J* = 7.9, 1.2 Hz, 1H, CH<sub>Ar</sub>), 4.50-4.42 (m, 1H, NHCH), 4.07 (minor) and 3.97 (major) (bs, 1H, NH), 3.10-2.99 (major) and 2.73-2.65 (minor) (m, 1H, CH<sub>2</sub>), 2.26-1.92 (m, 2H, CH<sub>2</sub>), 1.88-1.69 (m, 1H, CH<sub>2</sub>), 1.69-1.53 (m, 1H, CH<sub>2</sub>), 1.06 and 0.98 (t, *J* = 7.4 Hz, 3H, CH<sub>3</sub>).

<sup>13</sup>C NMR (CDCl<sub>3</sub>, 100 MHz): Major: δ 145.6, 144.8, 128.8, 127.7, 127.2, 126.9, 126.8, 125.1, 117.8, 114.6, 57.2, 38.0, 37.4, 27.0, 10.8. Minor: δ 145.0, 144.1, 129.6, 128.7, 127.6, 127.1, 126.8, 125.2, 52.4, 37.9, 34.9, 30.7, 12.0.

HRMS (ESI, *m/z*): calcd. for C<sub>17</sub>H<sub>20</sub>N [M+H]<sup>+</sup>: 238.1590, found: 238.1590.

HPLC: Chiracel-ADH, *n*-heptane/*i*-PrOH 95:5, 0.5 mL/min., 40 °C, detection at 207 nm. Retention time of major diastereomer (min): 10.5 (minor) and 11.1 (major), retention time of minor diastereomer (min): 8.9 (major) and 12.9 (minor).

**(2*S*,4*S*)-1-(3-Bromophenyl)carbonyl-4-ethyl-2-phenyl-1,2,3,4-tetrahydroquinoline (5t)**

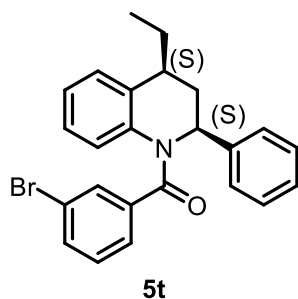

The reactions were performed according to the literature procedure.<sup>14</sup> To a solution of **5q** (75 mg, 0.316 mmol, 1 equiv.) in dry CH<sub>2</sub>Cl<sub>2</sub> (2 ml) was added benzoyl chloride (54 μL, 0.411 mmol, 1.3 equiv.) dropwise, followed by DMAP (1.9 mg, 0.016 mmol, 5 mol%) and triethylamine (57 μL, 0.411 mmol, 1.3 equiv.). The reaction mixture was stirred at RT overnight. Then it is quenched with water and extracted with CH<sub>2</sub>Cl<sub>2</sub> for three times. The combined organic phases were washed with brine, dried over MgSO<sub>4</sub>, and concentrated in vacuo to give the crude product. The major diastereomer of **5t** was obtained as a white solid after column chromatography (SiO<sub>2</sub>, pentane:Et<sub>2</sub>O = 20:1) followed by recrystallization in the mixed solvent of CH<sub>2</sub>Cl<sub>2</sub> and pentane. Relative configuration was determined by NOE experiments (see Figure S5).

<sup>1</sup>H NMR (CDCl<sub>3</sub>, 400 MHz): δ 7.35-7.31 (m, 2H, CH<sub>Ar</sub>), 7.26-7.22 (m, 1H, CH<sub>Ar</sub>), 7.22-7.17 (m, 2H, CH<sub>Ar</sub>), 7.15-7.08 (m, 4H, CH<sub>Ar</sub>), 6.95-6.87 (m, 3H, CH<sub>Ar</sub>), 6.55 (d, *J* = 7.1 Hz, 1H, CH<sub>Ar</sub>), 5.56 (t, *J* = 9.5 Hz, 1H, NHCH), 2.27 (ddd, *J* = 12.6, 8.8, 3.3 Hz, 1H, NHCHCHH), 2.65-1.58 (m, 1H, CH<sub>3</sub>CH<sub>2</sub>CH), 2.19-2.10 (m, 1H, NHCHCHH), 1.59-1.48 (m, 1H, CH<sub>3</sub>CHH), 1.38-1.29 (m, 1H, CH<sub>3</sub>CHH), 1.10 (t, *J* = 7.4 Hz, 3H, CH<sub>3</sub>).

<sup>13</sup>C NMR (CDCl<sub>3</sub>, 100 MHz): δ 168.1, 144.1, 139.2, 139.0, 138.1, 133.0, 132.1, 129.3, 128.7, 127.2, 127.1, 127.1, 126.5, 126.4, 125.9, 123.7, 122.1, 58.6, 40.9, 37.3, 23.3, 11.8.

HRMS (ESI, *m/z*): calcd. for C<sub>24</sub>H<sub>22</sub>NOBr [M+H]<sup>+</sup>: 420.0958, found: 420.0962.



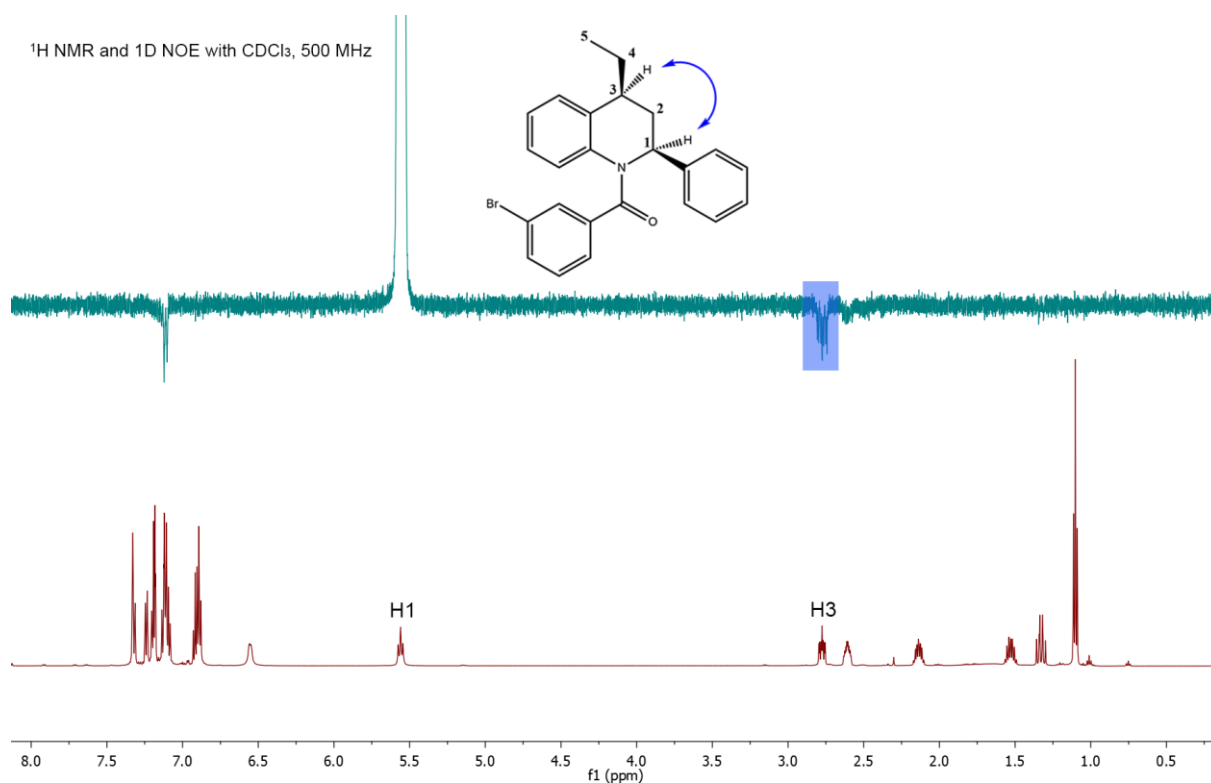

**Figure S5.** <sup>1</sup>H NMR and 1D NOE experiment of **5t**. Selective irradiation on H-1 showed NOE with H-3 (highlighted) which are positioned on the same side of the ring.

## 7. Determination of absolute configuration

The absolute configuration of **5b** was determined by X-ray single crystallography (see Figure S6), and the relative configuration of **5q** and **5t** was determined by NOE experiment (see Figure S5). The absolute configurations of other compounds were assigned by analogy.

## 8. X-ray crystallographic analysis

A single crystal of compound **5b** was mounted on top of a cryoloop and transferred into the cold nitrogen stream (100 K) of a Bruker-AXS D8 Venture diffractometer. Data collection and reduction was done using the Bruker software suite APEX3.<sup>15</sup> The final unit cell was obtained from the xyz centroids of 7072 reflections after integration. A multiscan absorption correction was applied, based on the intensities of symmetry-related reflections measured at different angular settings (SADABS). The structures were solved by direct methods using SHELXT<sup>16</sup> and refinement of the structure was performed using SHLELXL.<sup>17</sup> The hydrogen atoms were generated by geometrical considerations, constrained to idealized geometries and allowed to ride on their carrier atoms with an isotropic displacement parameter related to the equivalent displacement parameter of their carrier atoms. The

absolute configuration of the model was chosen based on anomalous dispersion. Refinement of the Flack  $x$  parameter converged 0.040(12).

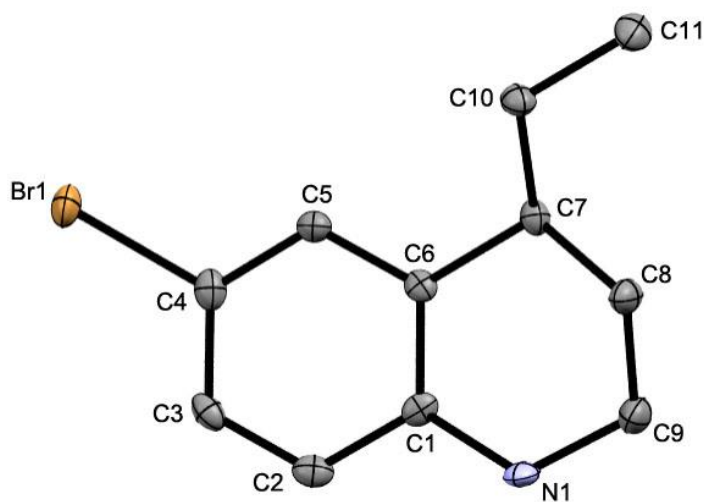

**Figure S6.** Molecular structure of compound **5b**, showing 50% probability ellipsoids. Hydrogen atoms are omitted for clarity.

**Table S6.** Crystallographic data for compound **5b**

|                                        |                                            |
|----------------------------------------|--------------------------------------------|
| chem. formula                          | C <sub>11</sub> H <sub>14</sub> BrN        |
| M <sub>r</sub>                         | 240.14                                     |
| cryst syst.                            | Monoclinic                                 |
| color, habit                           | Orange, platelet                           |
| size (mm)                              | 0.42 × 0.10 0.03                           |
| space group                            | P 21                                       |
| a (Å)                                  | 8.8938(3)                                  |
| b (Å)                                  | 5.9958(2)                                  |
| c (Å)                                  | 9.5190(3)                                  |
| α, deg                                 | 90                                         |
| β, deg                                 | 94.8830(10)                                |
| γ, deg                                 | 90                                         |
| V (Å <sup>3</sup> )                    | 505.76(3)                                  |
| Z                                      | 2                                          |
| ρ <sub>calc</sub> , g·cm <sup>-3</sup> | 1.577                                      |
| μ(Mo Kα), cm <sup>-1</sup>             | 5.129                                      |
| F(000)                                 | 244                                        |
| temp (K)                               | 100(2)                                     |
| θ range (deg)                          | 4.662 – 65.118                             |
| data collected (h,k,l)                 | -10:10, -6:7, -11:10                       |
| no. of rflns collected                 | 6932                                       |
| no. of indepnt rflns                   | 1702                                       |
| observed rflns                         | 1689 (F <sub>o</sub> ≥ 2(F <sub>σ</sub> )) |

|                         |                |
|-------------------------|----------------|
| R(F) (%)                | 1.74           |
| wR(F <sup>2</sup> ) (%) | 4.21           |
| GooF                    | 1.076          |
| Weighting a,b           | 0.0238, 0.0615 |
| params refined          | 123            |
| restraints              | 1              |
| min, max resid dens     | -0.552, 0.193  |
| Flack x                 | 0.040(12)      |

## 9. Mechanistic studies

### DFT study of the copper catalyzed addition of EtMgBr·2Et<sub>2</sub>O to 1a and 1a·BF<sub>3</sub>

To unravel the mechanism behind the presented copper catalyzed nucleophilic addition of Grignard reagents to quinolines, we first explored the blank reaction, *i.e.* the direct addition of the Grignard reagent to the quinoline. We have found that – in line with the experimental evidence- this direct addition reaction (independently of the considered regioselectivity) is not accessible at the working temperature ( $\Delta G^\ddagger_{\text{C-2-addition}} = 23.00$  kcal/mol,  $\Delta G^\ddagger_{\text{C-4-addition}} = 41.44$  kcal/mol), see Figure S7. If the LA is added to the reaction media, it will bind to the nitrogen atom decreasing the electron density of the quinoline (the charge at C-2 changes from 0.33 a.u. to 0.24 a.u. and the charge at C-4 changes from 0.44 a.u. to 0.43 a.u.) and facilitate a subsequent addition of the Grignard reagent, both at C-2 and C-4; the latter is energetically less penalized, in agreement with the experimental data presented in the manuscript.

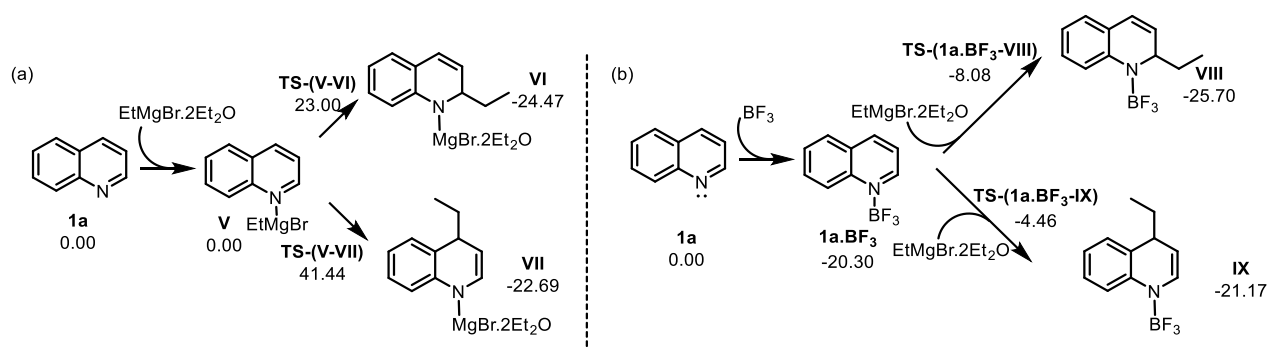

**Figure S7.** Computed mechanism for the (a) addition of EtMgBr·2Et<sub>2</sub>O to 1a. (b) addition of EtMgBr·2Et<sub>2</sub>O to the LA activated quinoline (1a·BF<sub>3</sub>). Calculations were performed at the PCM (CH<sub>2</sub>Cl<sub>2</sub>)/M06/def2svp computational level using the Gaussian 09 program. The thermochemistry was obtained at 1 atm and 195 K. Short names have been used, but all the presented systems contain two Et<sub>2</sub>O molecules except for BF<sub>3</sub> and quinoline, this information is omitted for clarity.

**Table S7.** Summary of the energies for the study of the blank reaction and the blank reaction with BF<sub>3</sub> in the addition of the Grignard reagent to quinoline

| ID                                 | ImFreqs  | Stable | SCF <sup>a</sup> | SCF+ZPVE     | H <sup>b</sup> | G <sup>c</sup> |
|------------------------------------|----------|--------|------------------|--------------|----------------|----------------|
| <b>1a</b>                          | –        | Yes    | –401.3167684     | –401.181547  | –401.17791     | –401.200117    |
| <b>V</b>                           | –        | Yes    | –3720.911052     | –3720.435202 | –3720.419991   | –3720.468347   |
| <b>TS-(V-VI)</b>                   | –404.649 | Yes    | –3720.876478     | –3720.400663 | –3720.386453   | –3720.431694   |
| <b>VI</b>                          | –        | Yes    | –3487.268379     | –3487.258404 | –3487.257786   | –3487.296207   |
| <b>TS-(V-VII)</b>                  | –412.972 | Yes    | –3720.847843     | –3720.371393 | –3720.357214   | –3720.402308   |
| <b>VII</b>                         | –        | Yes    | –3720.94771      | –3720.469152 | –3720.454362   | –3720.502078   |
| <b>BF<sub>3</sub></b>              | –        | Yes    | –324.2164826     | –324.203888  | –324.201265    | –324.219811    |
| <b>1a·BF<sub>3</sub></b>           | –        | Yes    | –725.5809442     | –725.430379  | –725.424745    | –725.452271    |
| <b>TS-(1a·BF<sub>3</sub>-VIII)</b> | –381.532 | Yes    | –4045.14233      | –4044.650201 | –4044.634257   | –4044.682723   |
| <b>VIII</b>                        | –        | Yes    | –4045.22728      | –4044.733319 | –4044.71804    | –4044.765589   |
| <b>TS-(1a·BF<sub>3</sub>-IX)</b>   | –510.418 | Yes    | –4045.135857     | –4044.643974 | –4044.62797    | –4044.676943   |
| <b>IX</b>                          | –        | Yes    | –3811.900283     | –3811.542546 | –3811.530313   | –3811.57177    |

<sup>a</sup>Energies are expressed in a.u. and the imaginary frequencies in cm<sup>–1</sup>. <sup>b</sup>H represents enthalpies. <sup>c</sup>G Represents Gibbs free Energies.

At this point, we wondered whether copper could also behave as a LA and compete with the BF<sub>3</sub> for binding to the nitrogen atom of **1a**, or if the BF<sub>3</sub> could be engaged in the coordination of any other species present in the reaction. Thus, we performed a systematic exploration of all the potential coordination of BF<sub>3</sub> and **L1-CuBr** with **1a** (Figure S8). This study reveals that even **L1-CuBr** can behave as a LA and coordinate the quinoline, as expected BF<sub>3</sub> leads to a more thermodynamically stable species thus displacing the copper in case complex **X** or **XI** were formed in solution. We also explored potential coordination of BF<sub>3</sub> with the **L1**. We have found that even BF<sub>3</sub> can coordinate **L1**, this coordination leads to a complex that is thermodynamically less stable than that resulting from its coordination to the **1a** (**1a·BF<sub>3</sub>**) or that resulting from the coordination of **L1** with the copper source, as we detailed below (Figure S8). This is also in agreement with the NMR studies (Figures S15-16).

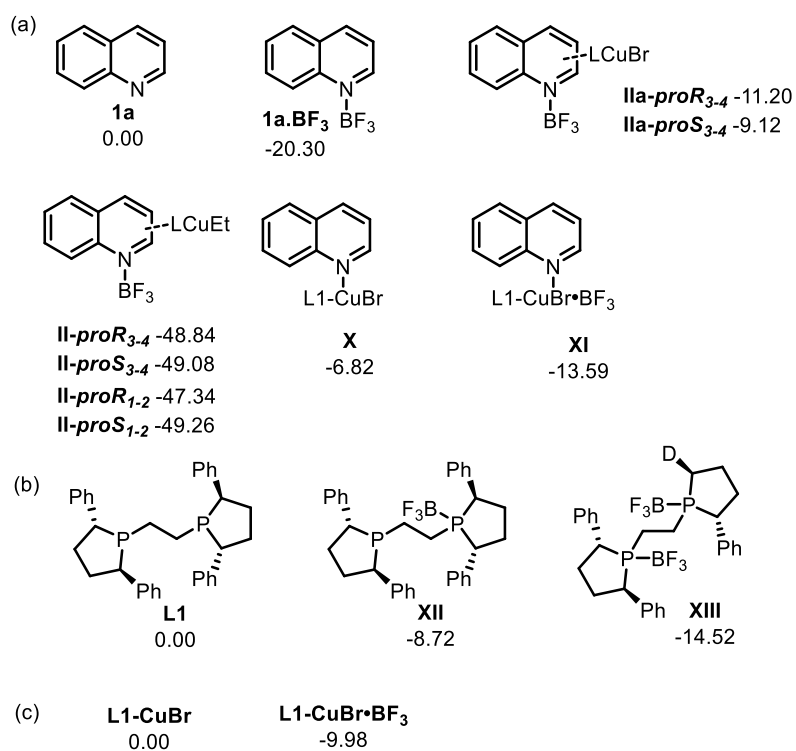

**Figure S8.** Computed relative stability of the coordination of  $\text{BF}_3$  to the different species participating in the reaction. Calculations were performed at the PCM ( $\text{CH}_2\text{Cl}_2$ )/M06/def2svp computational level using the Gaussian 09 program. The thermochemistry was obtained at 1 atm and 195 K.

**Table S8.** Summary of the energies for the study of the interaction of  $\text{BF}_3$  with the different components of the catalytic system presented. All calculations were performed with the (*R,R*)-**L1** ligand.

| ID                            | ImFreqs | Stable | SCF <sup>a</sup> | SCF+ZPVE     | H <sup>b</sup> | G <sup>c</sup> |
|-------------------------------|---------|--------|------------------|--------------|----------------|----------------|
| <b>1a</b>                     | –       | Yes    | –401.3167684     | –401.181547  | –401.17791     | –401.200117    |
| <b>1a·BF<sub>3</sub></b>      | –       | Yes    | –725.5809442     | –725.430379  | –725.424745    | –725.452271    |
| <b>IIa-proR<sub>3,4</sub></b> | –       | Yes    | –6937.441863     | –6936.68338  | –6936.660362   | –6936.72743    |
| <b>IIa-proS<sub>3,4</sub></b> | –       | Yes    | –6937.438924     | –6936.680365 | –6936.657475   | –6936.724125   |
| <b>II-proR<sub>3,4</sub></b>  | –       | Yes    | –4442.685582     | –4441.864414 | –4441.841144   | –4441.907423   |
| <b>II-proS<sub>3,4</sub></b>  | –       | Yes    | –4442.684883     | –4441.863422 | –4441.840268   | –4441.906948   |
| <b>II-proR<sub>1,2</sub></b>  | –       | Yes    | –4442.682289     | –4441.86133  | –4441.810951   | –4441.945899   |
| <b>II-proS<sub>1,2</sub></b>  | –       | Yes    | –4442.683702     | –4441.863418 | –4441.812692   | –4441.948965   |
| <b>X</b>                      | –       | Yes    | –6613.203409     | –6612.459973 | –6612.439187   | –6612.500643   |
| <b>XI</b>                     | –       | Yes    | –6937.445992     | –6936.688835 | –6936.666203   | –6936.731244   |
| <b>L1</b>                     | –       | Yes    | –1997.721791     | –1997.11694  | –1997.101947   | –1997.151917   |
| <b>XII</b>                    | –       | Yes    | –2321.967603     | –2321.348094 | –2321.330934   | –2321.385628   |
| <b>XIII</b>                   | –       | Yes    | –2646.21189      | –2645.57695  | –2645.558094   | –2645.61468    |
| <b>L1-CuBr</b>                | –       | Yes    | –6211.843657     | –6211.236732 | –6211.219631   | –6211.274031   |
| <b>L1-CuBr·BF<sub>3</sub></b> | –       | Yes    | –6536.091876     | –6535.470998 | –6535.451685   | –6535.50974    |

<sup>a</sup>Energies are expressed in a.u. and the imaginary frequencies in  $\text{cm}^{-1}$ . <sup>b</sup>H represents enthalpies. <sup>c</sup>G Represents Gibbs free Energies.

Once we have identified the role of the LA as well as its preferred disposition in the system, we moved to the study of the speciation of the copper source in the reaction. With this goal and taking into consideration that copper(I) is known for forming dimeric species and other aggregates in solution, we performed a systematic analysis on the relative stability of some of the copper species that might be present in the reaction media (Figure S9).

We have found that once the copper source interacts with **L1** it evolves towards the formation of the complex **L1-CuBr** ( $\Delta G = -20.91$  kcal/mol). This complex can further progress towards the formation of dimeric species and even transmetalate in the presence of the Grignard reagent (Figure S9). The formation of dimeric species is energetically favourable, nonetheless we have disregarded them as potential catalyst for two reasons: a) the dilution degree in which the copper species is present in the reaction media and b) when the dimeric species are allowed to interact with the organic substrate they break towards their monomeric constituents.

The **L1-CuBr** complex can alternatively evolve through a direct transmetalation leading to **L1-CuEt**, or **I**, this species is not only thermodynamically preferred ( $-32.70$  kcal/mol) but also key for the evolution of the catalysed reaction, as we present in the main text.

Next we explored the possibility of species **I** further interacting with the Grignard reagent via a second transmetallation resulting in the formation of a cuprate species. We have found that the formation of cuprates is highly endergonic and consequently unfeasible in the working conditions used in this protocol.

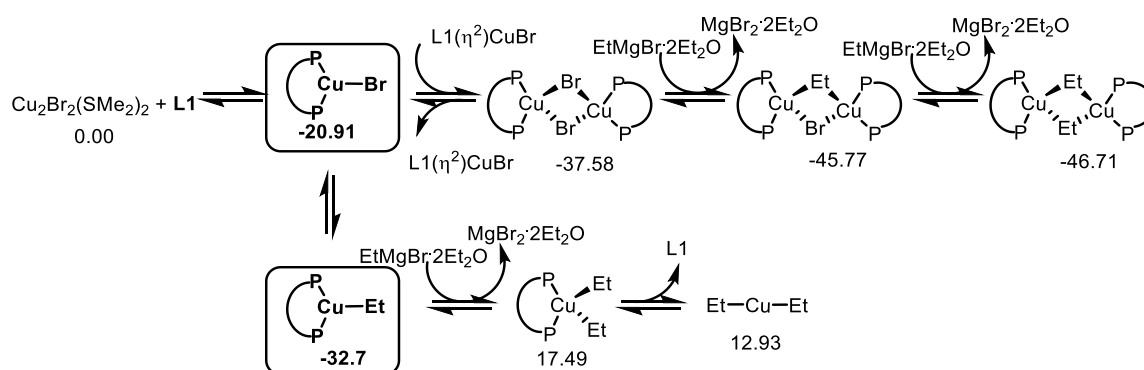

**Figure S9.** Computed relative energies for the potential copper species present in the reaction media. The calculations were performed at the PCM(CH<sub>2</sub>Cl<sub>2</sub>)/M06/def2svp computational level using the Gaussian 09 program. The thermochemistry was obtained at 1 atm and 195 K. **L1** has been represented as a curved line to clarify that it behaves as a chelating agent.

**Table S9.** Summary of the energies for the study of the copper speciation in solution.

| ID                                                                | Im. Freqs. | Stable | SCF <sup>a</sup> | SCF+ZPVE      | H <sup>b</sup> | G <sup>c</sup> |
|-------------------------------------------------------------------|------------|--------|------------------|---------------|----------------|----------------|
| <b>Cu<sub>2</sub>Br<sub>2</sub>·(SMe<sub>2</sub>)<sub>2</sub></b> | –          | Yes    | –9383.671745     | –9383.517717  | –9383.506351   | –9383.548312   |
| <b>L1-CuBr</b>                                                    | –          | Yes    | –6211.843657     | –6211.236732  | –6211.219631   | –6211.274031   |
| <b>L1<sub>2</sub>Cu<sub>2</sub>Br<sub>2</sub></b>                 | –          | Yes    | –12423.732710    | –12422.517483 | –12422.483079  | –12422.574618  |
| <b>L1<sub>2</sub>Cu<sub>2</sub>BrEt</b>                           | –          | Yes    | –9928.977519     | –9927.699335  | –9927.664871   | –9927.754807   |
| <b>L1<sub>2</sub>Cu<sub>2</sub>Et<sub>2</sub></b>                 | –          | Yes    | –7434.206748     | –7432.867065  | –7432.831901   | –7432.923431   |
| <b>L1-CuEt</b>                                                    | –          | Yes    | –3717.080114     | –3716.411863  | –3716.393885   | –3716.450532   |
| <b>L1-CuEt<sub>2</sub></b>                                        | –          | Yes    | –3796.216569     | –3795.485075  | –3795.465794   | –3795.523754   |
| <b>CuEt<sub>2</sub></b>                                           | –          | Yes    | –1798.483889     | –1798.359603  | –1798.354567   | –1798.379112   |

<sup>a</sup>Energies are expressed in a.u. and the imaginary frequencies in cm<sup>-1</sup>. <sup>b</sup>H represents enthalpies. <sup>c</sup>G Represents Gibbs free Energies.

We then proceed with the exploration of the copper(I) catalysed reaction of the quinoline with the Grignard in the presence of the BF<sub>3</sub> as a LA, as described in the main text.

During the mechanistic exploration we also explored the potential evolution of **II**<sub>3,4</sub> through a C-2-addition. Unfortunately, all our attempts to locate the transition state connecting **II**<sub>3,4</sub> and **III**<sub>1,2</sub> were unfruitful. In order to provide an estimation for the energy of **TS-(II<sub>3,4</sub>-III)-R<sub>1,2</sub>** and **TS-(II<sub>3,4</sub>-III)-S<sub>1,2</sub>**,

we explored the potential energy surface via a scan of the electronic energy variation with the elongation of the bond C-2-Et at **III**<sub>1,2</sub> (see Figure S10).

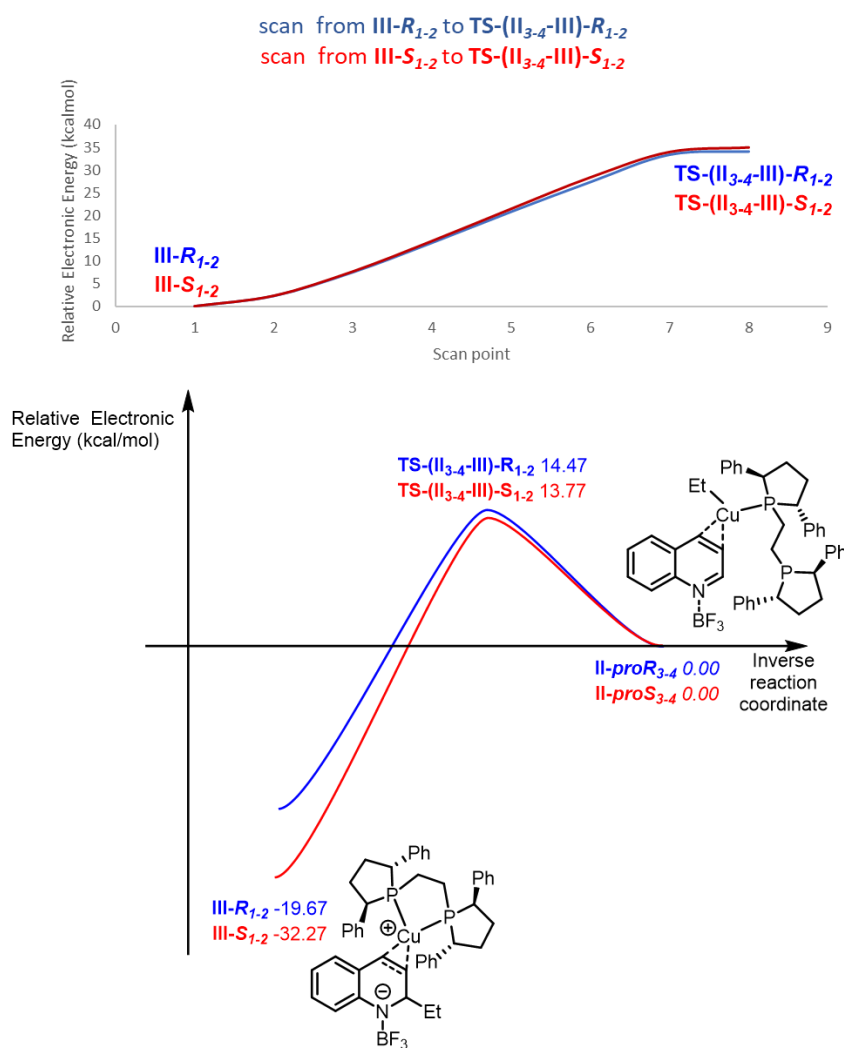

**Figure S10.** Representation of the energy scan (top) and reaction profile (bottom) obtained through the evaluation of the energy penalty associated with the addition of the Grignard reagent to **III**<sub>3,4</sub> at C-2. The energies reported correspond to electronic energies. The scan point corresponds to each of the steps of the scan, the step size selected was 0.1 Å, the initial C-C bond distance is 1.54 Å and the ending one 2.34 Å.

Moreover, we explored the possibility of a direct decoordination of the copper complex in **III**<sub>3,4</sub> yielding directly the product while creating a highly electrophilic copper species (**IIIa**), naturally we found that the formation of such an ionic pair is energetically unfeasible (see Figure S11). Alternatively, we also explored the possibility of **III**<sub>3,4</sub> to evolve via a structural reorganization that would involve the coordination of the copper at the nitrogen with the concomitant release of BF<sub>3</sub>. We



have found that the formation of **III<sub>b</sub>** is too endothermic and thus it is unlikely that this species will be present in solution.

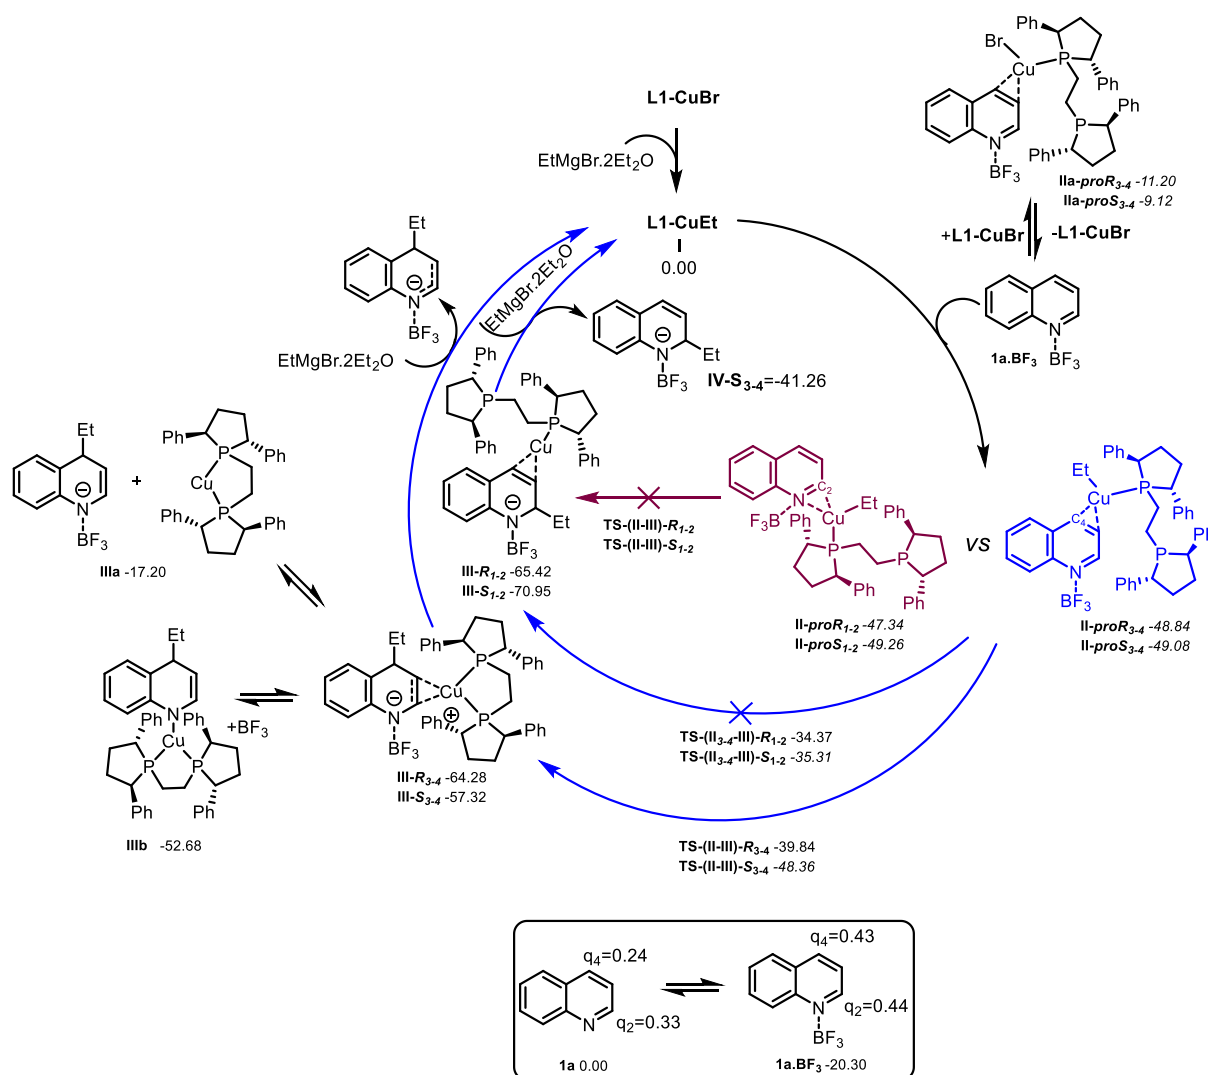

**Figure S11.** Computed potential reaction paths for the copper catalyzed addition of EtMgBr·2Et<sub>2</sub>O to quinoline in the presence of a LA. Calculations were performed at the PCM (CH<sub>2</sub>Cl<sub>2</sub>)/M06/def2svp computational level using the Gaussian 09 program. The thermochemistry was obtained at 1 atm and 195 K.

**Table S10.** Summary of the energies for the study of the Computed mechanism for the copper catalyzed addition of EtMgBr·2Et<sub>2</sub>O to quinoline in the presence of a LA.<sup>a</sup>

| ID                                 | ImFreqs | Stable | SCF          | SCF+ZPVE     | H            | G            |
|------------------------------------|---------|--------|--------------|--------------|--------------|--------------|
| <b>L1-CuBr</b>                     | –       | Yes    | –6211.843657 | –6211.236732 | –6211.219631 | –6211.274031 |
| <b>EtMgBr·2Et<sub>2</sub>O</b>     | –       | Yes    | –3320.18153  | –3319.840154 | –3319.81692  | –3319.893004 |
| <b>L1-CuEt</b>                     | –       | Yes    | –3717.080114 | –3716.411863 | –3716.393885 | –3716.450532 |
| <b>1a·BF<sub>3</sub></b>           | –       | Yes    | –725.5809442 | –725.430379  | –725.424745  | –725.452271  |
| <b>IIa-proR<sub>3-4</sub></b>      | –       | Yes    | –6937.441863 | –6936.68338  | –6936.660362 | –6936.72743  |
| <b>IIa-proS<sub>3-4</sub></b>      | –       | Yes    | –6937.438924 | –6936.680365 | –6936.657475 | –6936.724125 |
| <b>II-proR<sub>1-2</sub></b>       | –       | Yes    | –4442.683702 | –4441.863418 | –4441.812692 | –4441.948965 |
| <b>II-proS<sub>1-2</sub></b>       | –       | Yes    | –4442.682289 | –4441.86133  | –4441.810951 | –4441.945899 |
| <b>II-proR<sub>3-4</sub></b>       | –       | Yes    | –4442.685582 | –4441.864414 | –4441.841144 | –4441.907423 |
| <b>II-proS<sub>3-4</sub></b>       | –       | Yes    | –4442.684883 | –4441.863422 | –4441.840268 | –4441.906948 |
| <b>TS-(II-III)-R<sub>3-4</sub></b> | –300.38 | Yes    | –4442.673217 | –4441.851763 | –4441.802325 | –4441.933955 |
| <b>TS-(II-III)-S<sub>3-4</sub></b> | –318.93 | Yes    | –4442.683985 | –4441.863683 | –4441.813757 | –4441.947534 |
| <b>III-R<sub>3-4</sub></b>         | –       | Yes    | –4442.744373 | –4441.920167 | –4441.897521 | –4441.9618   |
| <b>III-S<sub>3-4</sub></b>         | –       | Yes    | –4442.755128 | –4441.930912 | –4441.908182 | –4441.972896 |
| <b>III-R<sub>1-2</sub></b>         | –       | Yes    | –4442.71626  | –4441.891792 | –4441.842248 | –4441.974708 |
| <b>III-S<sub>1-2</sub></b>         | –       | Yes    | –4442.736311 | –4441.911465 | –4441.88894  | –4441.952942 |
| <b>III<sub>a</sub></b>             | –       | Yes    | –804.7923851 | –804.577264  | –804.57015   | –804.600866  |
| <b>III<sub>b</sub></b>             | –       | Yes    | –4118.464794 | –4117.656681 | –4117.611087 | –4117.735868 |
| <b>IV-S<sub>3-4</sub></b>          | –       | Yes    | –804.7923853 | –804.577273  | –804.570153  | –804.600902  |

<sup>a</sup>Energies are expressed in a.u. and the imaginary frequencies in cm<sup>–1</sup>. <sup>b</sup>H represents enthalpies. <sup>c</sup>G Represents Gibbs free Energies.

### Scans of the variation of the energy with the reaction coordinate from **II-proR<sub>3-4</sub>** to **TS-(II-III)-R<sub>3-4</sub>**

Due to the difficulties found when trying to locate **TS-(II-III)-R<sub>1-2</sub>** and **TS-(II-III)-S<sub>1-2</sub>**, we decided to explore the potential energy surface in the region of the reaction coordinate. To do so, we first confirmed in **TS-(II-III)-R<sub>3-4</sub>** that the bending of C-4-Cu-Et is the main contributor to the energy penalization of the transition state (barrier from scan = 13.23, computed barrier = 9 kcal/mol), we chose this diastereomer and not the **II-proS<sub>3-4</sub>** one because it shows a higher barrier and thus it provides a clearer scan (see Figure S12).

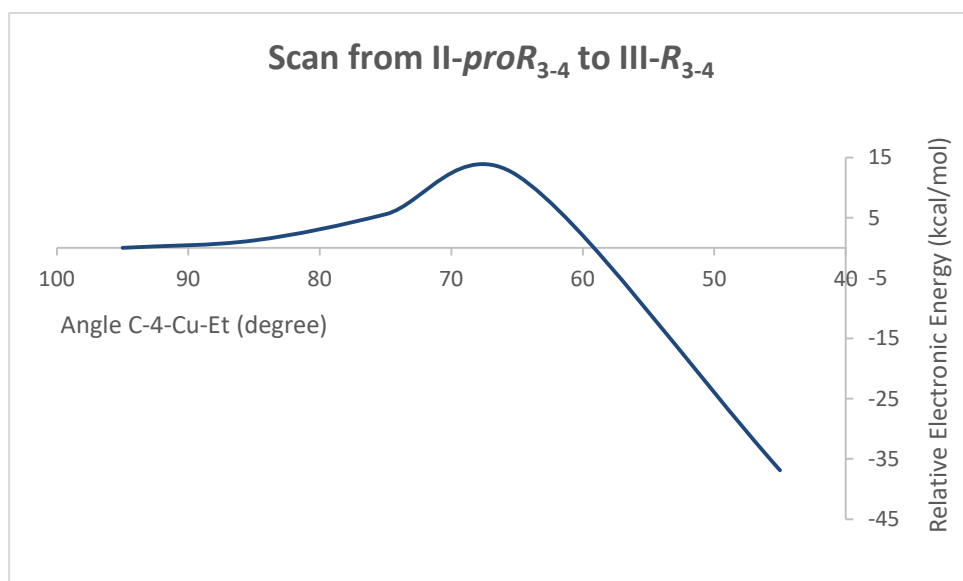

**Figure S12.** Computed energy profile for the formation of **III-*R*<sub>3.4</sub>** from **II-*proR*<sub>3.4</sub>**. The represented energies correspond to pure electronic energies. Calculations were performed at the PCM (CH<sub>2</sub>Cl<sub>2</sub>)/M06/def2svp computational level using the Gaussian 09 program. The scan step chosen is 10°.

Encouraged with these results we performed an analogous study for localizing **TS-(II-III)-*R*<sub>1.2</sub>** obtaining, as it was described in the main text, that the variation of this internal coordinate leads to the disaggregation of the complex and the formation of an alternative one in which the **L1-CuEt** complex is establishing a weak interaction with C-3-C-4. This reveals that **II-*proR*<sub>1.2</sub>** will not evolve via a C-2-addition but through a disaggregation of the complex and the formation of a new species **IIb-*proR*<sub>1.2</sub>** in which the copper is already sitting at C-3-C-4 thus predisposing the system to further progress via the formation of **II-*R*<sub>3.4</sub>**.

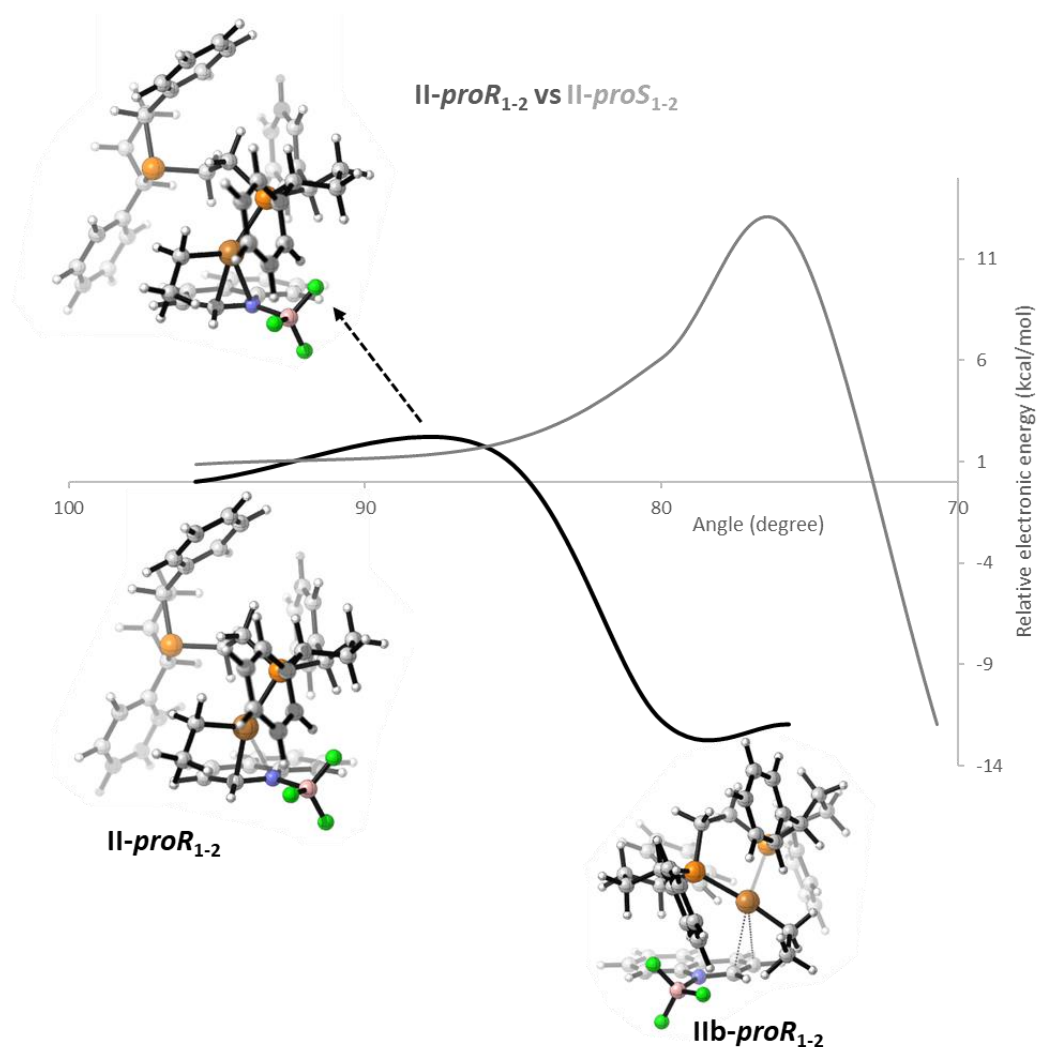

**Figure S13.** Scan of the internal coordinate C-2-Cu-Et at **II-1,2**. The represented energies correspond to pure electronic energies. Calculations were performed at the PCM (CH<sub>2</sub>Cl<sub>2</sub>)/M06/def2svp computational level using the Gaussian 09 program. The scan step chosen is 10°. We have used black lines to represent the energy evolution of **II-proR<sub>1,2</sub>** and grey lines to represent the energy evolution of **II-proS<sub>1,2</sub>**. Notice that we have used the mirror image of the compound **IIb-proR<sub>1,2</sub>** for visualization purposes.

#### **IRC obtained for TS-(II-III)-R<sub>3,4</sub>**

To rationalize the sensitivity of the reaction to the substituents at position C-3 but not to substituents at C-4 we have followed the intrinsic reaction coordinate (IRC) from **TS-(II-III)-R<sub>3,4</sub>**. The IRC shows that once the transition state structure is met and the delivery of the *Et* group initiated, the **L1/Cu(I)** moiety starts relocating towards C-3 and it is not until the very end of the IRC that the relocation of the copper center towards C-4 is happening. As a result, the latter chemical event barely contributes to

the energy of the reaction whereas the relocation to C-3 has a sound effect on the energy of this TS, as a result if the access to that position is impeded the energy penalization for this reaction is going to be increased (Figure S14).

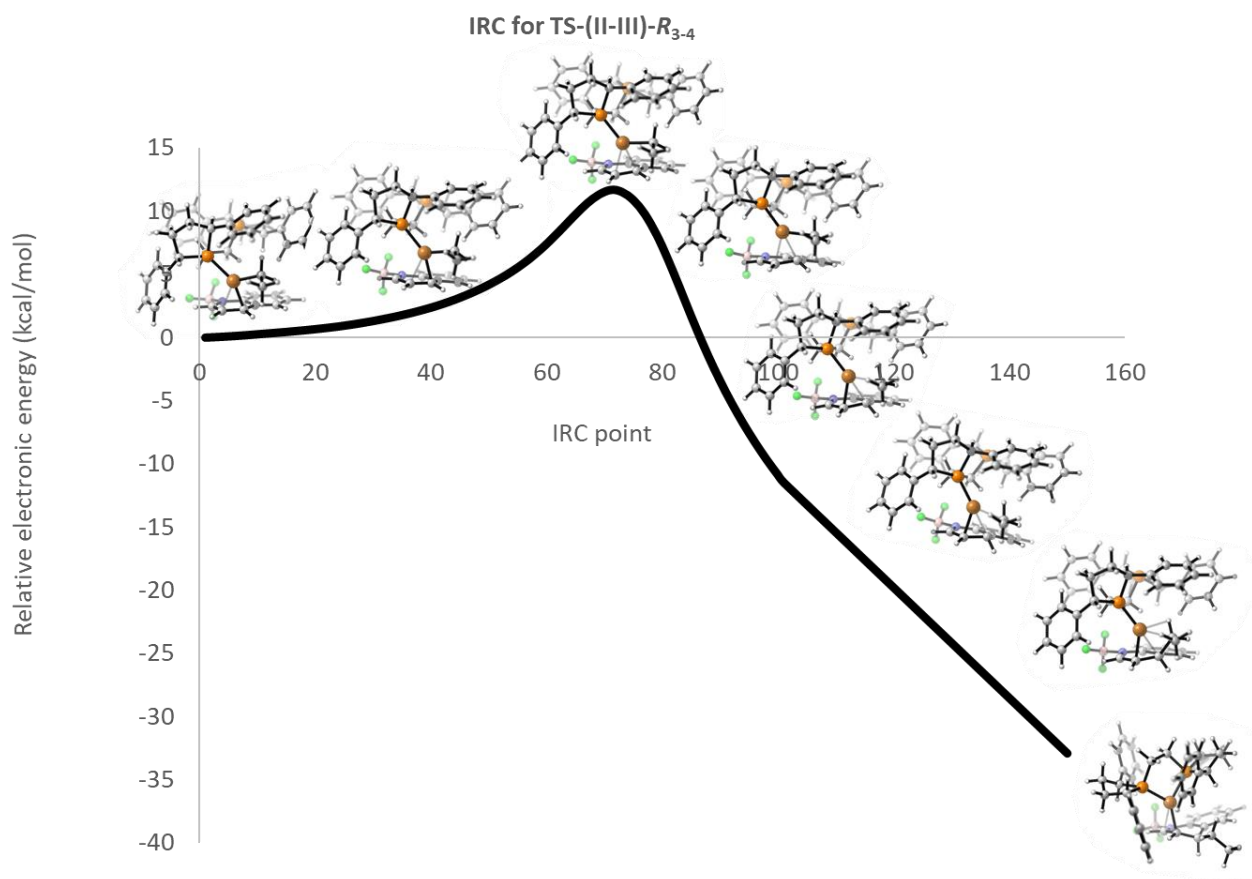

**Figure S14.** IRC obtained for **TS-(II-III)-R<sub>3-4</sub>**. The represented energies correspond to pure electronic energies. Calculations were performed at the PCM (CH<sub>2</sub>Cl<sub>2</sub>)/M06/def2svp computational level using the Gaussian 09 program. Notice that for visualization purposes we have represented the mirror images of the compounds.

### NMR experiments

NMR experiments were carried out in order to detect possible species formed in the reaction. NMR studies were performed with 2-methyl-quinoline in combination with BF<sub>3</sub>·Et<sub>2</sub>O, with CuBr·SMe<sub>2</sub> and with BF<sub>3</sub>·Et<sub>2</sub>O and **L4**-CuBr. Accordingly 3 different species were detected: 1) 2-methyl-quinoline/BF<sub>3</sub>; 2) 2-methyl-quinoline/**L4**-CuBr; 3) 2-methyl-quinoline/BF<sub>3</sub>/**L4**-CuBr. For the latter species we assume that Cu(I) complex binds to C-3-C-4 position of 2-methyl-quinoline, however we don't have a strong NMR evidence for this. All the attempts to detect species with 2-methyl-

quinoline/BF<sub>3</sub>/L4-CuBr/RMgBr were not successful due the immediate addition product formation upon mixing all the reagents together.

Below one can find the overlapped spectra, separate spectra with assignments and procedures for the preparation of the species.

### Overlapped spectra

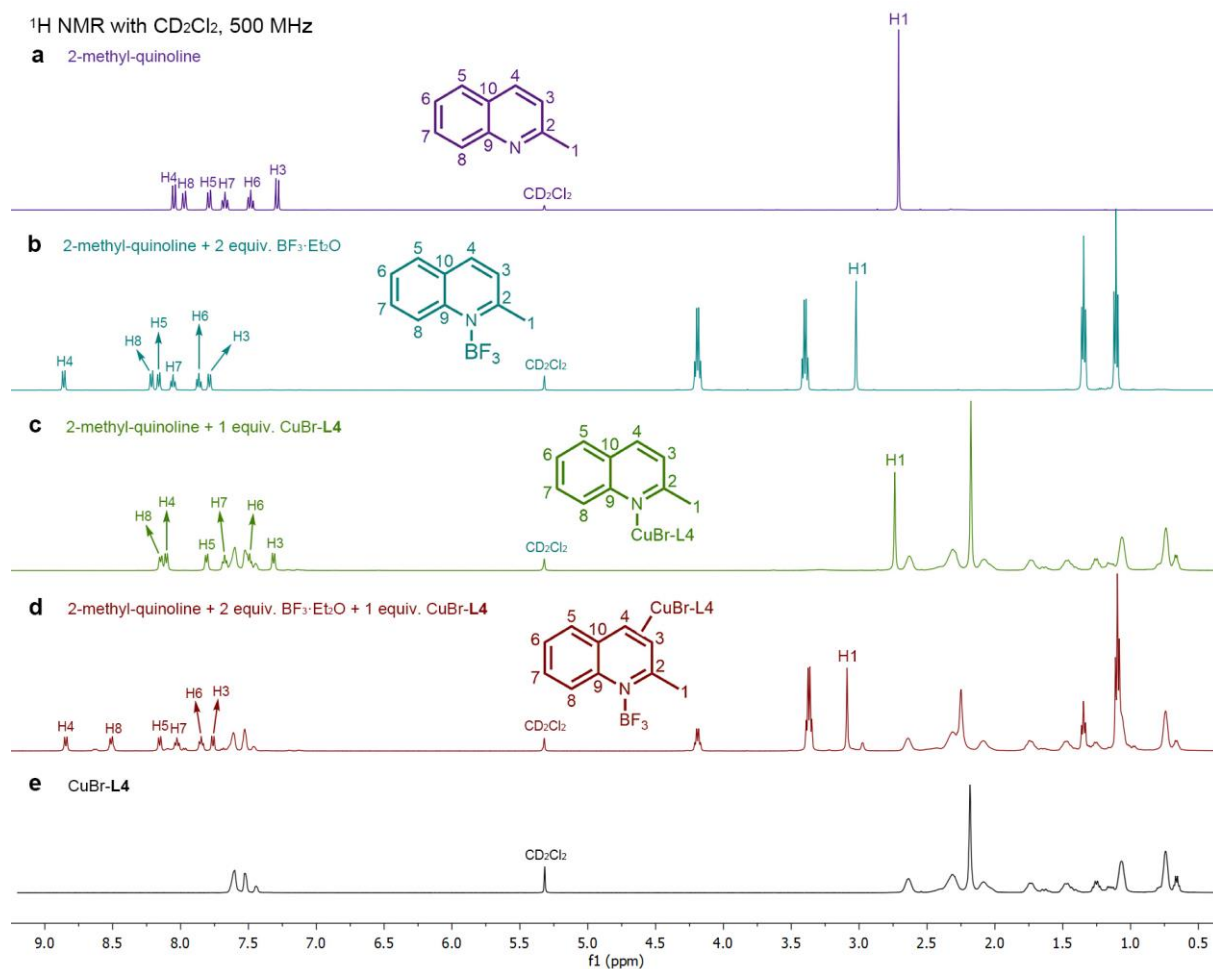

**Figure S15.** NMR studies performed to evaluate the interaction of 2-Me-quinoline with BF<sub>3</sub>·Et<sub>2</sub>O, L4-CuBr and both of them. (a) <sup>1</sup>H-NMR spectra of 2-methyl-quinoline. (b) <sup>1</sup>H-NMR spectra of the 2-methyl-quinoline with 2 equiv. of BF<sub>3</sub>·Et<sub>2</sub>O. (c) <sup>1</sup>H-NMR spectra of the 2-methyl-quinoline with 1 equiv. of L4-CuBr. (d) <sup>1</sup>H-NMR spectra of the 2-Me-quinoline with 1 equiv of L4-CuBr and 2 equiv. of BF<sub>3</sub>·Et<sub>2</sub>O. (e) <sup>1</sup>H-NMR spectra of L4-CuBr.

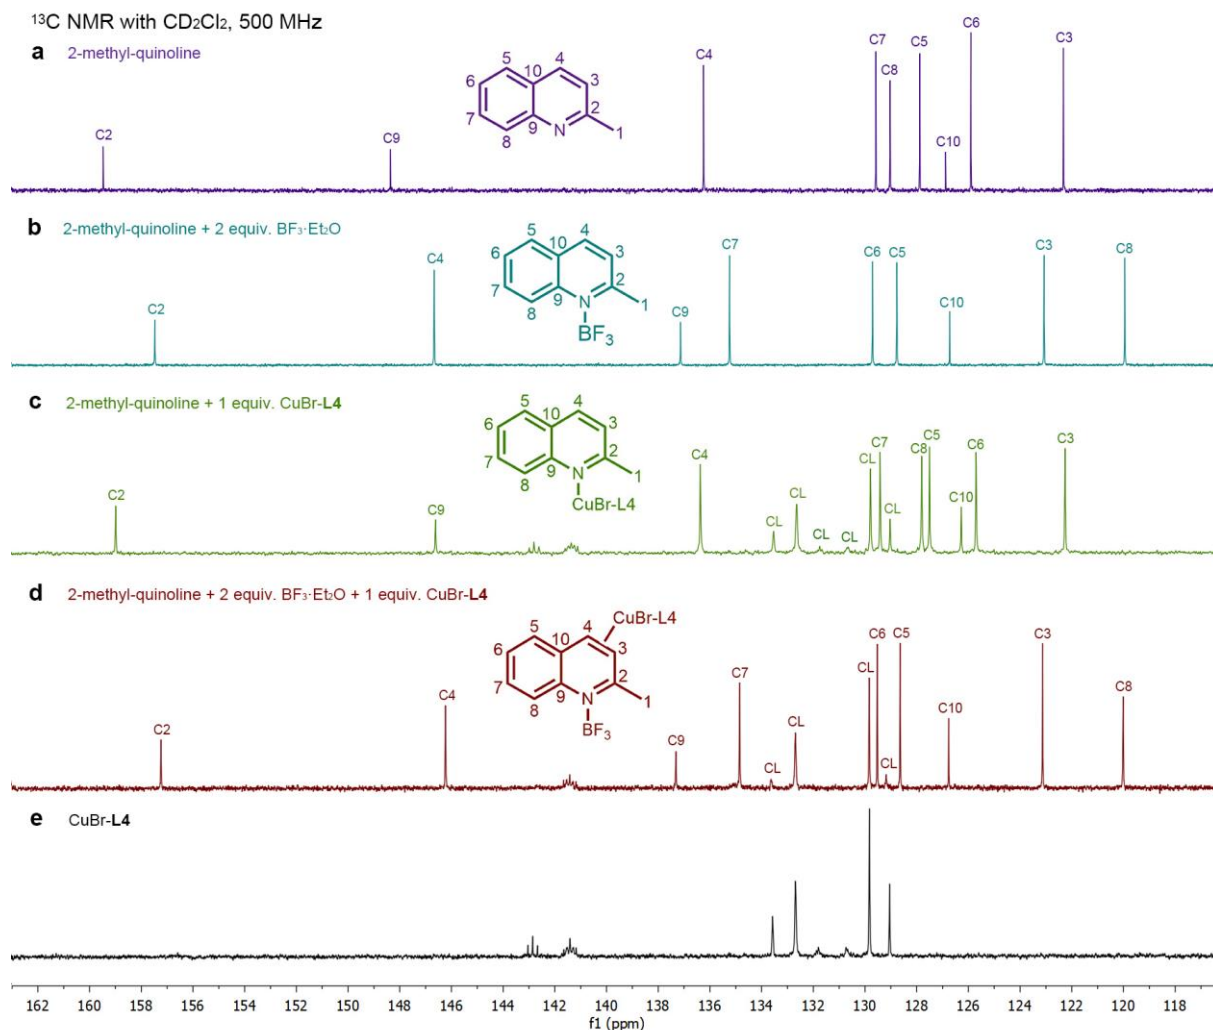

**Figure S16.** Amplified aromatic part of <sup>13</sup>C NMR spectra in the range of 118-162 ppm to evaluate the interaction of 2-Me-quinoline with BF<sub>3</sub>·Et<sub>2</sub>O, L4-CuBr and both of them (for full spectra, see below). (a) <sup>13</sup>C-NMR spectra of 2-methyl-quinoline. (b) <sup>13</sup>C-NMR spectra of the 2-Me-quinoline with 2 equiv of BF<sub>3</sub>·Et<sub>2</sub>O. (c) <sup>13</sup>C-NMR spectra of the 2-methyl-quinoline with 1 equiv of L4-CuBr. (d) <sup>13</sup>C-NMR spectra of the 2-methyl-quinoline with 1 equiv. of L4-CuBr and 2 equiv. of BF<sub>3</sub>·Et<sub>2</sub>O. (e) <sup>13</sup>C-NMR spectra of L4-CuBr.

### Full assignments of all the peaks

#### 2-methyl-quinoline

2-methyl-quinoline was dissolved in CD<sub>2</sub>Cl<sub>2</sub> in a dry NMR tube at -50 °C under N<sub>2</sub> atmosphere and measured by NMR spectroscopy at -50 °C. Full characterization was carried out by <sup>1</sup>H NMR (Figure S17), <sup>13</sup>C NMR (Figure S18), <sup>1</sup>H-<sup>13</sup>C-HSQCED (Figure S19) and <sup>1</sup>H-<sup>13</sup>C-HMBC (Figure S20).

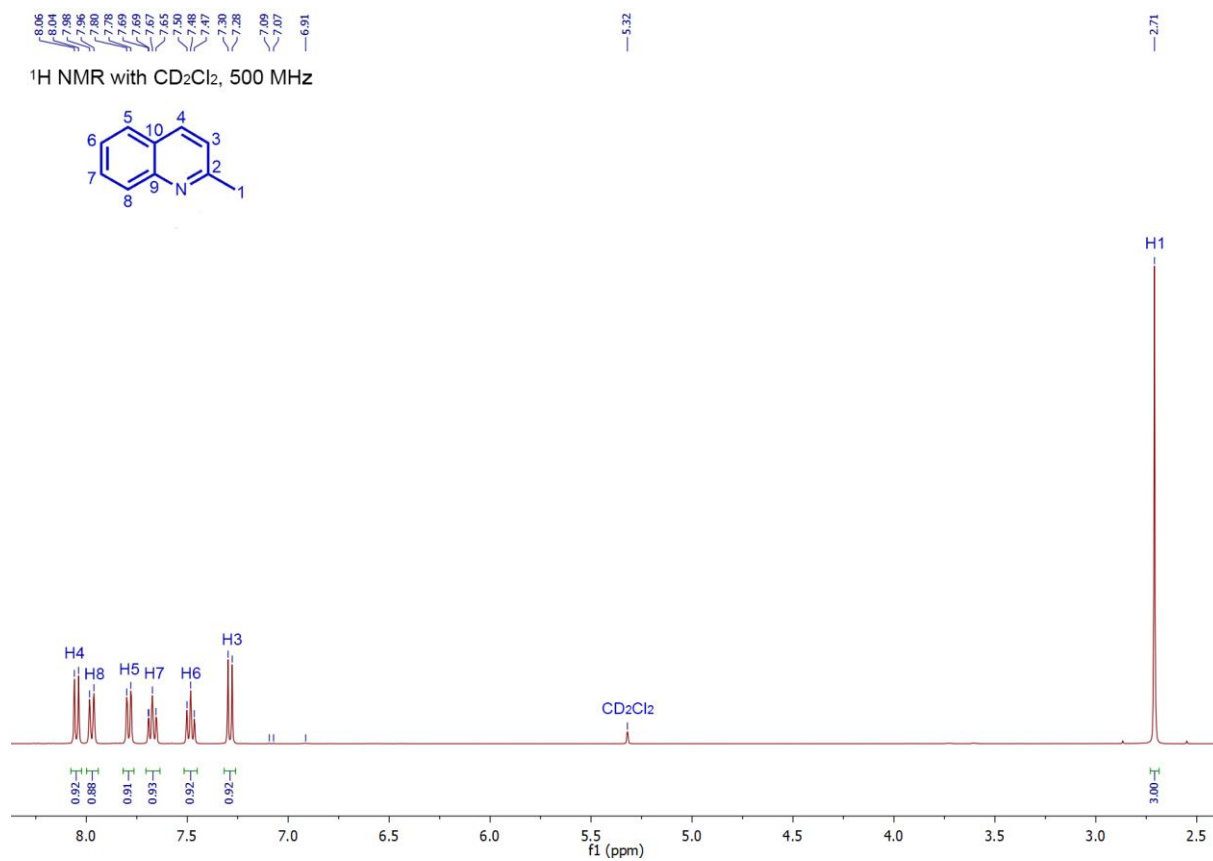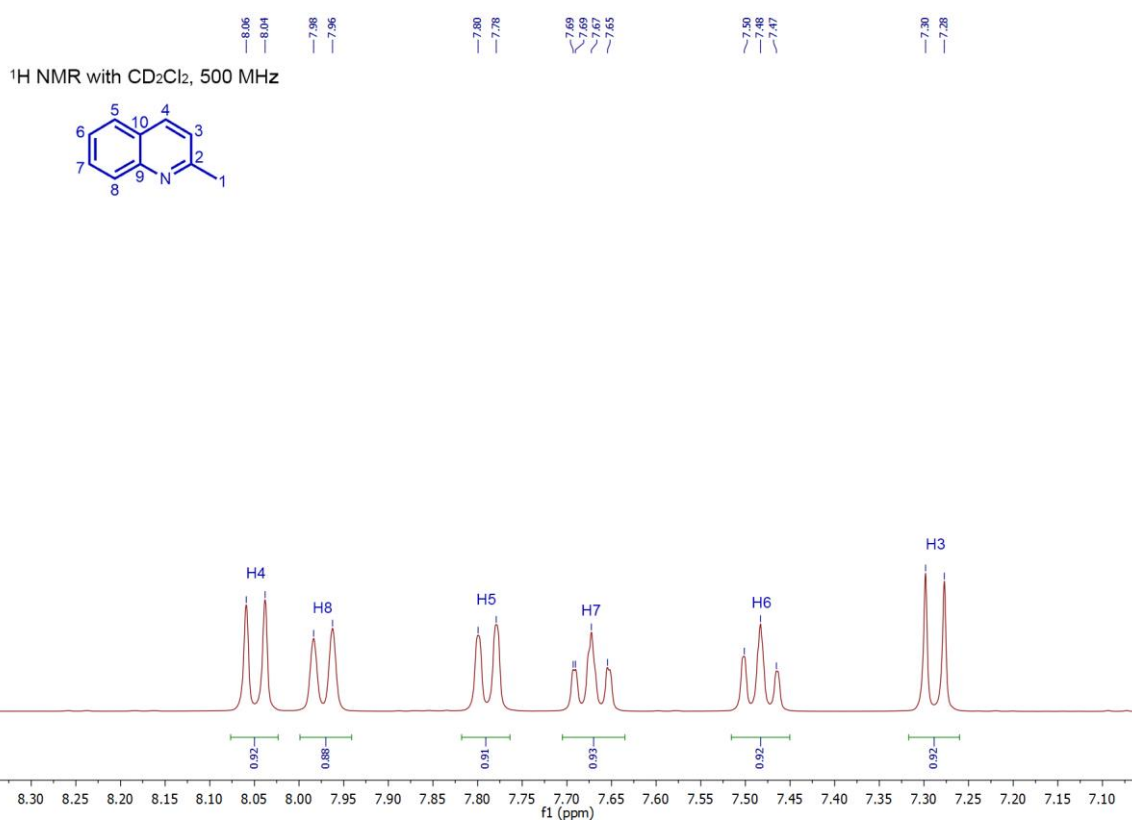

**Figure S17.** <sup>1</sup>H NMR spectrum of 2-methylquinoline (top) and amplified aromatic part of <sup>1</sup>H NMR spectra (bottom) .



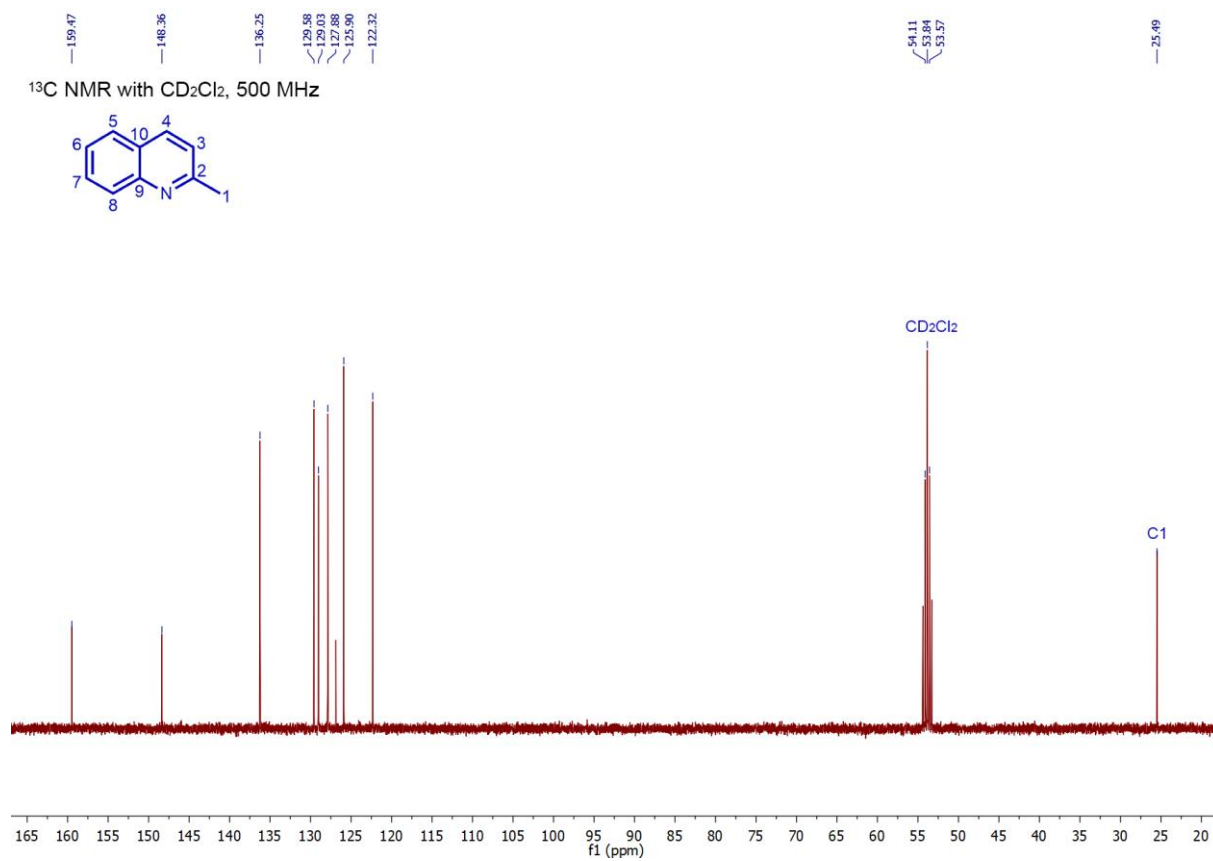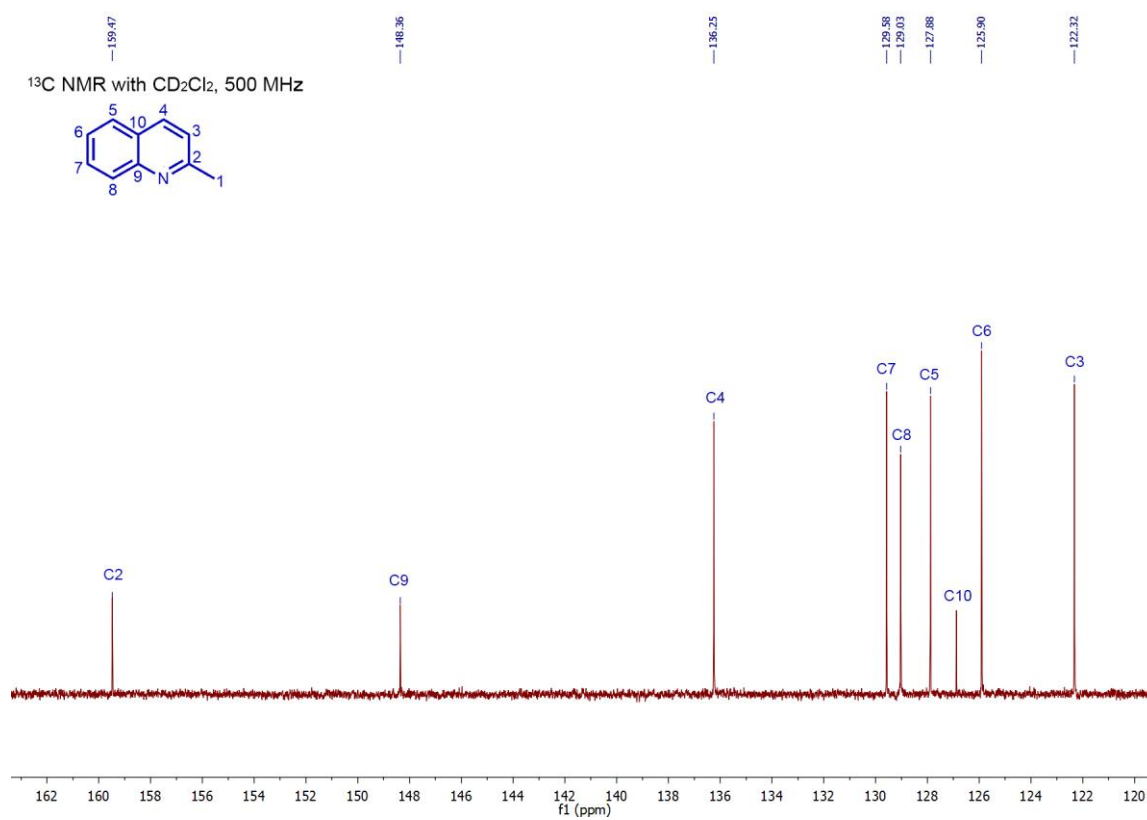

**Figure S18.** <sup>13</sup>C NMR spectrum of 2-methyl-quinoline (top) and amplified aromatic part of <sup>1</sup>H NMR spectra (bottom).

$^1\text{H}$ - $^{13}\text{C}$  HSQCED with  $\text{CD}_2\text{Cl}_2$ , 500 MHz

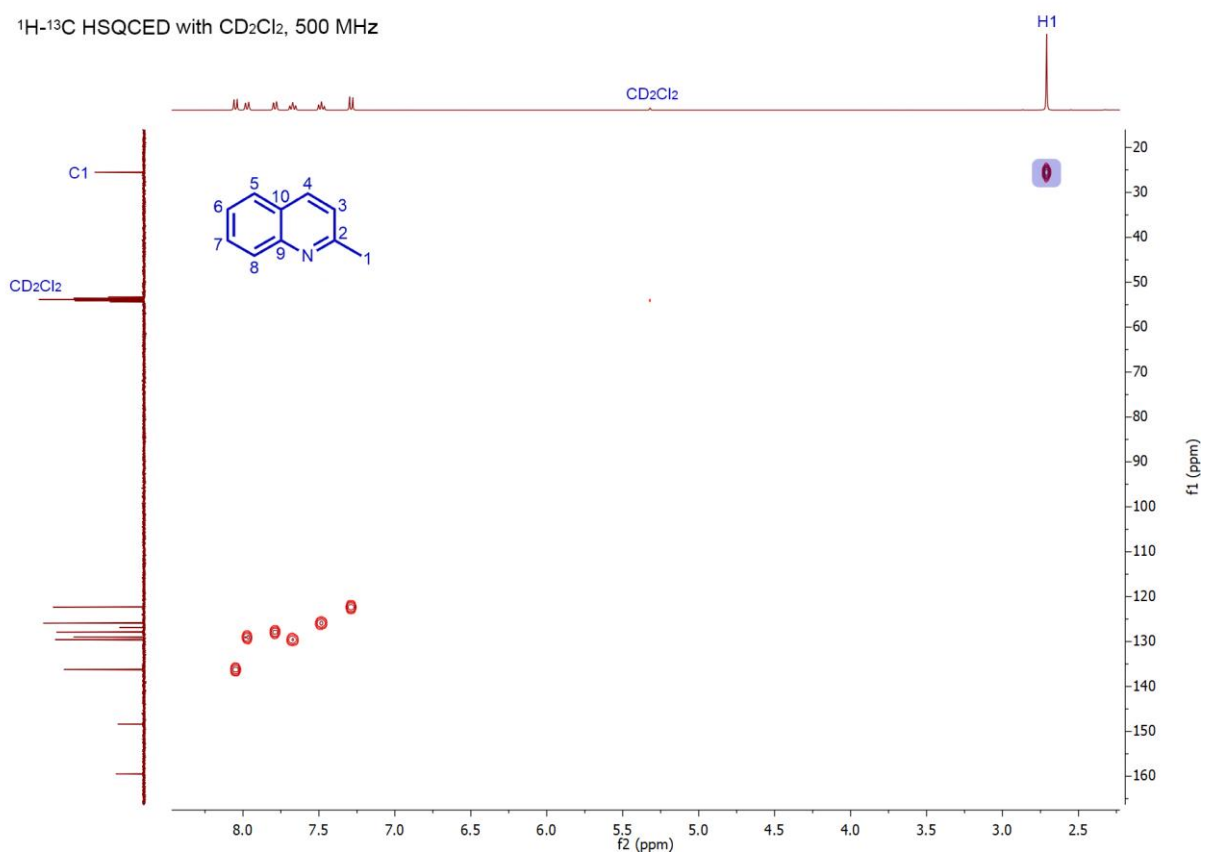

$^1\text{H}$ - $^{13}\text{C}$  HSQCED with  $\text{CD}_2\text{Cl}_2$ , 500 MHz

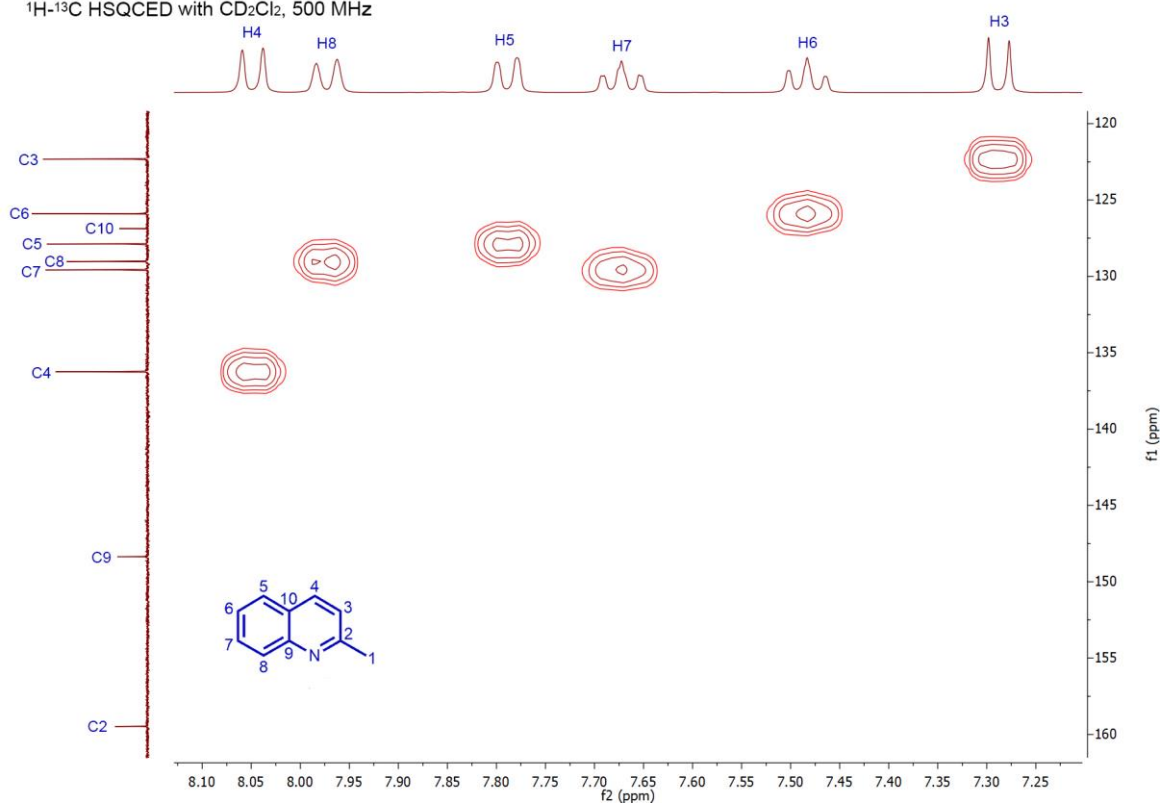

**Figure S19.**  $^1\text{H}$ - $^{13}\text{C}$  HSQCED spectrum of 2-methyl-quinoline (top) and amplified aromatic part of  $^1\text{H}$ - $^{13}\text{C}$  HSQCED spectra (bottom).

$^1\text{H}$ - $^{13}\text{C}$  HMBC with  $\text{CD}_2\text{Cl}_2$ , 500 MHz

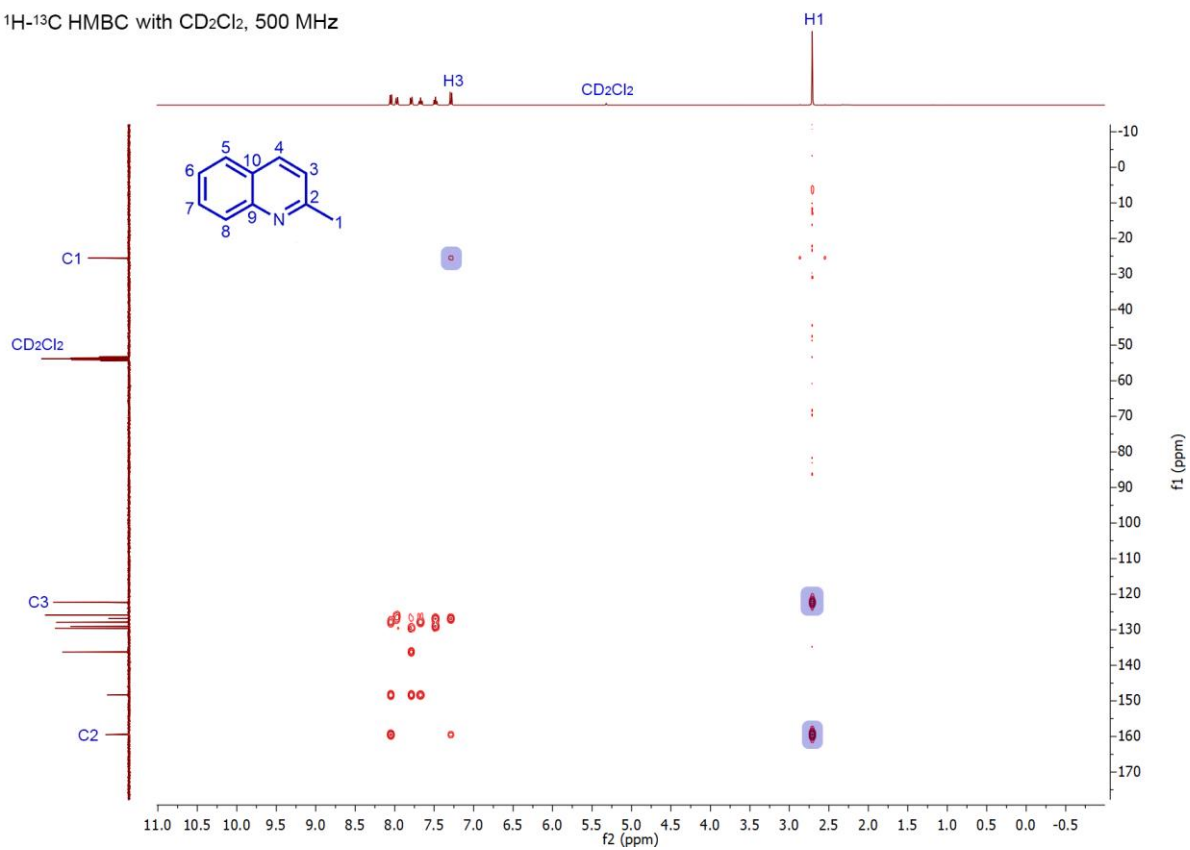

$^1\text{H}$ - $^{13}\text{C}$  HMBC with  
 $\text{CD}_2\text{Cl}_2$ , 500 MHz

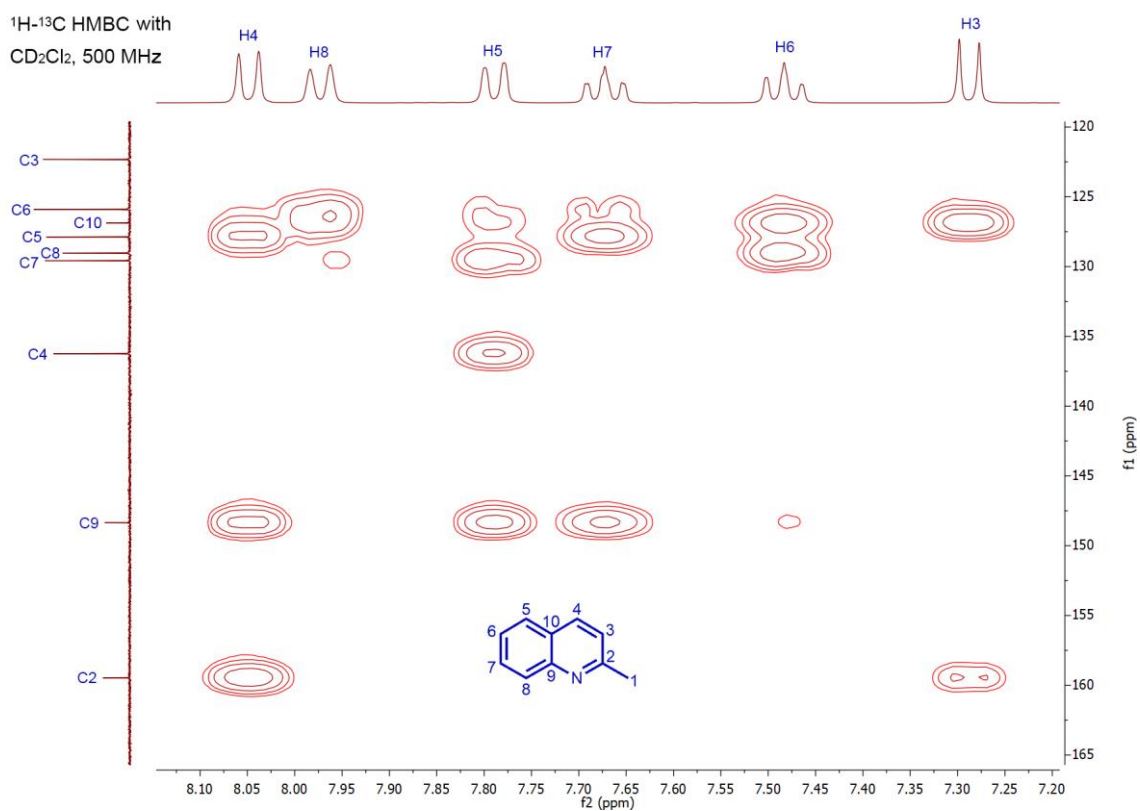

**Figure S20.**  $^1\text{H}$ - $^{13}\text{C}$  HMBC spectrum of 2-methyl-quinoline (top) and amplified aromatic part of  $^1\text{H}$ - $^{13}\text{C}$  HMBC spectra (bottom).

### **2-methyl-quinoline-BF<sub>3</sub> complex**

2 Equiv. of BF<sub>3</sub>·Et<sub>2</sub>O was added to a solution of 2-methyl-quinoline in CD<sub>2</sub>Cl<sub>2</sub> in a dry NMR tube at -50 °C under N<sub>2</sub> atmosphere, leading to instantaneous formation of a new species which was immediately measured by NMR spectroscopy at -50 °C. Full characterization was carried out by <sup>1</sup>H NMR (Figure S21), <sup>13</sup>C NMR (Figure S22), <sup>1</sup>H-<sup>13</sup>C-HSQCED (Figure S23) and <sup>1</sup>H-<sup>13</sup>C-HMBC (Figure S24). The peaks of 2-methyl-quinoline for both <sup>1</sup>H NMR and <sup>13</sup>C NMR have shifted after coordinating with BF<sub>3</sub>, indicating the formation of 2-methyl-quinoline-BF<sub>3</sub> complex.

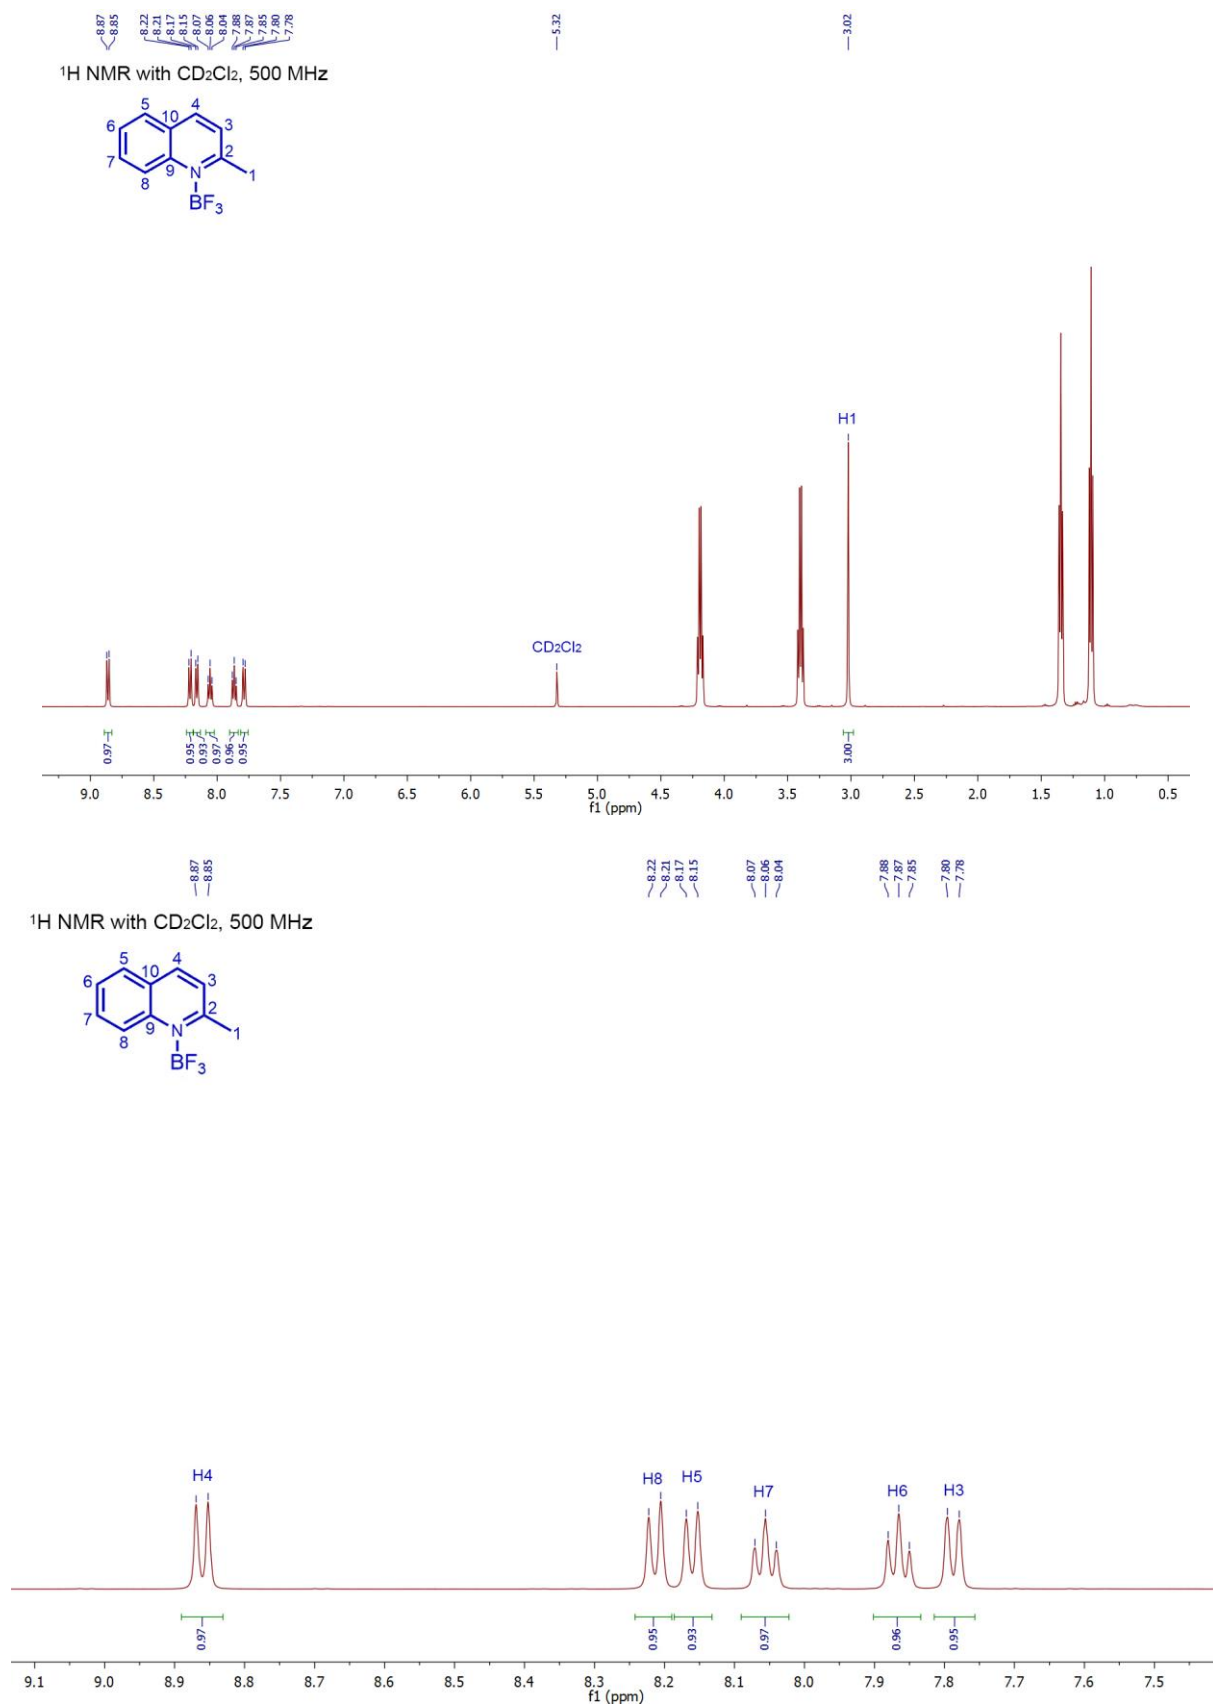

**Figure S21.** <sup>1</sup>H NMR spectrum of the mixture of 2-methyl-quinoline and BF<sub>3</sub>·Et<sub>2</sub>O (top) and amplified aromatic part of <sup>1</sup>H NMR spectra (bottom).

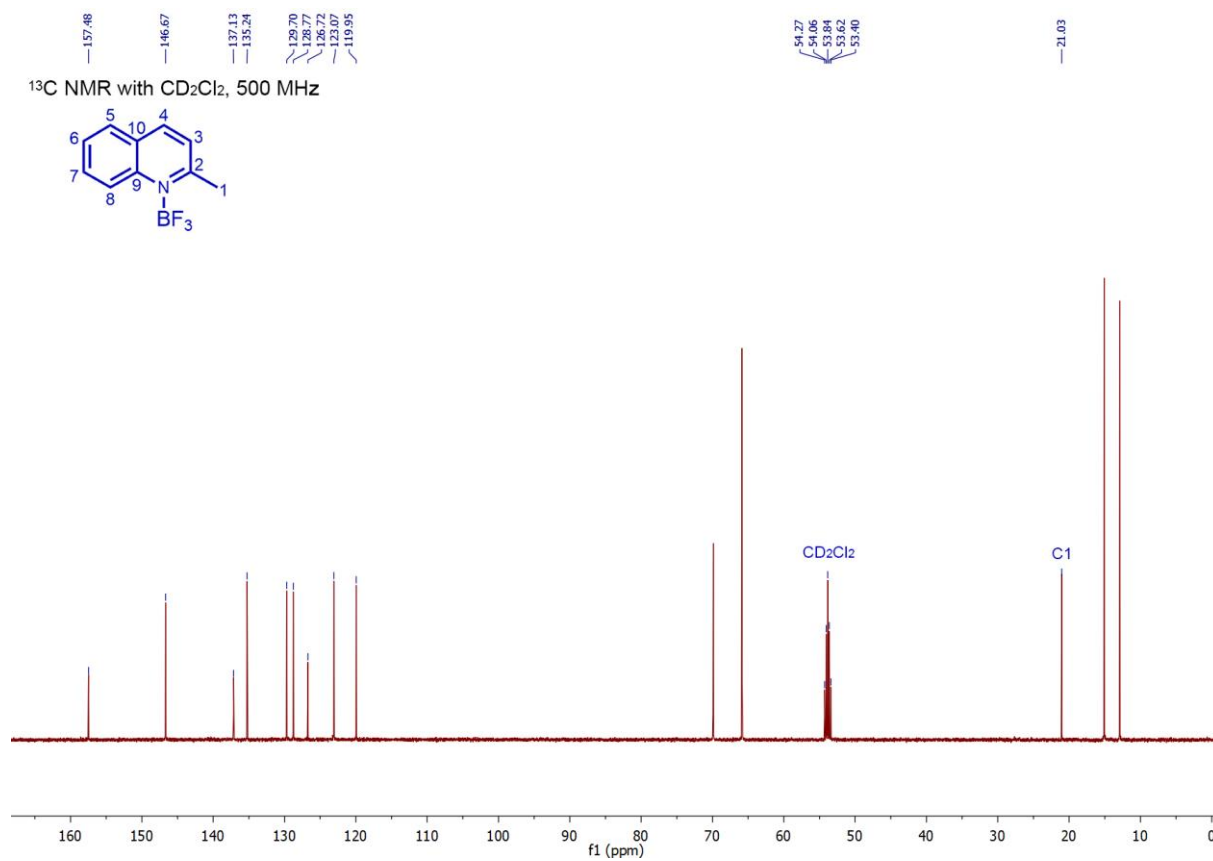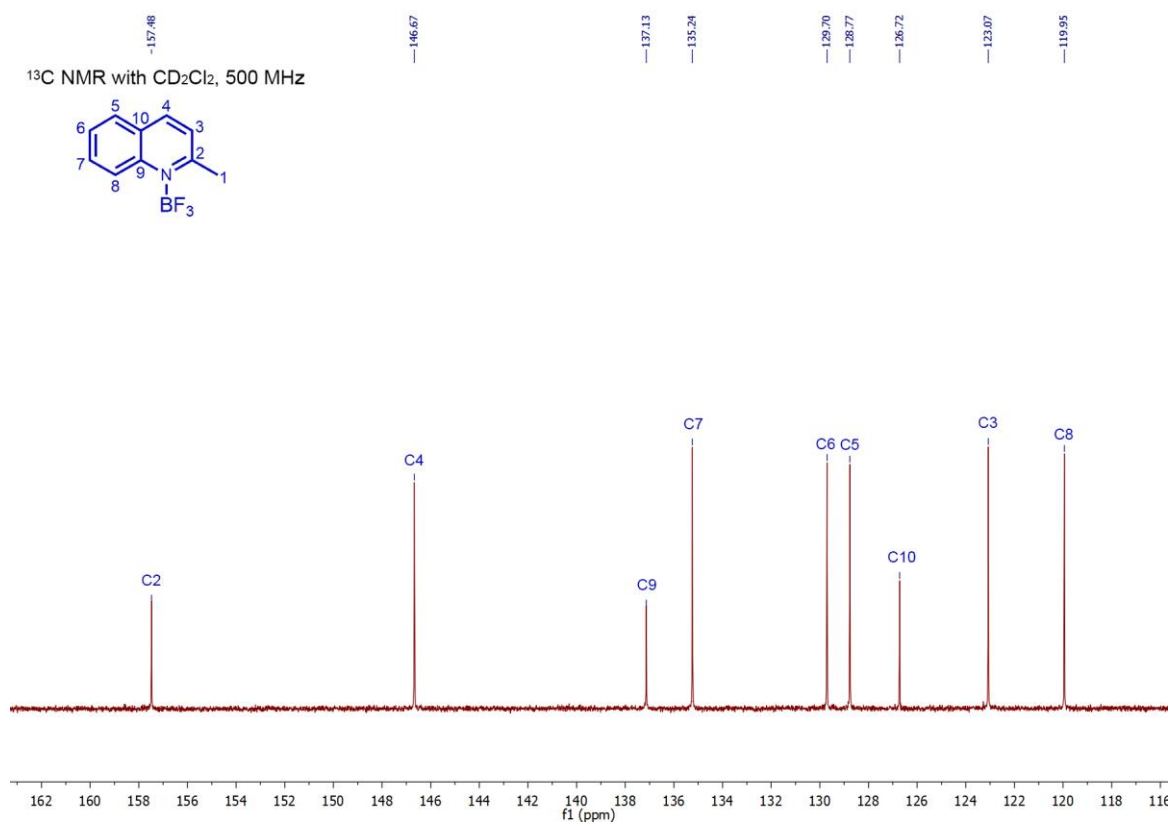

**Figure S22.** <sup>13</sup>C NMR spectrum of the mixture of 2-methylquinoline and BF<sub>3</sub>·Et<sub>2</sub>O (top) and amplified aromatic part of <sup>13</sup>C NMR spectra (bottom).

$^1\text{H}$ - $^{13}\text{C}$  HSQCED with  $\text{CD}_2\text{Cl}_2$ , 500 MHz

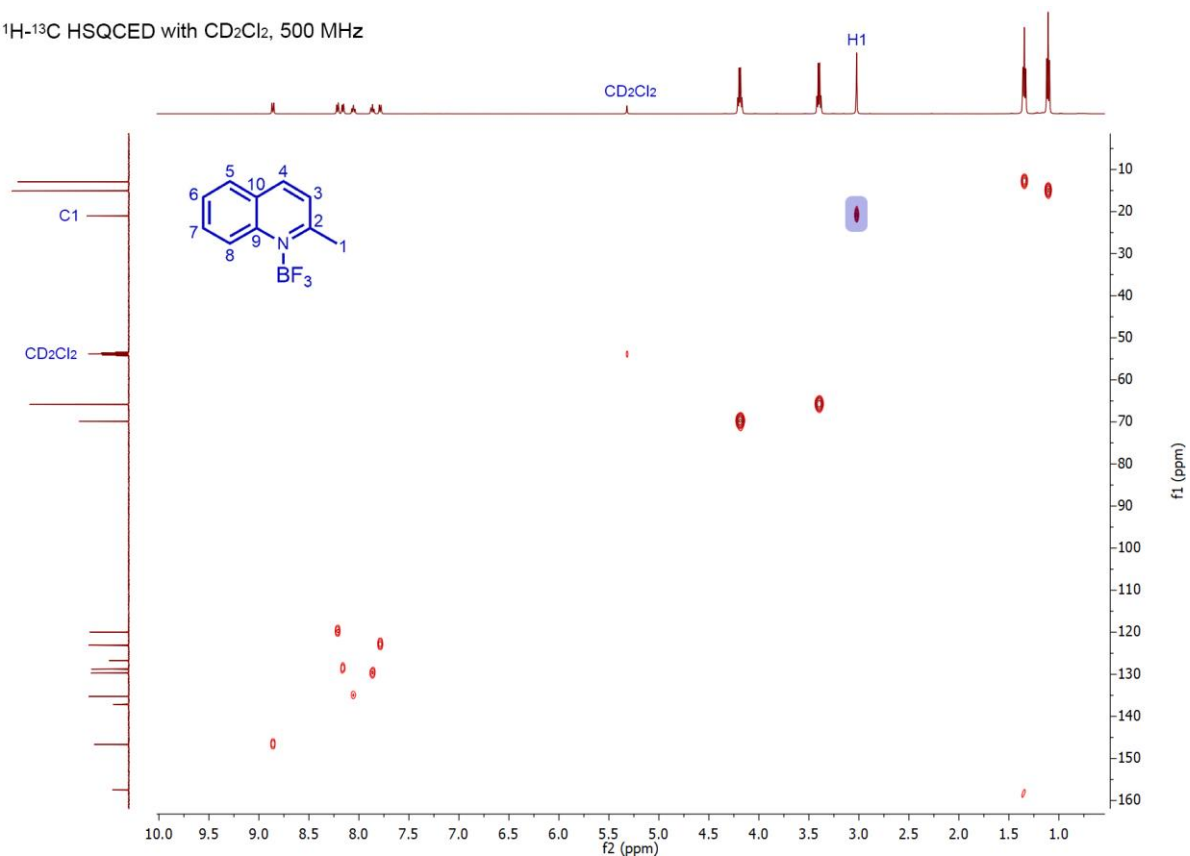

$^1\text{H}$ - $^{13}\text{C}$  HSQCED with  
 $\text{CD}_2\text{Cl}_2$ , 500 MHz

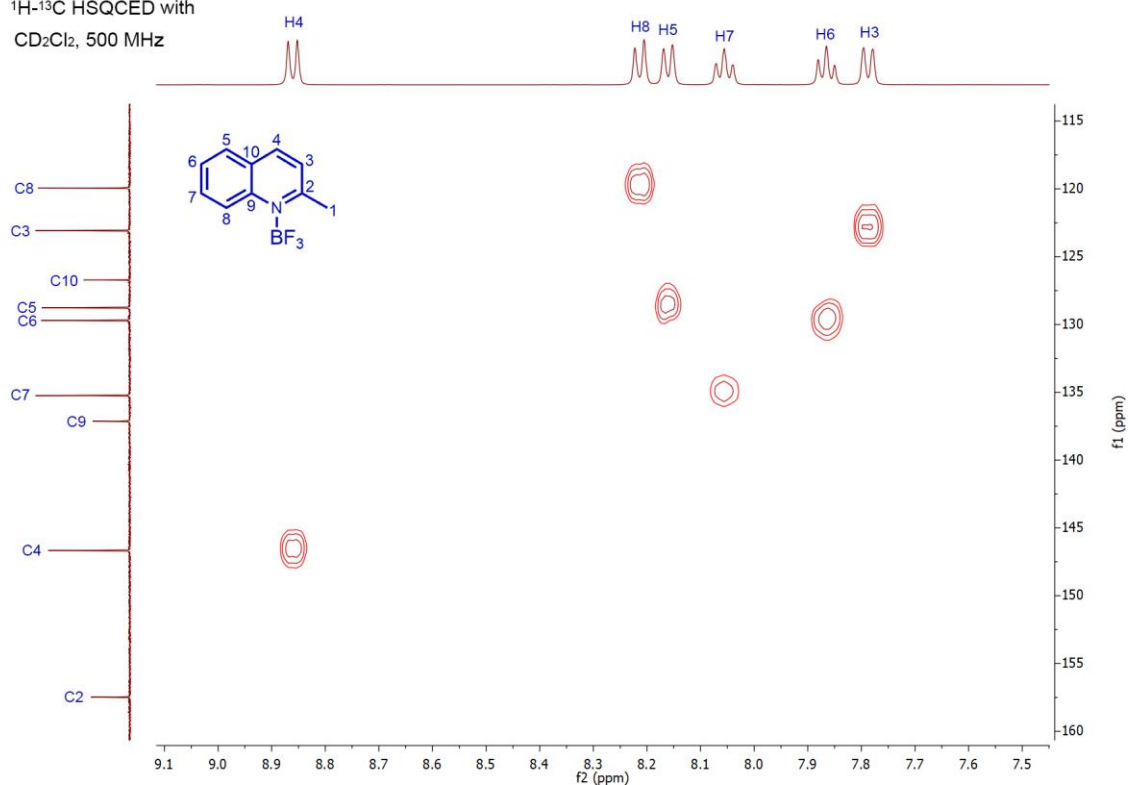

**Figure S23.**  $^1\text{H}$ - $^{13}\text{C}$  HSQCED spectrum of the mixture of 2-methylquinoline and  $\text{BF}_3\cdot\text{Et}_2\text{O}$  (top) and amplified aromatic part of  $^1\text{H}$ - $^{13}\text{C}$  HSQCED spectra (bottom).

$^1\text{H}$ - $^{13}\text{C}$  HMBC with  $\text{CD}_2\text{Cl}_2$ , 500 MHz

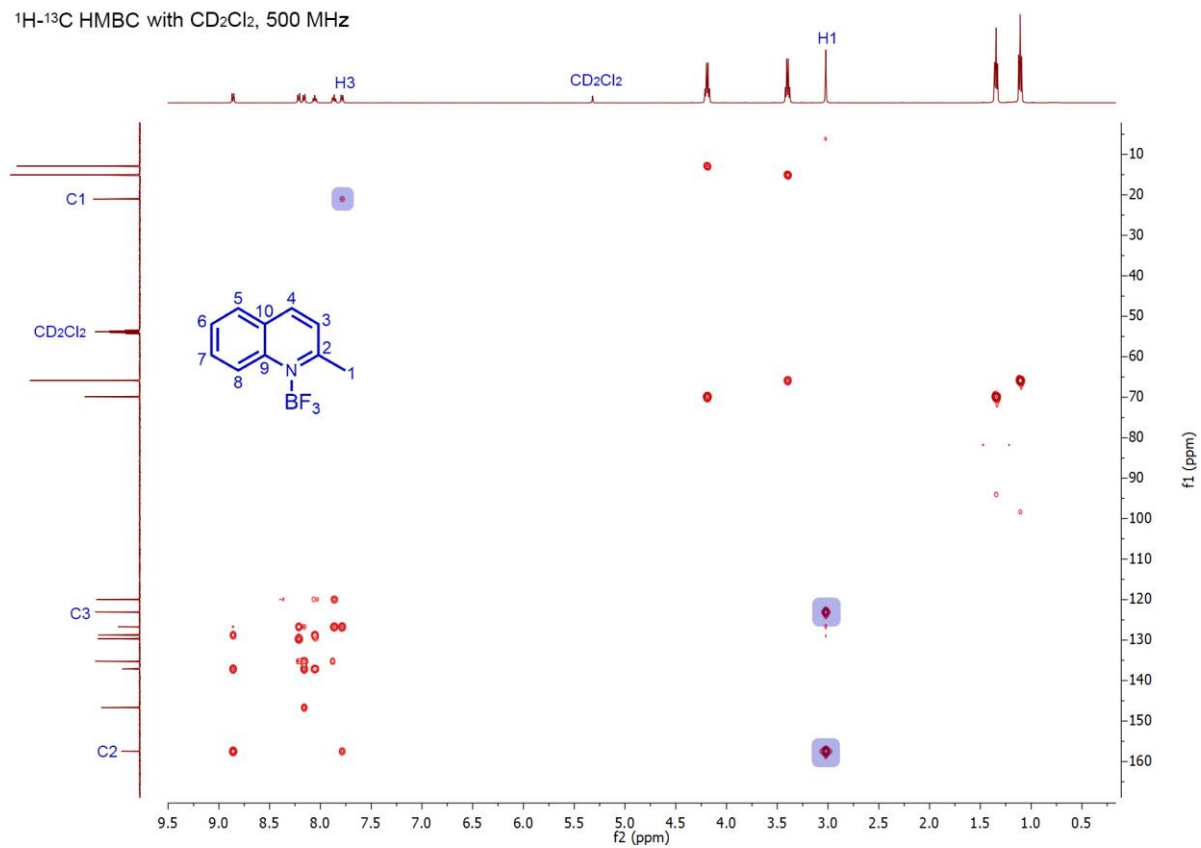

$^1\text{H}$ - $^{13}\text{C}$  HMBC with  $\text{CD}_2\text{Cl}_2$ , 500 MHz

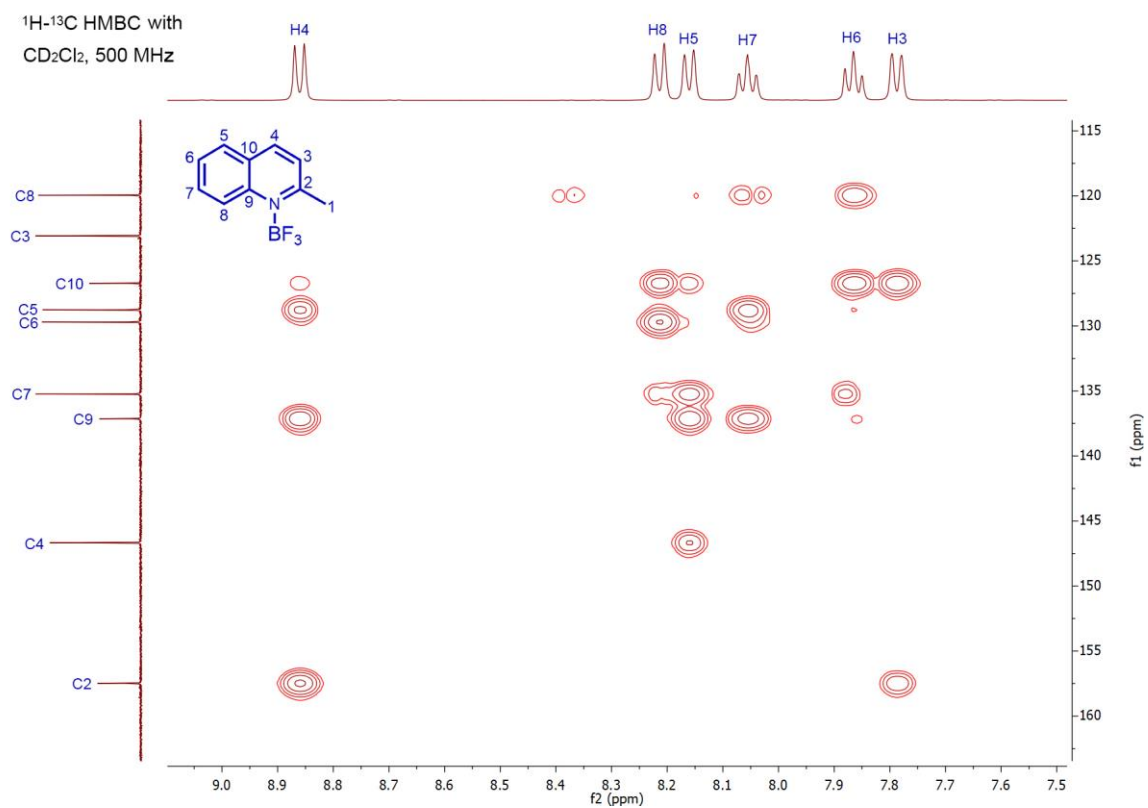

**Figure S24.**  $^1\text{H}$ - $^{13}\text{C}$  HMBC spectrum of the mixture of 2-methyl-quinoline and  $\text{BF}_3\cdot\text{Et}_2\text{O}$  (top) and amplified aromatic part of  $^1\text{H}$ - $^{13}\text{C}$  HMBC spectra (bottom).



### **2-methyl-quinoline-L4-CuBr complex**

1 Equiv. of **L4**-CuBr catalyst was added to a solution of 2-methyl-quinoline in CD<sub>2</sub>Cl<sub>2</sub> in a dry NMR tube at -50 °C under N<sub>2</sub> atmosphere, leading to instantaneous formation of a new species which was immediately measured by NMR spectroscopy at -50 °C. Full characterization was carried out by <sup>1</sup>H NMR (Figure S25), <sup>13</sup>C NMR (Figure S26), <sup>1</sup>H-<sup>13</sup>C-HSQCED (Figure S27) and <sup>1</sup>H-<sup>13</sup>C-HMBC (Figure S28). The peaks of 2-methyl-quinoline for both <sup>1</sup>H NMR and <sup>13</sup>C NMR have shifted after coordinating with CuBr, indicating the formation of 2-methyl-quinoline- **L4**-CuBr complex.

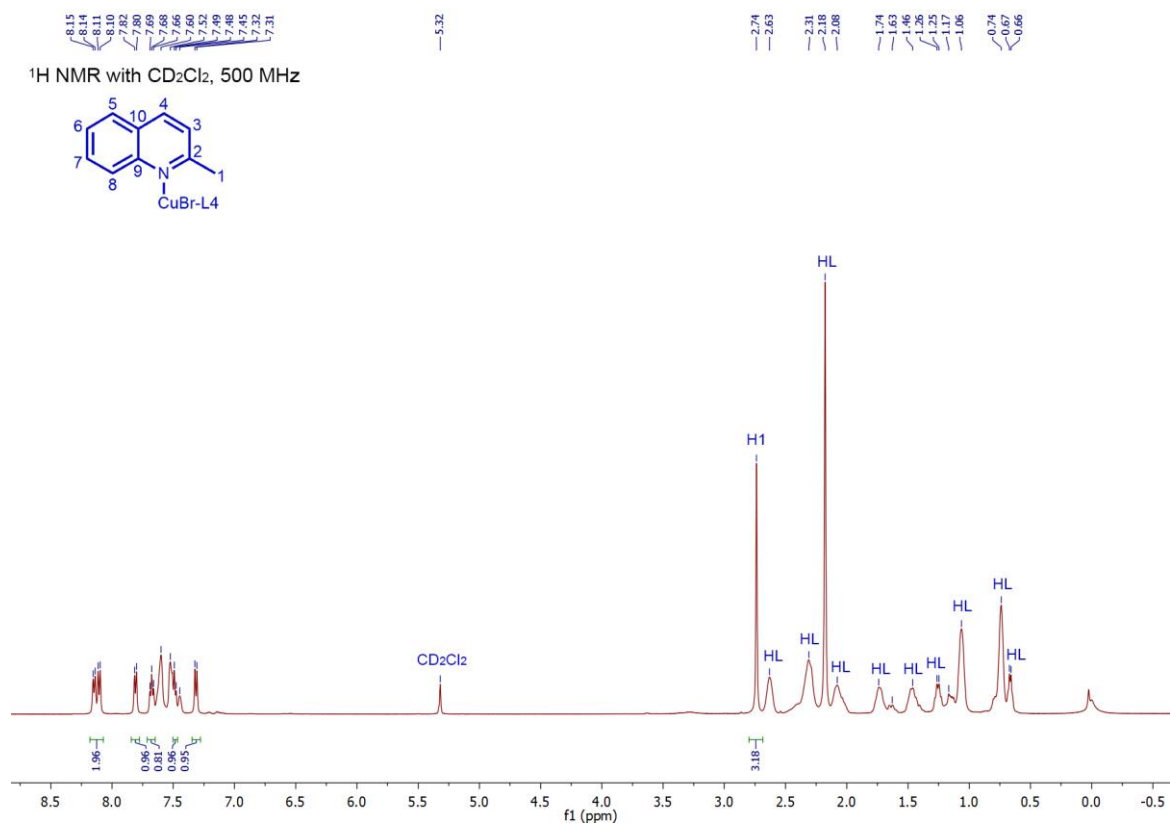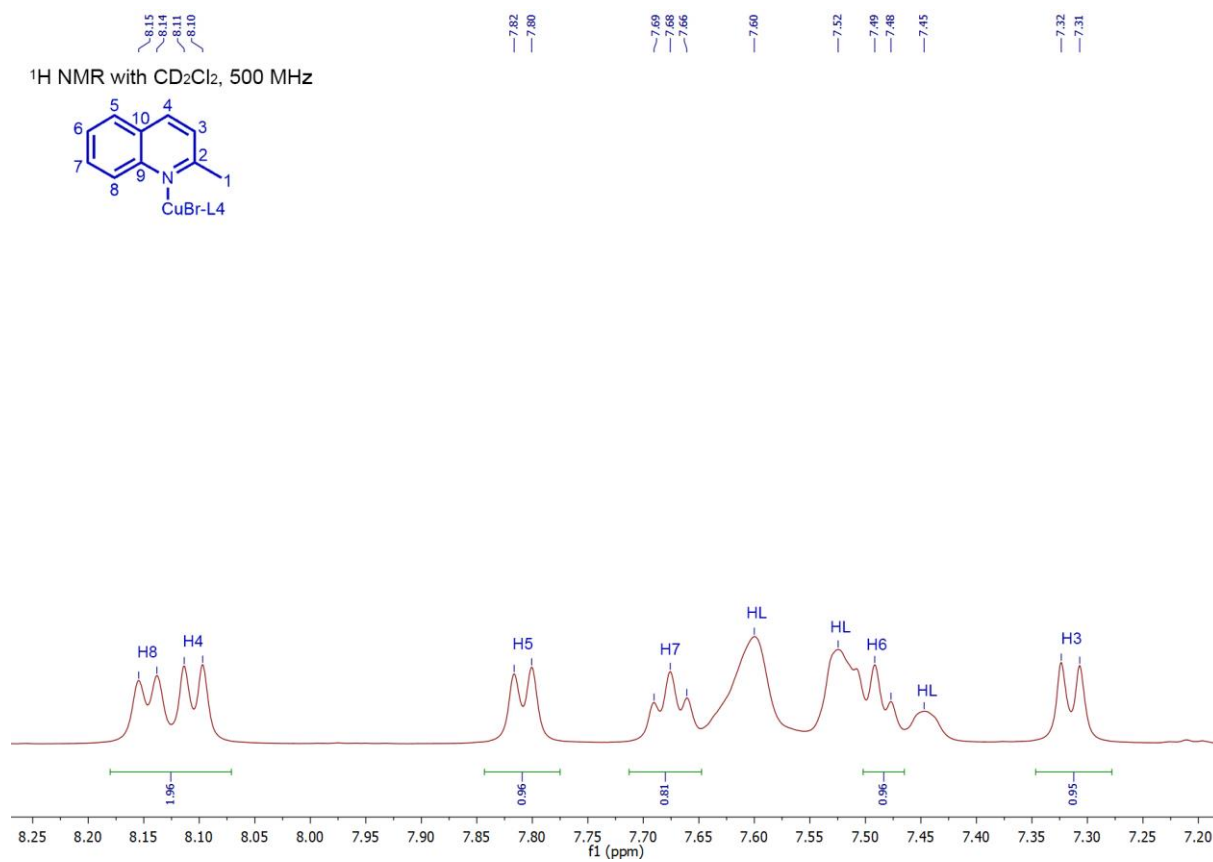

**Figure S25.** <sup>1</sup>H NMR spectrum of the mixture of 2-methyl-quinoline and **L4**-CuBr catalyst (top) and amplified aromatic part of <sup>1</sup>H NMR spectra (bottom).

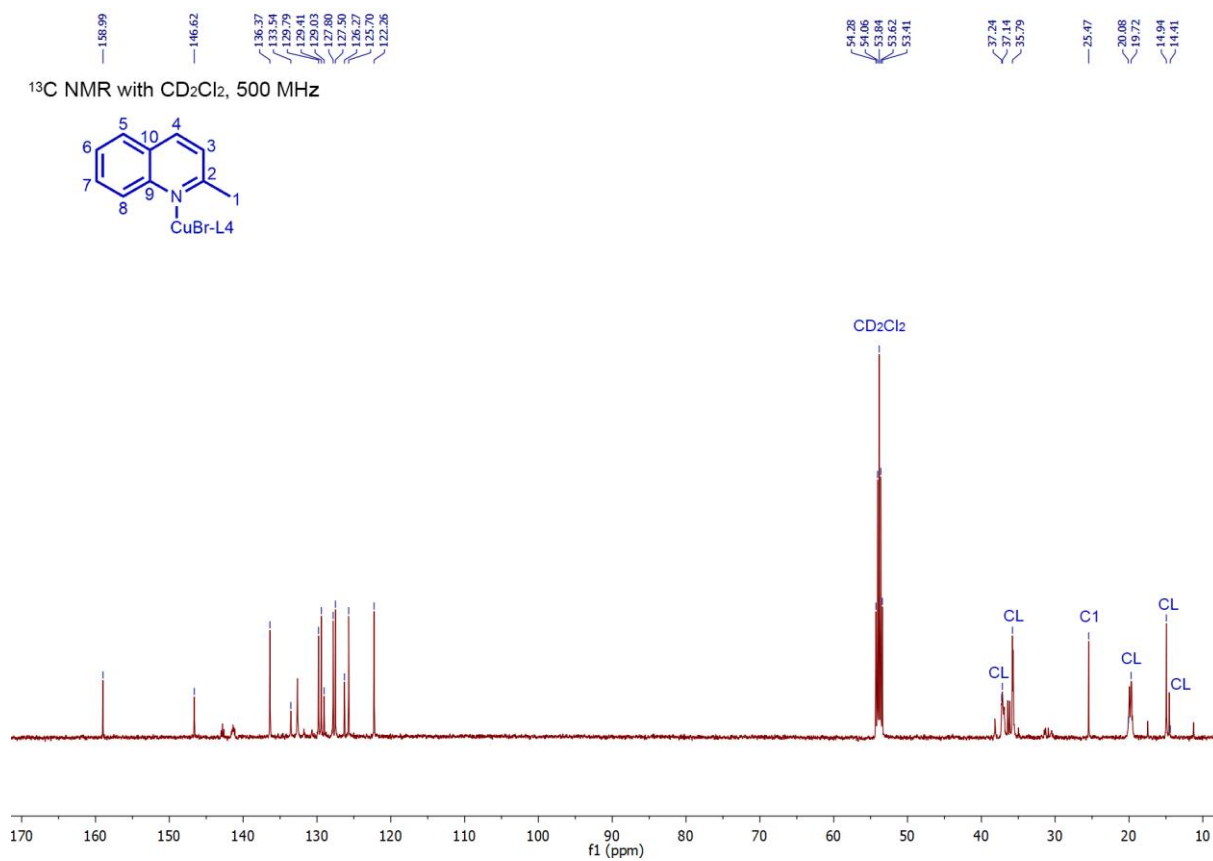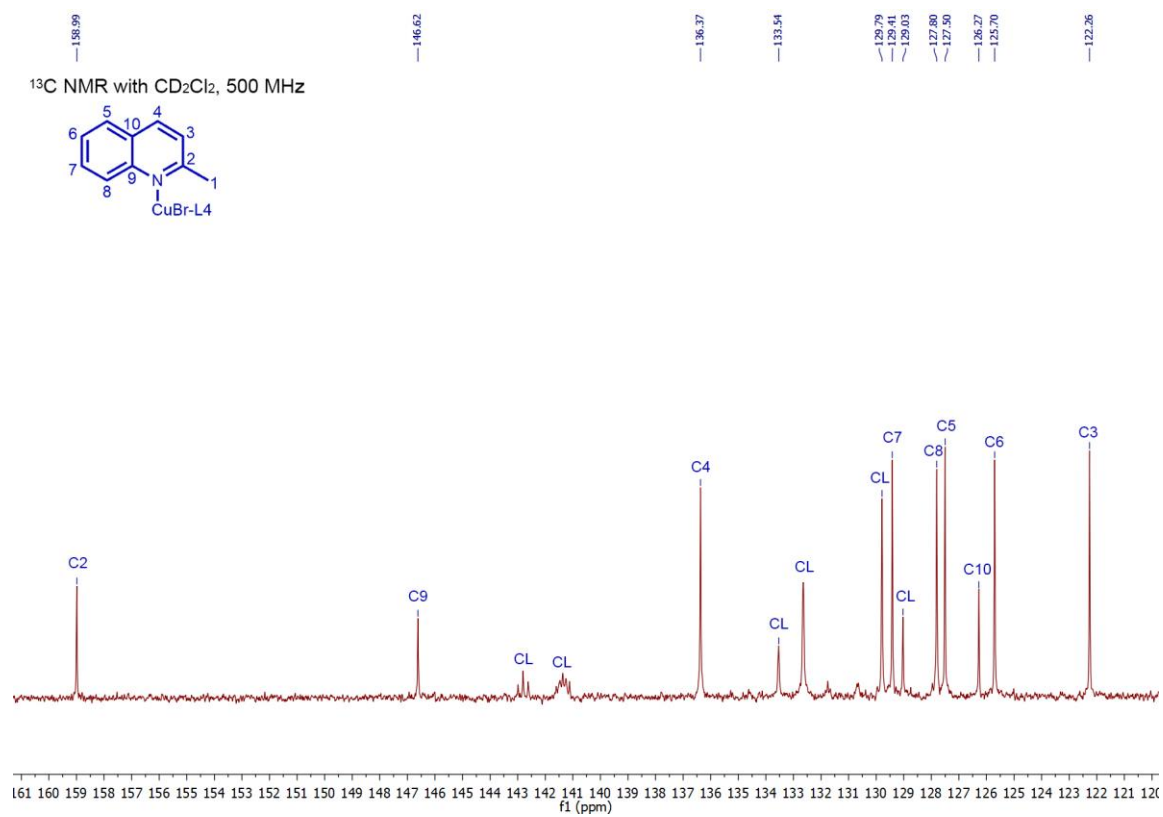

**Figure S26.** <sup>13</sup>C NMR spectrum of the mixture of 2-methyl-quinoline and L4-CuBr catalyst (top) and amplified aromatic part of <sup>13</sup>C NMR spectra (bottom).

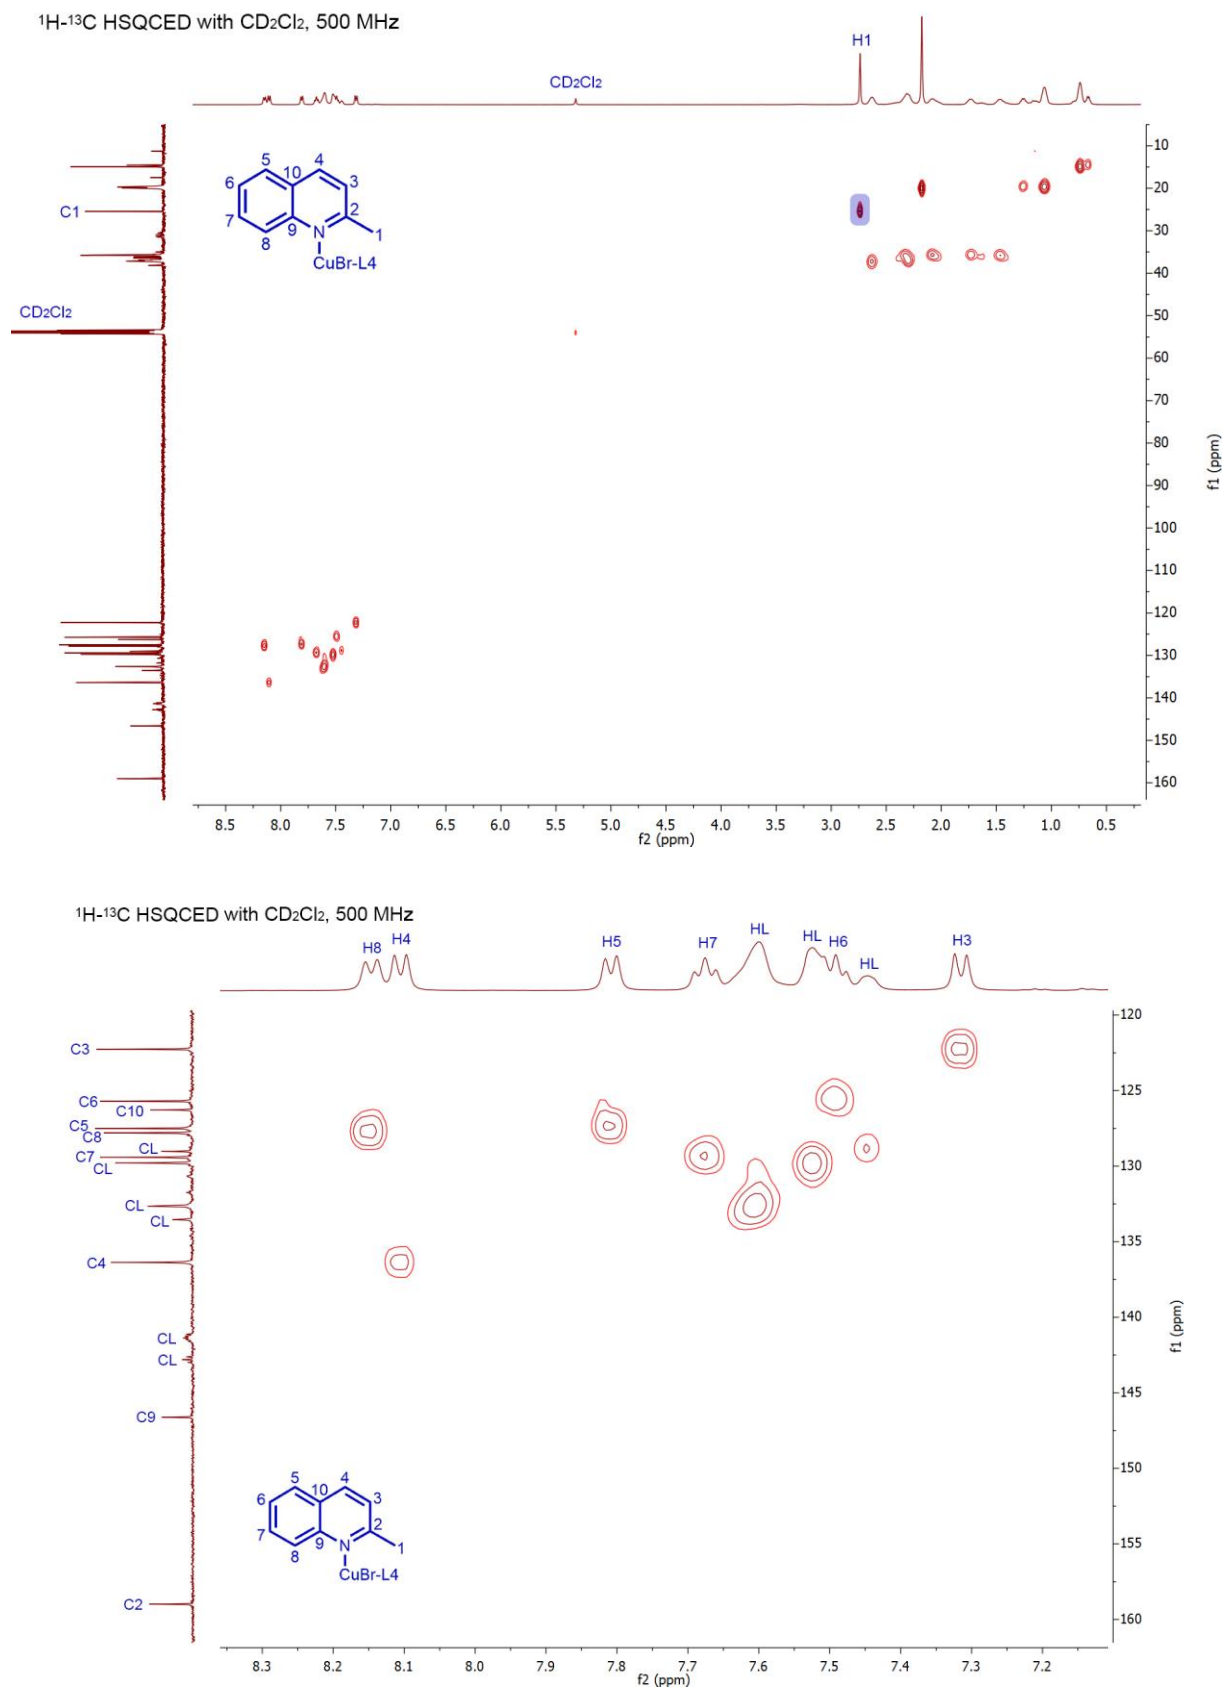

**Figure S27.**  $^1\text{H}$ - $^{13}\text{C}$  HSQCED spectrum of the mixture of 2-methyl-quinoline and **L4**-CuBr catalyst (top) and amplified aromatic part of  $^1\text{H}$ - $^{13}\text{C}$  HSQCED spectra (bottom).

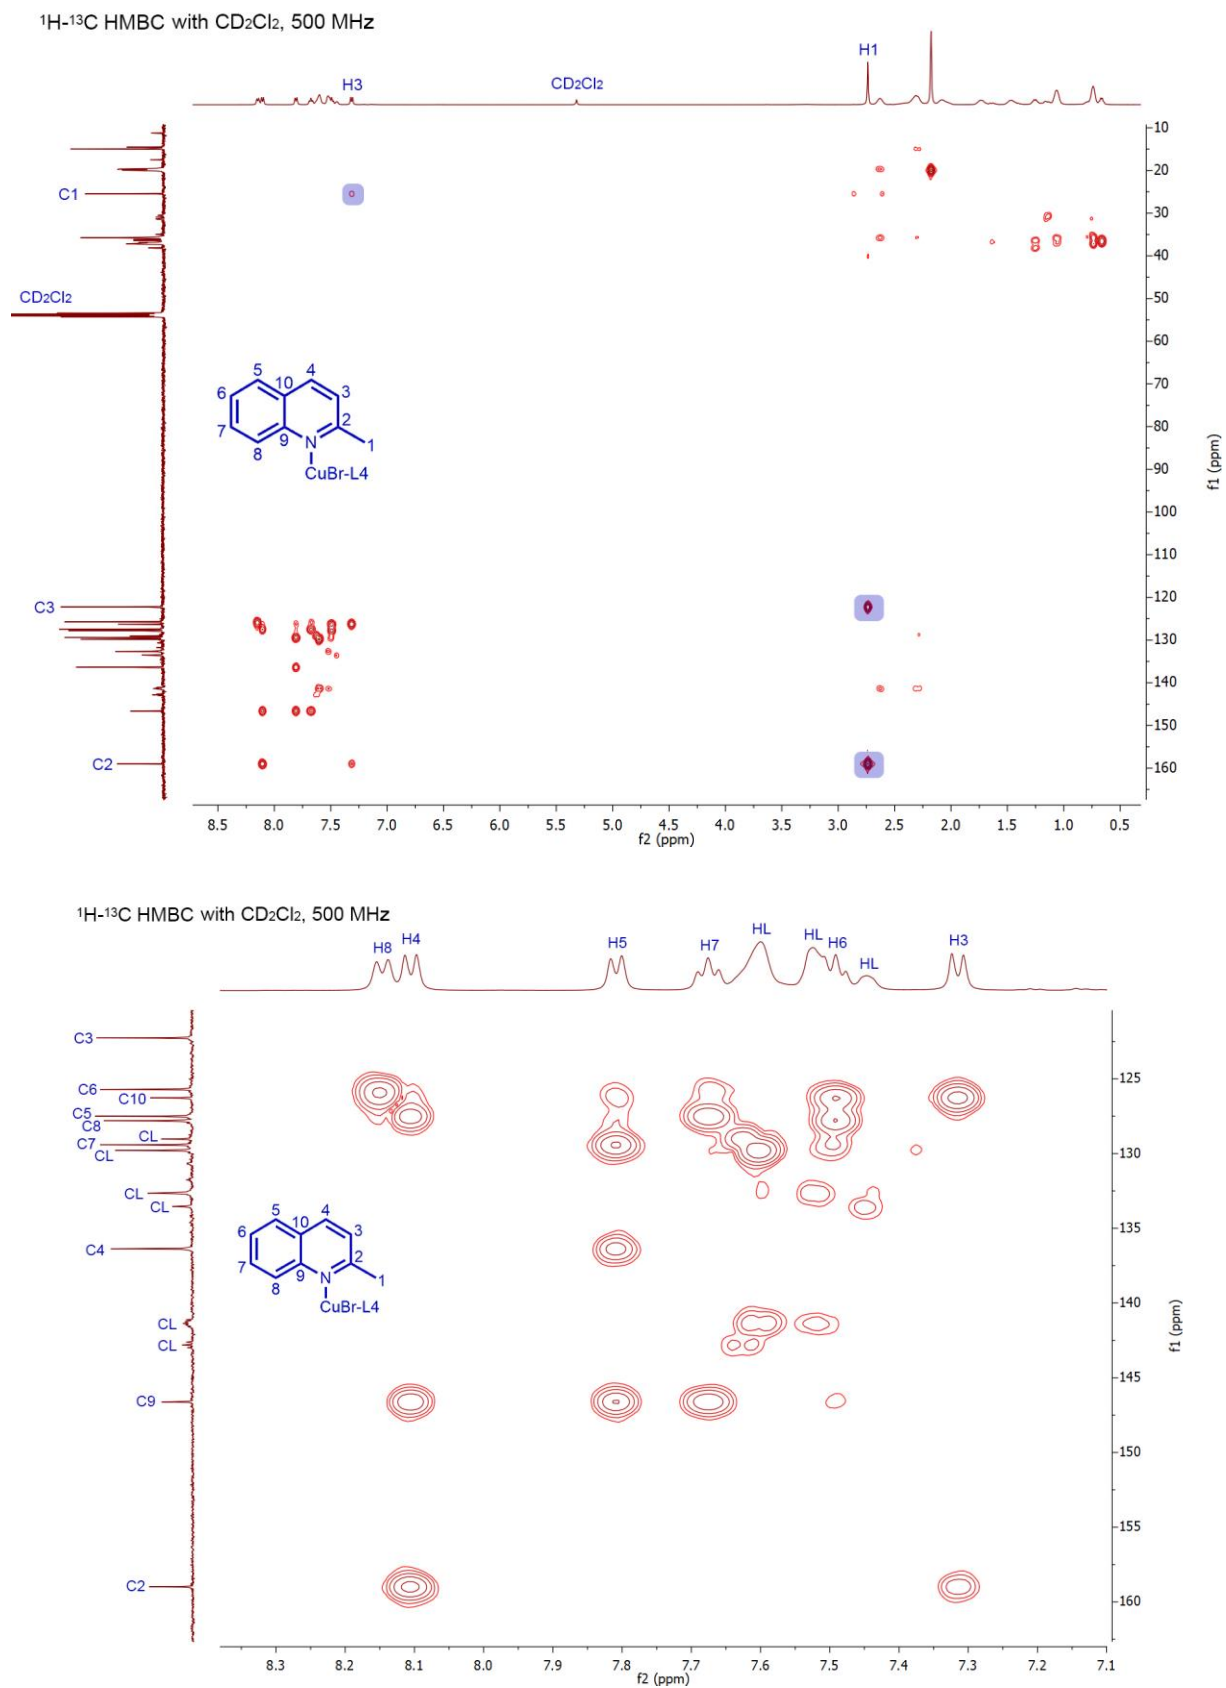

**Figure S28.**  $^1\text{H}$ - $^{13}\text{C}$  HMBC spectrum of the mixture of 2-methyl-quinoline and **L4**-CuBr catalyst (top) and amplified aromatic part of  $^1\text{H}$ - $^{13}\text{C}$  HMBC spectra (bottom).

### Formation of 2-methyl-quinoline/BF<sub>3</sub>/L4-CuBr complex

1 Equiv. of **L4**-CuBr catalyst and 2 equiv. of BF<sub>3</sub>·Et<sub>2</sub>O was added to a solution of 2-methyl-quinoline in CD<sub>2</sub>Cl<sub>2</sub> in a dry NMR tube at -50 °C under N<sub>2</sub> atmosphere, leading to instantaneous formation of a new species which was immediately measured by NMR spectroscopy at -50 °C. Full characterization was carried out by <sup>1</sup>H NMR (Figure S29), <sup>13</sup>C NMR (Figure S30), <sup>1</sup>H-<sup>13</sup>C-HSQCED (Figure S31) and <sup>1</sup>H-<sup>13</sup>C-HMBC (Figure S32). The peaks of 2-methyl-quinoline for both <sup>1</sup>H NMR and <sup>13</sup>C NMR have shifted after adding BF<sub>3</sub>·Et<sub>2</sub>O and **L4**-CuBr, and the spectra are different from 2-methyl-quinoline-BF<sub>3</sub> complex and 2-methyl-quinoline- **L4**-CuBr complex.

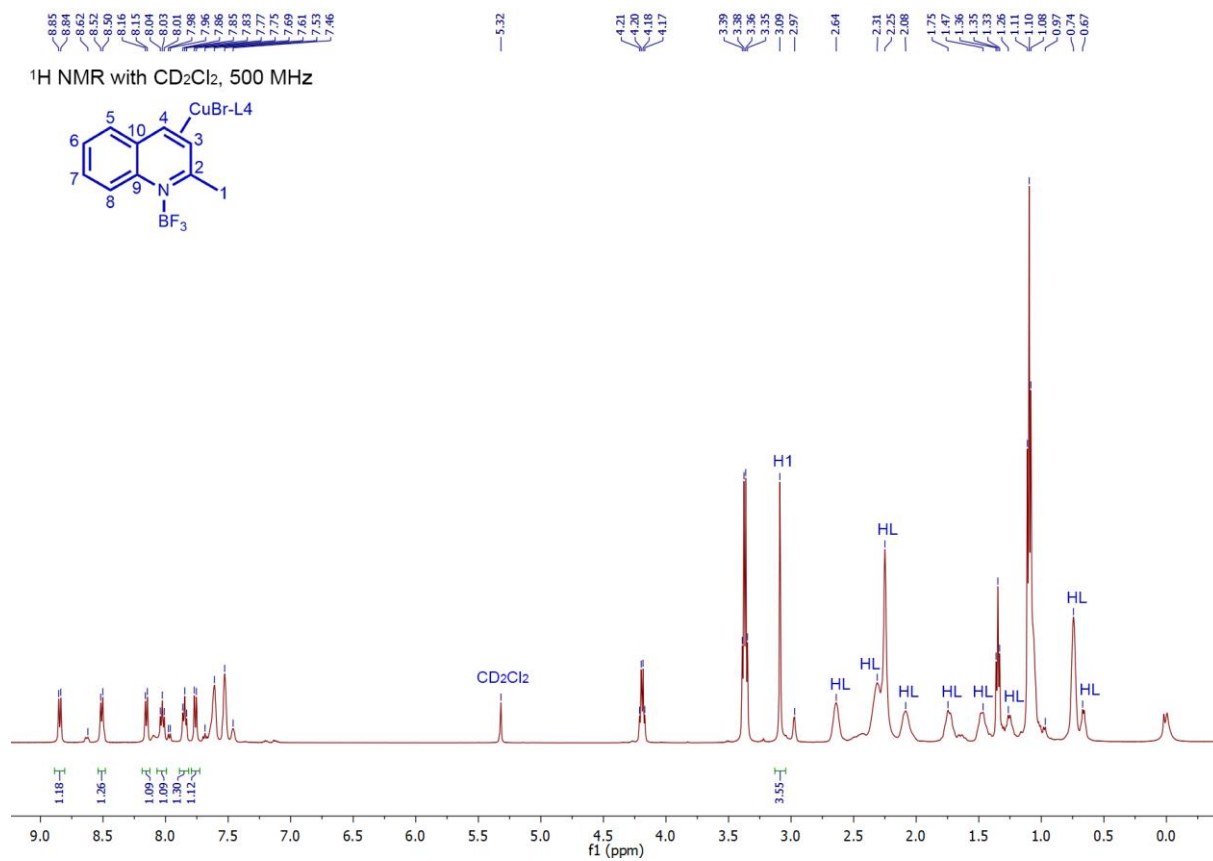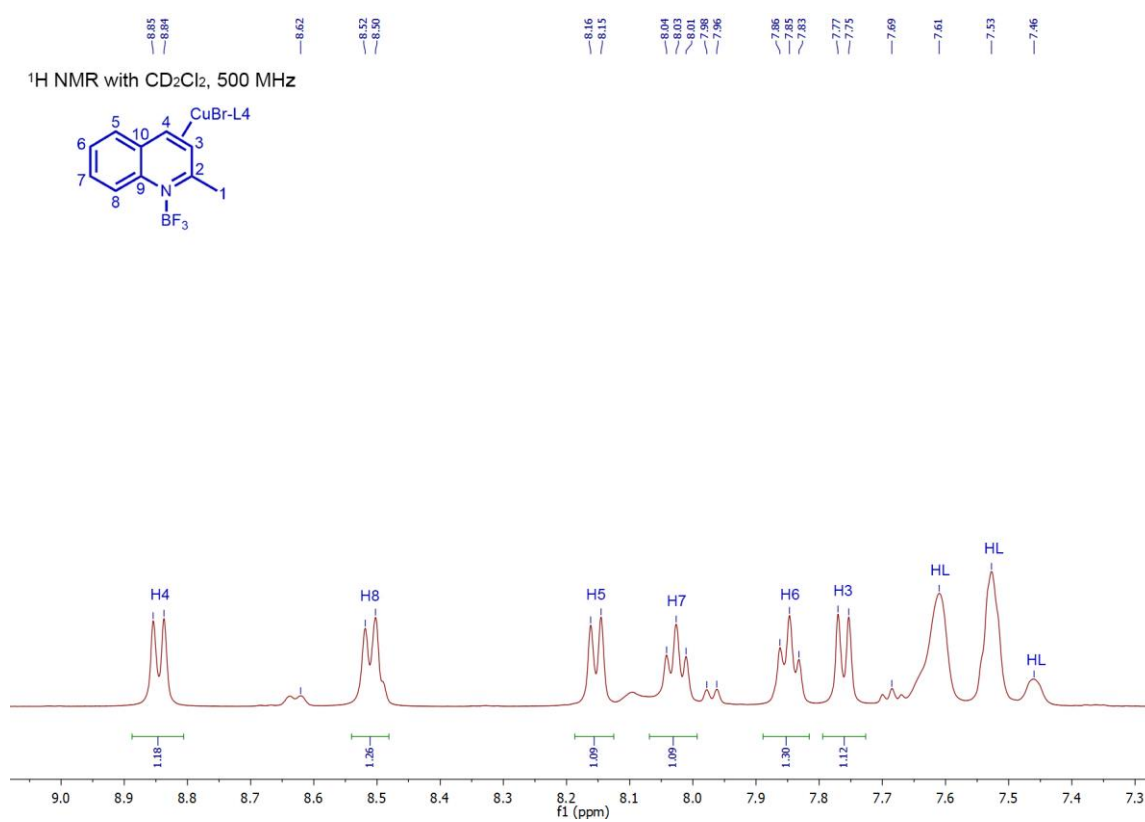

**Figure S29.** <sup>1</sup>H NMR spectrum of the mixture of 2-methyl-quinoline, BF<sub>3</sub>·Et<sub>2</sub>O and L4-CuBr catalyst (top) and amplified aromatic part of <sup>1</sup>H NMR spectra (bottom).

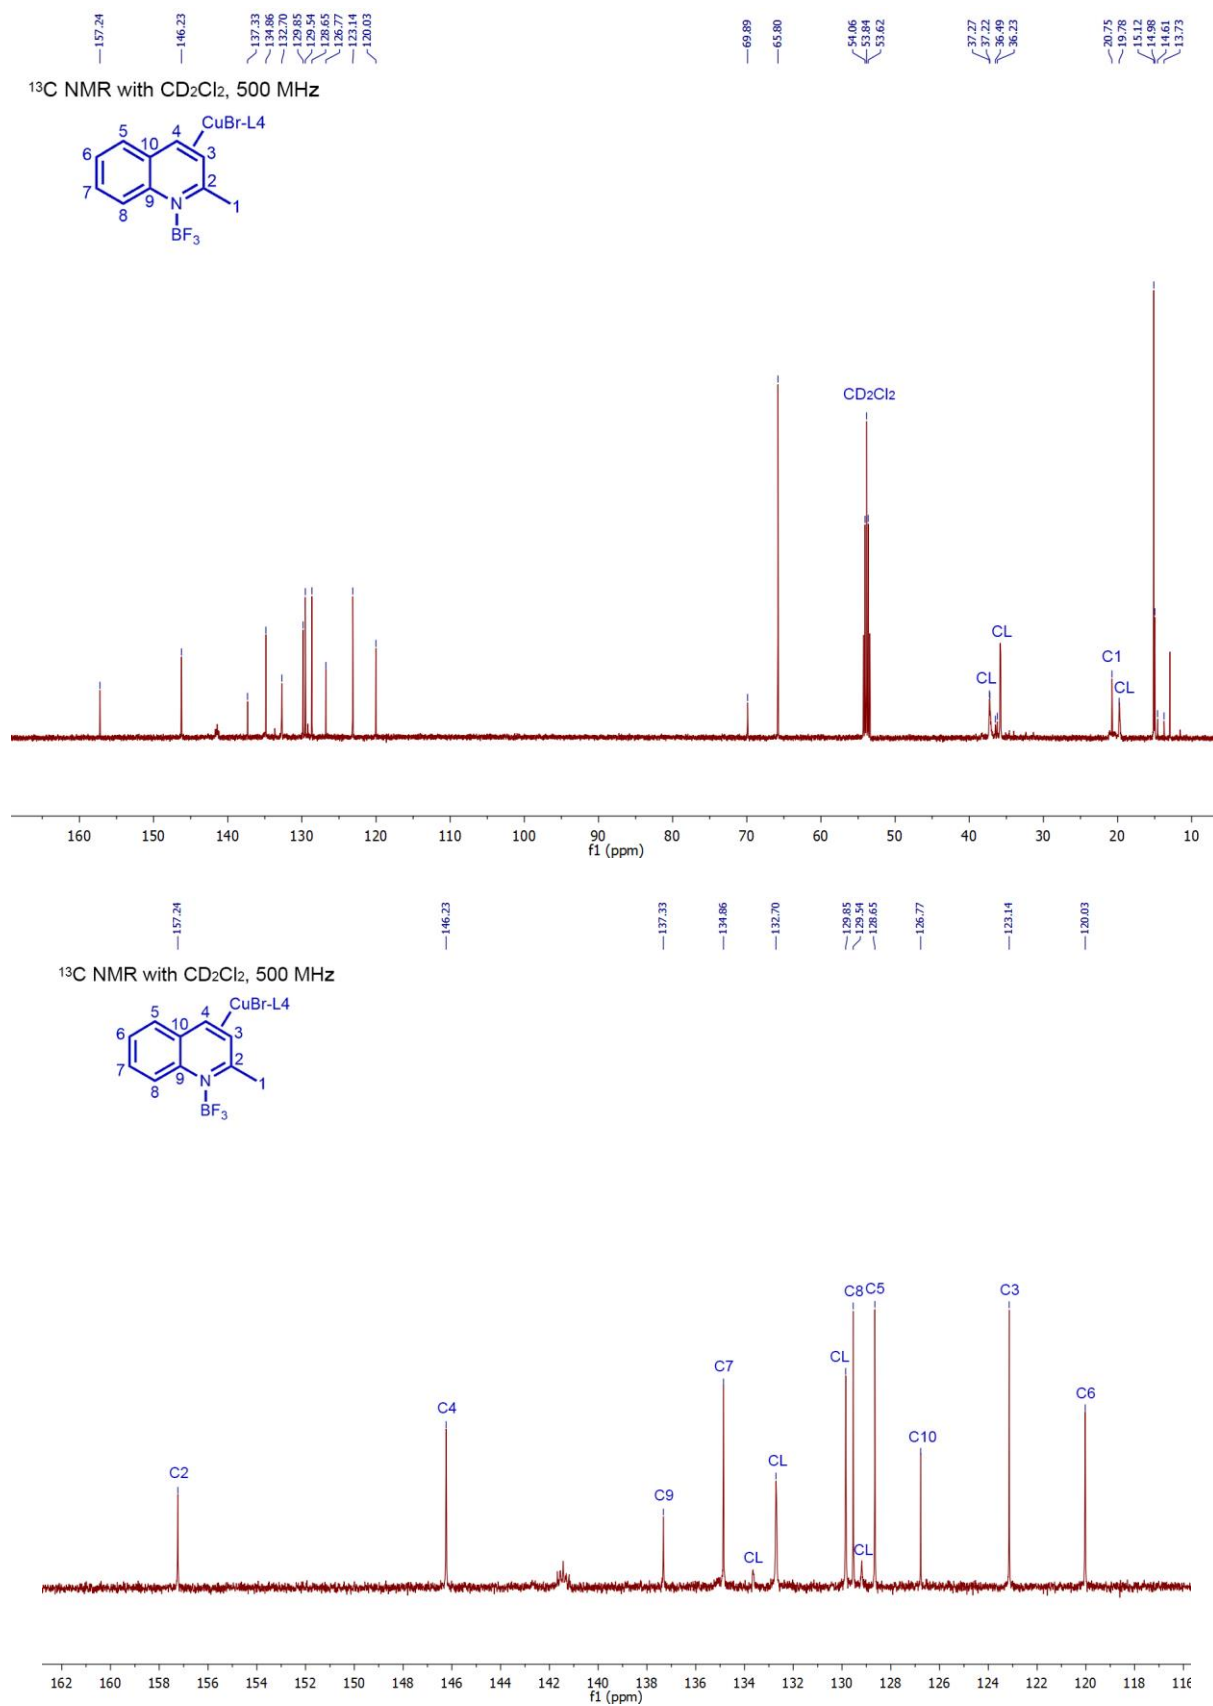

**Figure S30.** <sup>13</sup>C NMR spectrum of the mixture of 2-methylquinoline, BF<sub>3</sub>·Et<sub>2</sub>O and L4-CuBr catalyst (top) and amplified aromatic part of <sup>13</sup>C NMR spectra (bottom).



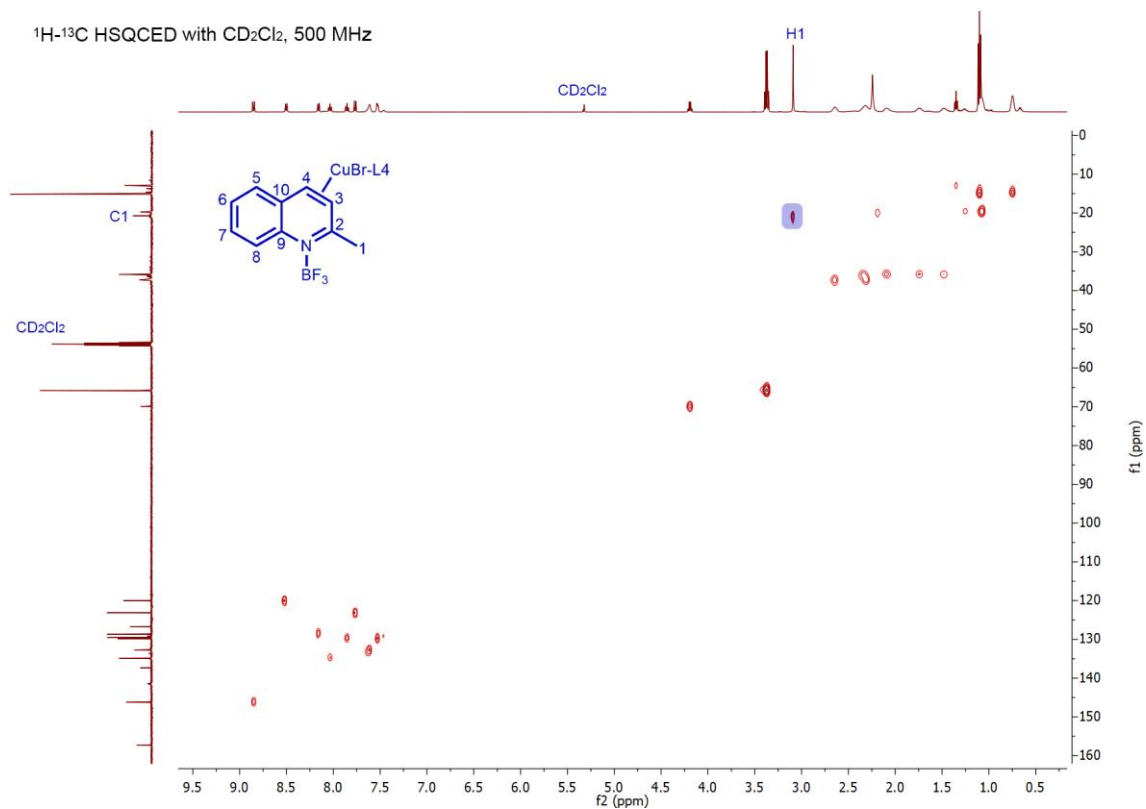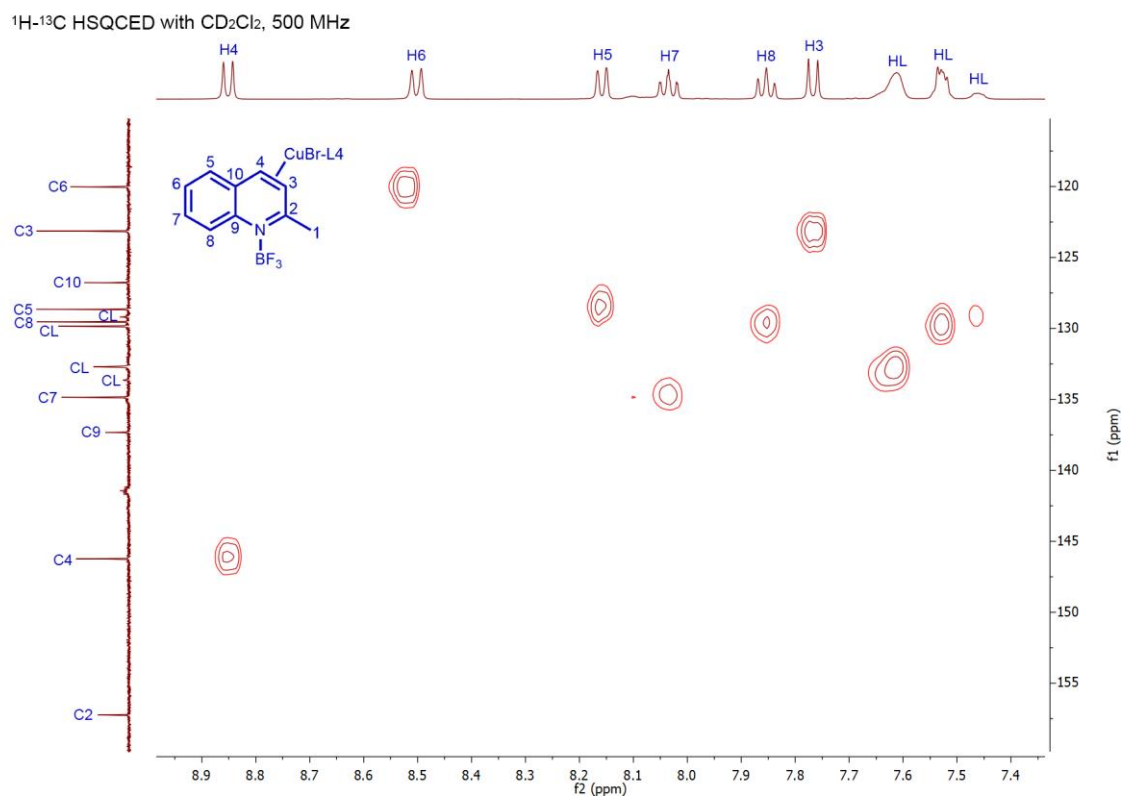

**Figure S31.**  $^1\text{H}$ - $^{13}\text{C}$  HSQCED spectrum of the mixture of 2-methyl-quinoline,  $\text{BF}_3 \cdot \text{Et}_2\text{O}$  and  $\text{L4-CuBr}$  catalyst (top) and amplified aromatic part of  $^1\text{H}$ - $^{13}\text{C}$  HSQCED spectra (bottom).

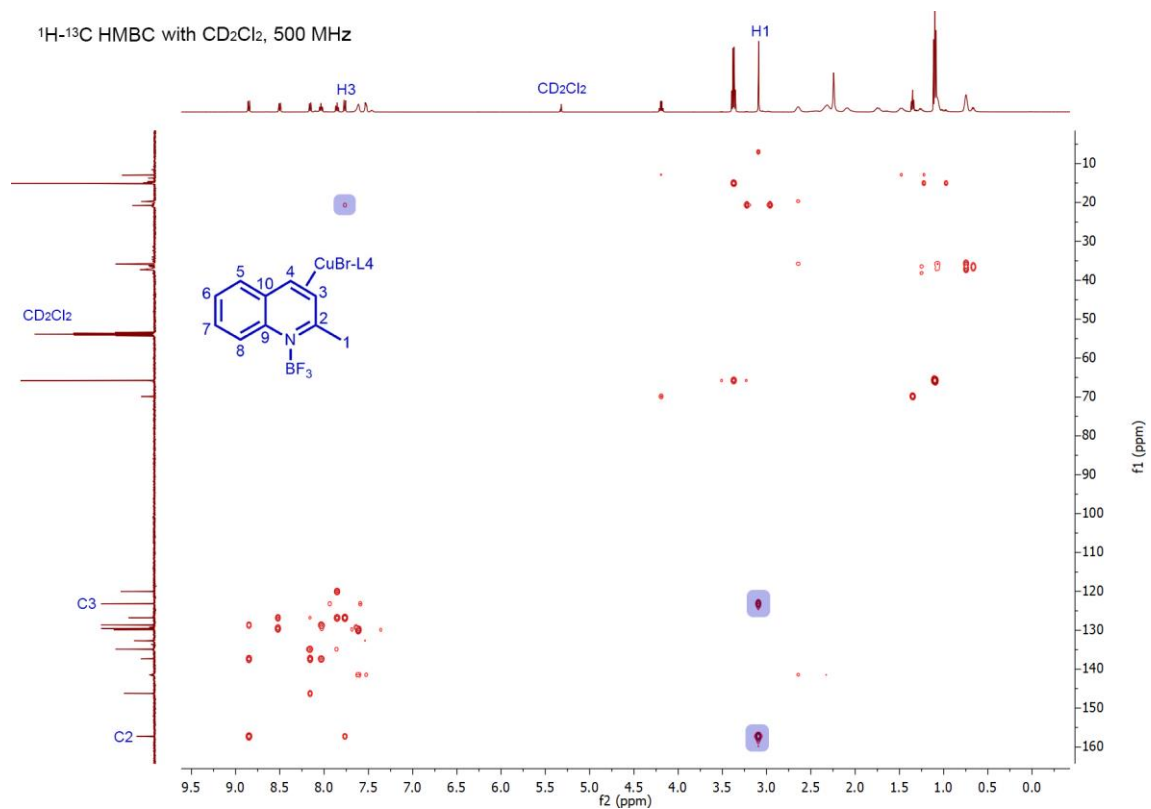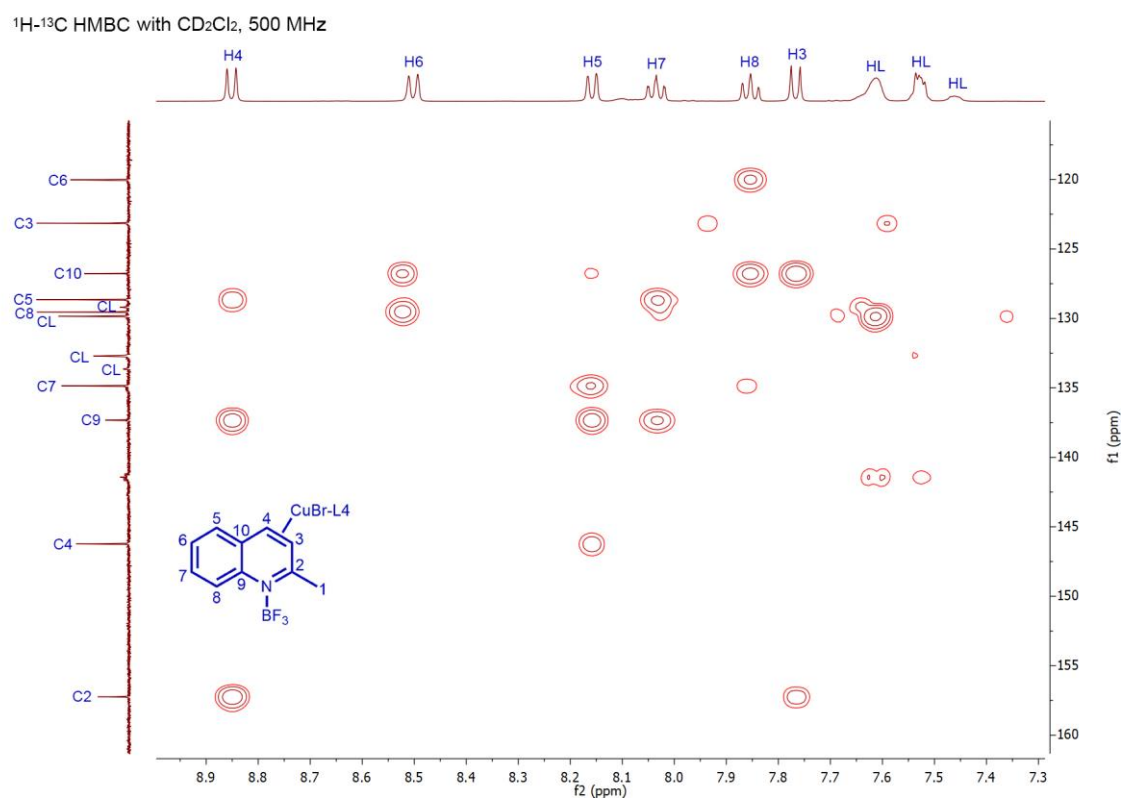

**Figure S32.**  $^1\text{H}$ - $^{13}\text{C}$  HMBC spectrum of the mixture of 2-methyl-quinoline,  $\text{BF}_3 \cdot \text{Et}_2\text{O}$  and L4-CuBr catalyst (top) and amplified aromatic part of  $^1\text{H}$ - $^{13}\text{C}$  HMBC spectra (bottom).

## Comparison of the $^1\text{H}$ NMR spectra of **L4**-CuBr with the mixture of **L4**-CuBr catalyst and $\text{BF}_3\cdot\text{Et}_2\text{O}$

**L4**-CuBr catalyst was added to  $\text{CD}_2\text{Cl}_2$  in a dry NMR tube at  $-50\text{ }^\circ\text{C}$  under  $\text{N}_2$  atmosphere, and immediately measured by NMR spectroscopy at  $-50\text{ }^\circ\text{C}$ . 2 Equiv. of  $\text{BF}_3\cdot\text{Et}_2\text{O}$  was added to a solution of **L4**-CuBr in  $\text{CD}_2\text{Cl}_2$  in a dry NMR tube at  $-50\text{ }^\circ\text{C}$  under  $\text{N}_2$  atmosphere, and immediately measured by NMR spectroscopy at  $-50\text{ }^\circ\text{C}$ . Comparison were made for  $^1\text{H}$  NMR (Figure S33),  $^{13}\text{C}$  NMR (Figure S34) and  $^{31}\text{P}$  NMR (Figure S35). The peaks of **L4**-CuBr catalyst for  $^1\text{H}$  NMR,  $^{13}\text{C}$  NMR and  $^{31}\text{P}$  NMR have no shifted after addition of  $\text{BF}_3\cdot\text{Et}_2\text{O}$ , indicating that  $\text{BF}_3$  cannot displace CuBr to coordinate with **L4**.

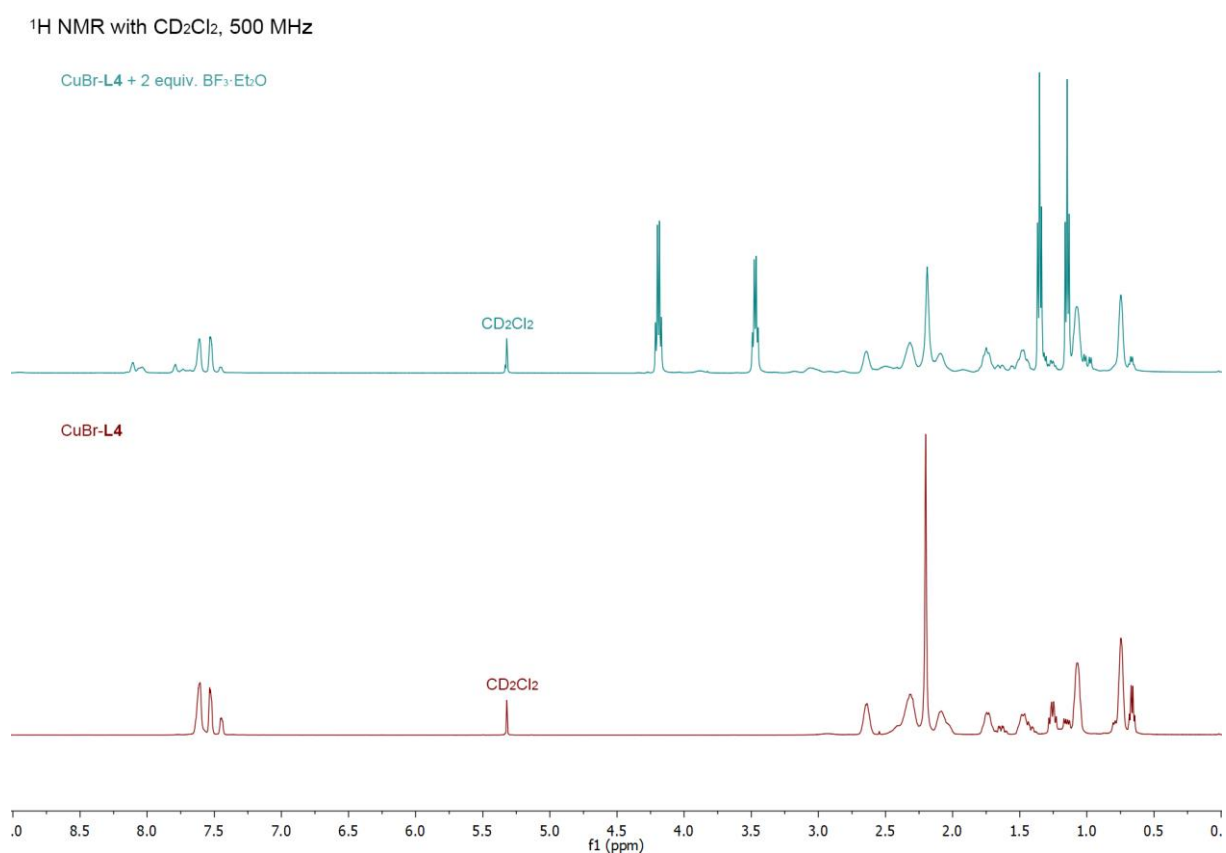

**Figure S33.** Comparison of the  $^1\text{H}$  NMR spectra of **L4**-CuBr with the mixture of **L4**-CuBr catalyst and  $\text{BF}_3\cdot\text{Et}_2\text{O}$ .

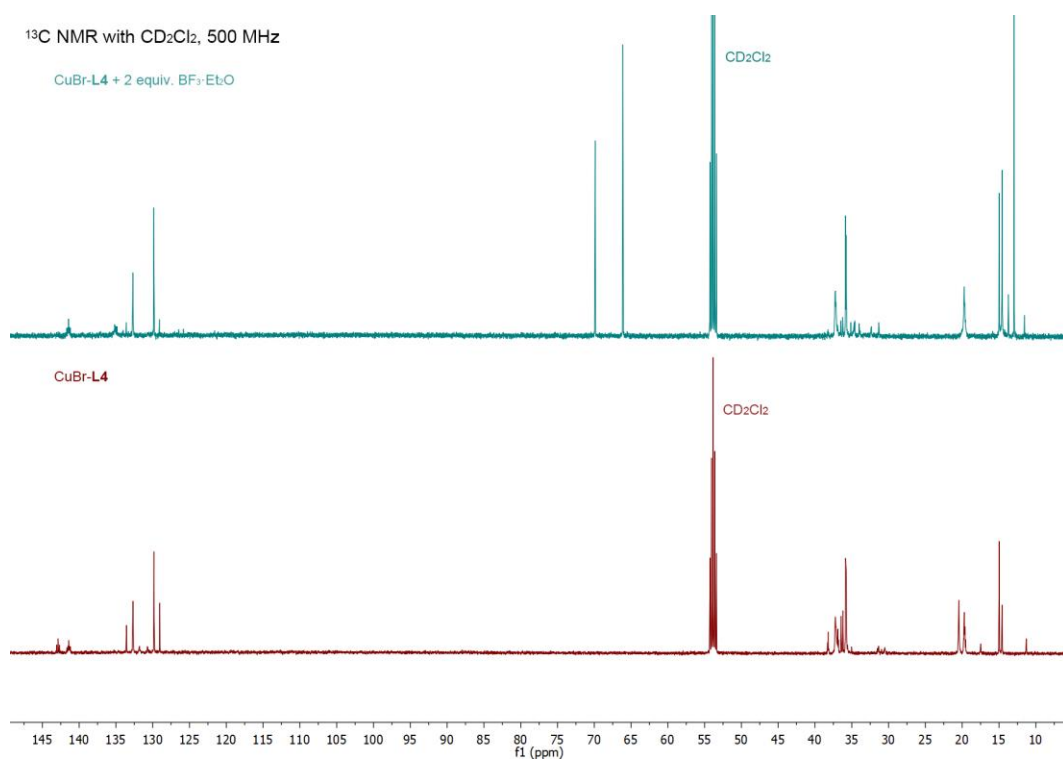

**Figure S34.** Comparison of the <sup>13</sup>C NMR spectra of L4-CuBr with the mixture of L4-CuBr catalyst and BF<sub>3</sub>·Et<sub>2</sub>O.

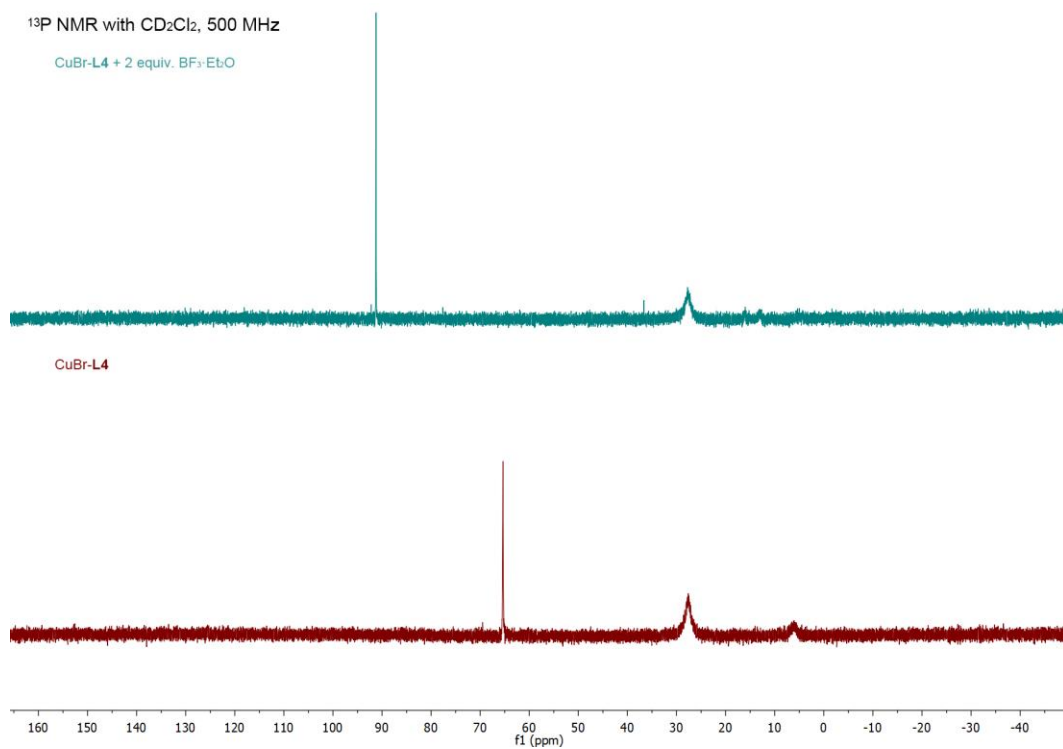

**Figure S35.** Comparison of the <sup>31</sup>P NMR spectra of L4-CuBr with the mixture of L4-CuBr catalyst and BF<sub>3</sub>·Et<sub>2</sub>O.

## 10. NMR spectra

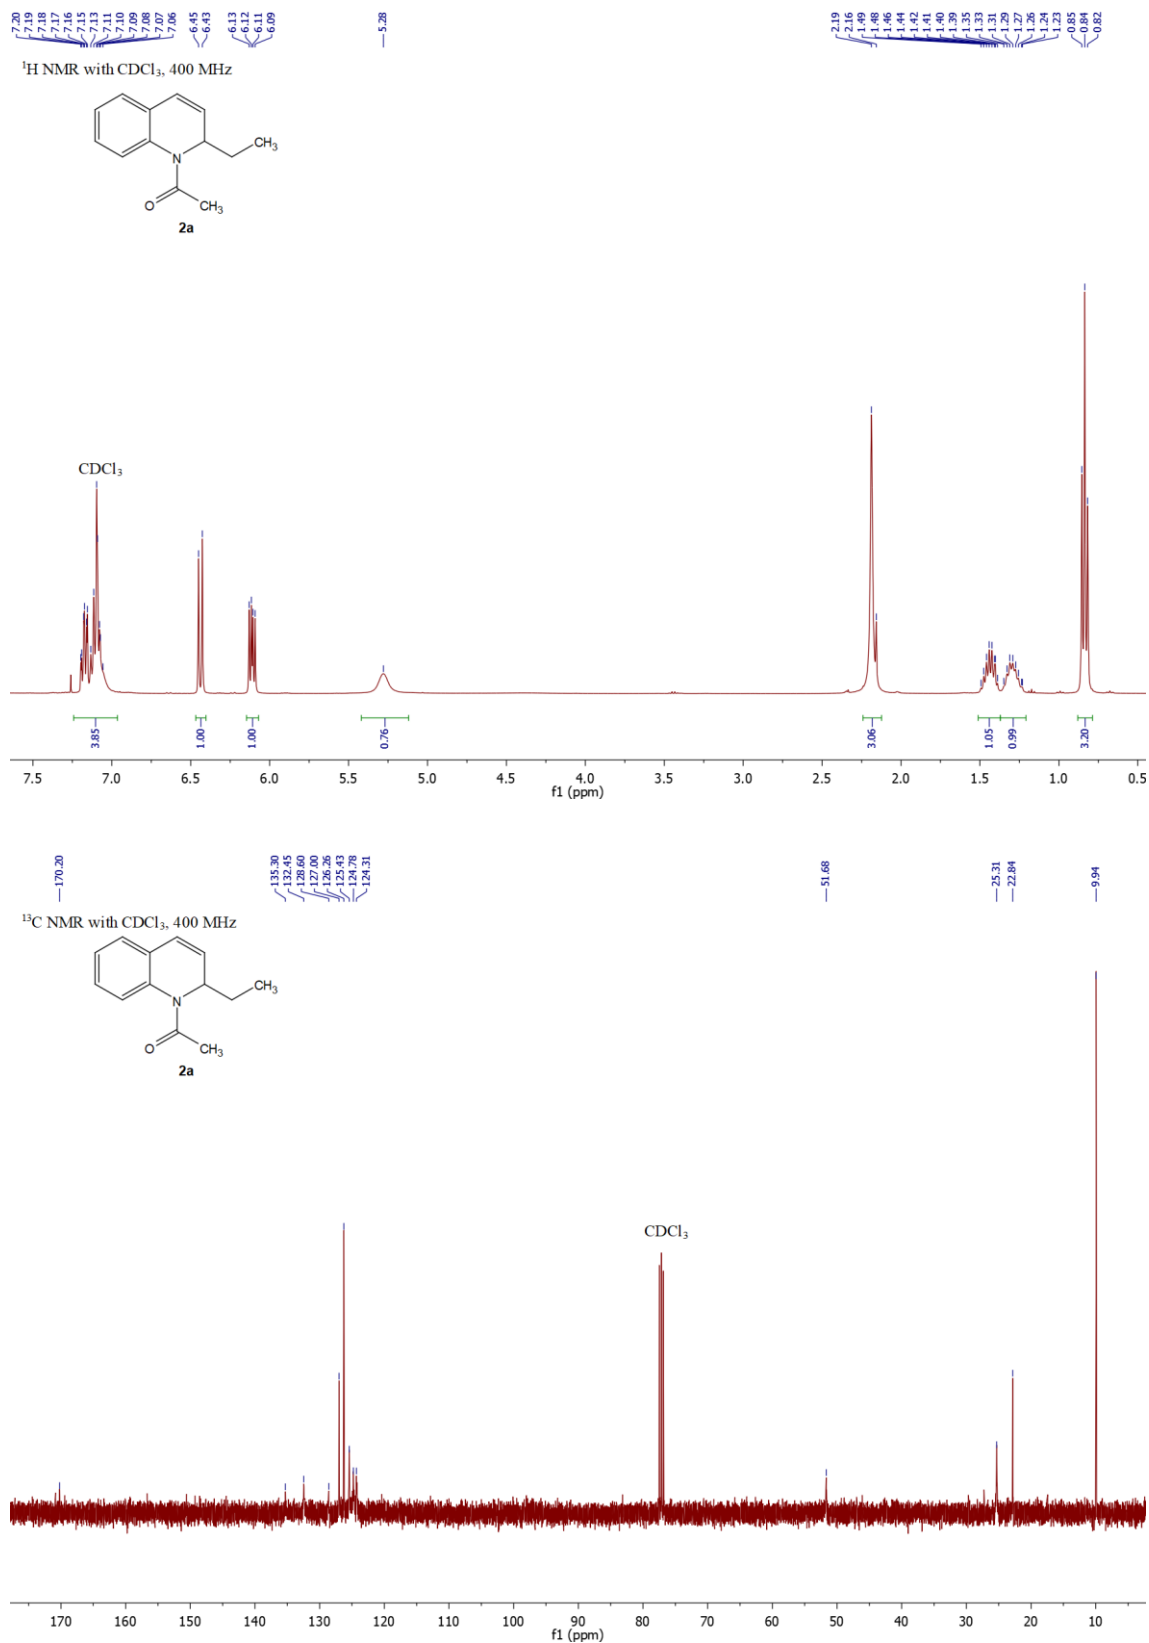

Figure S36. NMR spectra of 1-acetyl-2-ethyl-C2-dihydroquinoline (**2a**)

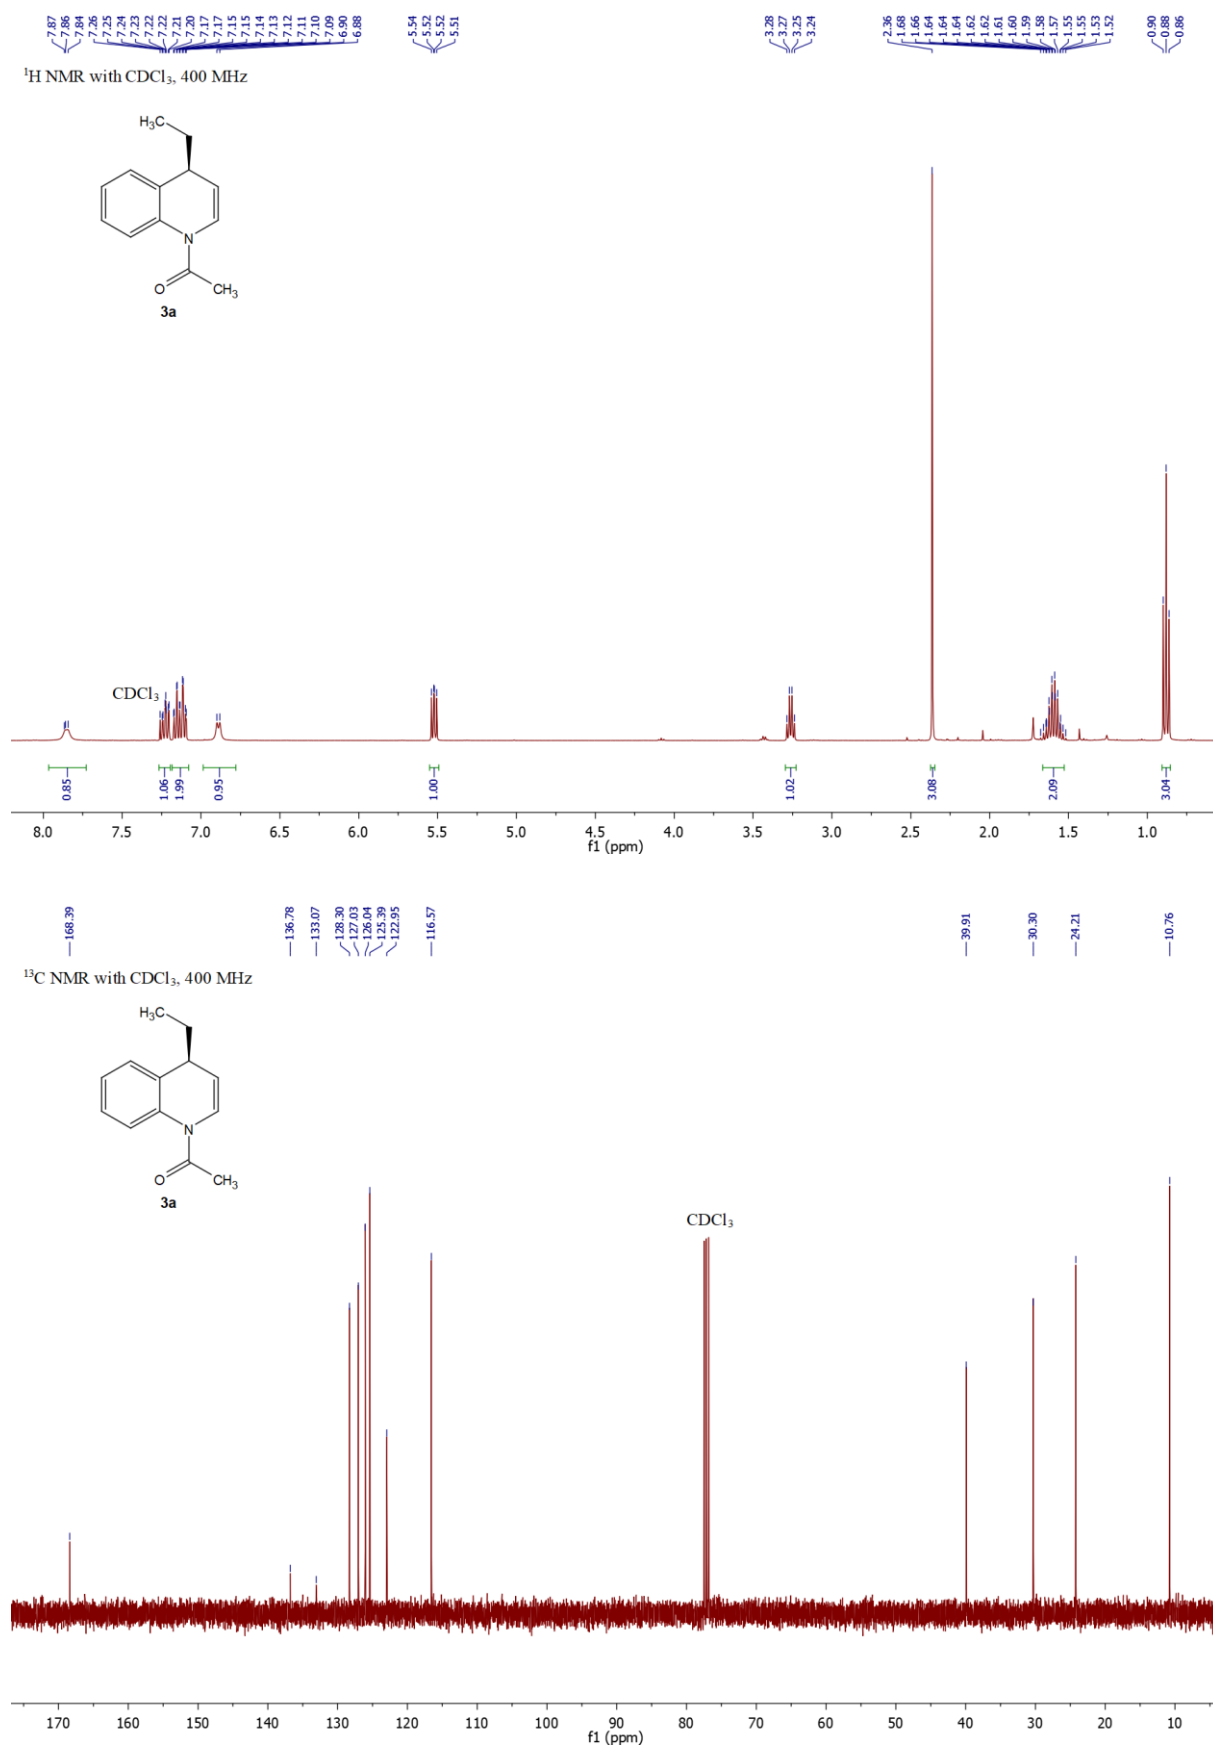

**Figure S37.** NMR spectra of (*S*)-1-acetyl-4-ethyl-C4-dihydroquinoline (**3a**)

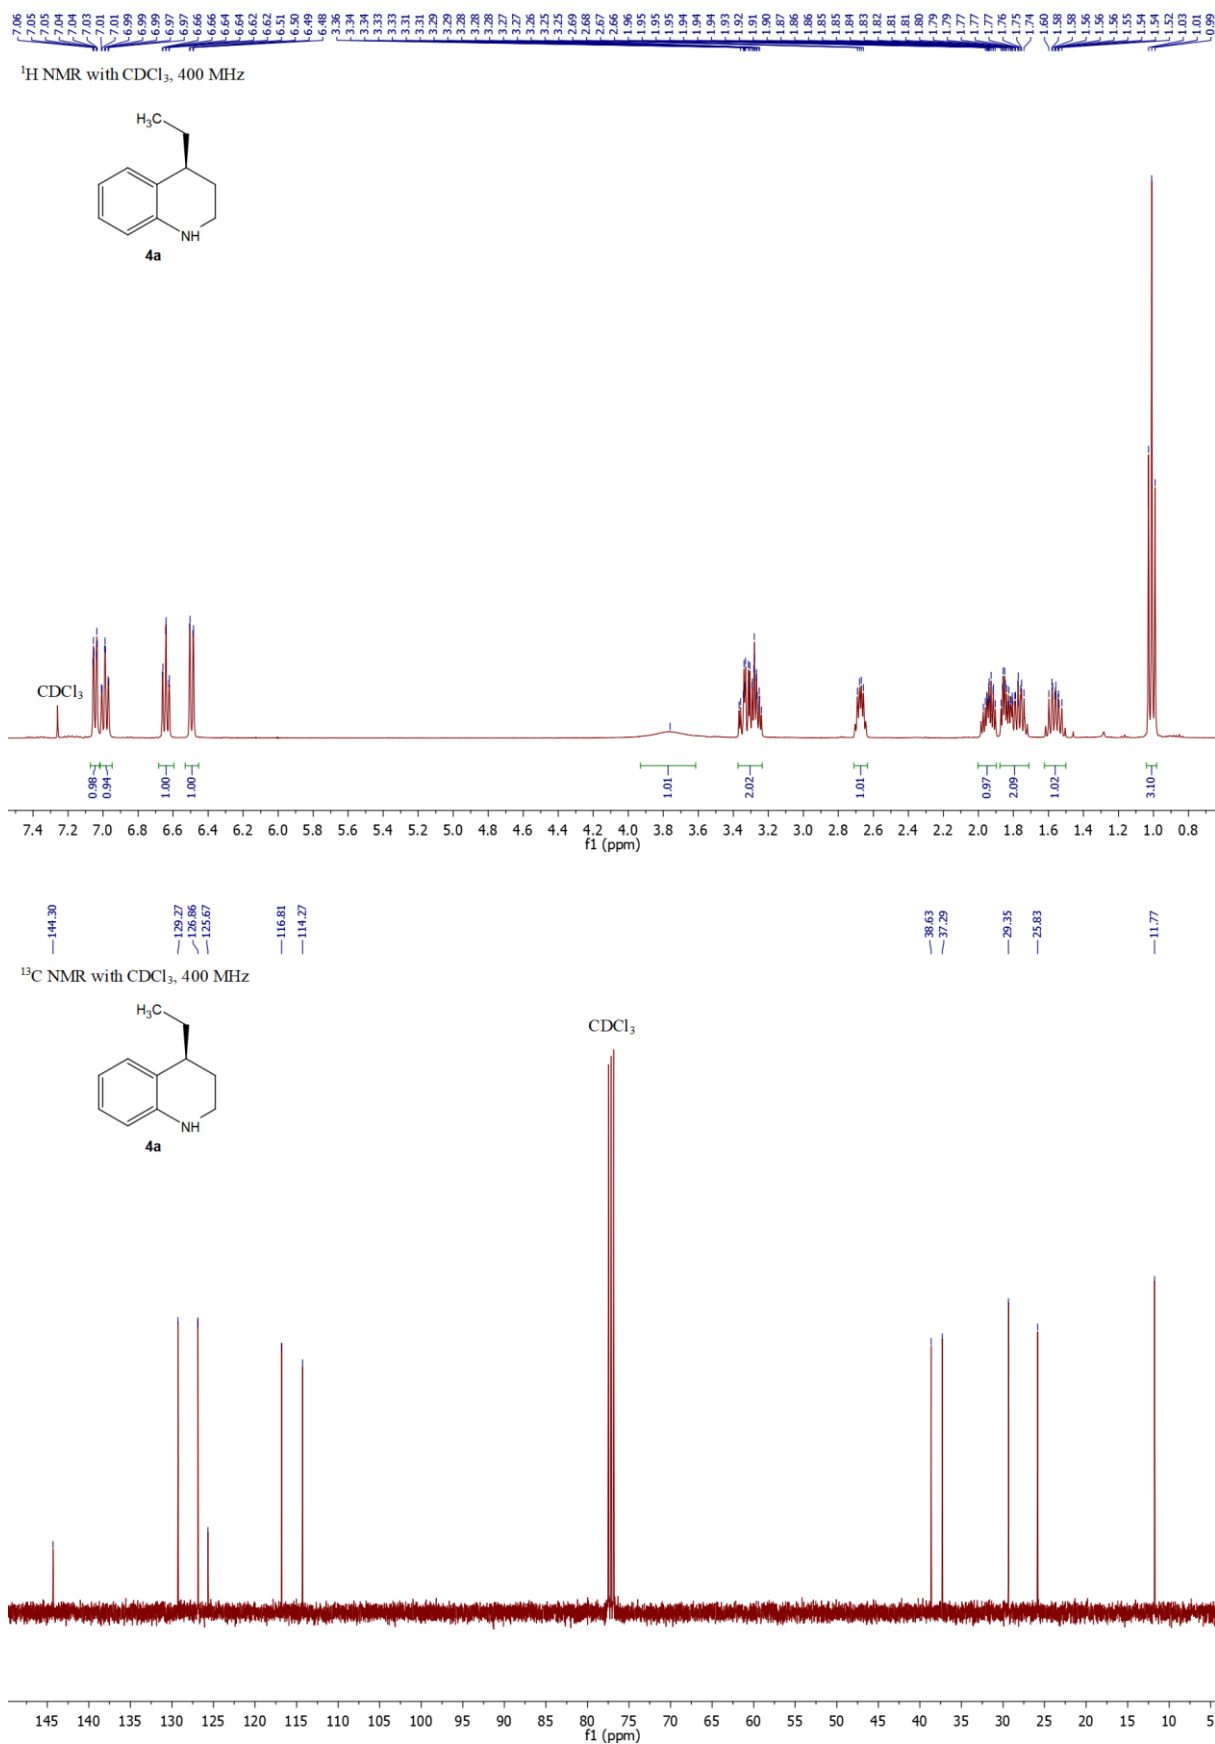

Figure S38. NMR spectra of (*S*)-4-Ethyl-1,2,3,4-tetrahydroquinoline (**4a**)

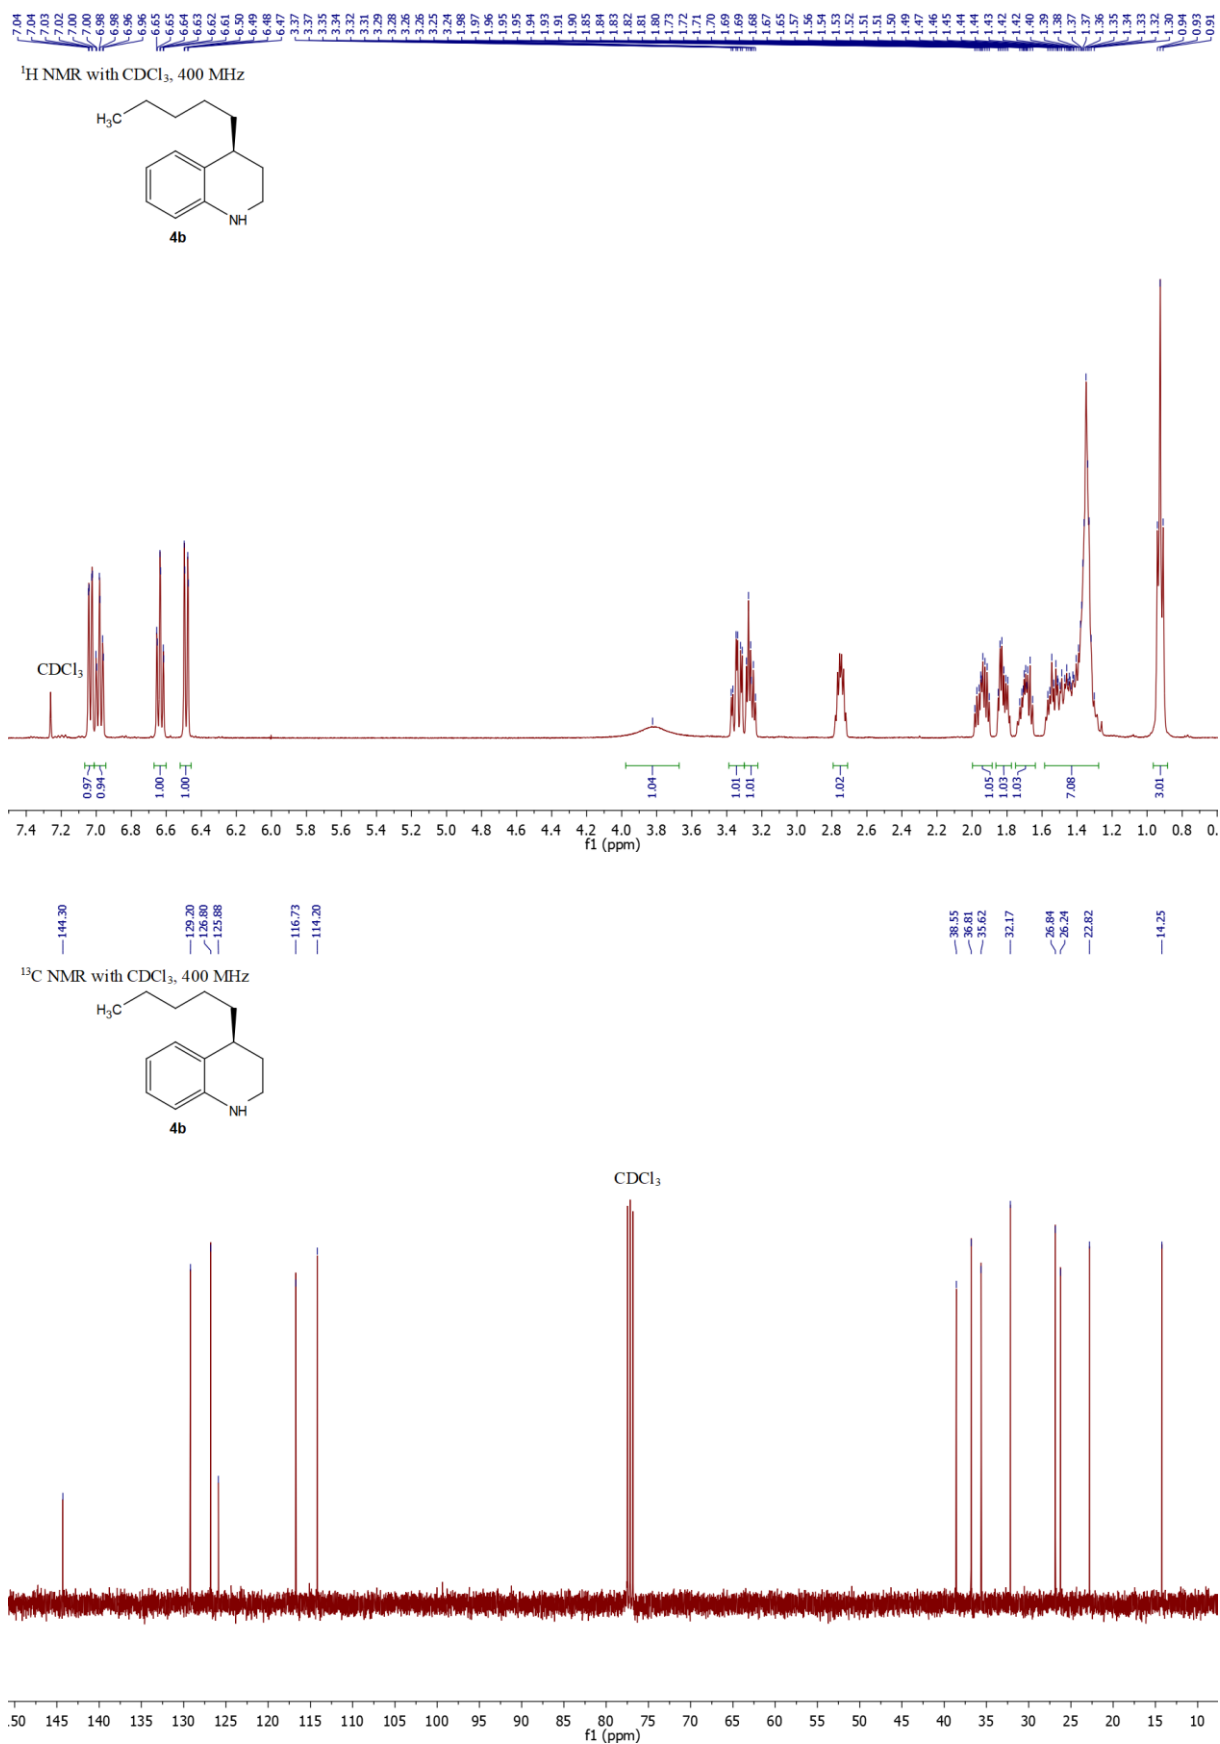

**Figure S39.** NMR spectra of (*S*)-4-Pentyl-1,2,3,4-tetrahydroquinoline (**4b**)



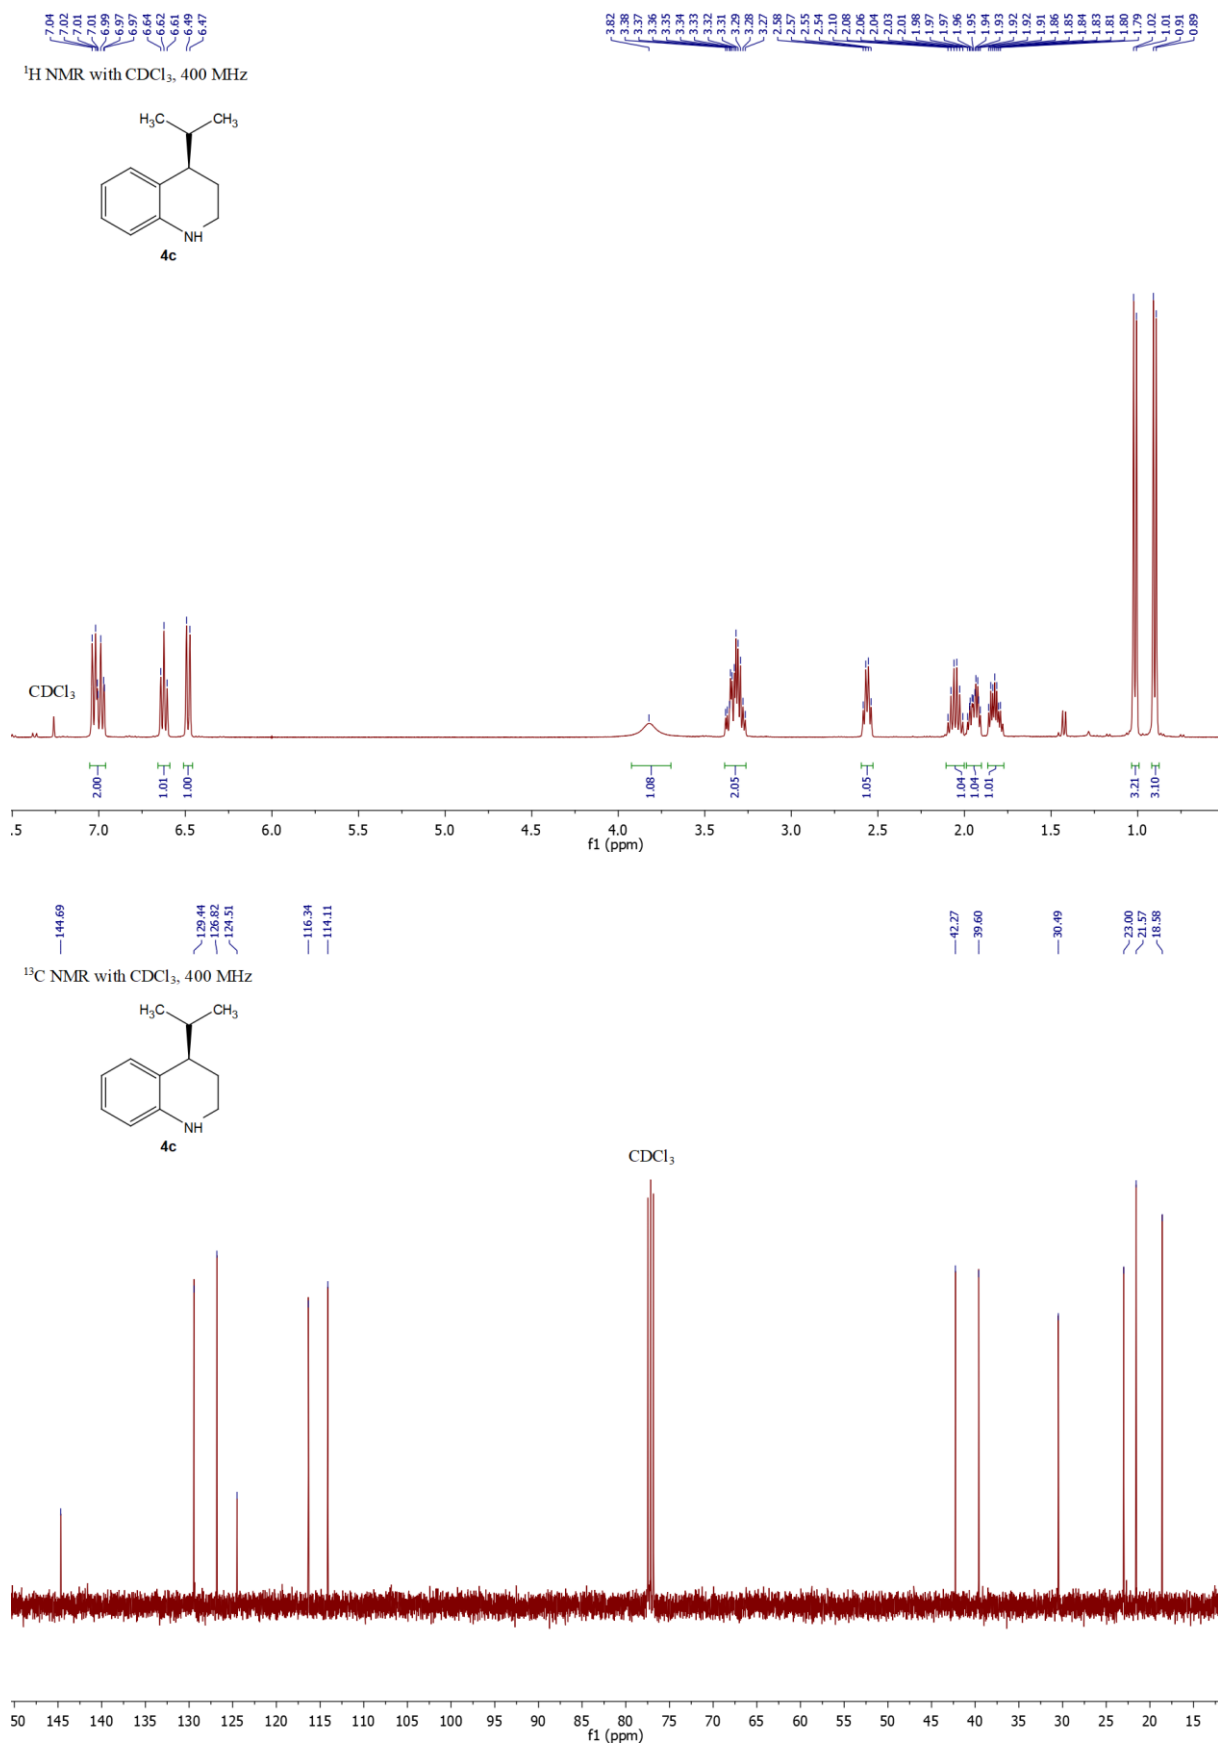

**Figure S40.** NMR spectra of (*R*)-4-(1-methylethyl)-1,2,3,4-tetrahydroquinoline (**4c**)

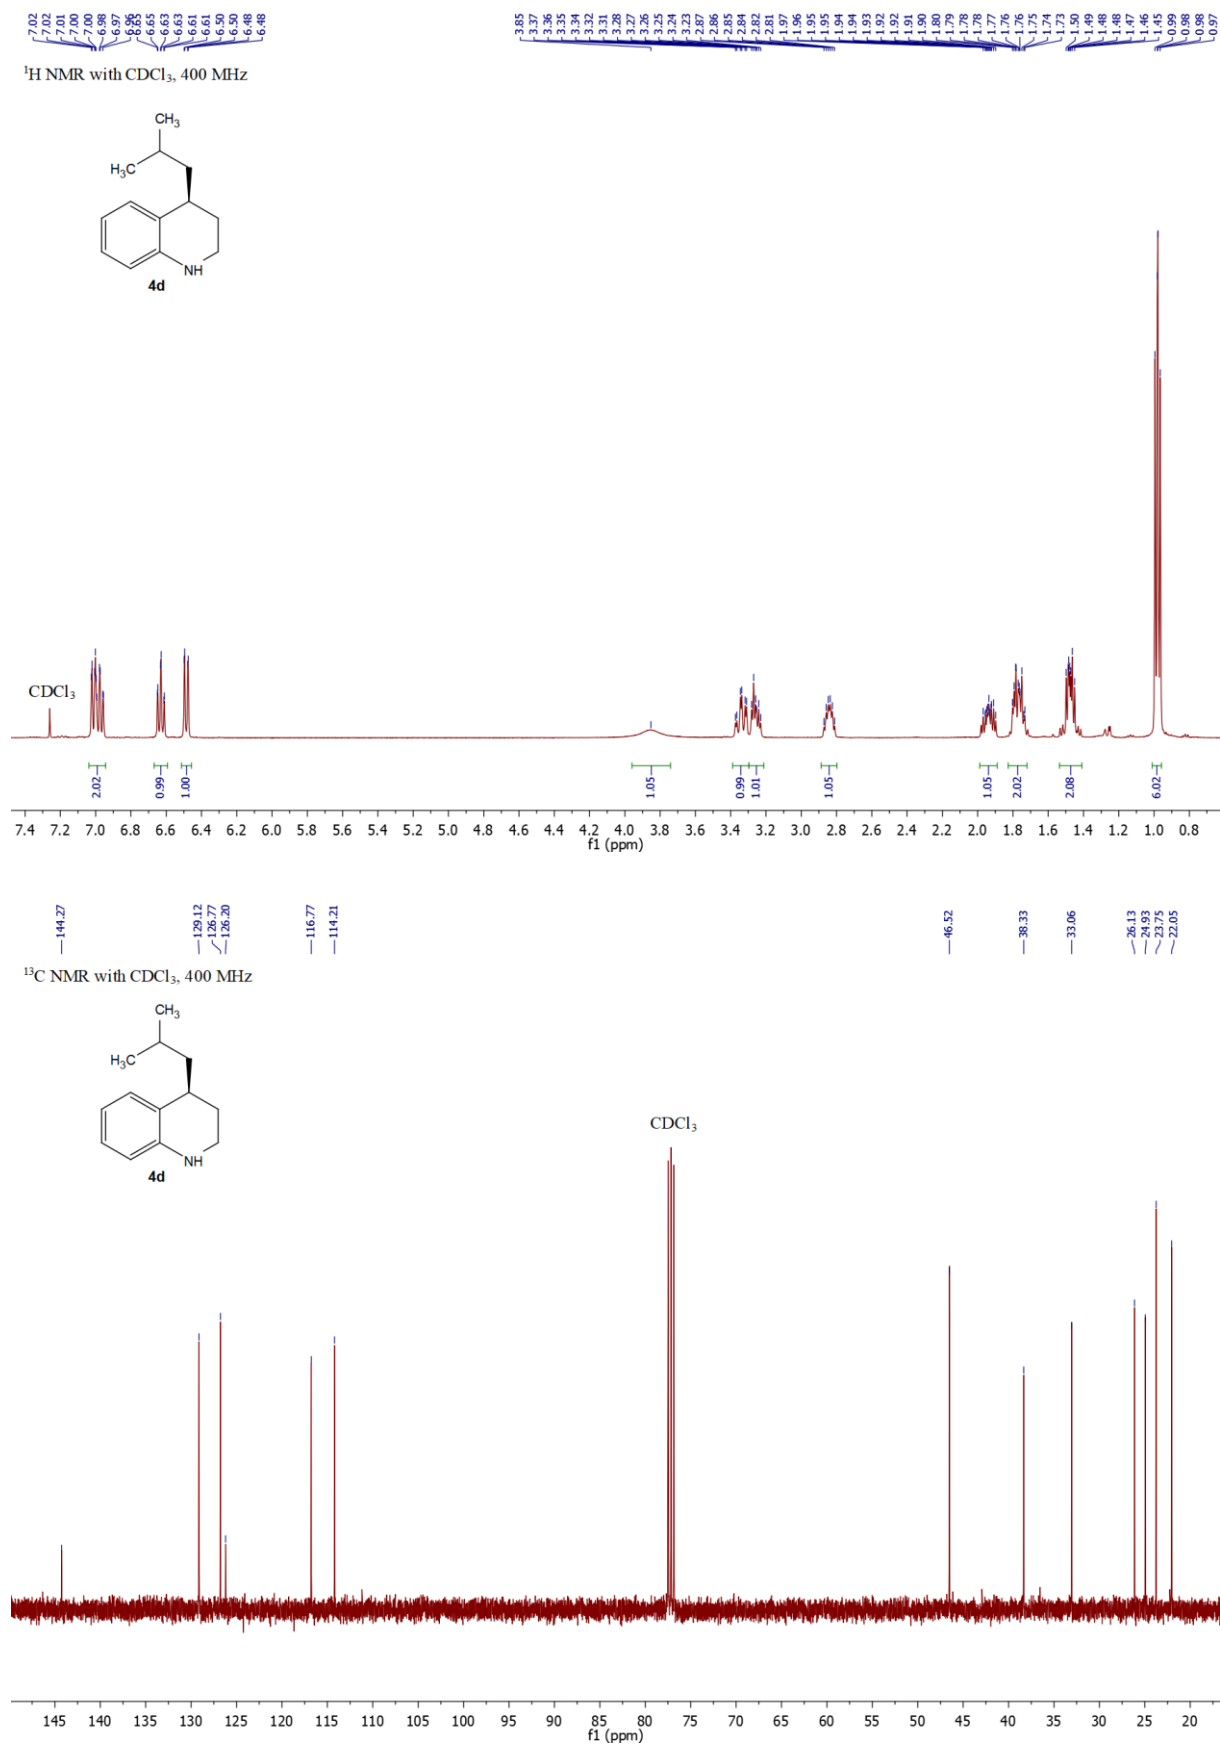

**Figure S41.** NMR spectra of (*S*)-4-(2-methylpropyl)-1,2,3,4-tetrahydroquinoline (**4d**)

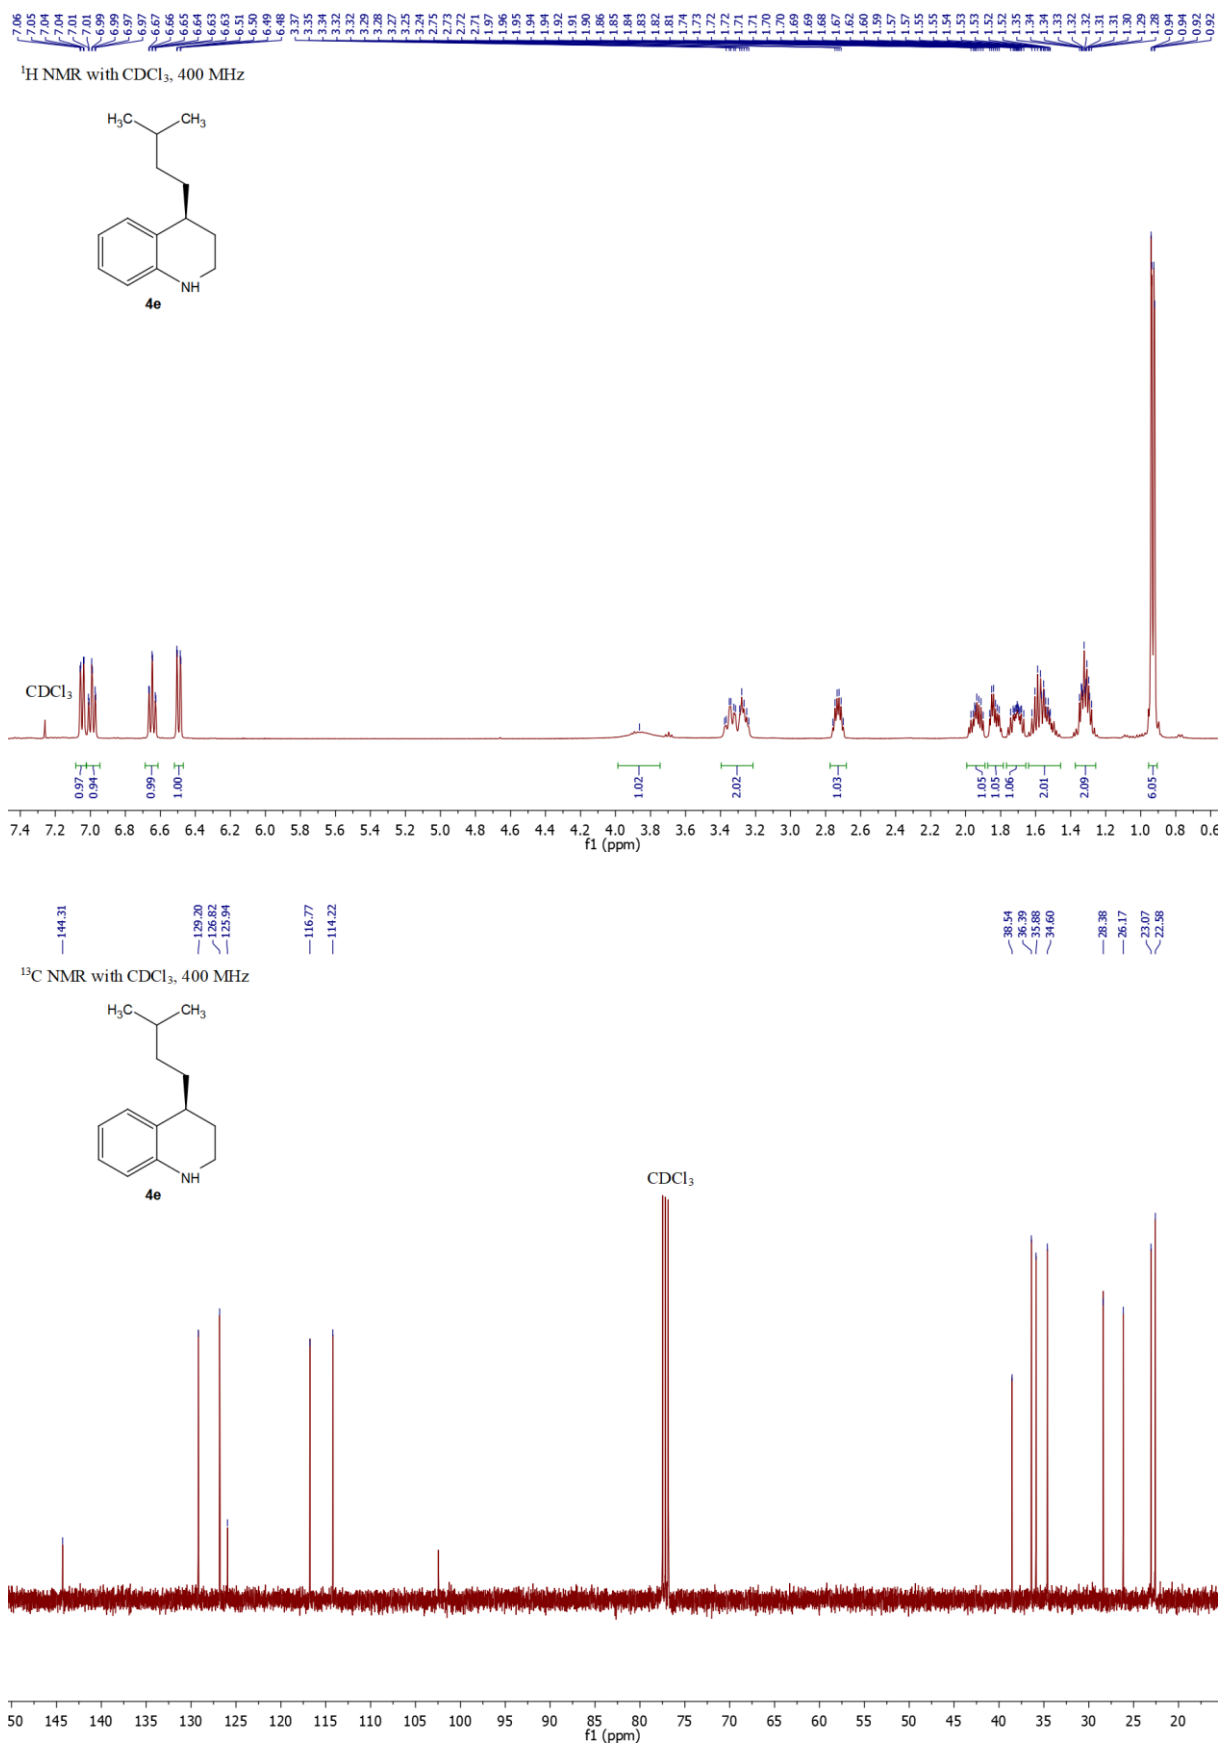

**Figure S42.** NMR spectra of (*S*)-4-(3-methylbutyl)-1,2,3,4-tetrahydroquinoline (**4e**)

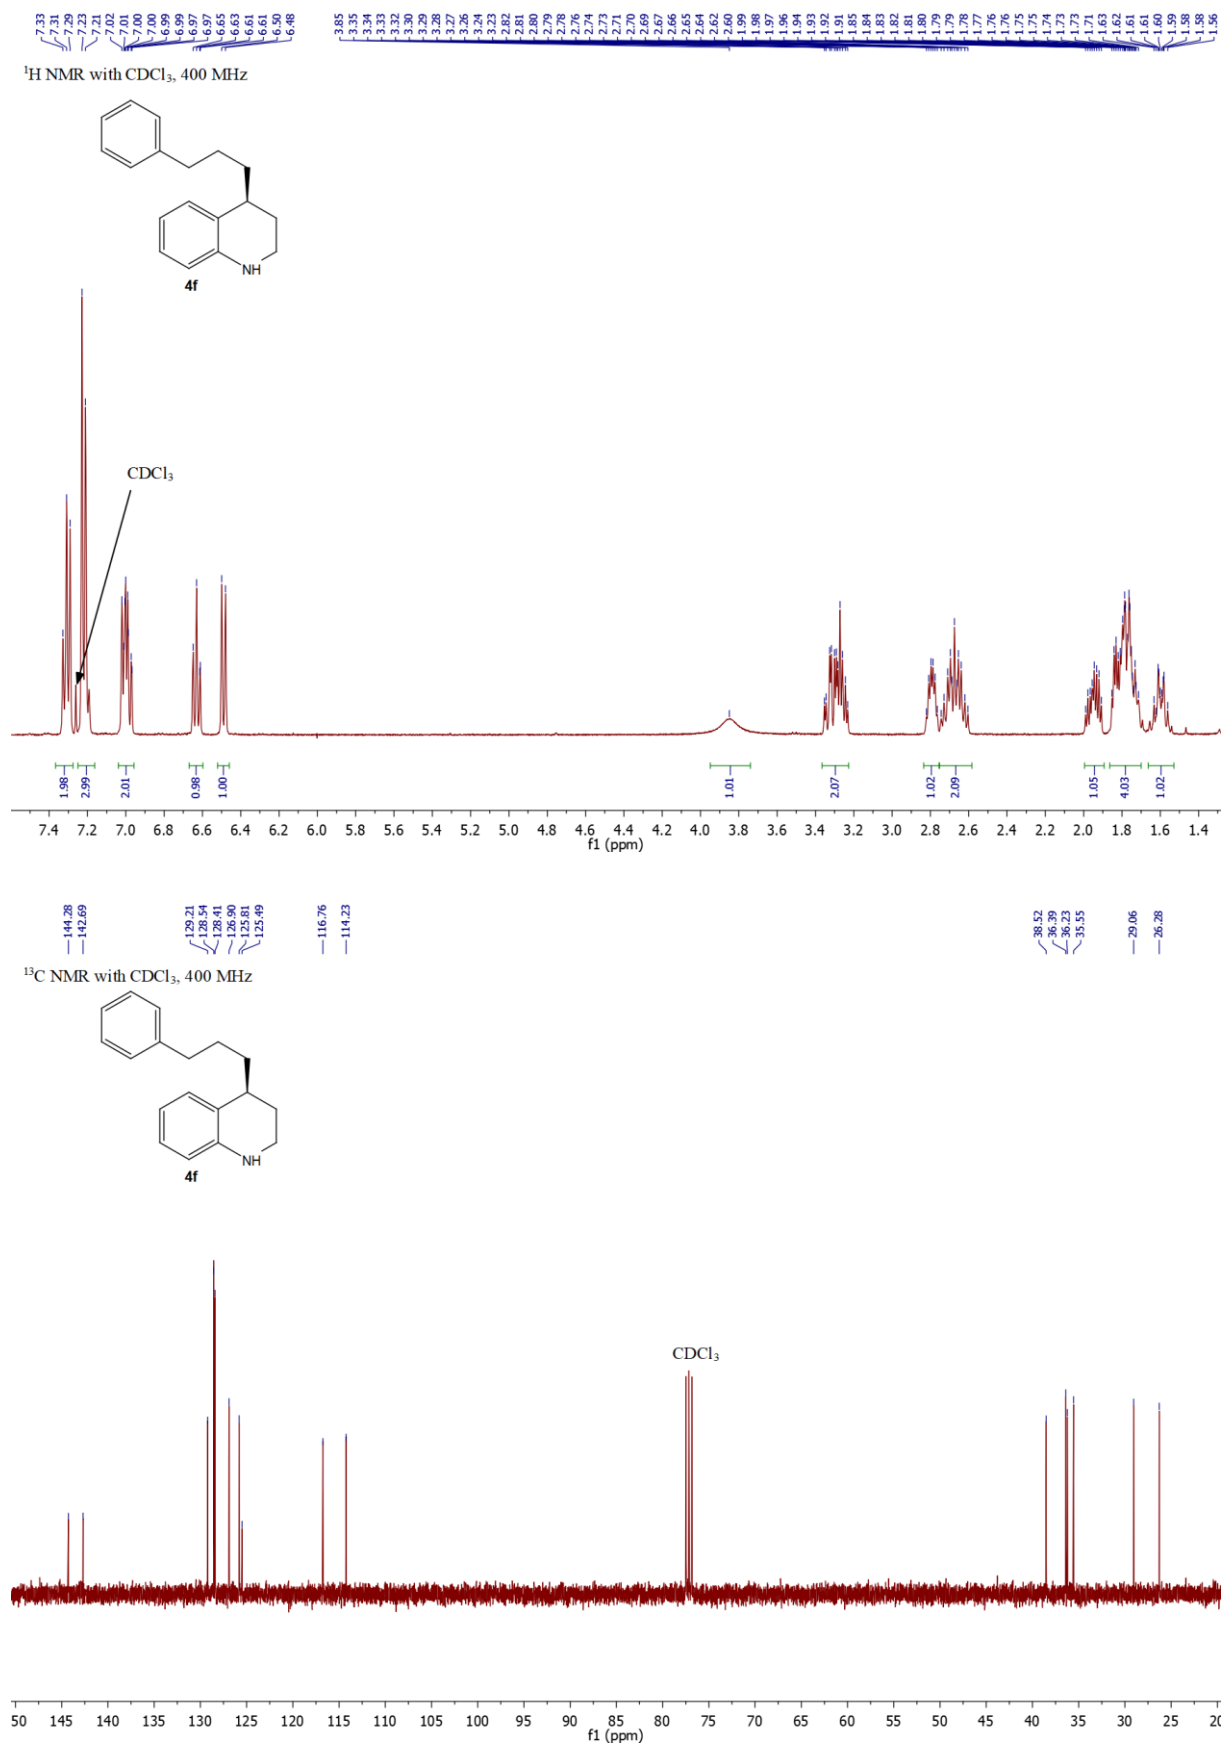

**Figure S43.** NMR spectra of (*S*)-4-(3-Phenylpropyl)-1,2,3,4-tetrahydroquinoline (**4f**)

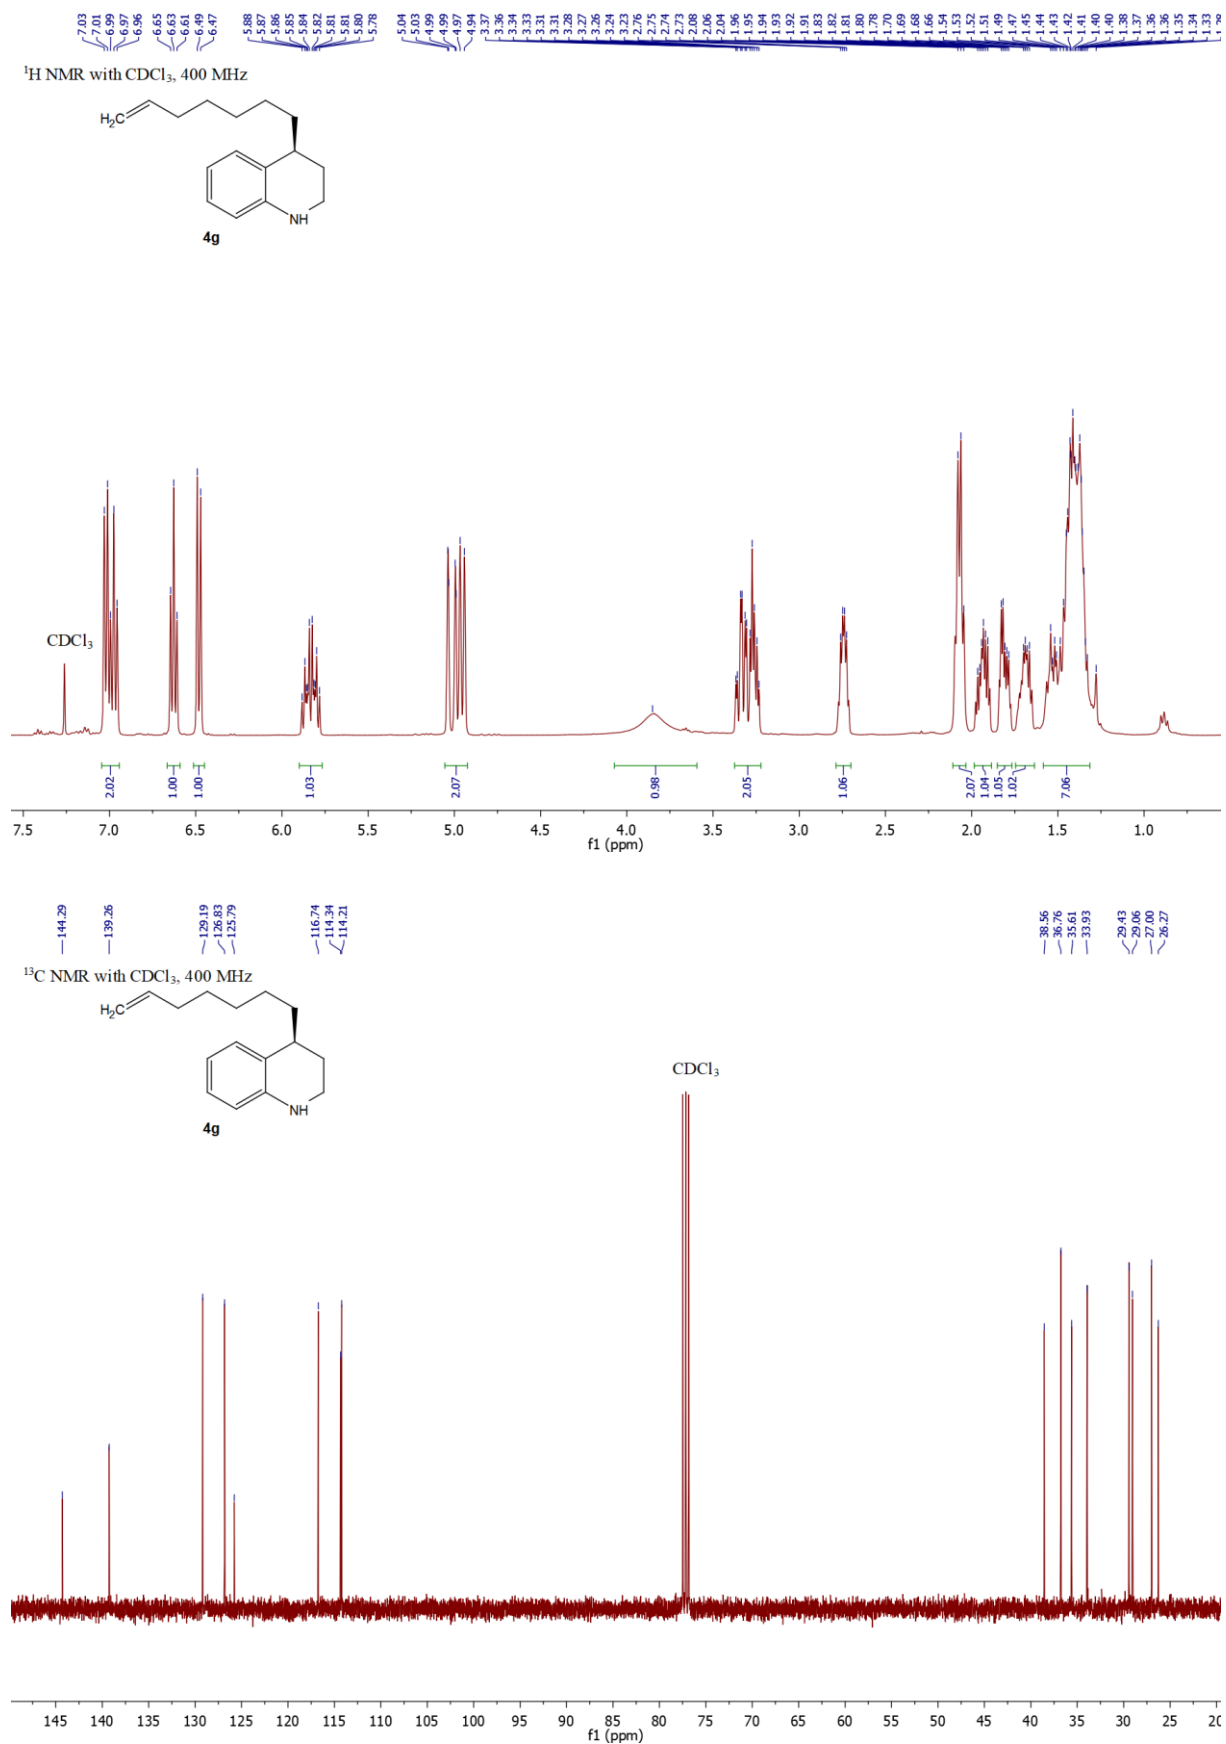

**Figure S44.** NMR spectra of (*S*)-4-(Hept-6-en-1-yl)-1,2,3,4-tetrahydroquinoline (**4g**)

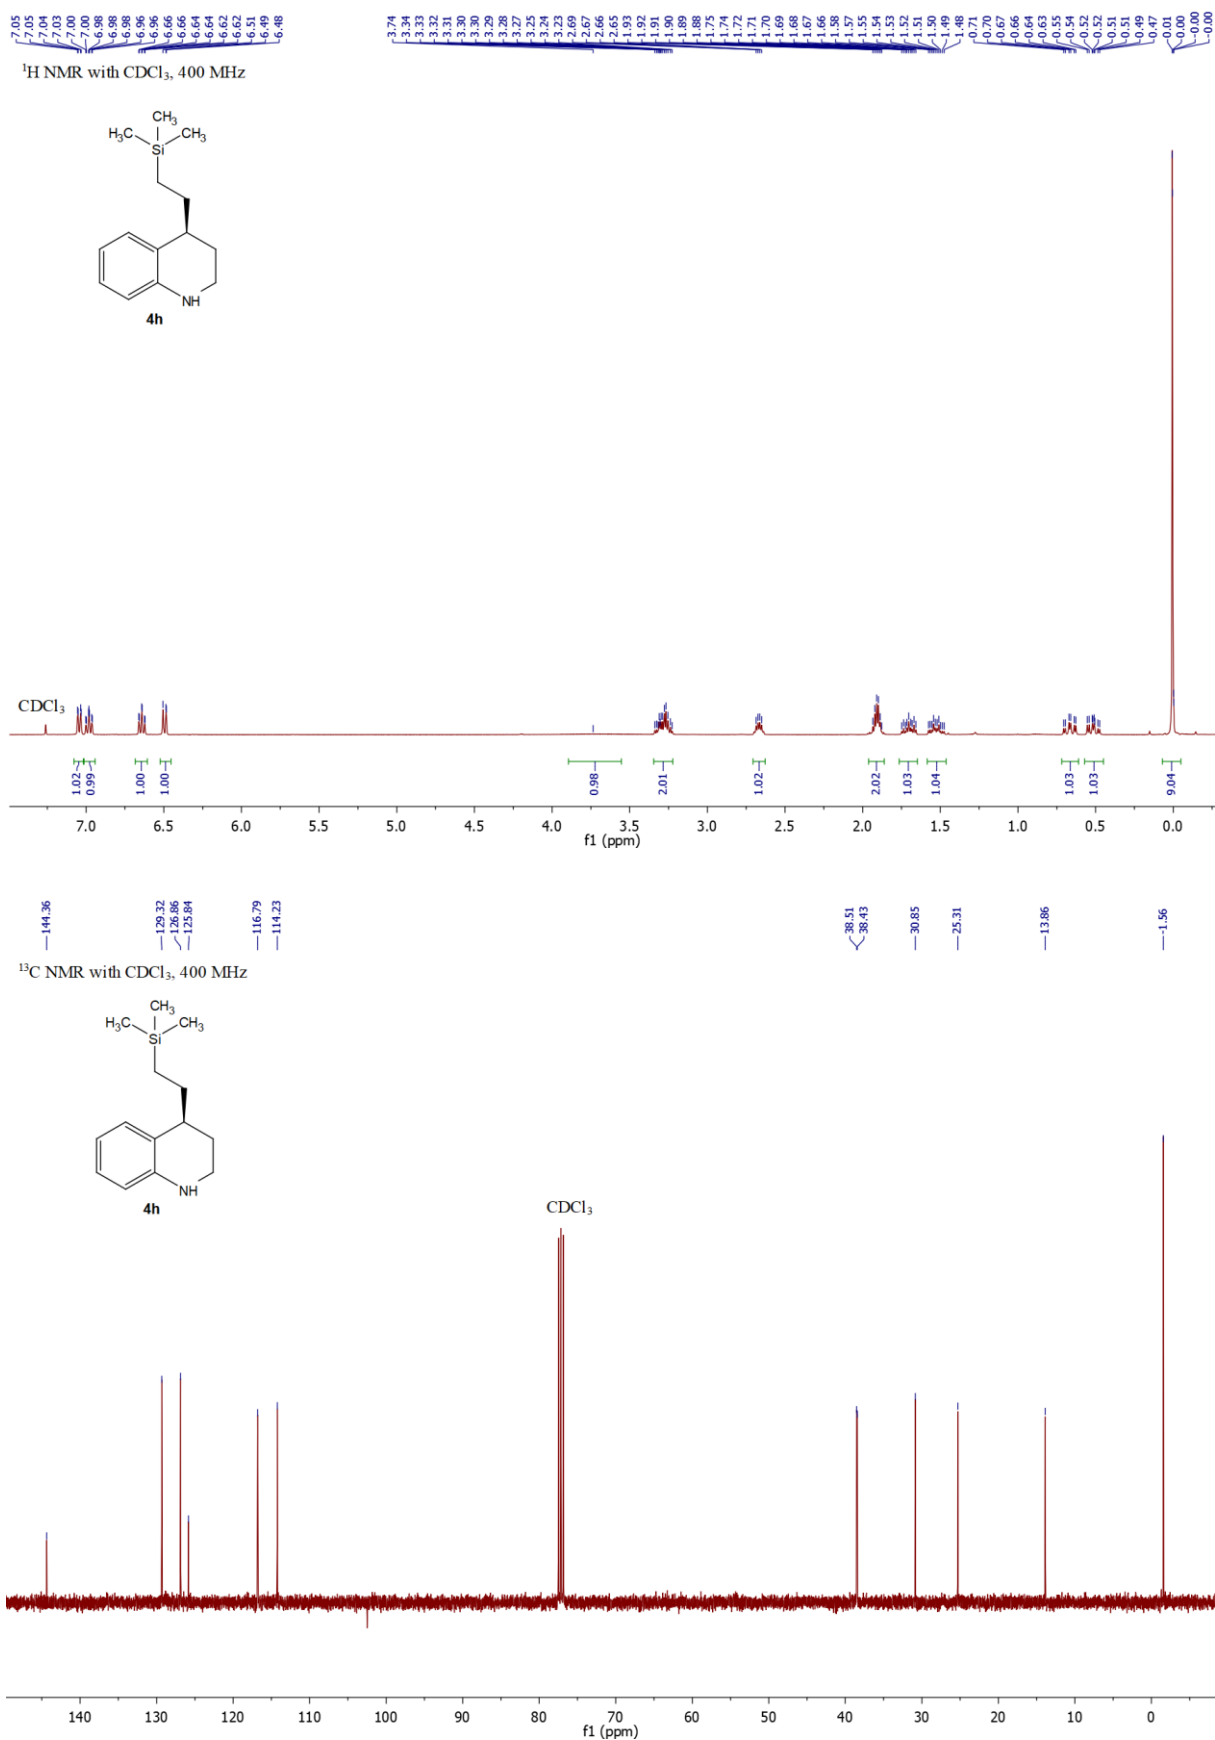

**Figure S45.** NMR spectra of (*R*)-4-(2-Trimethylsilyl)ethyl-1,2,3,4-tetrahydroquinoline (**4h**)



<sup>19</sup>F NMR with CDCl<sub>3</sub>, 400 MHz

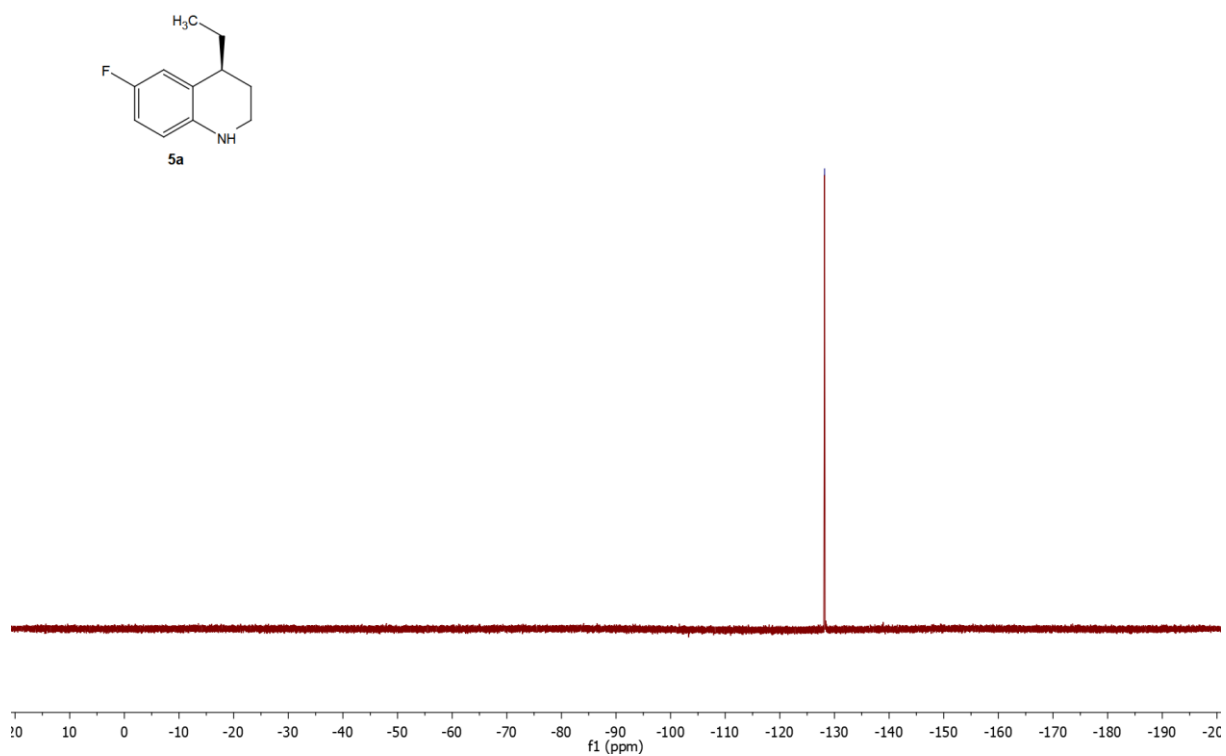

**Figure S46.** NMR spectra of (*S*)-4-Ethyl-6-fluoro-1,2,3,4-tetrahydroquinoline (**5a**)



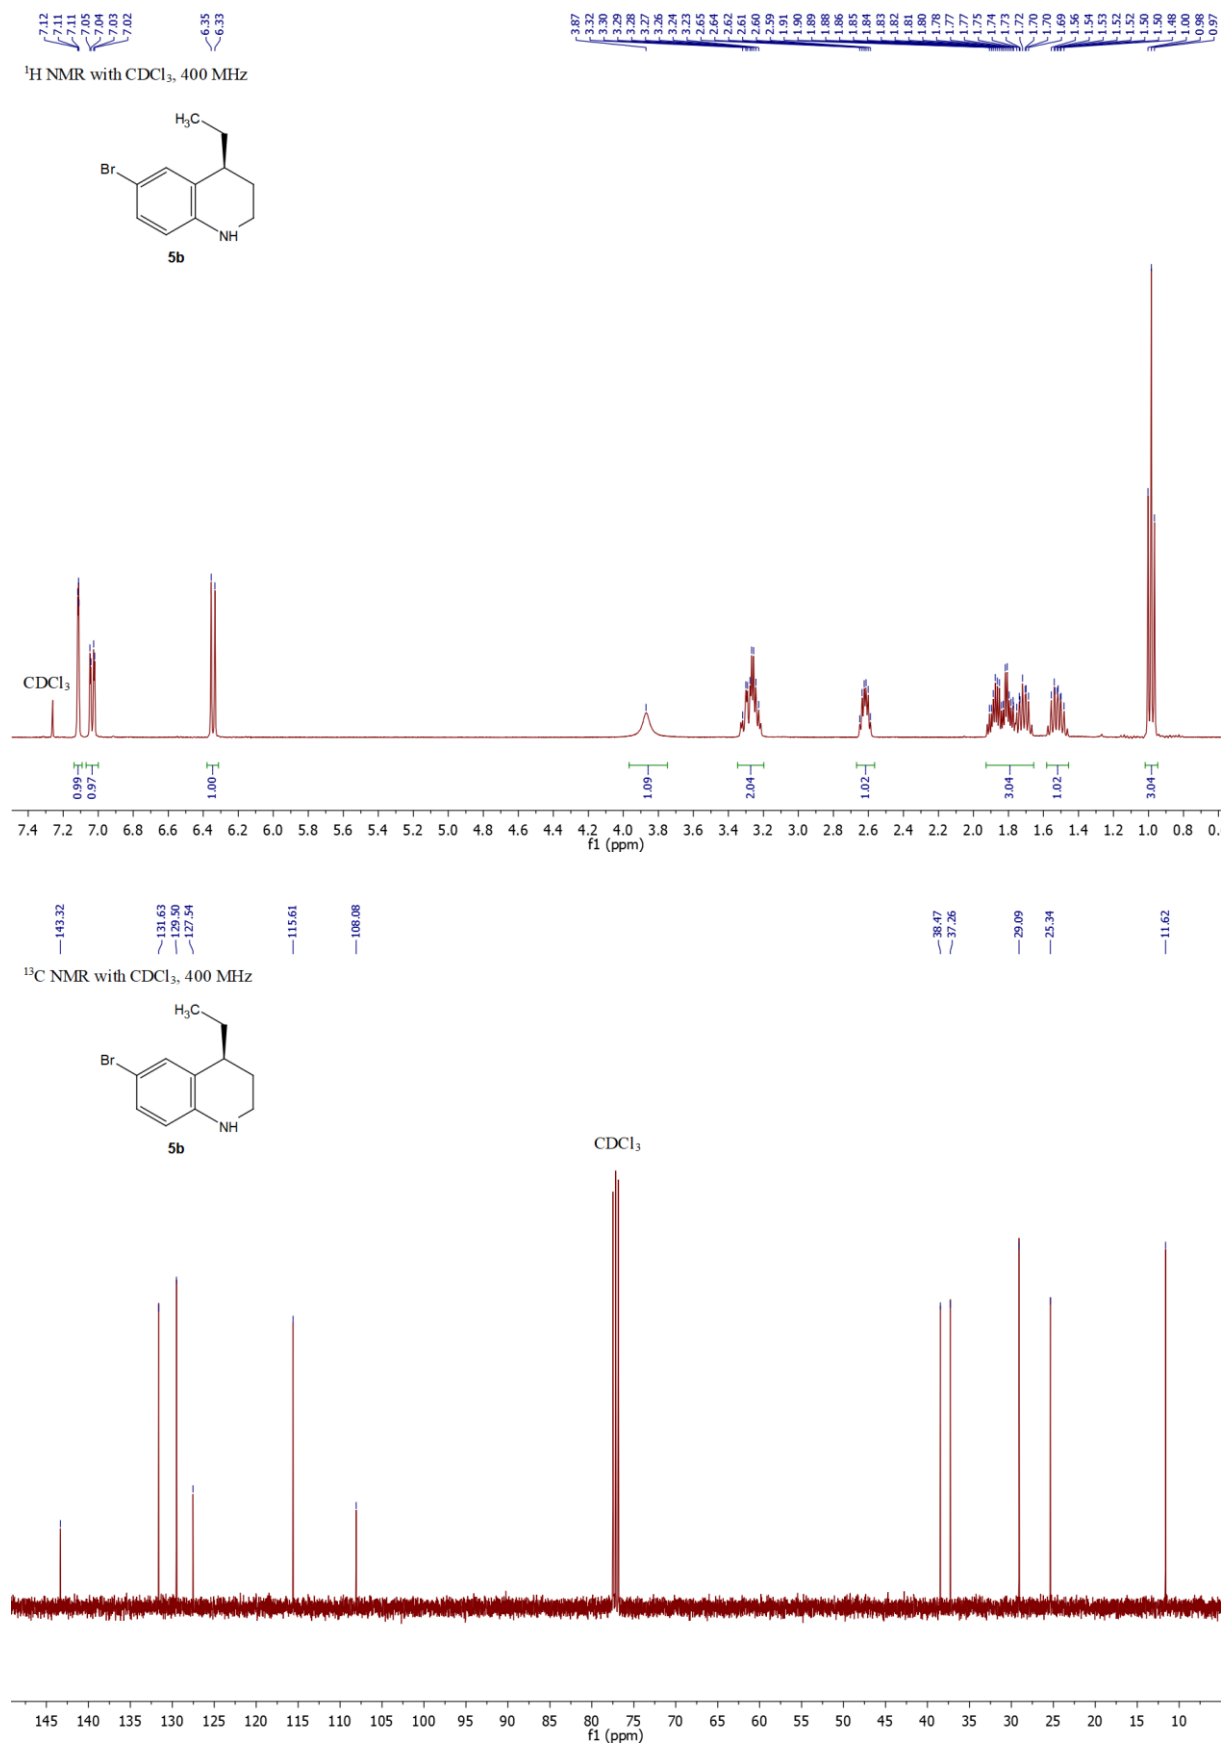

**Figure S47.** NMR spectra of (*S*)-6-Bromo-4-ethyl-1,2,3,4-tetrahydroquinoline (**5b**)

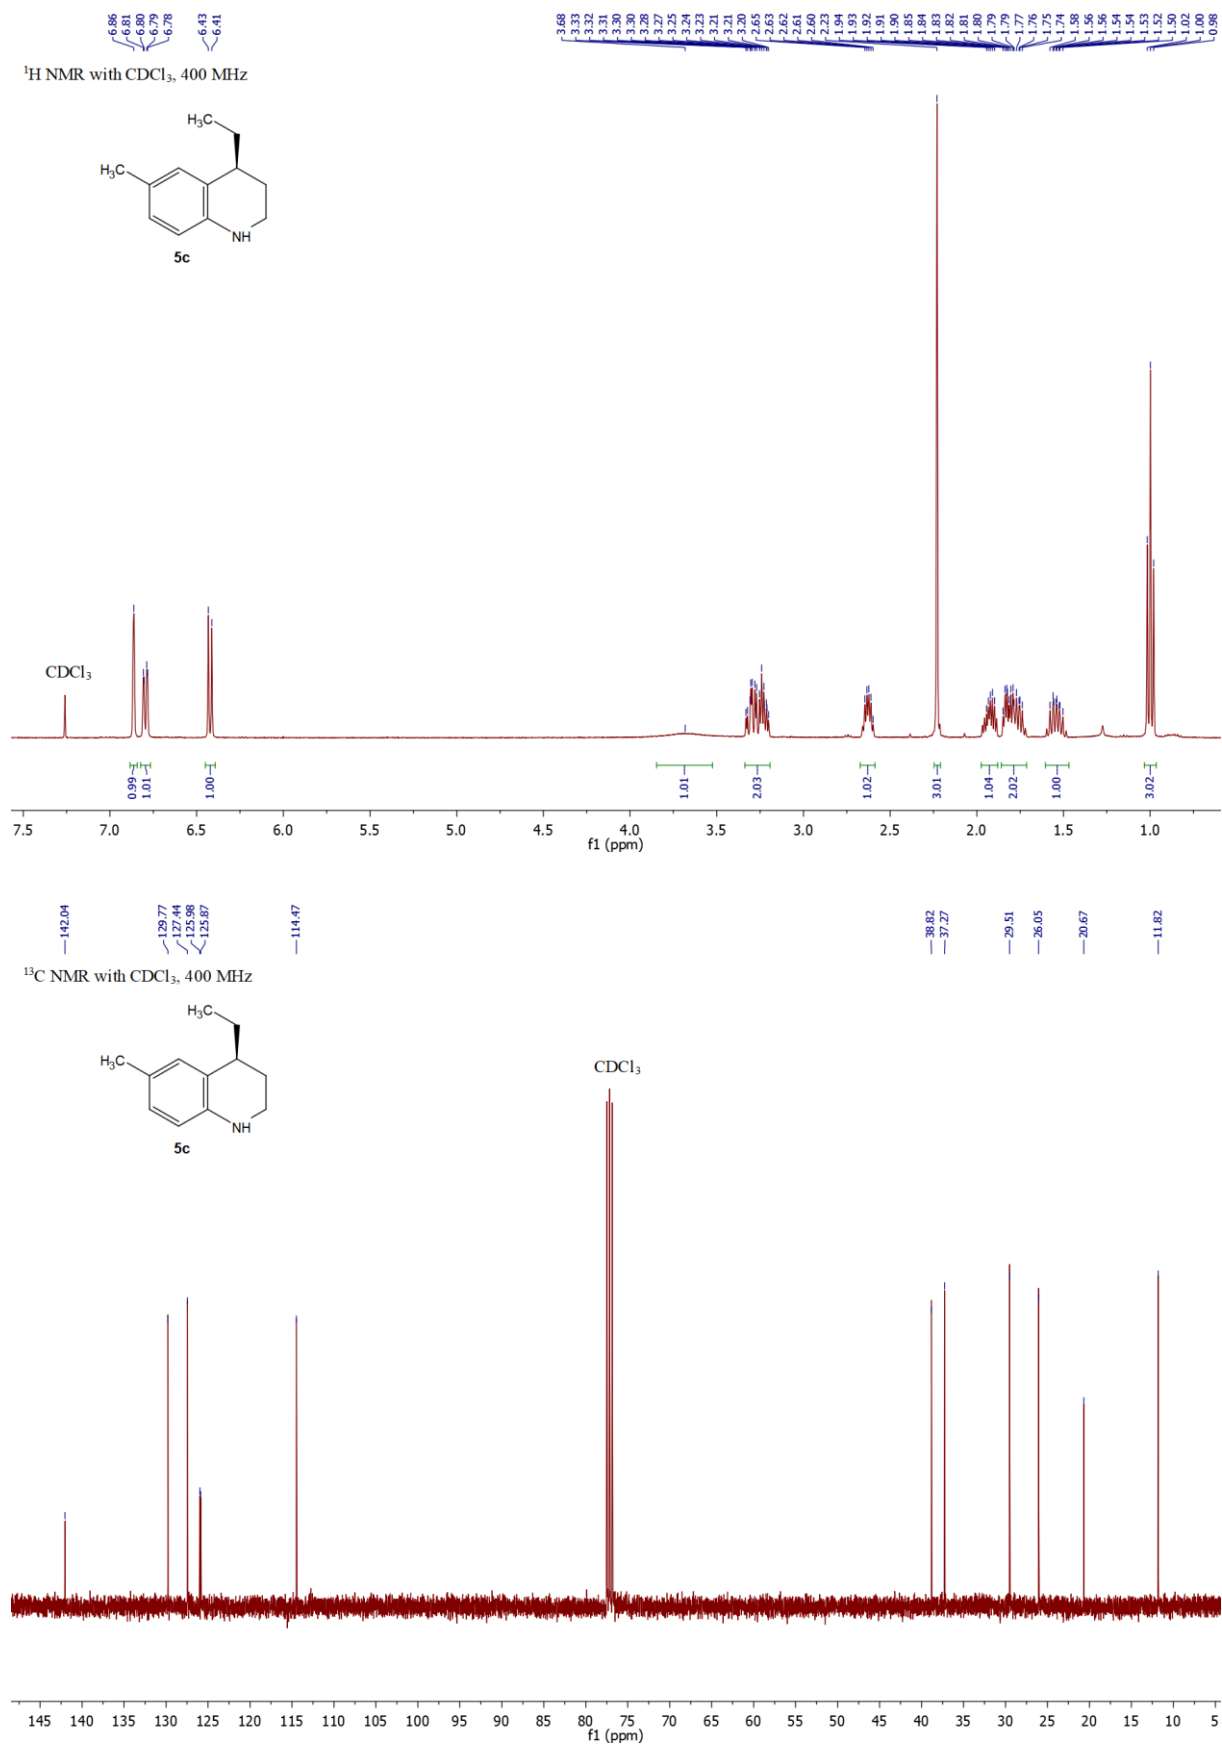

**Figure S48.** NMR spectra of (*S*)-4-Ethyl-6-methyl-1,2,3,4-tetrahydroquinoline (**5c**)

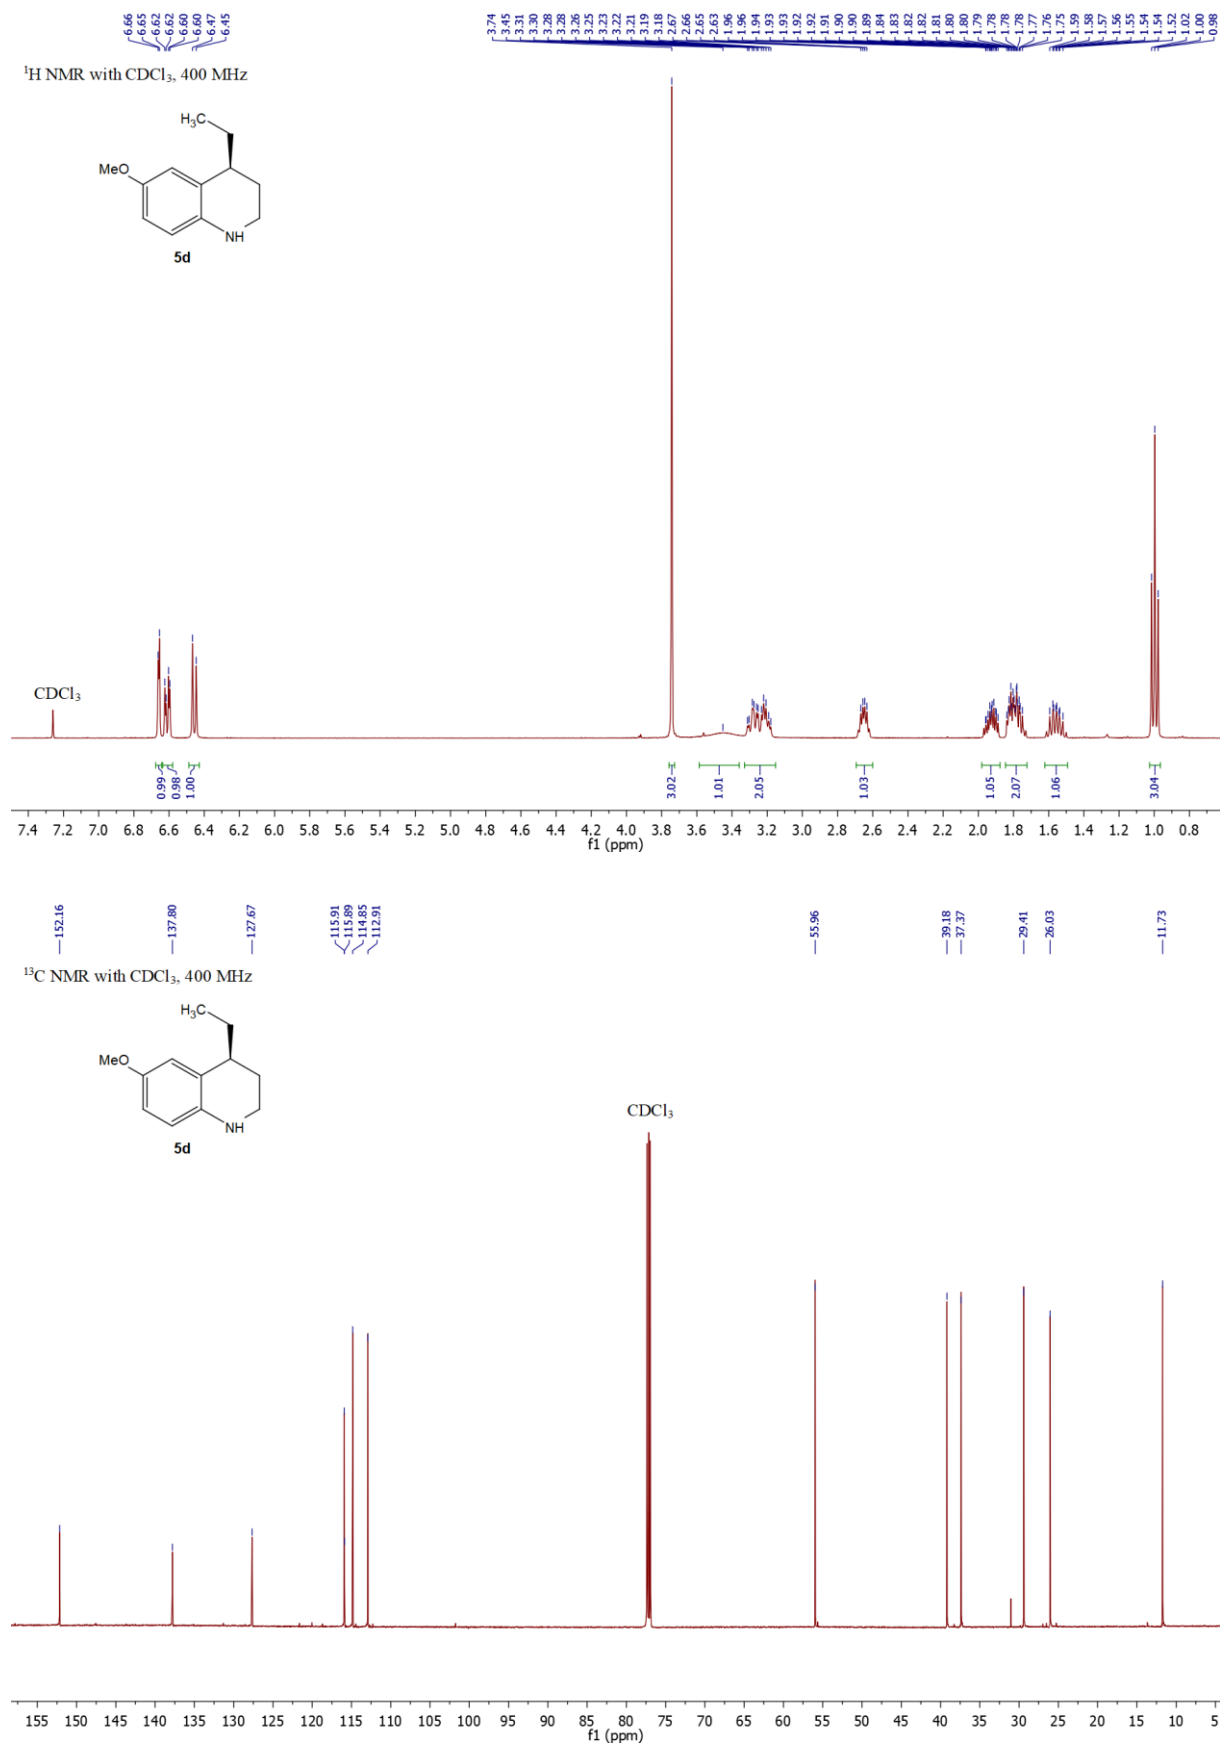

**Figure S49.** NMR spectra of (*S*)-4-Ethyl-6-methoxy-1,2,3,4-tetrahydroquinoline (**5d**)

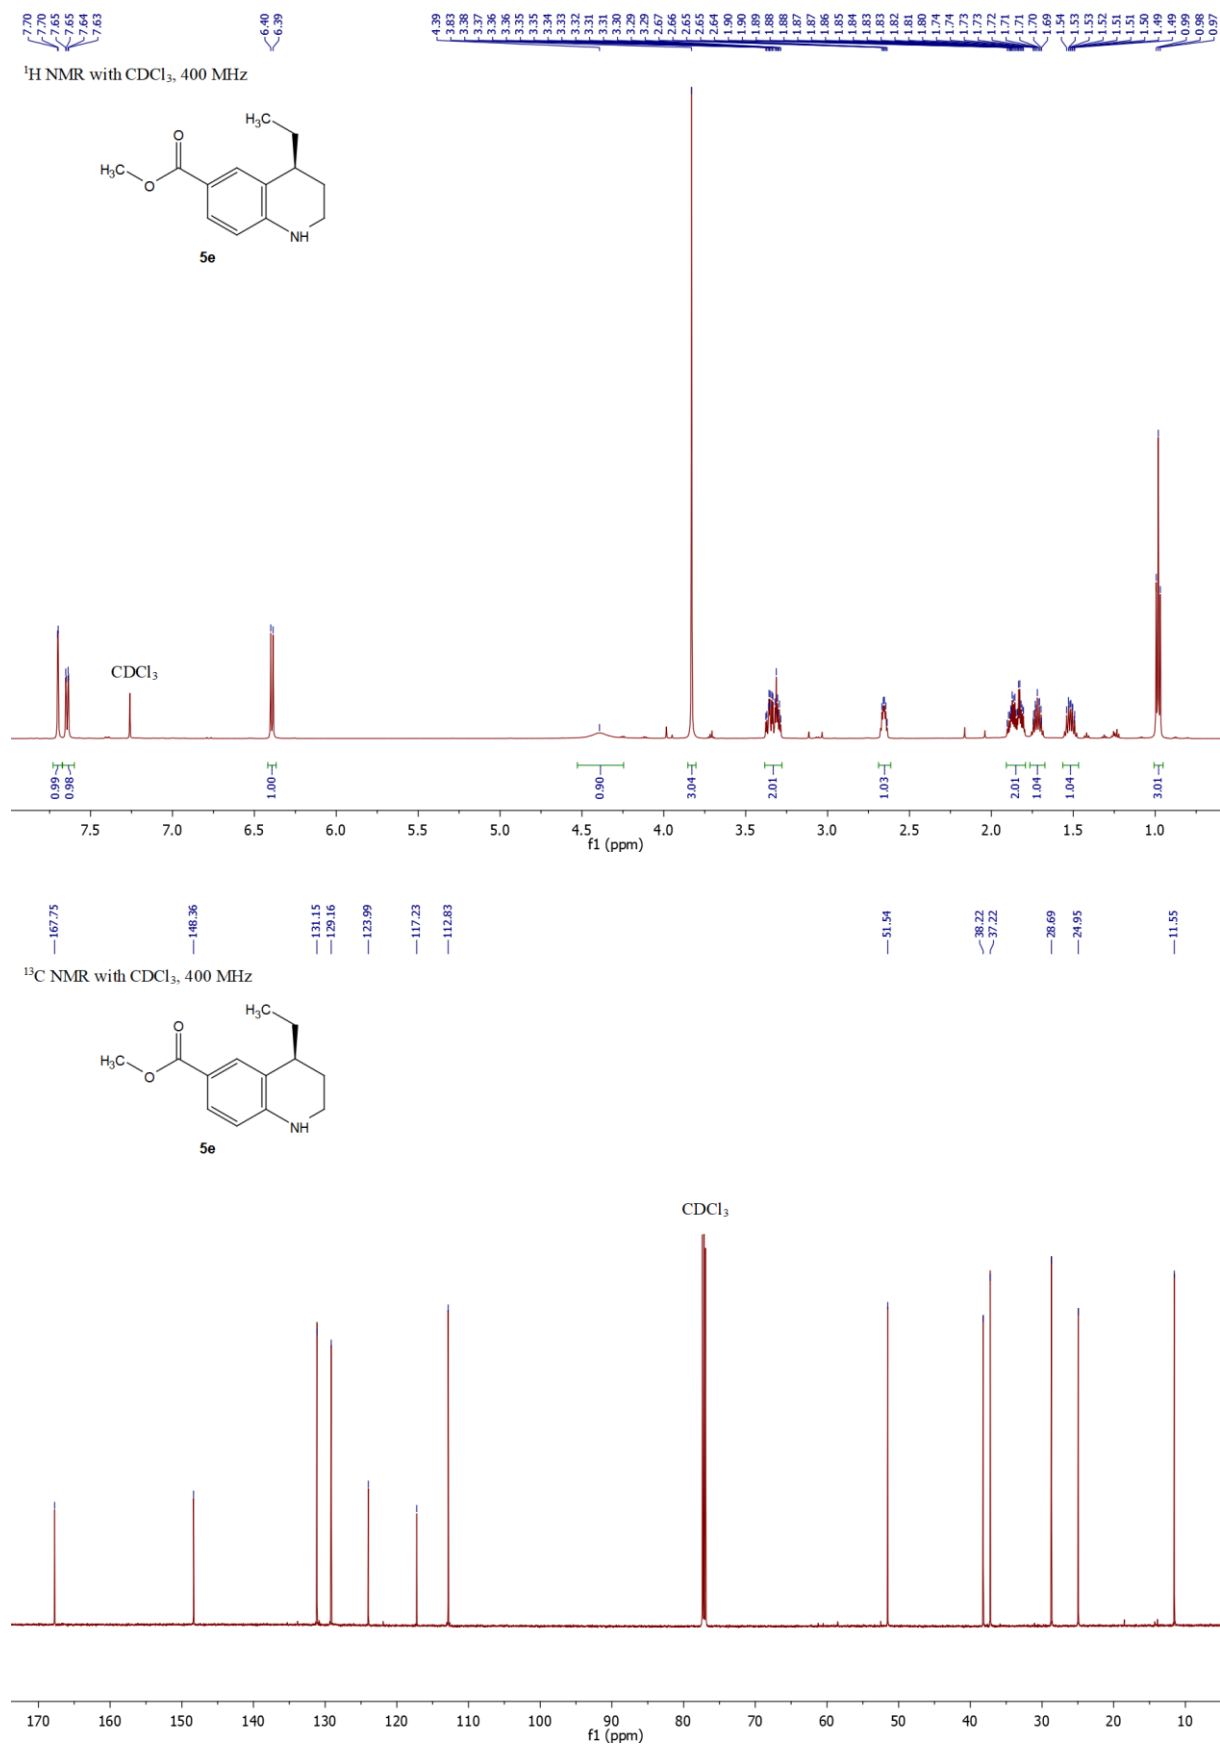

**Figure S50.** NMR spectra of (*S*)-Methyl 4-ethyl-1,2,3,4-tetrahydroquinoline-6-carboxylate (**5e**)

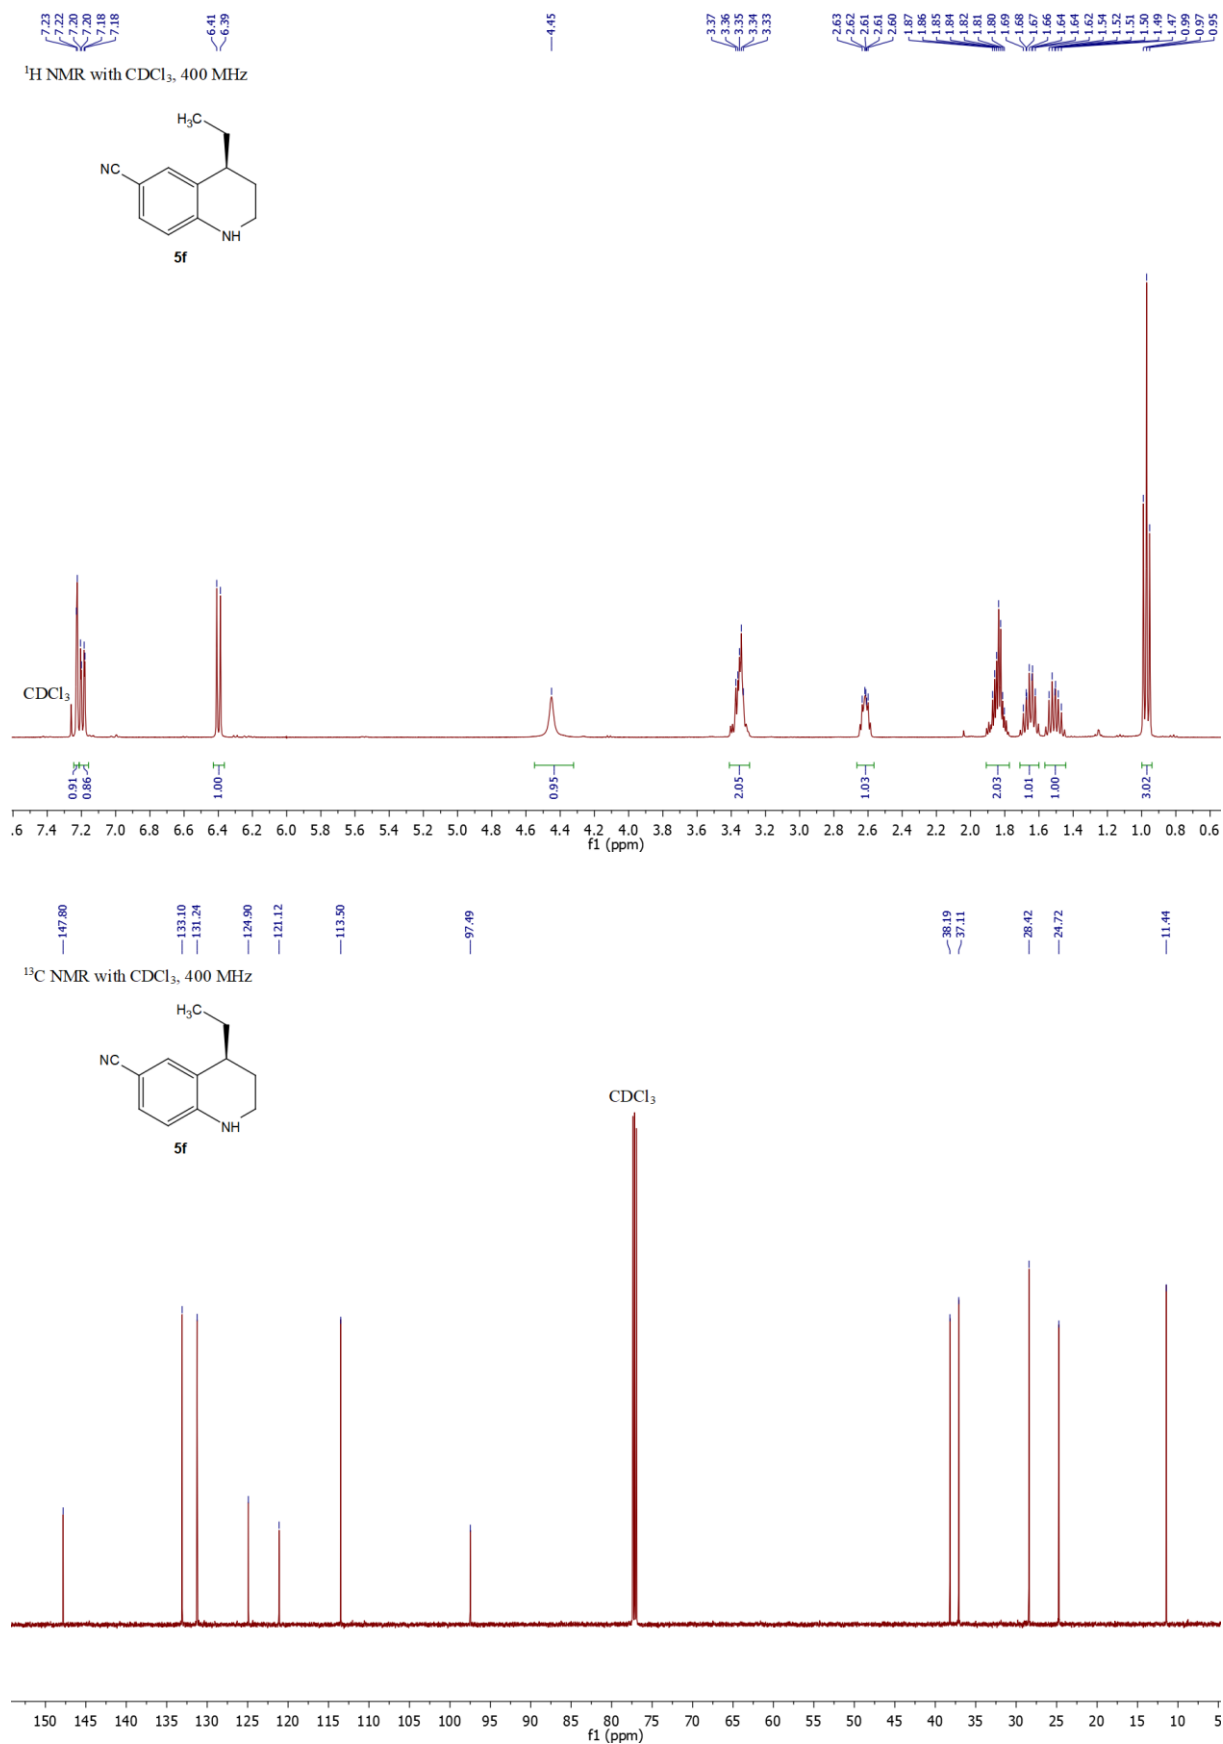

**Figure S51.** NMR spectra of (*S*)-6-Cyano-4-ethyl-1,2,3,4-tetrahydroquinoline (**5f**)

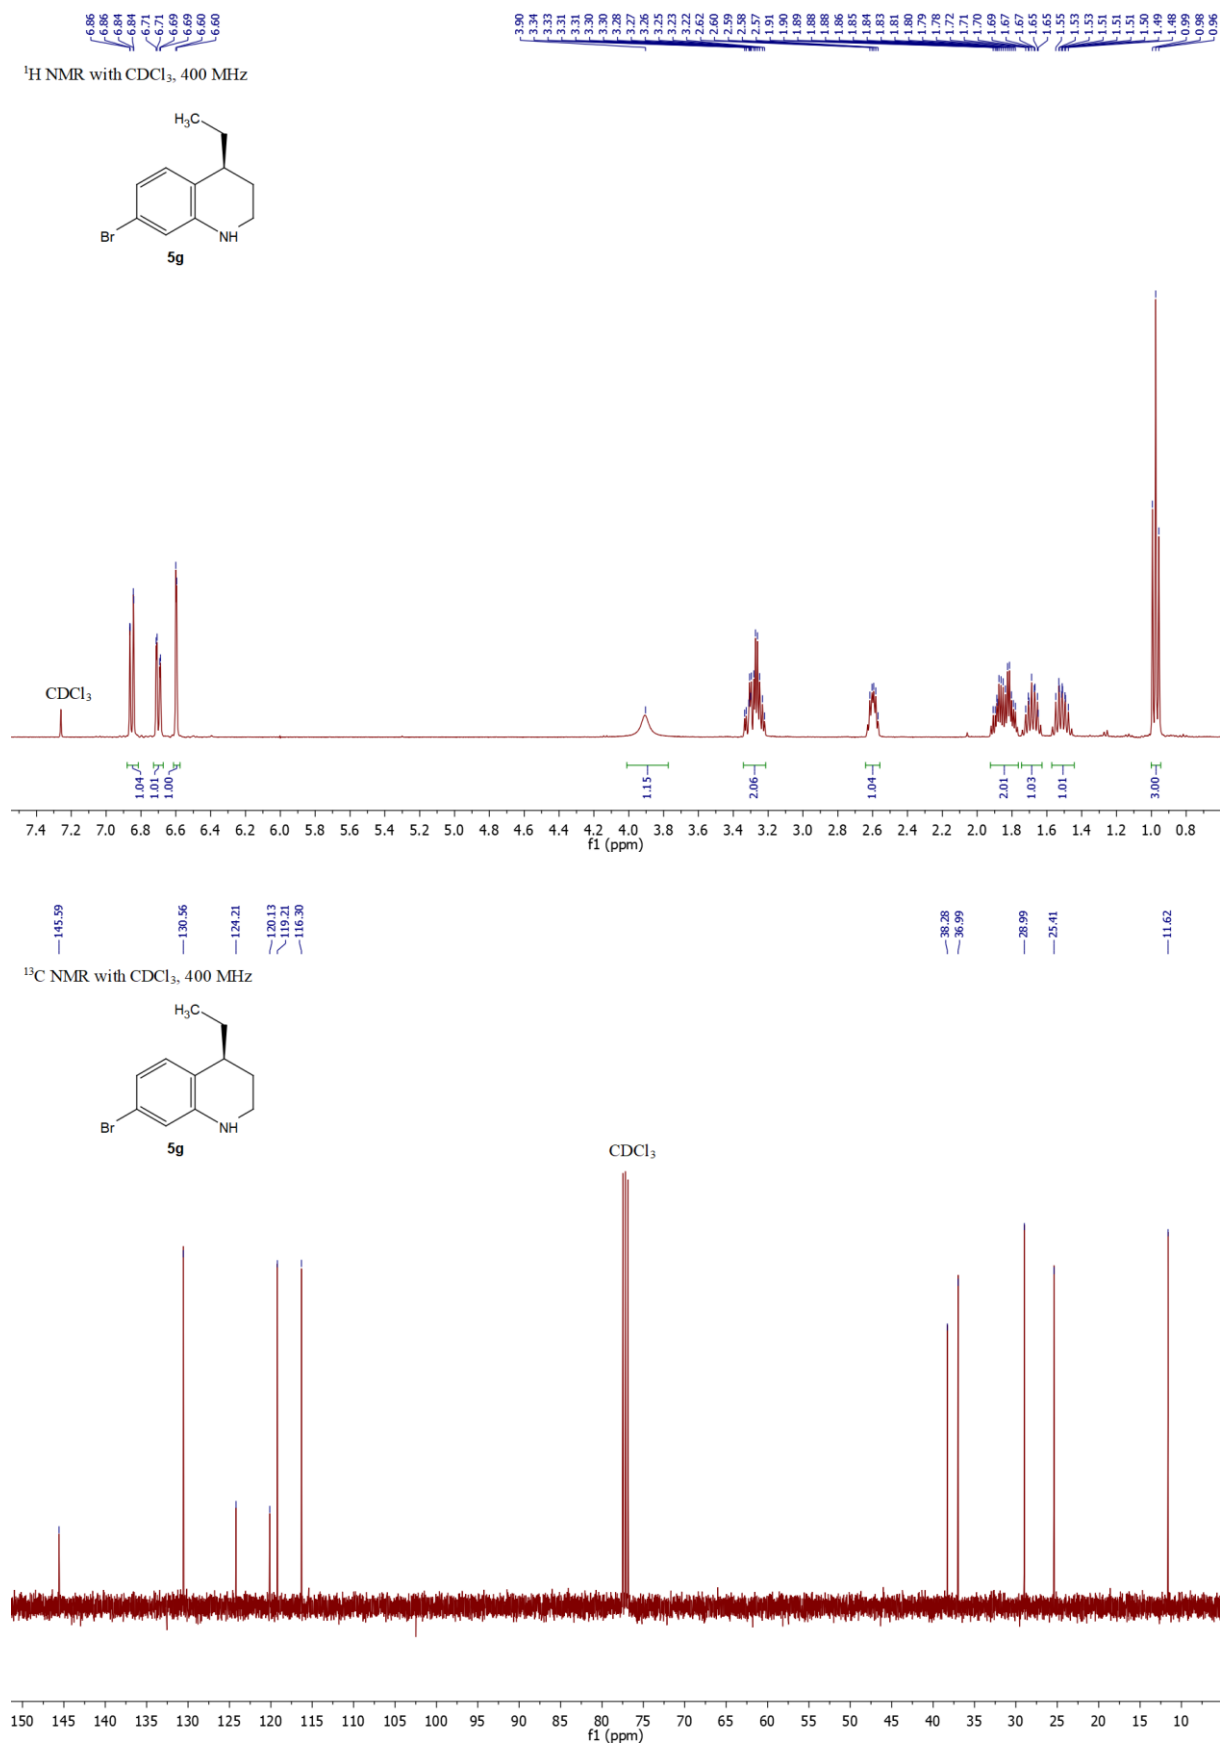

**Figure S52.** NMR spectra of *(S)*-7-Bromo-4-ethyl-1,2,3,4-tetrahydroquinoline (**5g**)

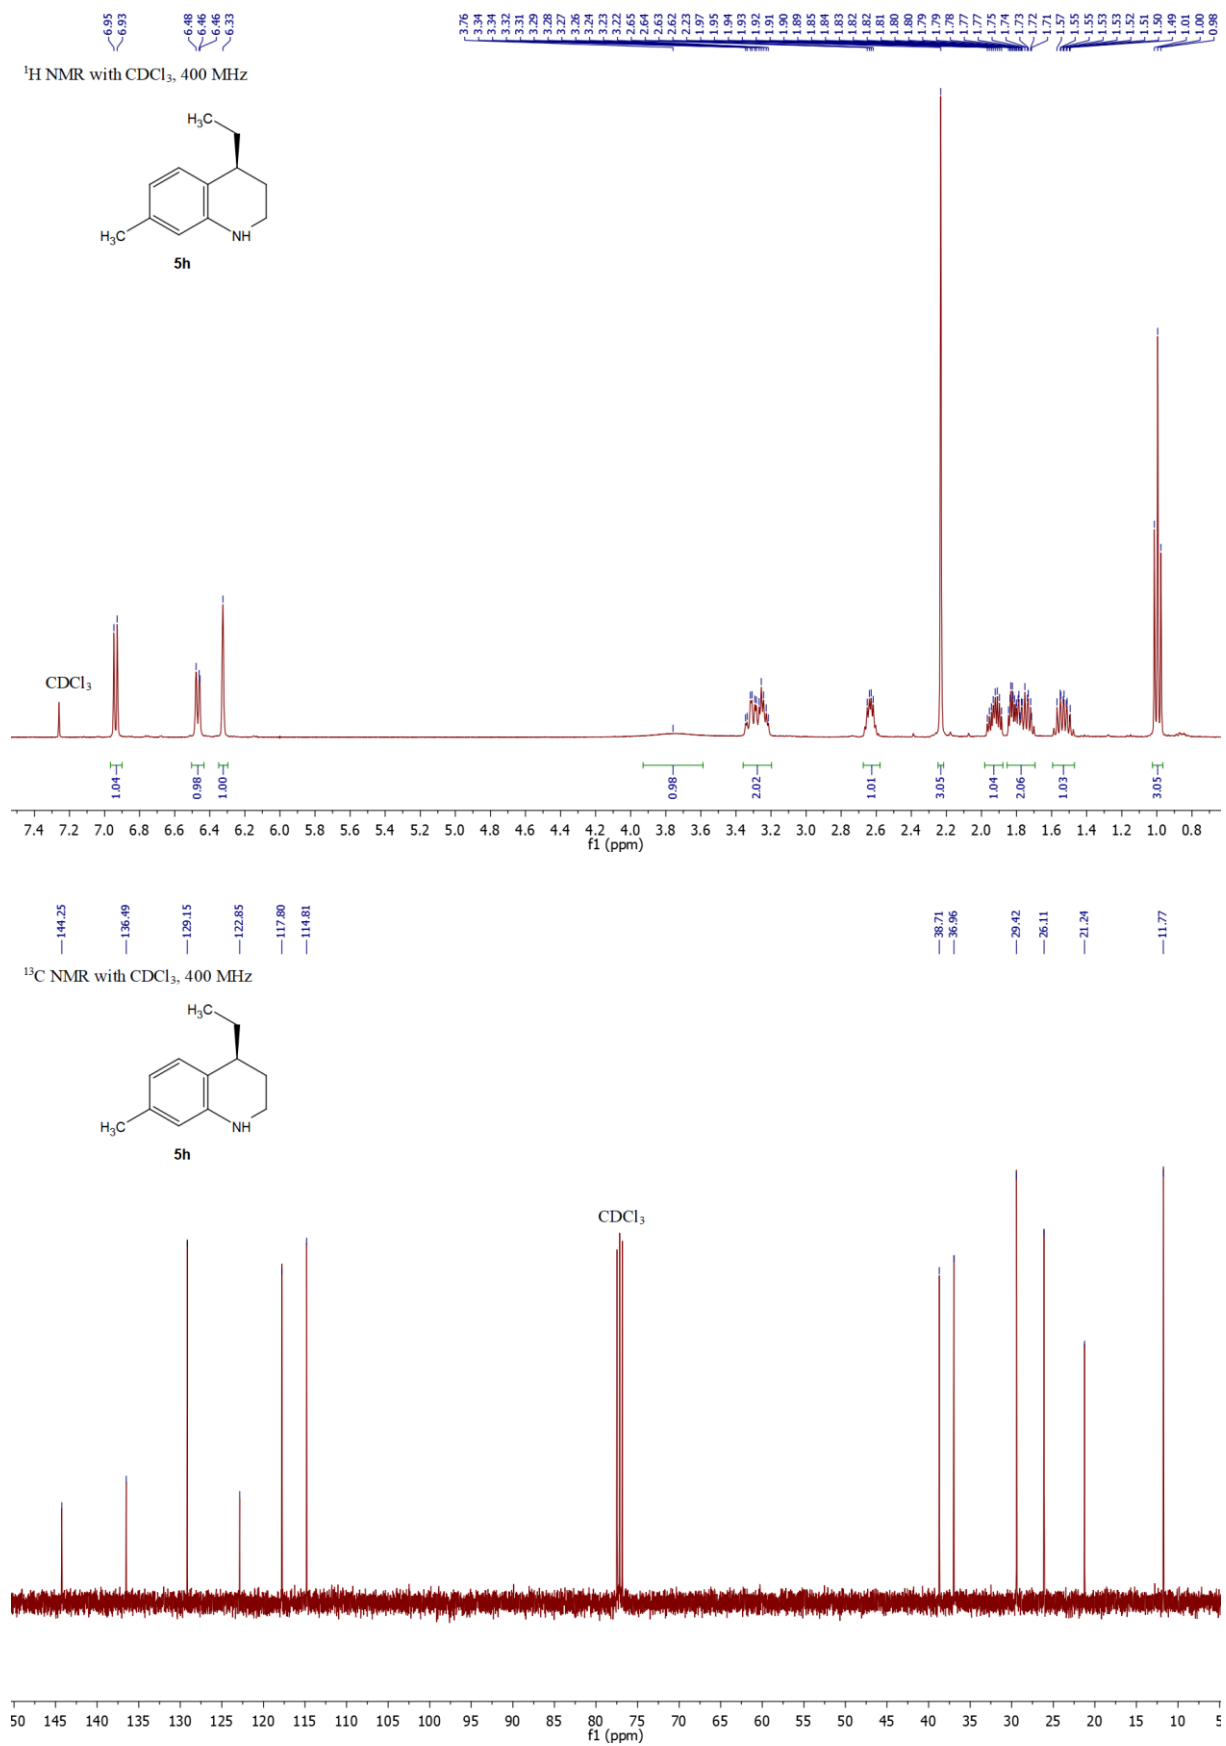

**Figure S53.** NMR spectra of (*S*)-4-Ethyl-7-methyl-1,2,3,4-tetrahydroquinoline (**5h**)









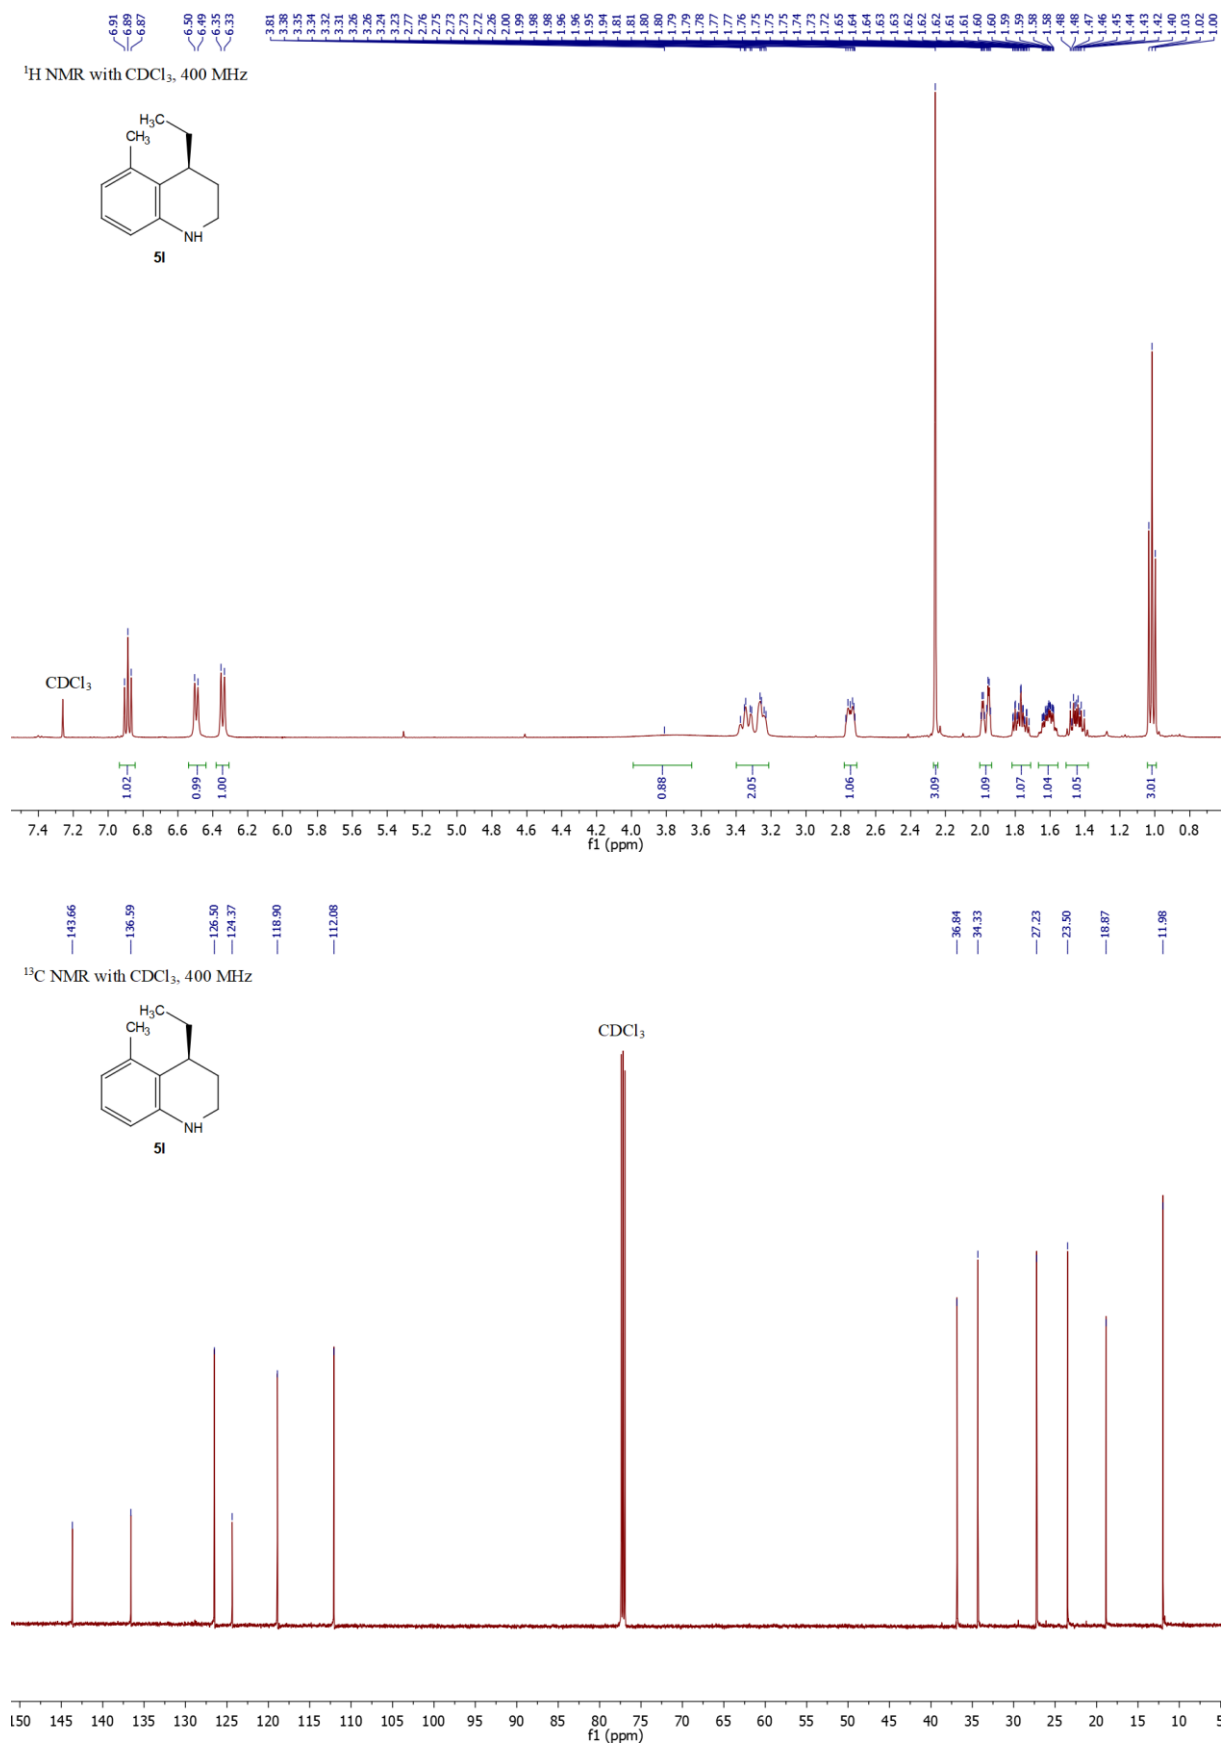

**Figure S57.** NMR spectra of (*S*)-4-Ethyl-5-methyl-1,2,3,4-tetrahydroquinoline (**51**)

<sup>1</sup>H NMR with CDCl<sub>3</sub>, 400 MHz

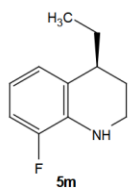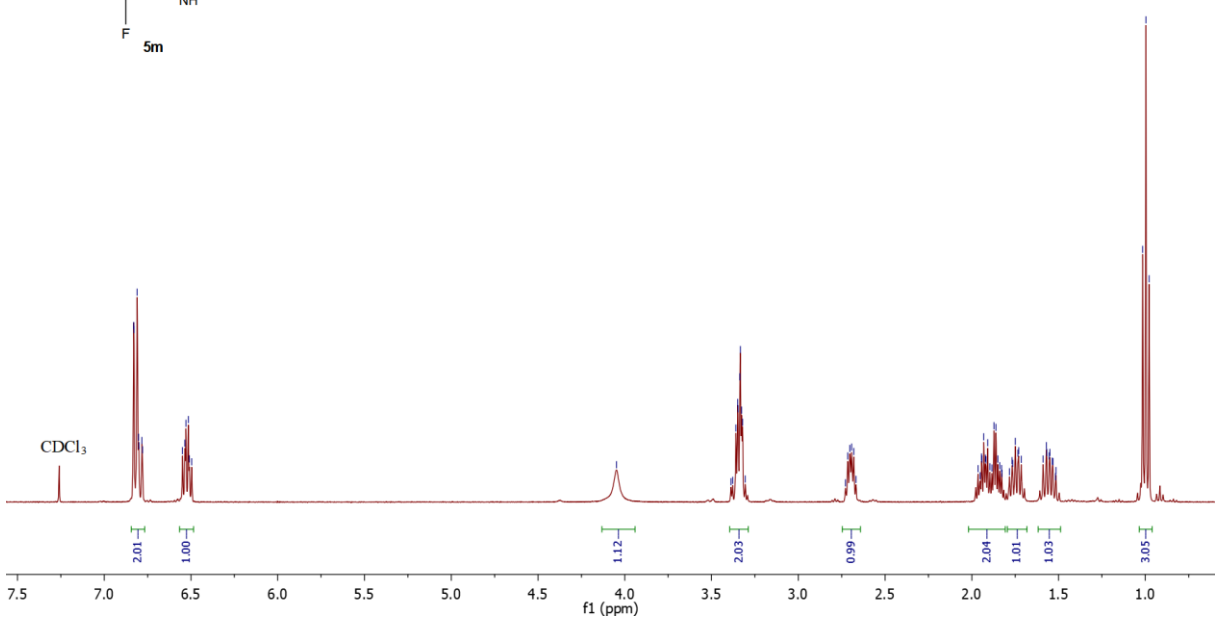

<sup>13</sup>C NMR with CDCl<sub>3</sub>, 400 MHz

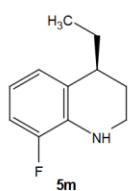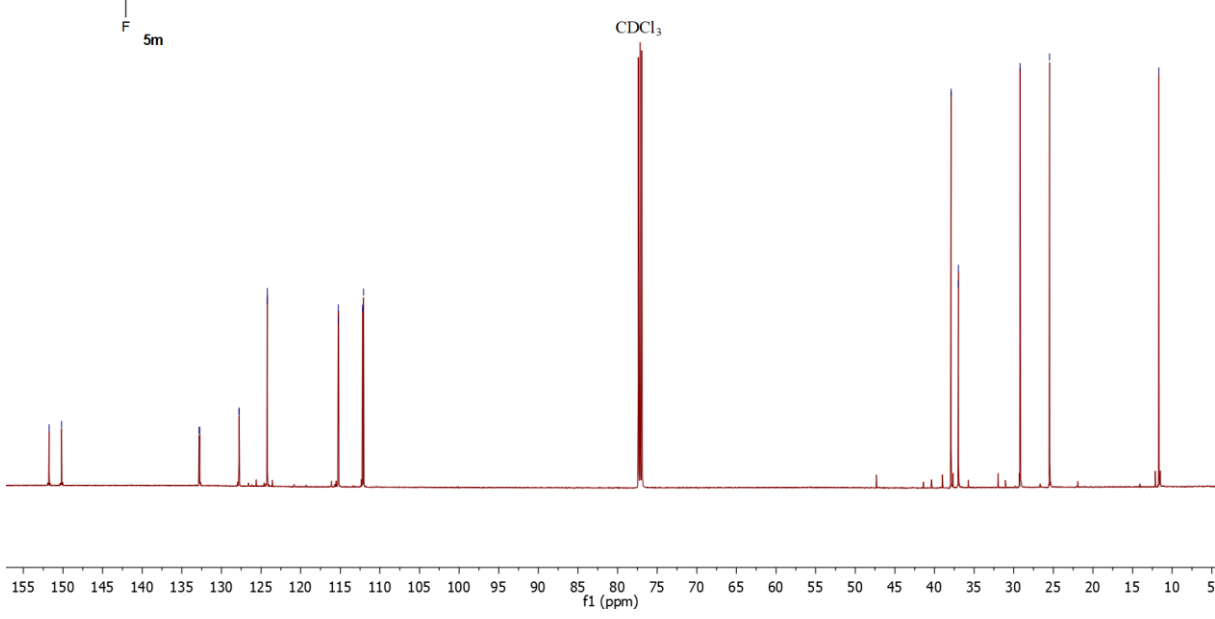

$^{19}\text{F}$  NMR with  $\text{CDCl}_3$ , 400 MHz

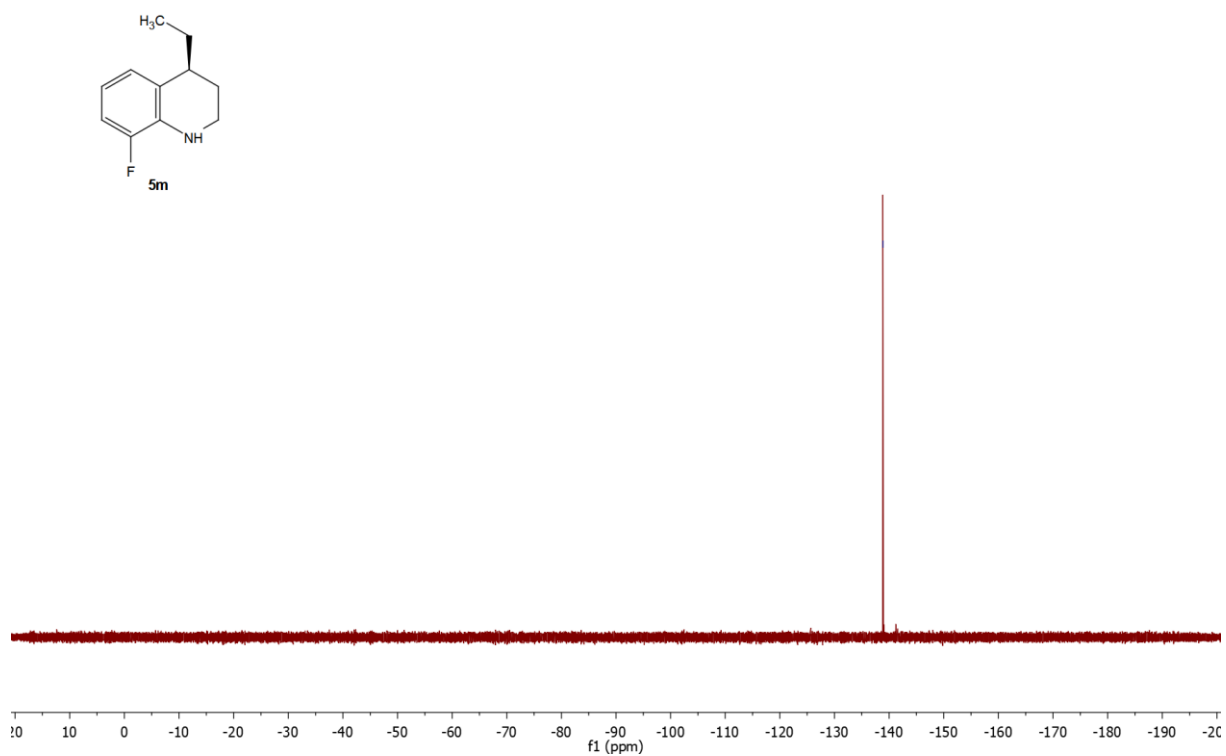

**Figure S58.** NMR spectra of (*S*)-4-Ethyl-8-fluoro-1,2,3,4-tetrahydroquinoline (**5m**)

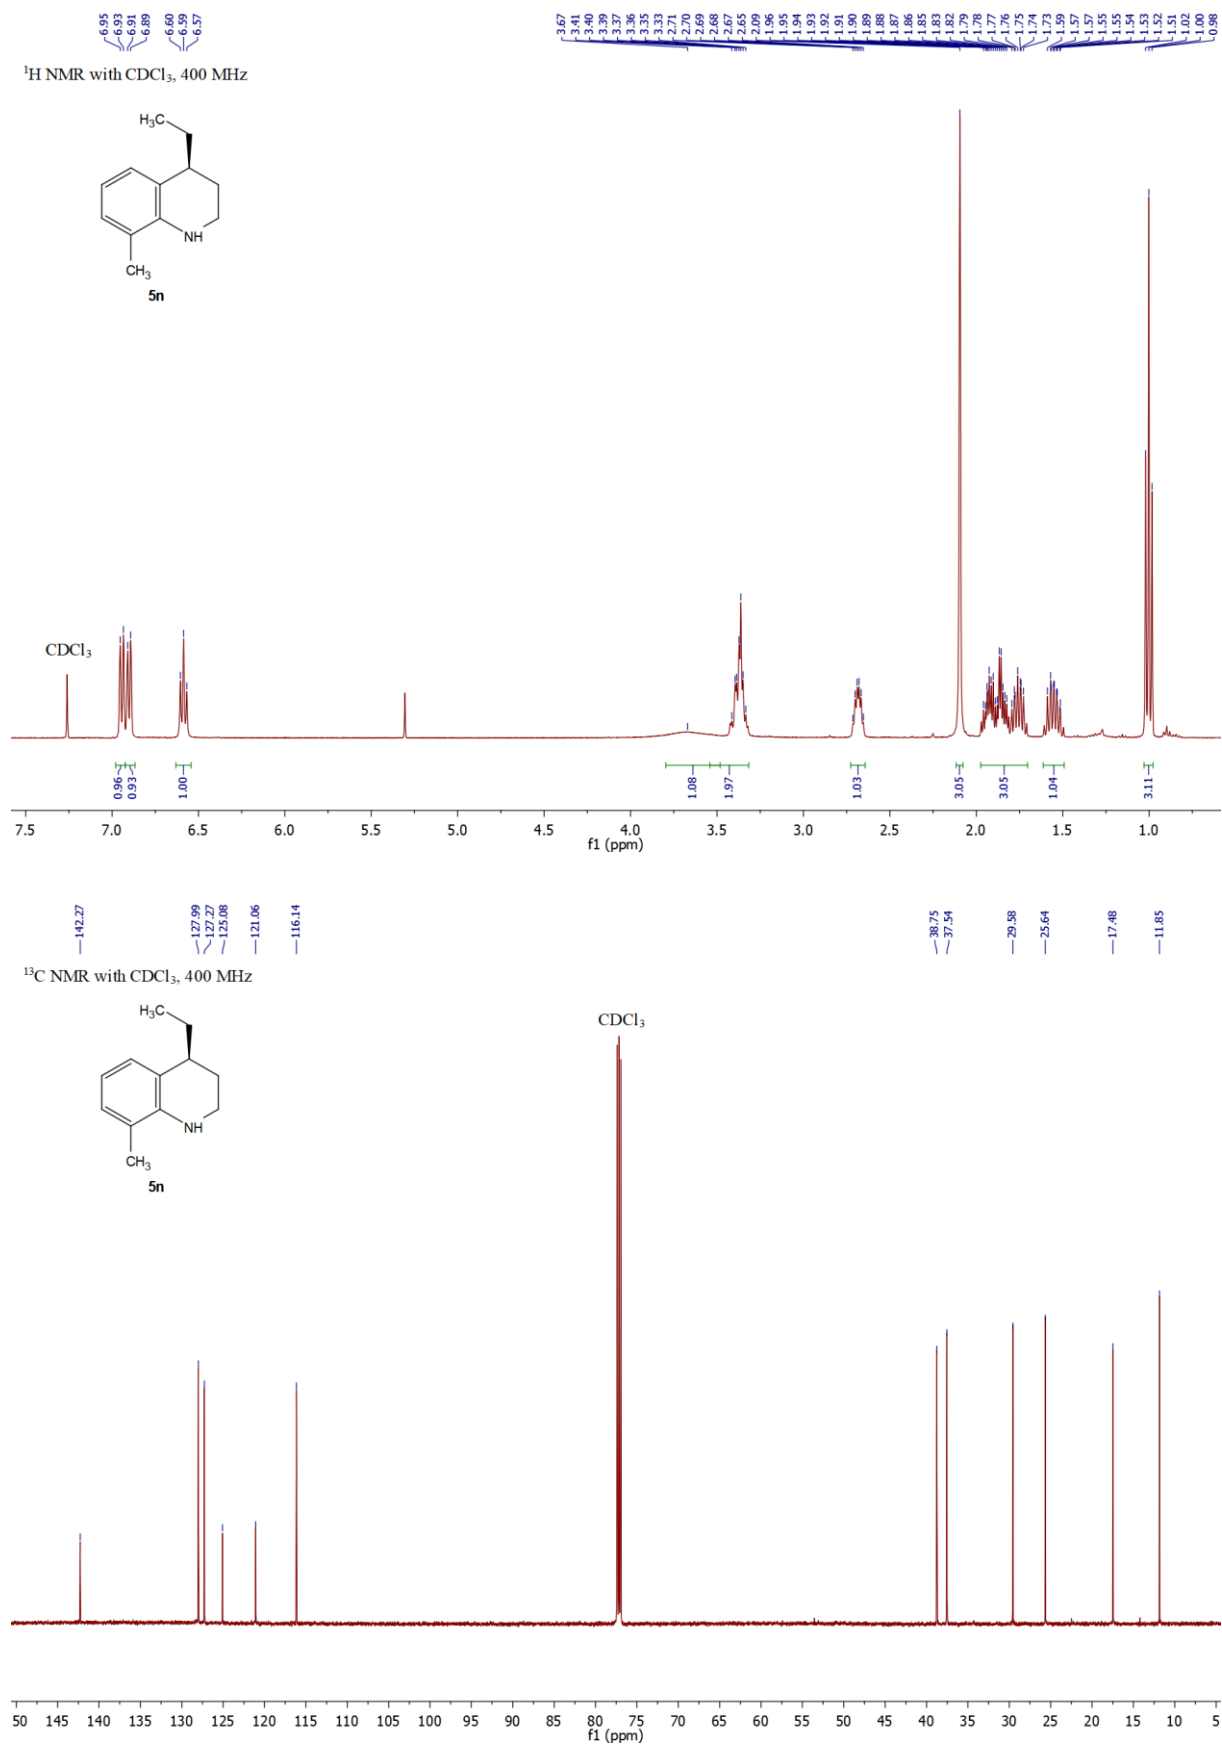

**Figure S59.** NMR spectra of (*S*)-4-Ethyl-8-methyl-1,2,3,4-tetrahydroquinoline (**5n**)

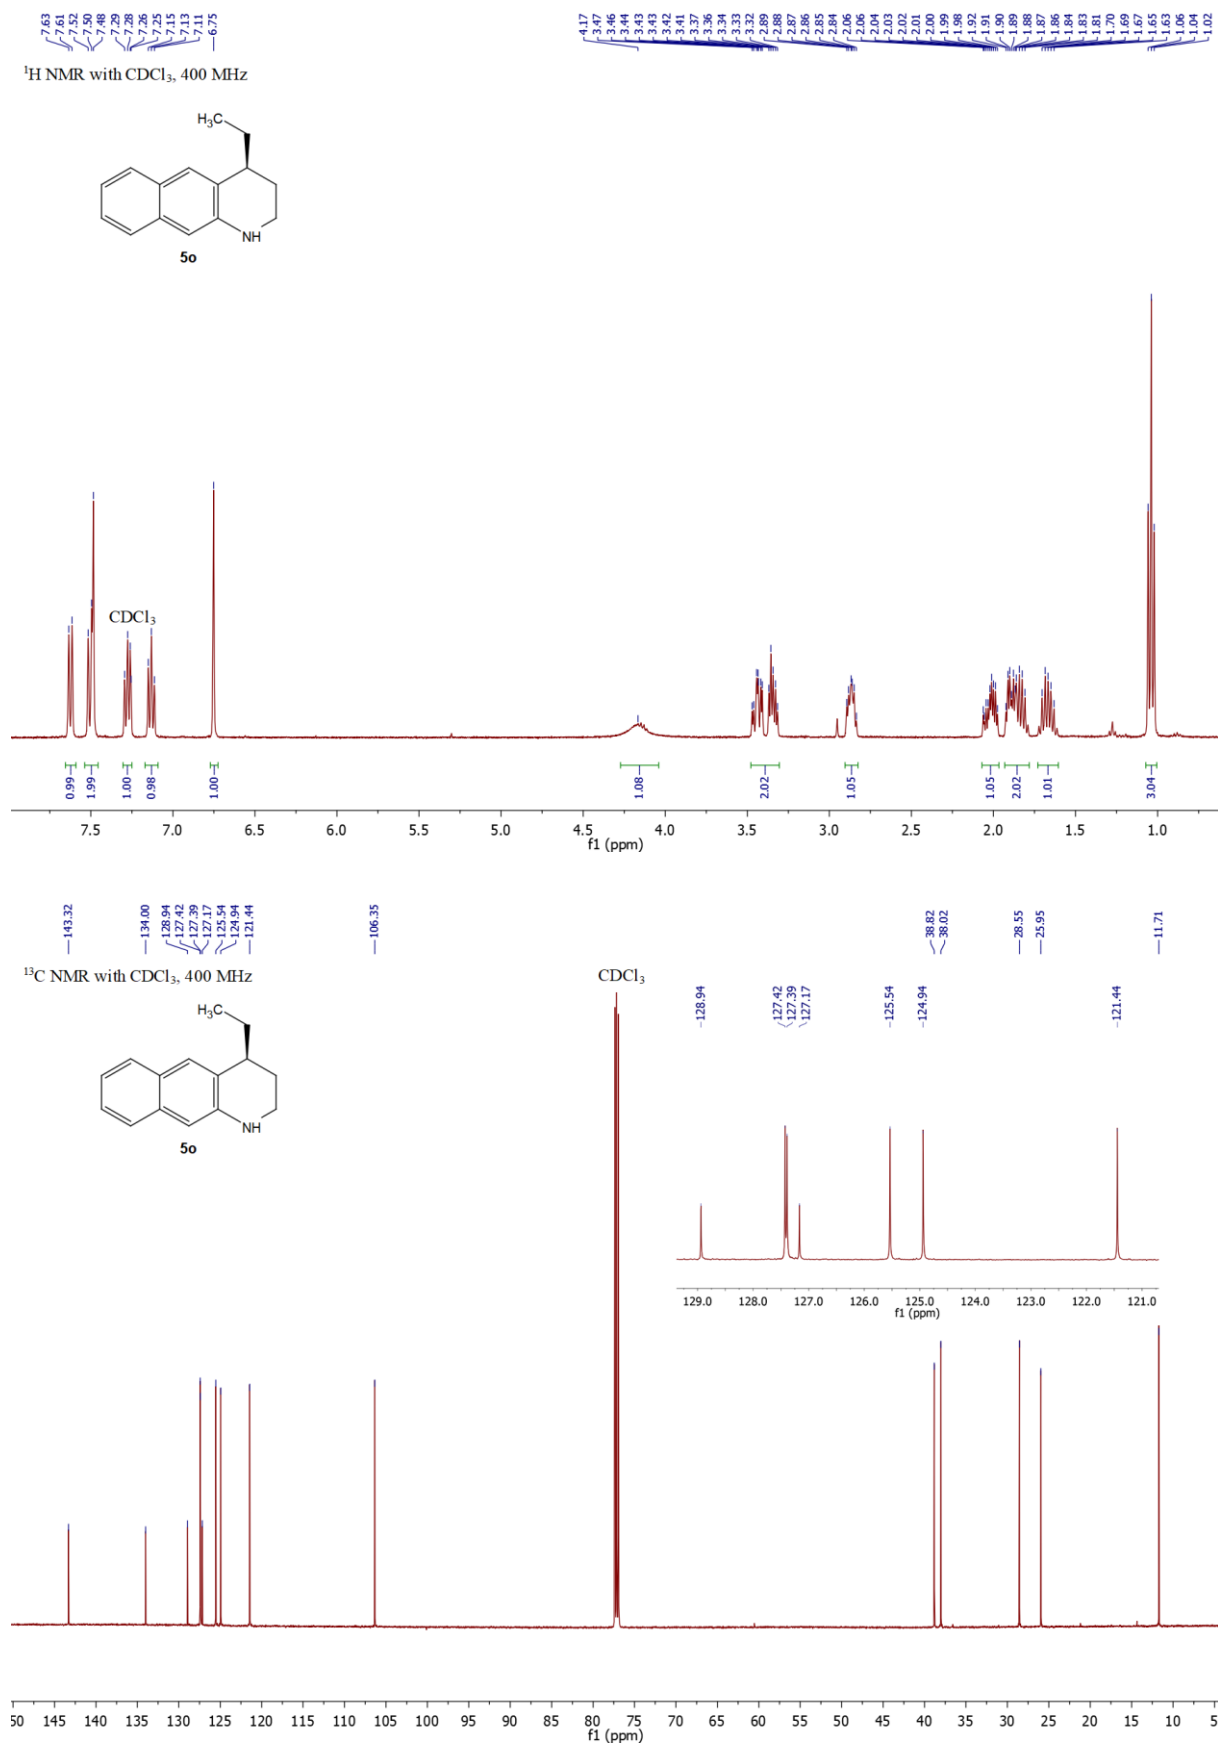

**Figure S60.** NMR spectra of (*S*)-4-Ethyl-1,2,3,4-tetrahydrobenzo[*g*]quinoline (**5o**)

7.17  
7.15  
7.15  
7.03  
7.00  
7.00  
6.98  
6.96  
6.70  
6.68  
6.66  
6.65  
6.65  
6.63  
6.61  
6.51  
6.50  
6.49  
3.67  
3.46  
3.46  
3.45  
3.44  
3.44  
3.43  
3.43  
3.42  
3.41  
3.41  
3.40  
3.39  
3.38  
2.91  
2.90  
2.90  
2.89  
2.88  
2.87  
2.86  
2.85  
2.84  
2.84  
2.63  
2.61  
2.61  
2.59  
2.09  
2.07  
2.06  
2.05  
2.04  
2.04  
2.03  
2.03  
2.01  
2.01  
2.00  
2.00  
1.99  
1.88  
1.87  
1.84  
1.84  
1.69  
1.67  
1.67  
1.63  
1.61  
1.60  
1.59  
1.57  
1.56  
1.56  
1.54  
1.52  
1.52  
1.39  
1.39  
1.33  
1.30  
1.28  
1.23  
1.22  
1.03  
1.01  
0.98  
0.97  
0.96

<sup>1</sup>H NMR with CDCl<sub>3</sub>, 400 MHz

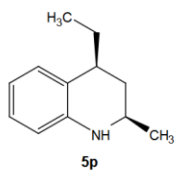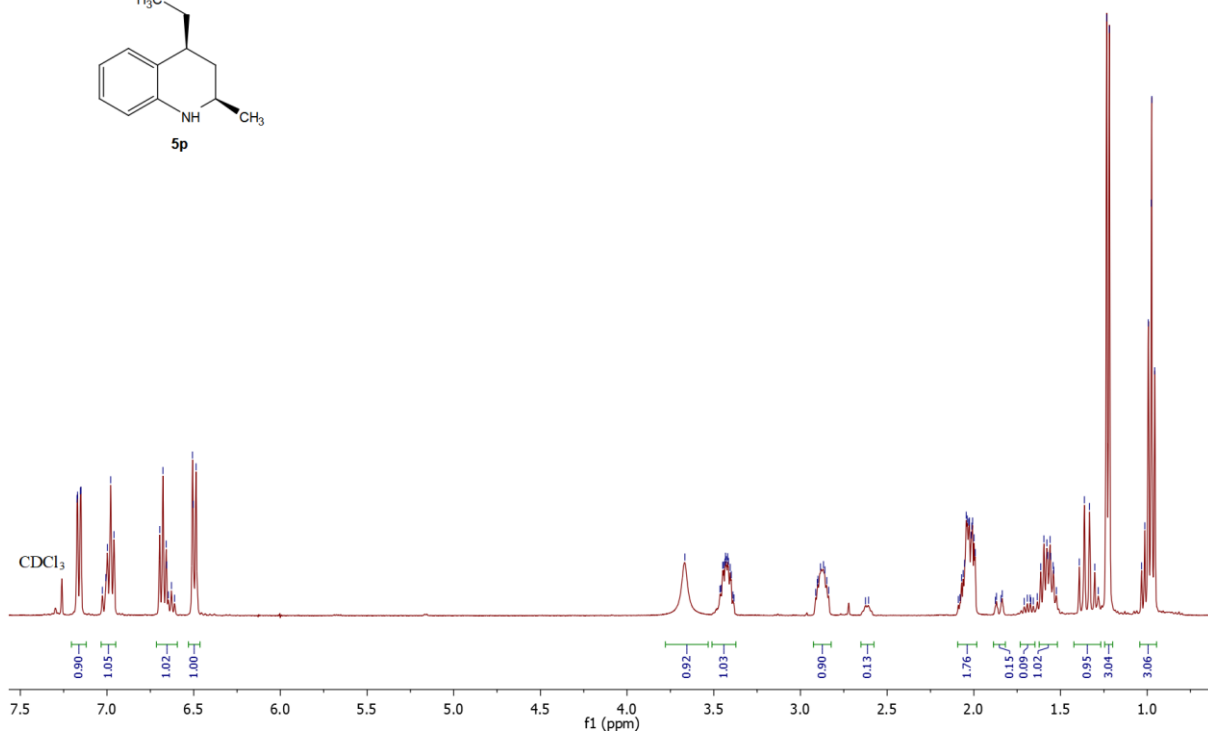

145.60  
144.16  
129.73  
127.13  
126.87  
126.66  
125.40  
125.24  
117.51  
116.64  
114.40  
113.94

<sup>13</sup>C NMR with CDCl<sub>3</sub>, 400 MHz

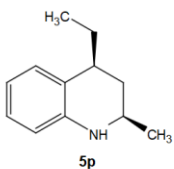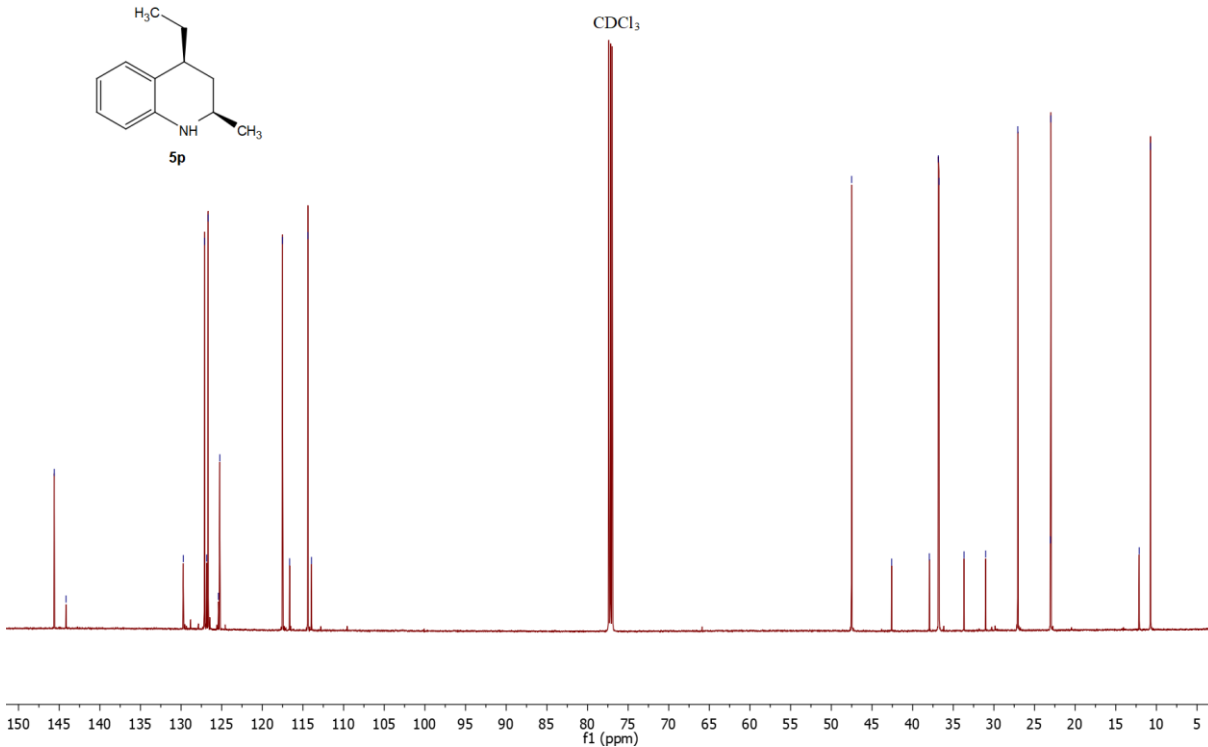



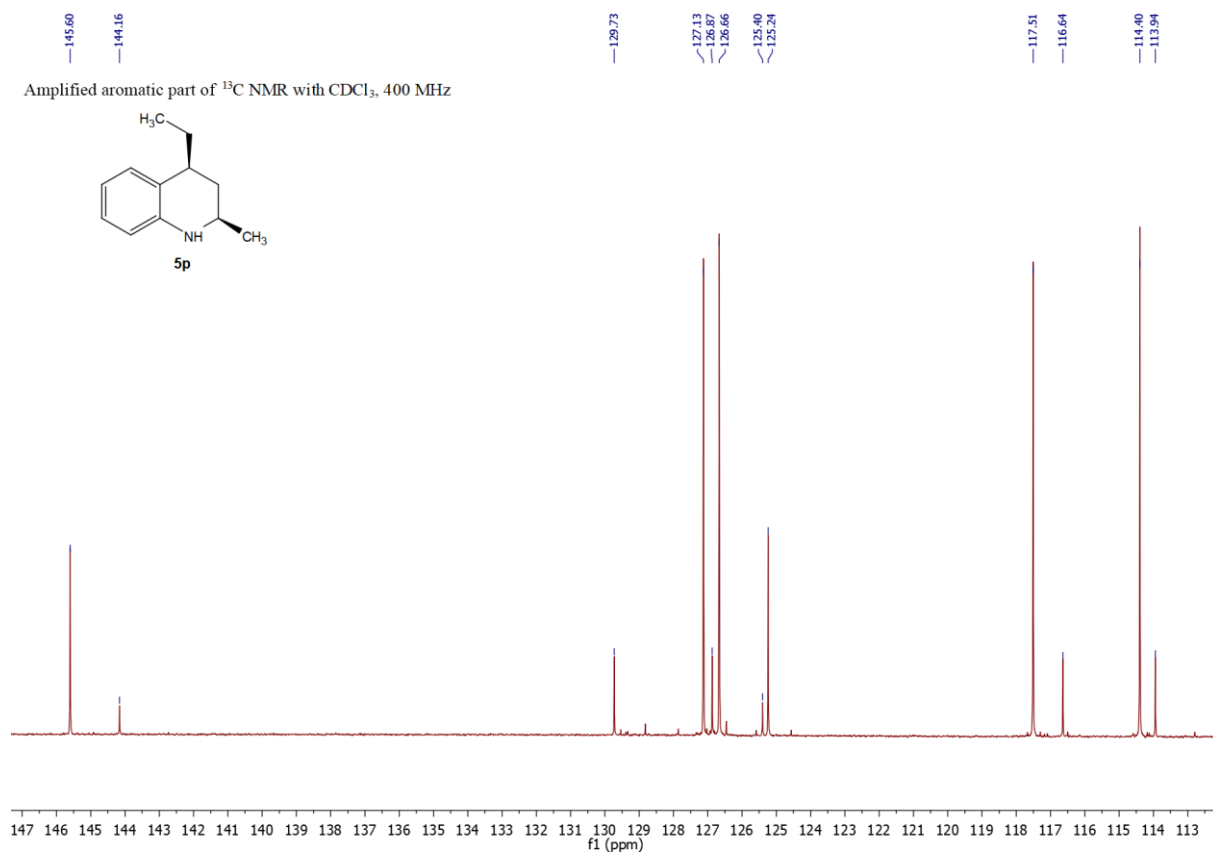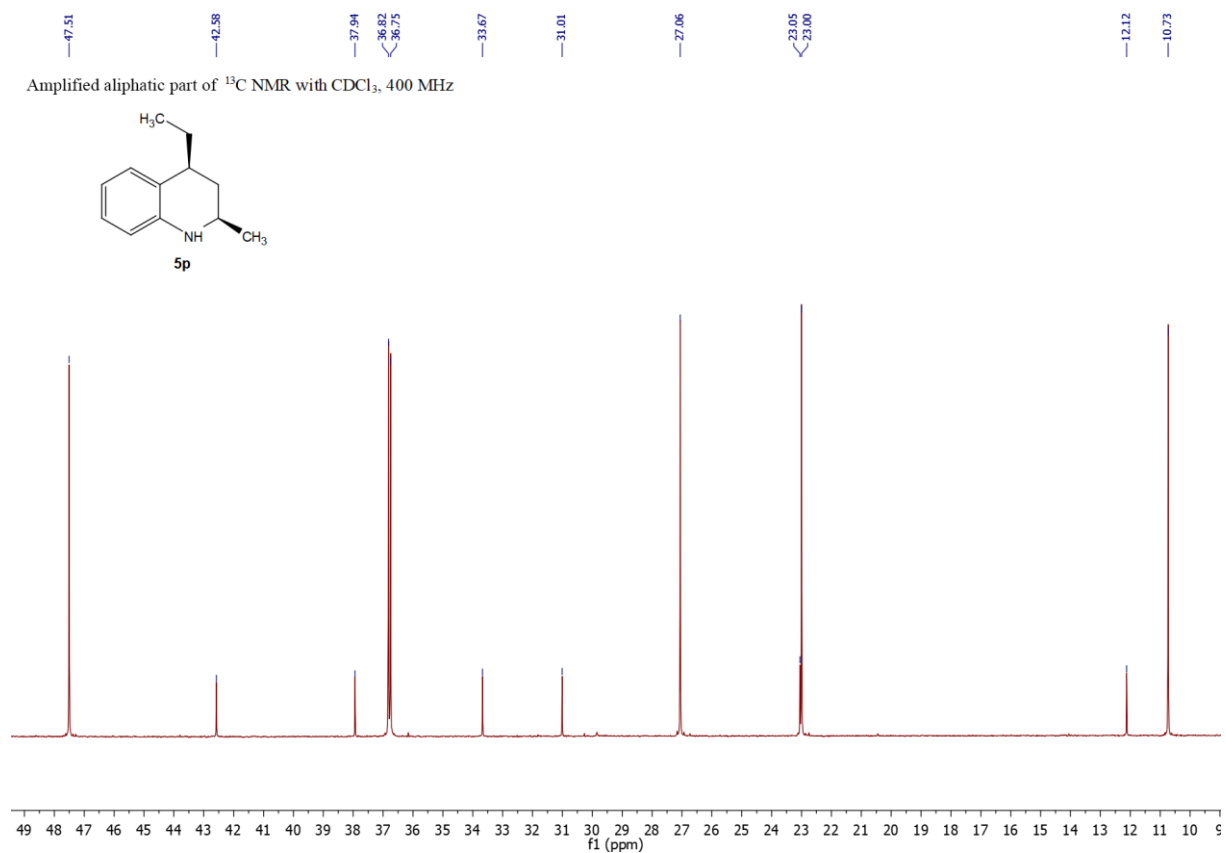

**Figure S61.** NMR spectra of (2*R*,4*S*)-4-Ethyl-2-methyl-1,2,3,4-tetrahydroquinoline (**5p**)

7.48  
7.47  
7.46  
7.45  
7.44  
7.42  
7.41  
7.40  
7.39  
7.38  
7.37  
7.35  
7.34  
7.33  
7.32  
7.31  
7.24  
7.23  
7.22  
7.21  
7.06  
7.05  
7.03  
7.02  
7.01  
6.76  
6.74  
6.72  
6.57  
6.55  
6.55  
6.46  
4.43  
3.97  
3.06  
3.04  
3.04  
2.23  
2.22  
2.21  
2.20  
2.19  
2.19  
2.19  
2.12  
2.11  
2.10  
2.09  
2.08  
2.07  
1.86  
1.82  
1.77  
1.74  
1.71  
1.64  
1.62  
1.61  
1.60  
1.59  
1.58  
1.57  
1.08  
1.06  
1.00  
1.00  
1.00

<sup>1</sup>H NMR with CDCl<sub>3</sub>, 400 MHz

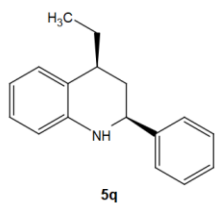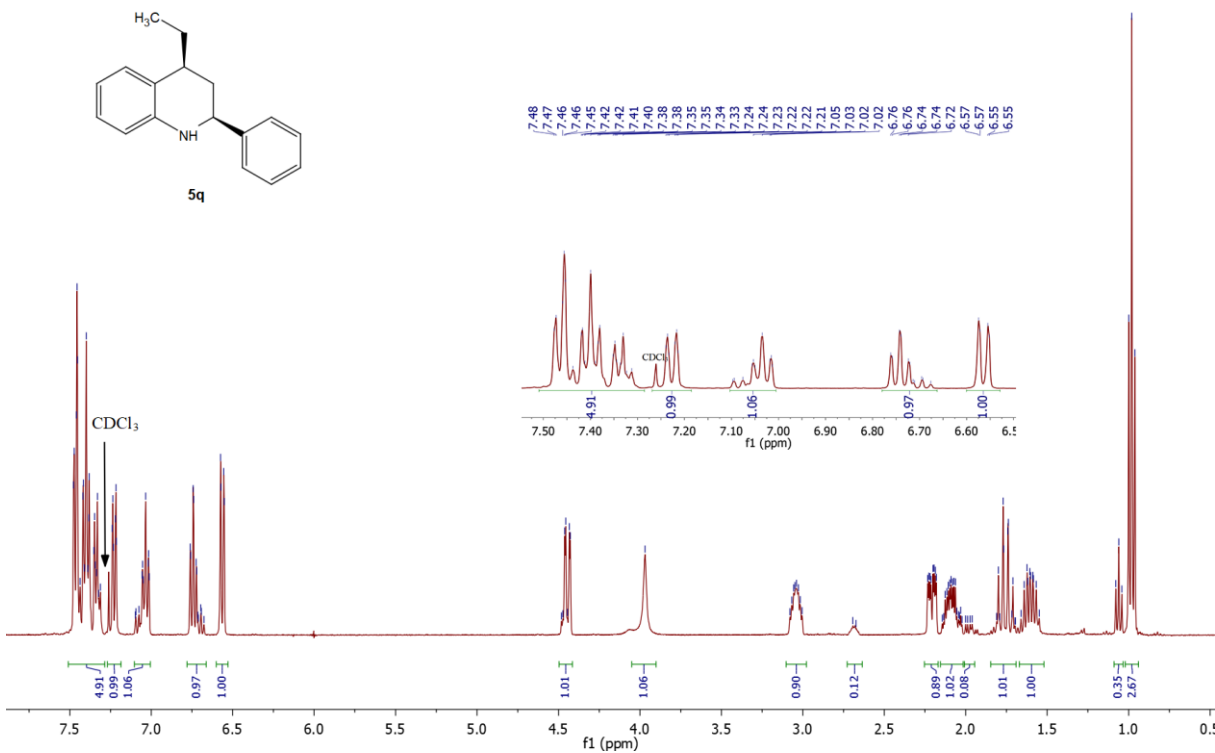

145.89  
145.01  
144.82  
144.12  
139.63  
128.77  
128.74  
127.73  
127.62  
127.07  
126.85  
126.78  
125.16  
125.05  
117.81  
116.95  
114.61  
114.10

57.15  
52.35

38.01  
37.93  
37.35  
34.89

30.67  
26.99

12.02  
10.80

<sup>13</sup>C NMR with CDCl<sub>3</sub>, 400 MHz

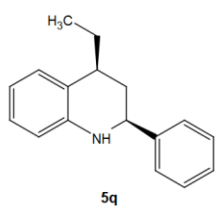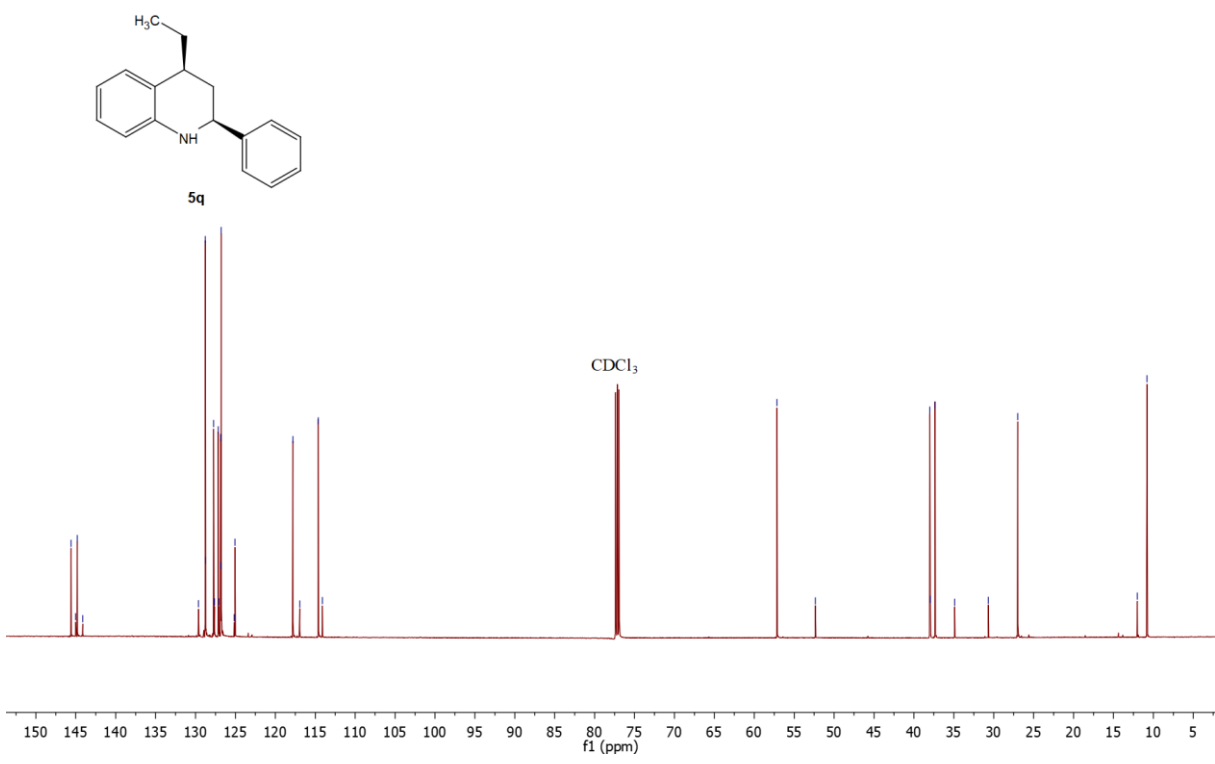

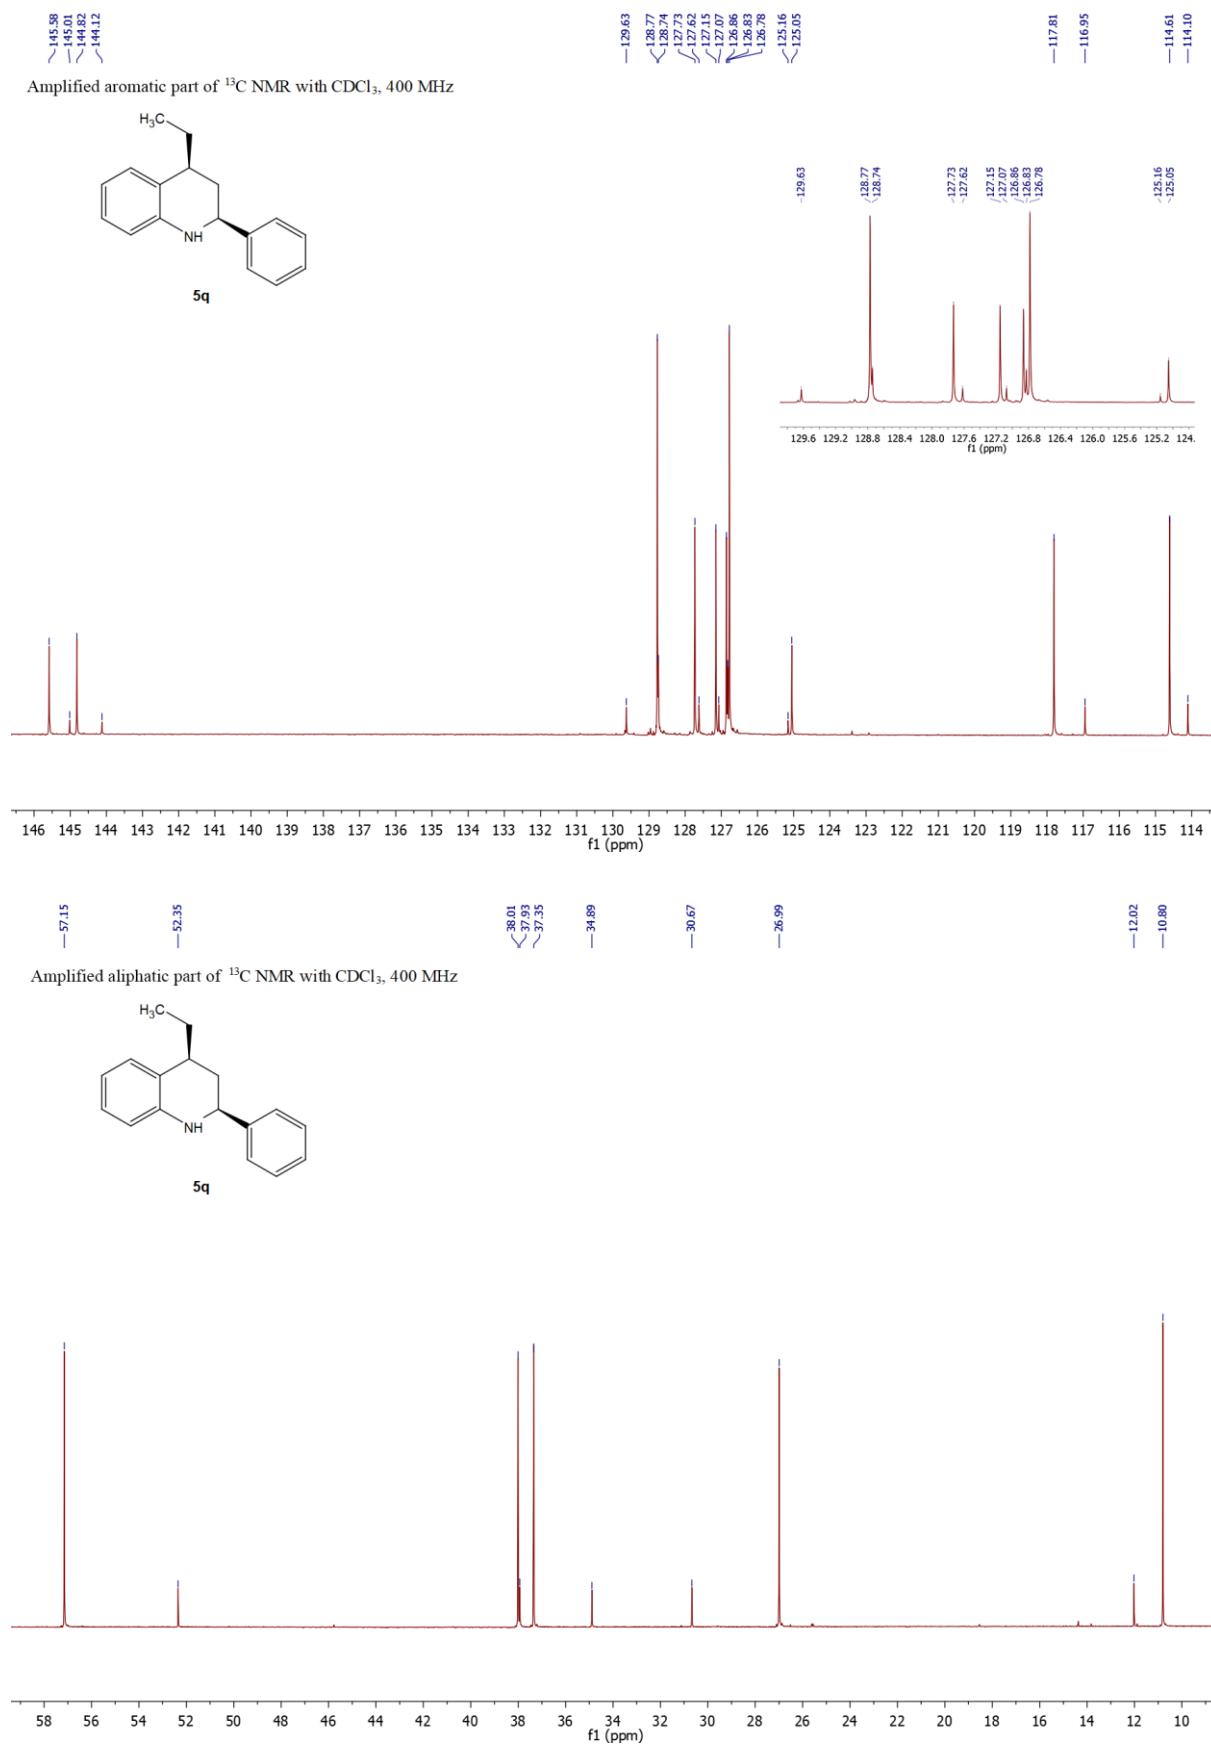

**Figure S62.** NMR spectra of (2*S*,4*S*)-4-ethyl-2-phenyl-1,2,3,4-tetrahydroquinoline (**5q**)

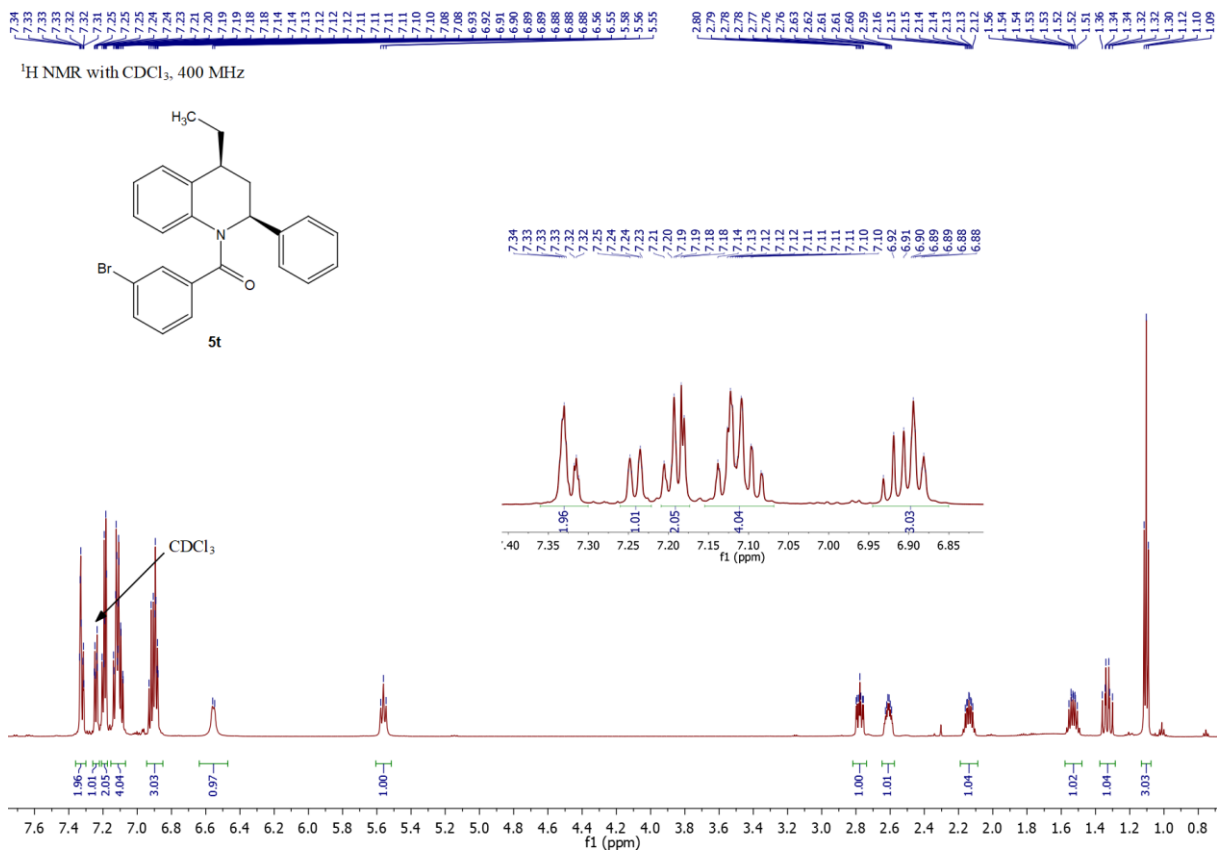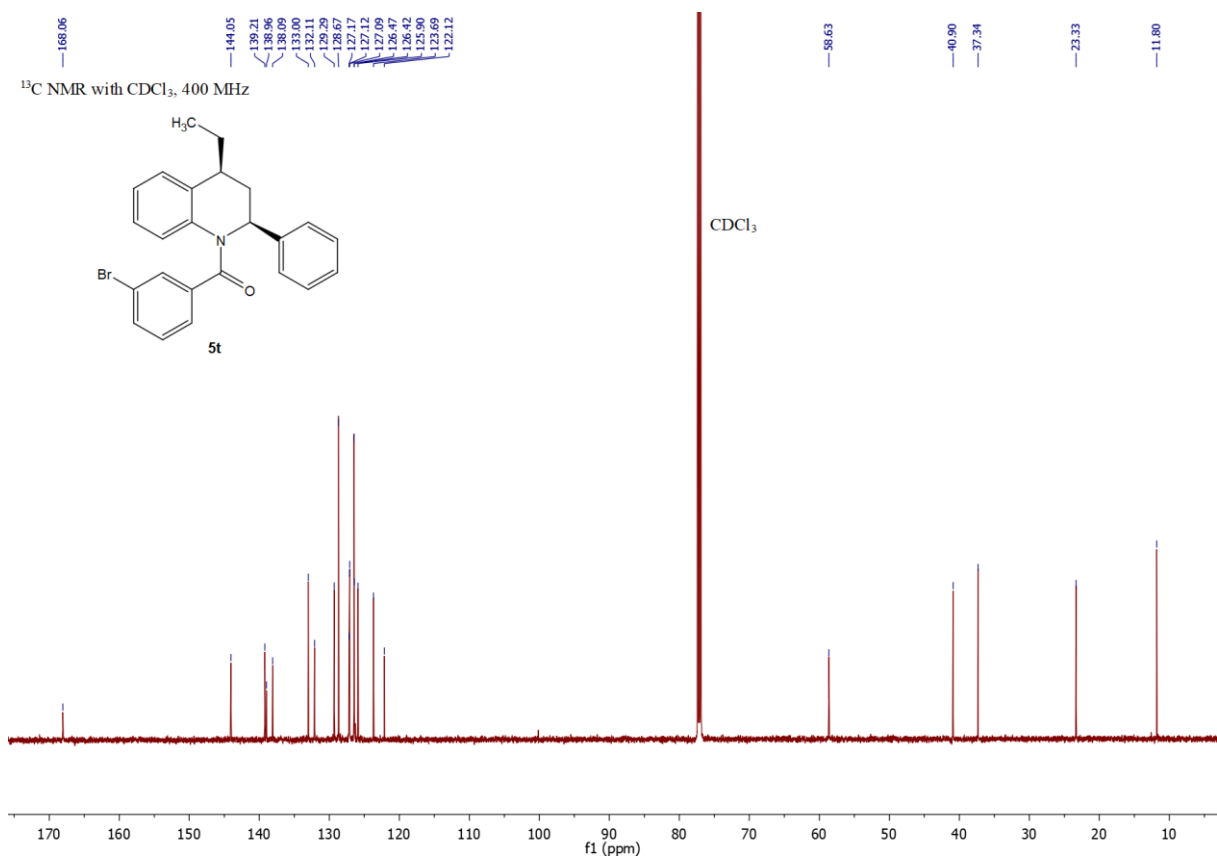

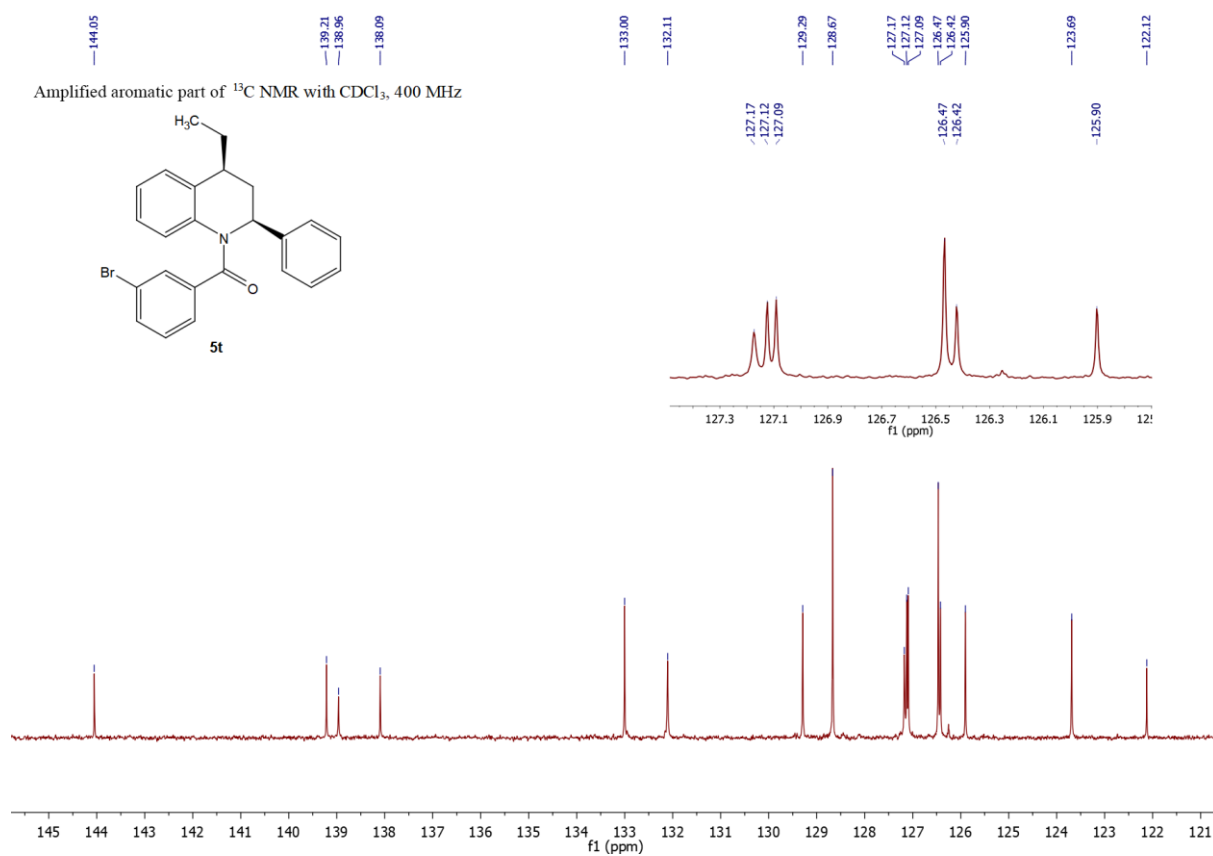

**Figure S63.** NMR spectra of (2*S*,4*S*)-1-(3-Bromophenyl)carbonyl-4-ethyl-2-phenyl-1,2,3,4-tetrahydroquinoline (**5t**)

## 11. HPLC and UV spectra

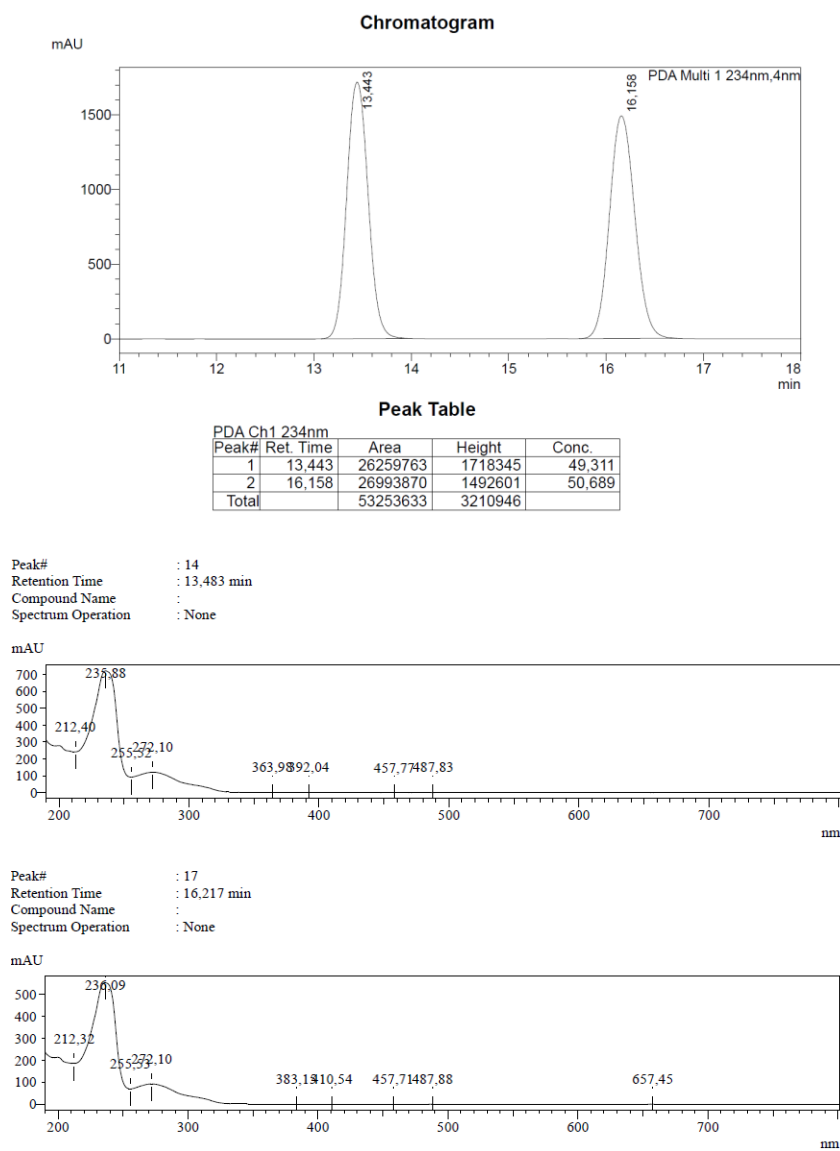

**Figure S64.** HPLC and UV spectra of 1-acetyl-2-ethyl-C2-dihydroquinoline (**2a**)

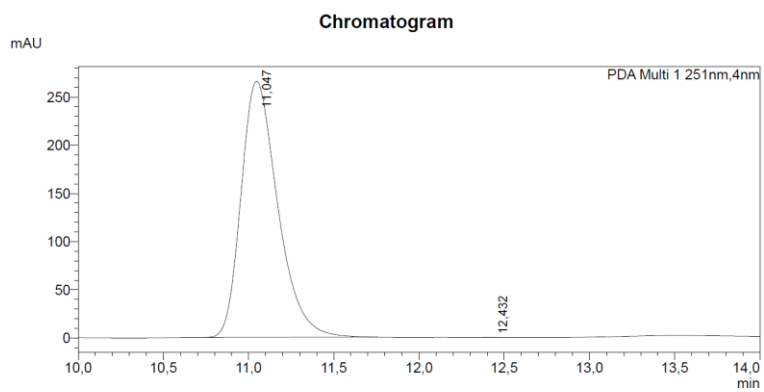

**Peak Table**

| PDA Ch1 251nm |           |                |               |        |
|---------------|-----------|----------------|---------------|--------|
| Peak#         | Ret. Time | Area           | Height        | Conc.  |
| 1             | 11,047    | 3984112        | 265756        | 99,986 |
| 2             | 12,432    | 557            | 60            | 0,014  |
| <b>Total</b>  |           | <b>3984669</b> | <b>265816</b> |        |

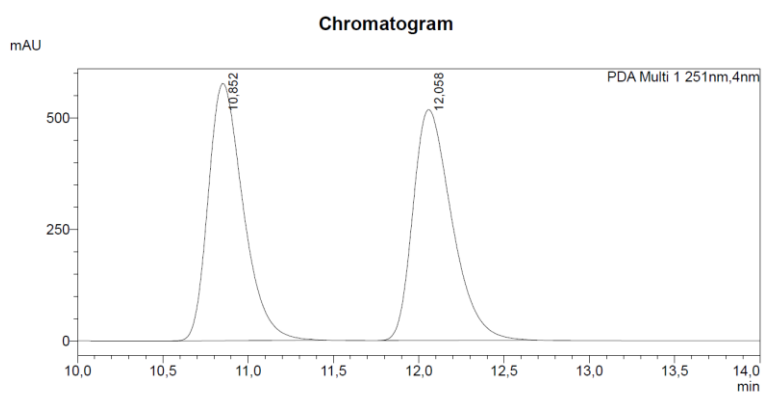

**Peak Table**

| PDA Ch1 251nm |           |                 |                |        |
|---------------|-----------|-----------------|----------------|--------|
| Peak#         | Ret. Time | Area            | Height         | Conc.  |
| 1             | 10,852    | 8227019         | 576334         | 50,053 |
| 2             | 12,058    | 8209518         | 516897         | 49,947 |
| <b>Total</b>  |           | <b>16436537</b> | <b>1093230</b> |        |

Peak# : 9  
 Retention Time : 10,852 min  
 Compound Name :  
 Spectrum Operation : None

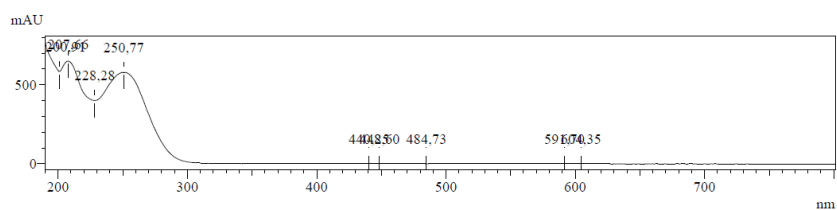

Peak# : 10  
 Retention Time : 12,058 min  
 Compound Name :  
 Spectrum Operation : None

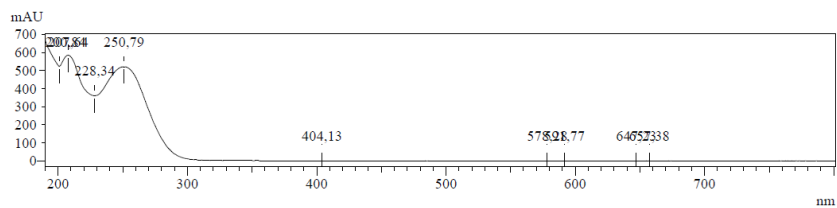

**Figure S65.** HPLC and UV spectra of (*S*)-1-acetyl-4-ethyl-C4-dihydroquinoline (**3a**)

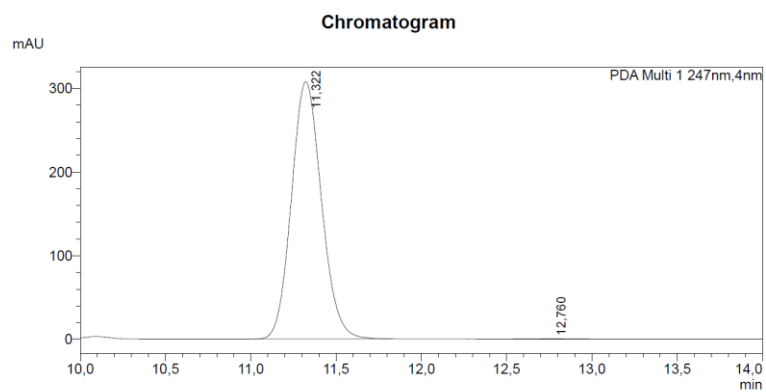

**Peak Table**

| PDA Ch1 247nm |           |                |               |        |
|---------------|-----------|----------------|---------------|--------|
| Peak#         | Ret. Time | Area           | Height        | Conc.  |
| 1             | 11,322    | 3768046        | 307485        | 99,887 |
| 2             | 12,760    | 4249           | 309           | 0,113  |
| <b>Total</b>  |           | <b>3772295</b> | <b>307794</b> |        |

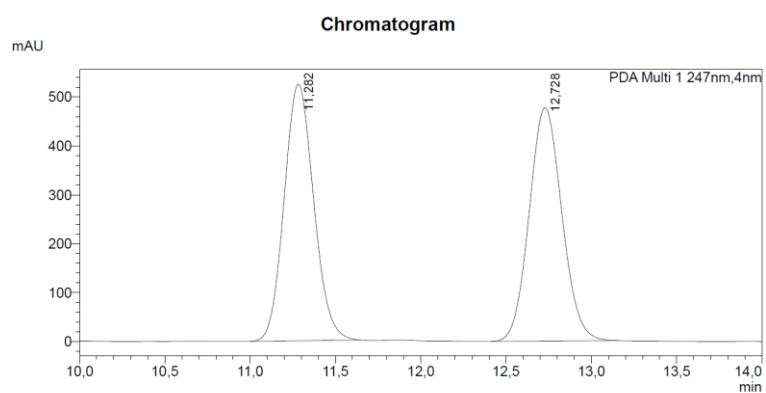

**Peak Table**

| PDA Ch1 247nm |           |                 |                |        |
|---------------|-----------|-----------------|----------------|--------|
| Peak#         | Ret. Time | Area            | Height         | Conc.  |
| 1             | 11,282    | 6331790         | 525036         | 49,883 |
| 2             | 12,728    | 6361409         | 477410         | 50,117 |
| <b>Total</b>  |           | <b>12693199</b> | <b>1002446</b> |        |

Peak# : 1  
 Retention Time : 11,397 min  
 Compound Name :  
 Spectrum Operation : None

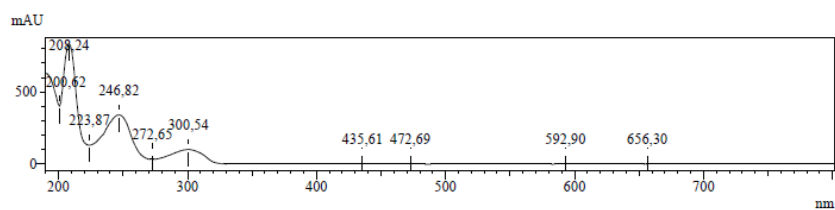

Peak# : 2  
 Retention Time : 12,890 min  
 Compound Name :  
 Spectrum Operation : None

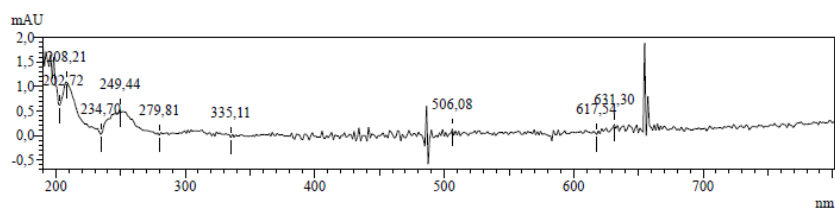

**Figure S66.** HPLC and UV spectra of (*S*)-4-Ethyl-1,2,3,4-tetrahydroquinoline (**4a**)



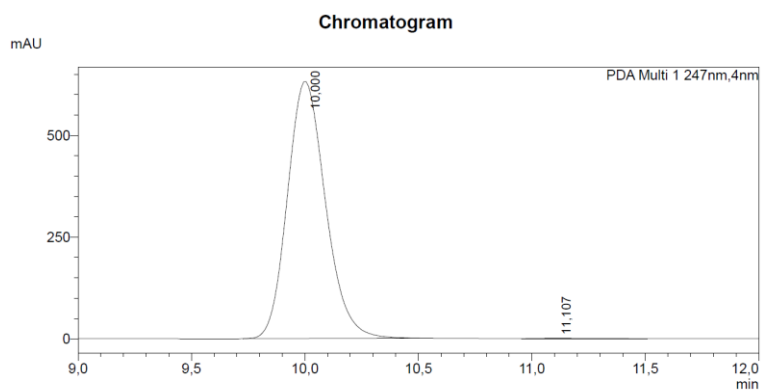

**Peak Table**

| PDA Ch1 247nm |           |                |               |        |
|---------------|-----------|----------------|---------------|--------|
| Peak#         | Ret. Time | Area           | Height        | Conc.  |
| 1             | 10.000    | 7384579        | 630868        | 99.802 |
| 2             | 11.107    | 14623          | 716           | 0.198  |
| <b>Total</b>  |           | <b>7399202</b> | <b>631584</b> |        |

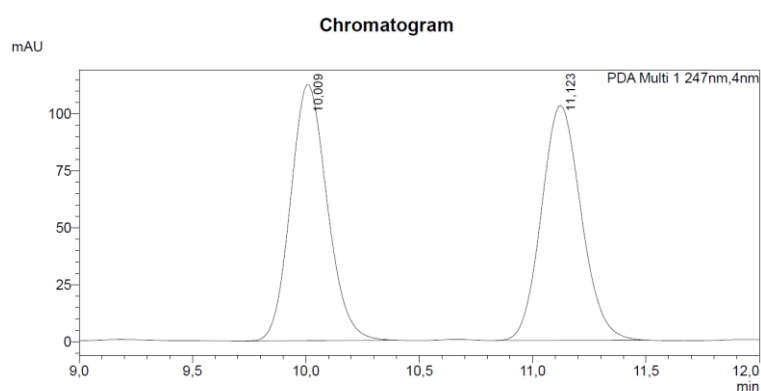

**Peak Table**

| PDA Ch1 247nm |           |                |               |        |
|---------------|-----------|----------------|---------------|--------|
| Peak#         | Ret. Time | Area           | Height        | Conc.  |
| 1             | 10.009    | 1263546        | 112336        | 50.144 |
| 2             | 11.123    | 1256313        | 103048        | 49.856 |
| <b>Total</b>  |           | <b>2519858</b> | <b>215384</b> |        |

Peak# : 9  
 Retention Time : 10.000 min  
 Compound Name :  
 Spectrum Operation : None

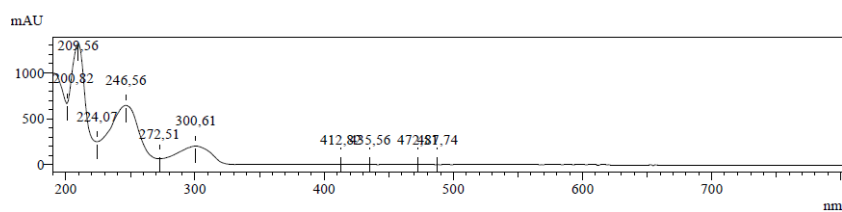

Peak# : 10  
 Retention Time : 11.109 min  
 Compound Name :  
 Spectrum Operation : None

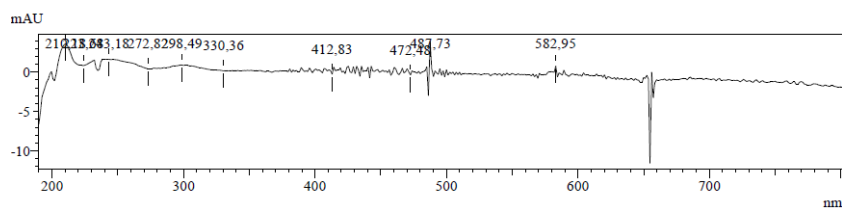

**Figure S67.** HPLC and UV spectra of (*S*)-4-Pentyl-1,2,3,4-tetrahydroquinoline (**4b**)

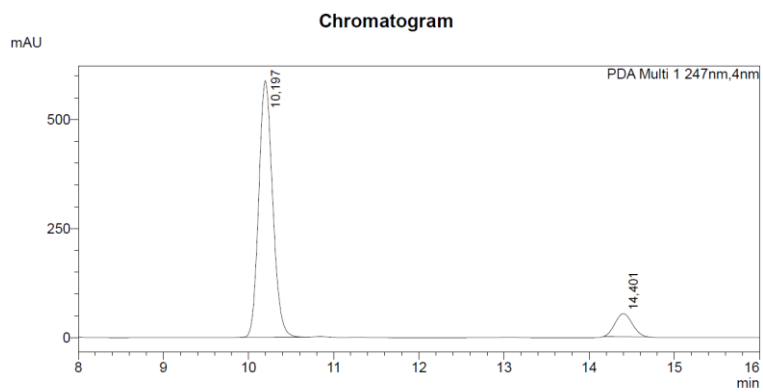

**Peak Table**

| PDA Ch1 247nm |           |                |               |        |
|---------------|-----------|----------------|---------------|--------|
| Peak#         | Ret. Time | Area           | Height        | Conc.  |
| 1             | 10.197    | 6685332        | 588080        | 89.922 |
| 2             | 14.401    | 749245         | 52988         | 10.078 |
| <b>Total</b>  |           | <b>7434577</b> | <b>641068</b> |        |

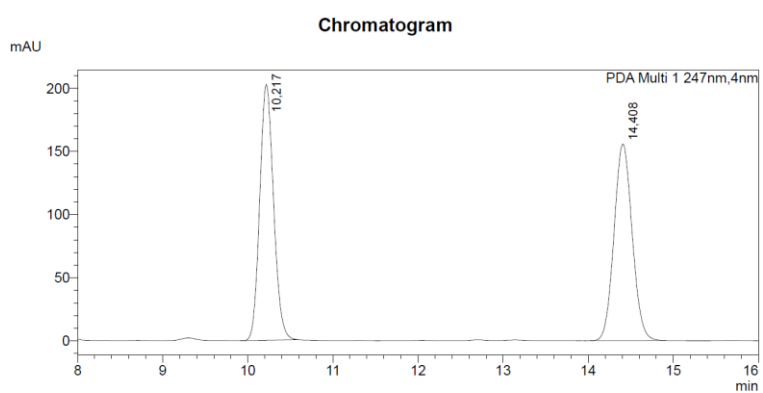

**Peak Table**

| PDA Ch1 247nm |           |                |               |        |
|---------------|-----------|----------------|---------------|--------|
| Peak#         | Ret. Time | Area           | Height        | Conc.  |
| 1             | 10.217    | 2293884        | 202647        | 49.821 |
| 2             | 14.408    | 2310375        | 155734        | 50.179 |
| <b>Total</b>  |           | <b>4604259</b> | <b>358381</b> |        |

Peak# : 5  
 Retention Time : 10.197 min  
 Compound Name :  
 Spectrum Operation : None

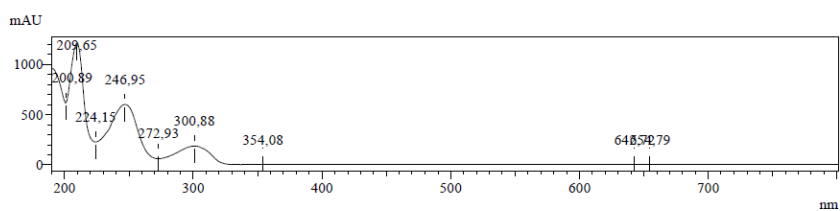

Peak# : 10  
 Retention Time : 14.401 min  
 Compound Name :  
 Spectrum Operation : None

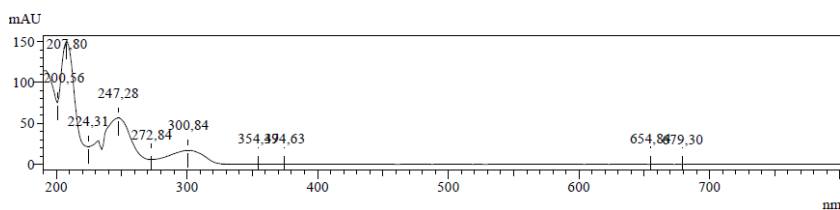

**Figure S68.** HPLC and UV spectra of (*R*)-4-(1-methylethyl)-1,2,3,4-tetrahydroquinoline (**4c**)

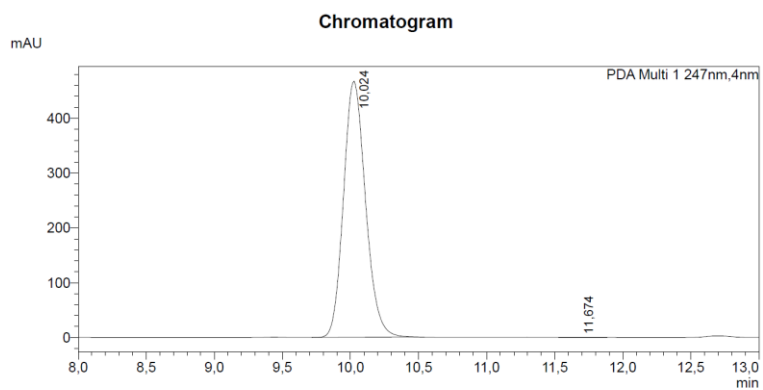

**Peak Table**

| PDA Ch1 247nm |           |                |               |        |
|---------------|-----------|----------------|---------------|--------|
| Peak#         | Ret. Time | Area           | Height        | Conc.  |
| 1             | 10.024    | 5264042        | 467234        | 99.952 |
| 2             | 11.674    | 2550           | 247           | 0.048  |
| <b>Total</b>  |           | <b>5266592</b> | <b>467481</b> |        |

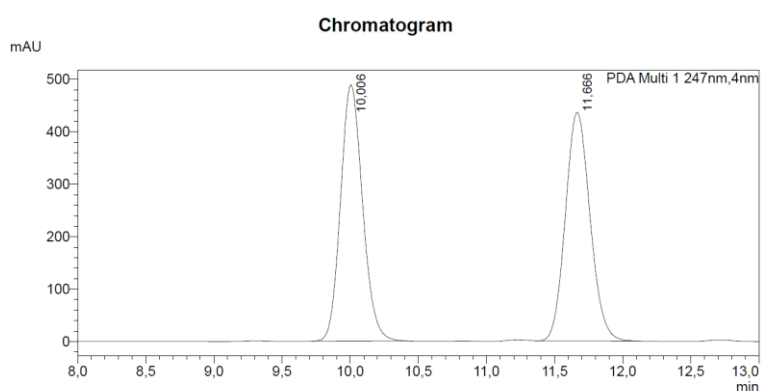

**Peak Table**

| PDA Ch1 247nm |           |                 |               |        |
|---------------|-----------|-----------------|---------------|--------|
| Peak#         | Ret. Time | Area            | Height        | Conc.  |
| 1             | 10.006    | 5500897         | 488819        | 50.038 |
| 2             | 11.666    | 5492561         | 435884        | 49.962 |
| <b>Total</b>  |           | <b>10993458</b> | <b>924703</b> |        |

Peak# : 7  
 Retention Time : 10.024 min  
 Compound Name :  
 Spectrum Operation : None

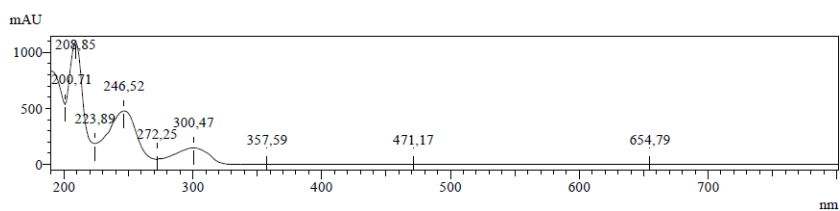

Peak# : 9  
 Retention Time : 11.681 min  
 Compound Name :  
 Spectrum Operation : None

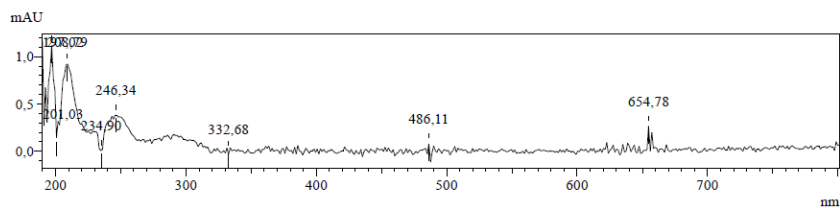

**Figure S69.** HPLC and UV spectra of (*S*)-4-(2-methylpropyl)-1,2,3,4-tetrahydroquinoline (**4d**)

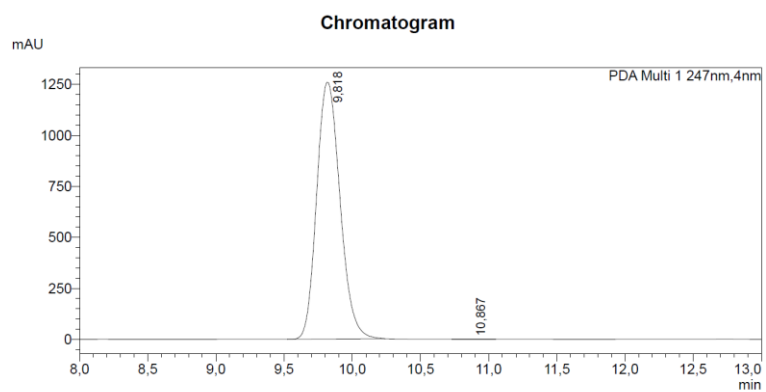

**Peak Table**

| PDA Ch1 247nm |           |                 |                |        |
|---------------|-----------|-----------------|----------------|--------|
| Peak#         | Ret. Time | Area            | Height         | Conc.  |
| 1             | 9,818     | 15010420        | 1258592        | 99,971 |
| 2             | 10,867    | 4423            | 450            | 0,029  |
| <b>Total</b>  |           | <b>15014843</b> | <b>1259041</b> |        |

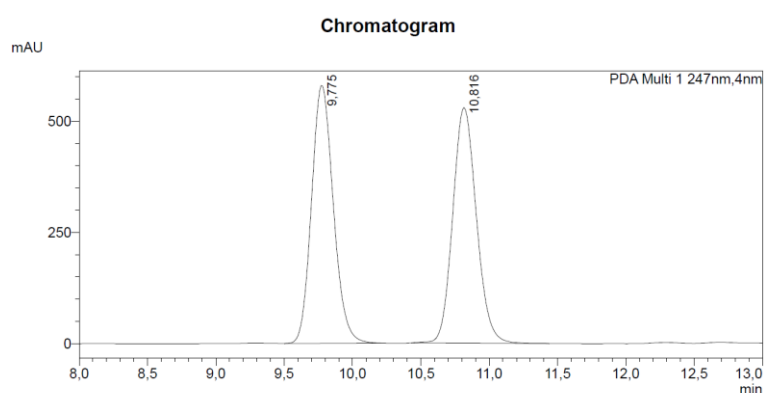

**Peak Table**

| PDA Ch1 247nm |           |                 |                |        |
|---------------|-----------|-----------------|----------------|--------|
| Peak#         | Ret. Time | Area            | Height         | Conc.  |
| 1             | 9,775     | 6437798         | 579345         | 50,238 |
| 2             | 10,816    | 6376736         | 529746         | 49,762 |
| <b>Total</b>  |           | <b>12814534</b> | <b>1109091</b> |        |

Peak# : 10  
 Retention Time : 9,818 min  
 Compound Name :  
 Spectrum Operation : None

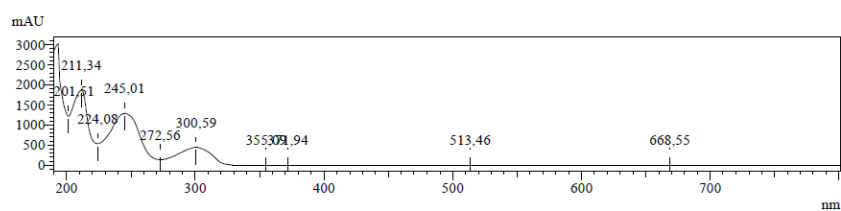

Peak# : 11  
 Retention Time : 10,868 min  
 Compound Name :  
 Spectrum Operation : None

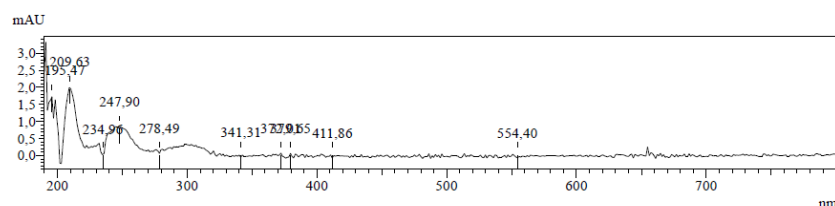

**Figure S70.** HPLC and UV spectra of (*S*)-4-(3-methylbutyl)-1,2,3,4-tetrahydroquinoline (**4e**)

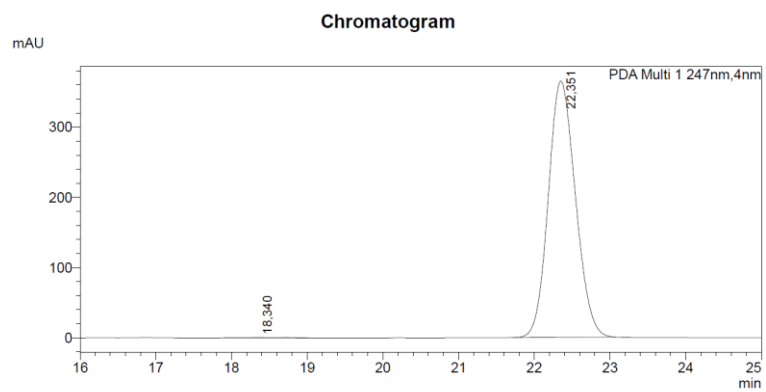

**Peak Table**

| PDA Ch1 247nm |           |                |               |        |
|---------------|-----------|----------------|---------------|--------|
| Peak#         | Ret. Time | Area           | Height        | Conc.  |
| 1             | 18.340    | 12520          | 338           | 0.137  |
| 2             | 22.351    | 9095544        | 364729        | 99.863 |
| <b>Total</b>  |           | <b>9108064</b> | <b>365066</b> |        |

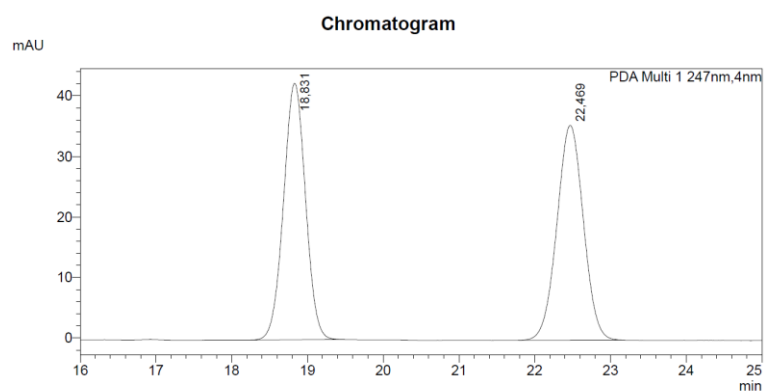

**Peak Table**

| PDA Ch1 247nm |           |                |              |        |
|---------------|-----------|----------------|--------------|--------|
| Peak#         | Ret. Time | Area           | Height       | Conc.  |
| 1             | 18.831    | 853385         | 42328        | 49.700 |
| 2             | 22.469    | 863700         | 35476        | 50.300 |
| <b>Total</b>  |           | <b>1717085</b> | <b>77804</b> |        |

Peak# : 1  
 Retention Time : 18.340 min  
 Compound Name :  
 Spectrum Operation : None

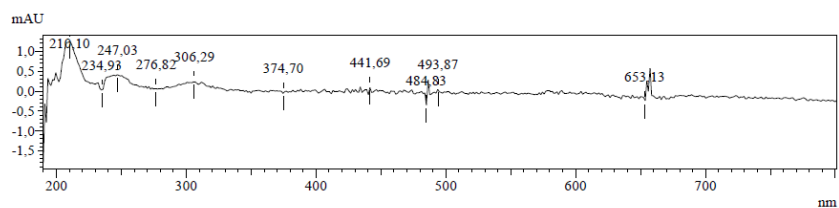

Peak# : 2  
 Retention Time : 22.351 min  
 Compound Name :  
 Spectrum Operation : None

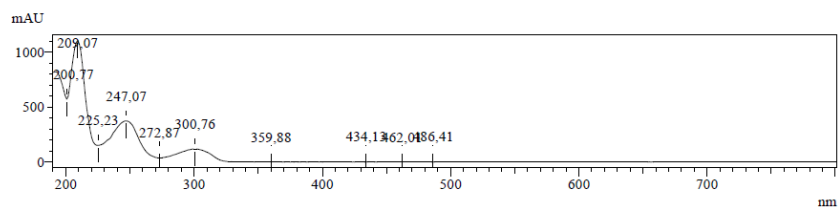

**Figure S71.** HPLC and UV spectra of (*S*)-4-(3-Phenylpropyl)-1,2,3,4-tetrahydroquinoline (**4f**)

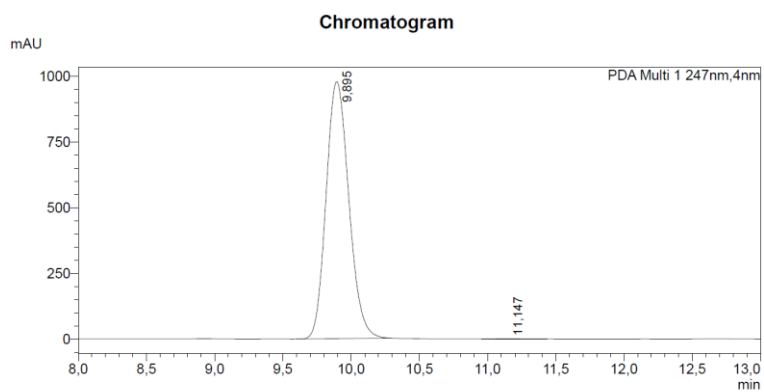

**Peak Table**

| PDA Ch1 247nm |           |          |        |        |
|---------------|-----------|----------|--------|--------|
| Peak#         | Ret. Time | Area     | Height | Conc.  |
| 1             | 9.895     | 11349938 | 976578 | 99.879 |
| 2             | 11.147    | 13775    | 1135   | 0.121  |
| Total         |           | 11363713 | 977713 |        |

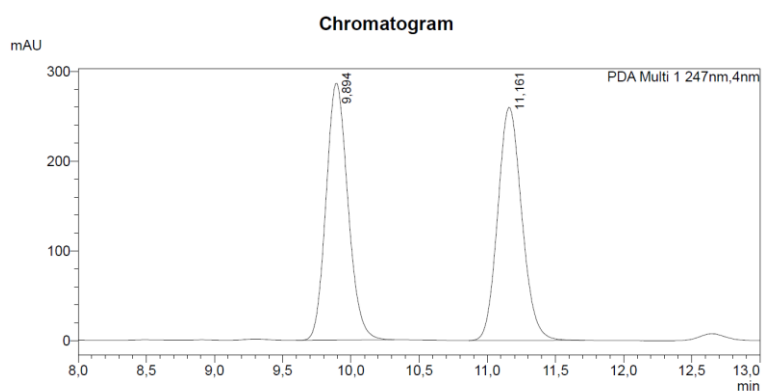

**Peak Table**

| PDA Ch1 247nm |           |         |        |        |
|---------------|-----------|---------|--------|--------|
| Peak#         | Ret. Time | Area    | Height | Conc.  |
| 1             | 9.894     | 3198899 | 285786 | 50.032 |
| 2             | 11.161    | 3194796 | 259732 | 49.968 |
| Total         |           | 6393695 | 545518 |        |

Peak# : 13  
 Retention Time : 9.895 min  
 Compound Name :  
 Spectrum Operation : None

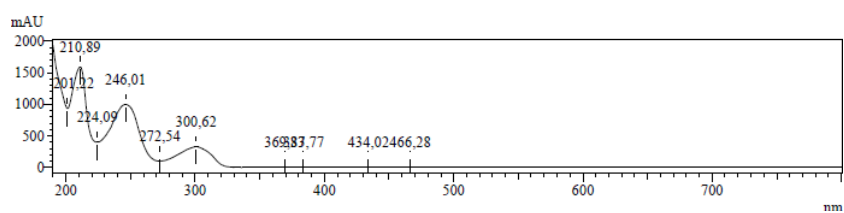

Peak# : 15  
 Retention Time : 11.148 min  
 Compound Name :  
 Spectrum Operation : None

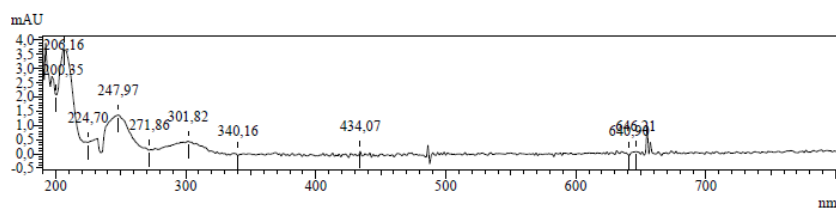

**Figure S72.** HPLC and UV spectra of (*S*)-4-(Hept-6-en-1-yl)-1,2,3,4-tetrahydroquinoline (**4g**)

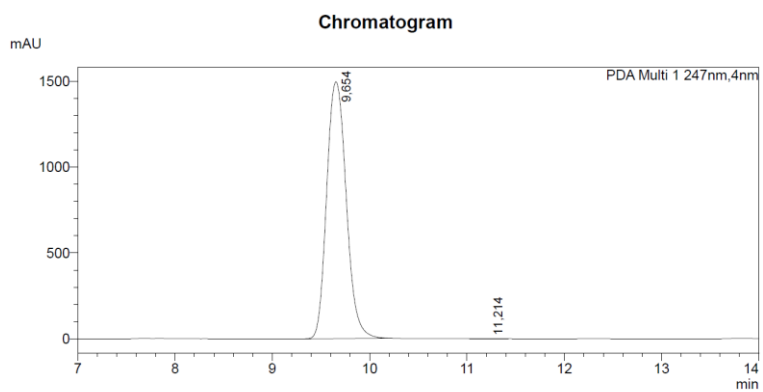

**Peak Table**

| PDA Ch1 247nm |           |                 |                |        |
|---------------|-----------|-----------------|----------------|--------|
| Peak#         | Ret. Time | Area            | Height         | Conc.  |
| 1             | 9,654     | 20936113        | 1496918        | 99,968 |
| 2             | 11,214    | 6667            | 576            | 0,032  |
| <b>Total</b>  |           | <b>20942781</b> | <b>1497494</b> |        |

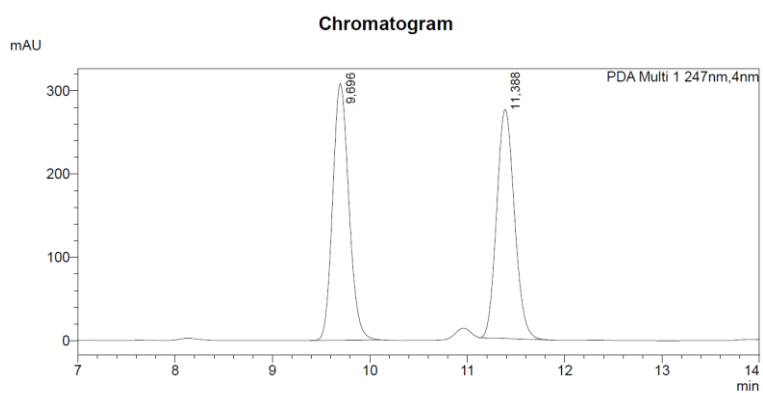

**Peak Table**

| PDA Ch1 247nm |           |                |               |        |
|---------------|-----------|----------------|---------------|--------|
| Peak#         | Ret. Time | Area           | Height        | Conc.  |
| 1             | 9,696     | 3559109        | 308222        | 50,489 |
| 2             | 11,388    | 3490126        | 274976        | 49,511 |
| <b>Total</b>  |           | <b>7049235</b> | <b>583199</b> |        |

Peak# : 7  
 Retention Time : 9,643 min  
 Compound Name :  
 Spectrum Operation : None

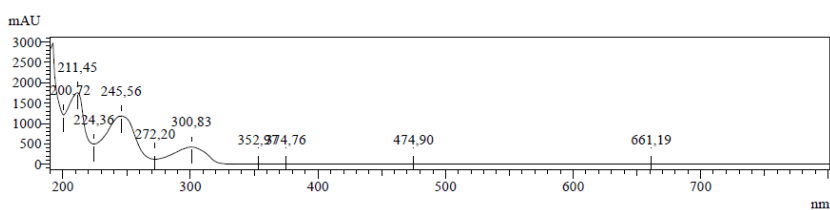

Peak# : 9  
 Retention Time : 11,305 min  
 Compound Name :  
 Spectrum Operation : None

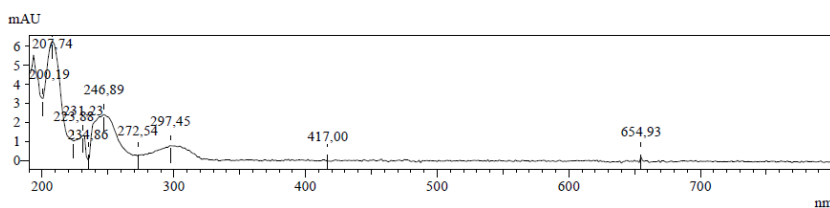

**Figure S73.** HPLC and UV spectra of (*R*)-4-(2-Trimethylsilylethyl)-1,2,3,4-tetrahydroquinoline (**4h**)

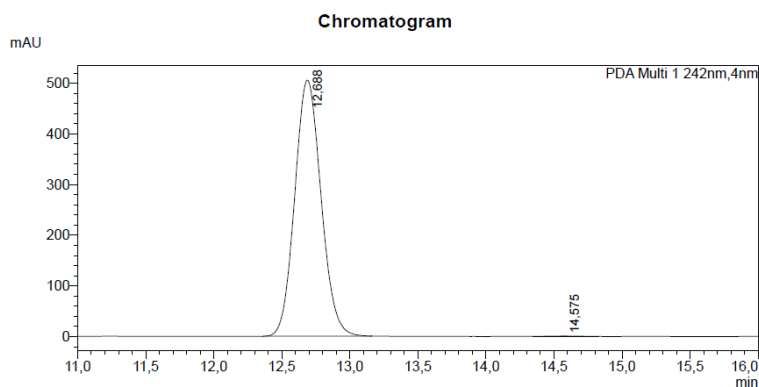

**Peak Table**

| PDA Ch1 242nm |           |                |               |        |
|---------------|-----------|----------------|---------------|--------|
| Peak#         | Ret. Time | Area           | Height        | Conc.  |
| 1             | 12.688    | 6803348        | 505018        | 99.793 |
| 2             | 14.575    | 14085          | 1033          | 0.207  |
| <b>Total</b>  |           | <b>6817433</b> | <b>506051</b> |        |

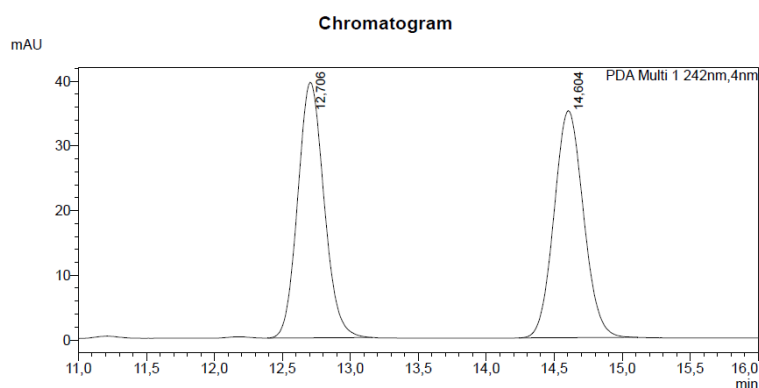

**Peak Table**

| PDA Ch1 242nm |           |                |              |        |
|---------------|-----------|----------------|--------------|--------|
| Peak#         | Ret. Time | Area           | Height       | Conc.  |
| 1             | 12.706    | 532195         | 39526        | 50.108 |
| 2             | 14.604    | 529903         | 35125        | 49.892 |
| <b>Total</b>  |           | <b>1062098</b> | <b>74651</b> |        |

Peak# : 10  
 Retention Time : 12.688 min  
 Compound Name :  
 Spectrum Operation : None

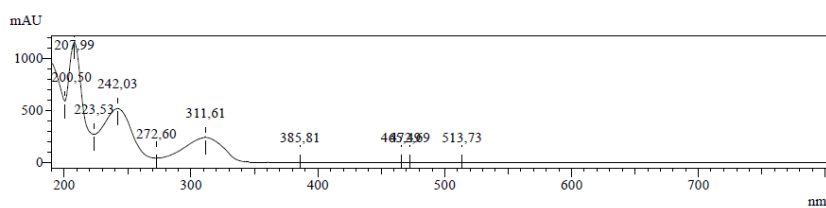

Peak# : 11  
 Retention Time : 14.579 min  
 Compound Name :  
 Spectrum Operation : None

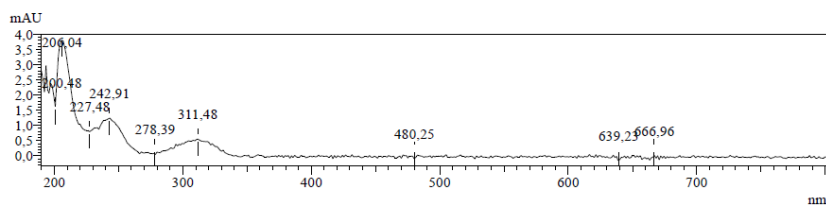

**Figure S74.** HPLC and UV spectra of (*S*)-4-Ethyl-6-fluoro-1,2,3,4-tetrahydroquinoline (**5a**)



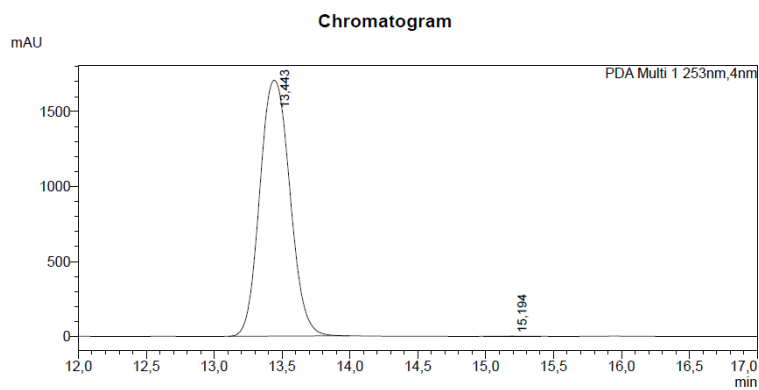

**Peak Table**

| PDA Ch1 253nm |           |                 |                |        |
|---------------|-----------|-----------------|----------------|--------|
| Peak#         | Ret. Time | Area            | Height         | Conc.  |
| 1             | 13.443    | 26305351        | 1706658        | 99.941 |
| 2             | 15.194    | 15399           | 1164           | 0.059  |
| <b>Total</b>  |           | <b>26320750</b> | <b>1707823</b> |        |

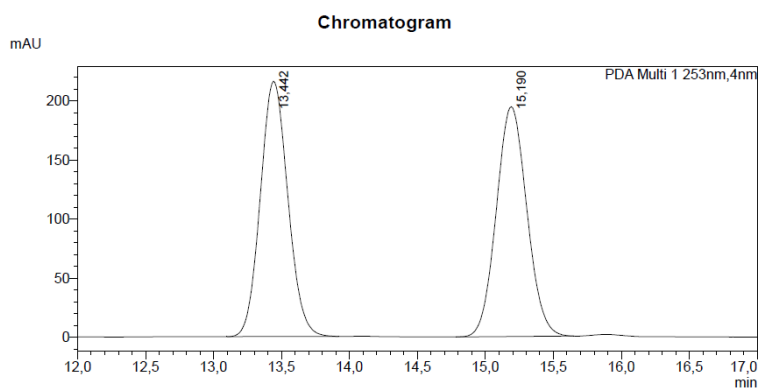

**Peak Table**

| PDA Ch1 253nm |           |                |               |        |
|---------------|-----------|----------------|---------------|--------|
| Peak#         | Ret. Time | Area           | Height        | Conc.  |
| 1             | 13.442    | 3045739        | 215923        | 49.991 |
| 2             | 15.190    | 3046884        | 194456        | 50.009 |
| <b>Total</b>  |           | <b>6092623</b> | <b>410378</b> |        |

Peak# : 1  
 Retention Time : 13.443 min  
 Compound Name :  
 Spectrum Operation : None

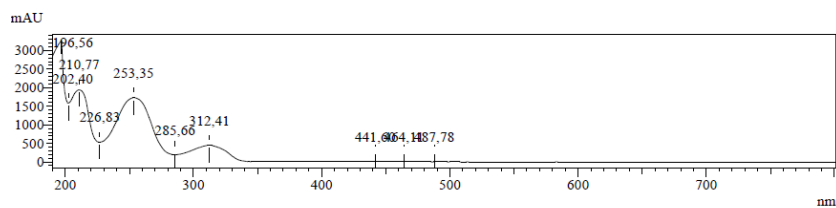

Peak# : 2  
 Retention Time : 15.195 min  
 Compound Name :  
 Spectrum Operation : None

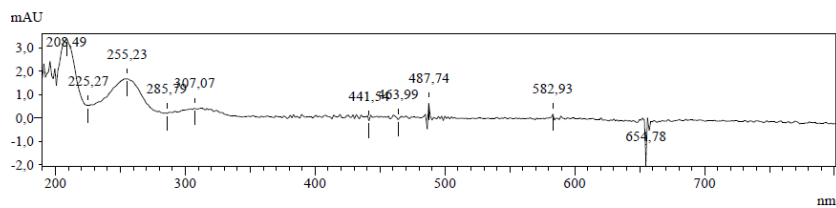

**Figure S75.** HPLC and UV spectra of (S)-6-Bromo-4-ethyl-1,2,3,4-tetrahydroquinoline (**5b**)

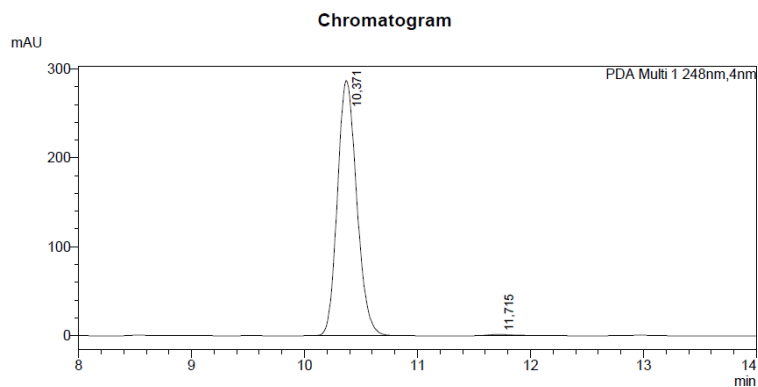

**Peak Table**

| PDA Ch1 248nm |           |                |               |        |
|---------------|-----------|----------------|---------------|--------|
| Peak#         | Ret. Time | Area           | Height        | Conc.  |
| 1             | 10.371    | 3402911        | 286634        | 99.549 |
| 2             | 11.715    | 15425          | 1218          | 0.451  |
| <b>Total</b>  |           | <b>3418337</b> | <b>287852</b> |        |

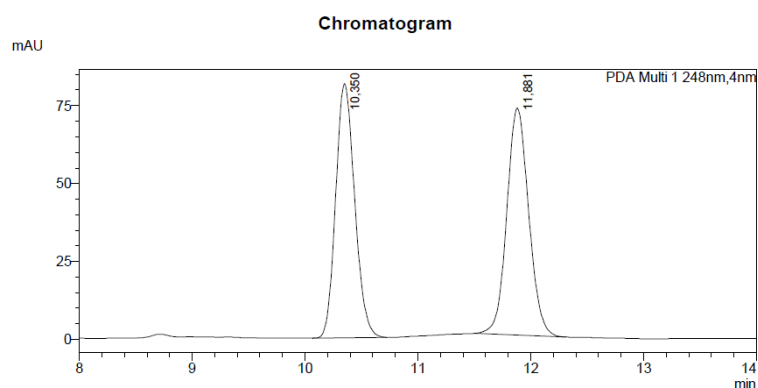

**Peak Table**

| PDA Ch1 248nm |           |                |               |        |
|---------------|-----------|----------------|---------------|--------|
| Peak#         | Ret. Time | Area           | Height        | Conc.  |
| 1             | 10.350    | 956839         | 81551         | 49.310 |
| 2             | 11.881    | 983624         | 72828         | 50.690 |
| <b>Total</b>  |           | <b>1940463</b> | <b>154379</b> |        |

Peak# : 1  
 Retention Time : 10.371 min  
 Compound Name :  
 Spectrum Operation : None

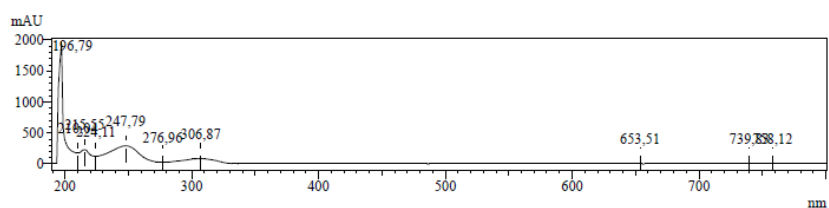

Peak# : 2  
 Retention Time : 11.715 min  
 Compound Name :  
 Spectrum Operation : None

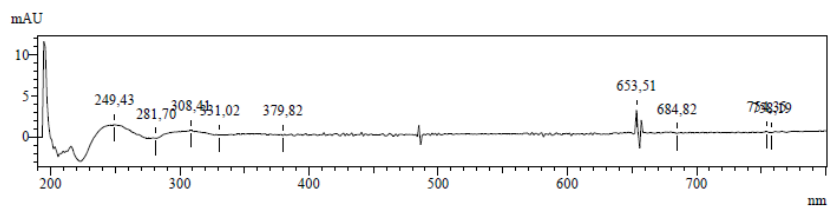

**Figure S76.** HPLC and UV spectra of (*S*)-4-Ethyl-6-methyl-1,2,3,4-tetrahydroquinoline (**5c**)

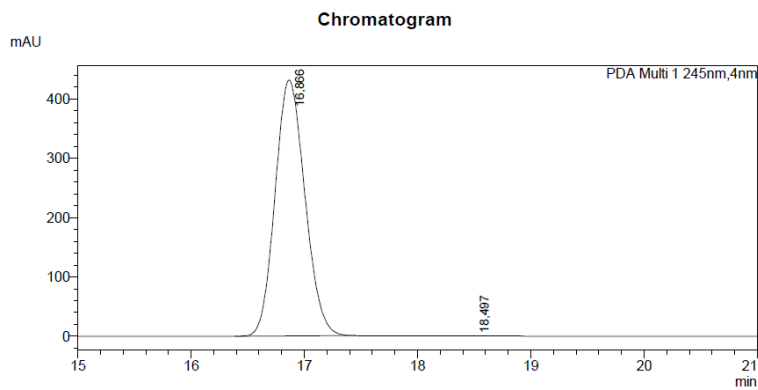

**Peak Table**

| PDA Ch1 245nm |           |                |               |        |
|---------------|-----------|----------------|---------------|--------|
| Peak#         | Ret. Time | Area           | Height        | Conc.  |
| 1             | 16.866    | 7894517        | 431093        | 99.944 |
| 2             | 18.497    | 4418           | 231           | 0.056  |
| <b>Total</b>  |           | <b>7898935</b> | <b>431324</b> |        |

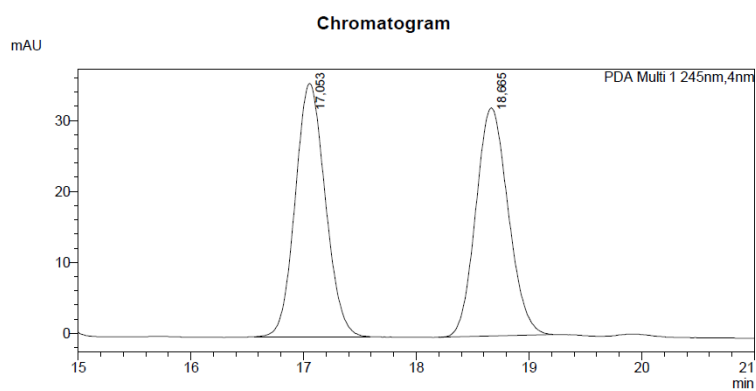

**Peak Table**

| PDA Ch1 245nm |           |                |              |        |
|---------------|-----------|----------------|--------------|--------|
| Peak#         | Ret. Time | Area           | Height       | Conc.  |
| 1             | 17.053    | 660523         | 35666        | 50.683 |
| 2             | 18.665    | 642728         | 32142        | 49.317 |
| <b>Total</b>  |           | <b>1303251</b> | <b>67808</b> |        |

Peak# : 1  
 Retention Time : 16.866 min  
 Compound Name :  
 Spectrum Operation : None

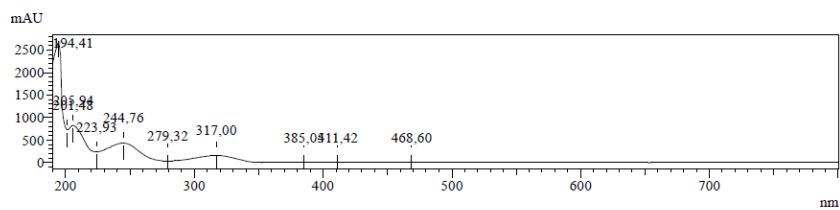

Peak# : 2  
 Retention Time : 18.497 min  
 Compound Name :  
 Spectrum Operation : None

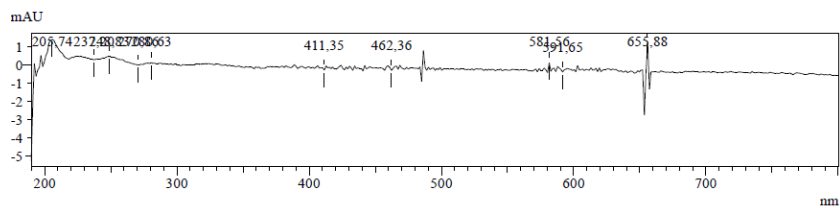

**Figure S77.** HPLC and UV spectra of (*S*)-4-Ethyl-6-methoxy-1,2,3,4-tetrahydroquinoline (**5d**)

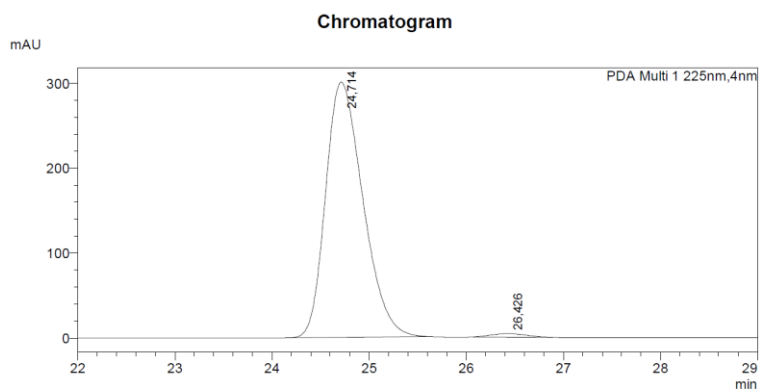

**Peak Table**

| PDA Ch1 225nm |           |                |               |        |
|---------------|-----------|----------------|---------------|--------|
| Peak#         | Ret. Time | Area           | Height        | Conc.  |
| 1             | 24,714    | 8050347        | 300692        | 98,764 |
| 2             | 26,426    | 100733         | 4079          | 1,236  |
| <b>Total</b>  |           | <b>8151079</b> | <b>304771</b> |        |

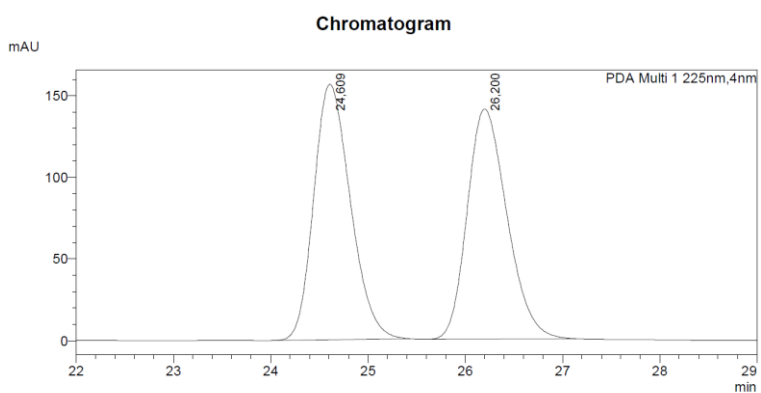

**Peak Table**

| PDA Ch1 225nm |           |                |               |        |
|---------------|-----------|----------------|---------------|--------|
| Peak#         | Ret. Time | Area           | Height        | Conc.  |
| 1             | 24,609    | 4110255        | 156552        | 50,631 |
| 2             | 26,200    | 4007820        | 140949        | 49,369 |
| <b>Total</b>  |           | <b>8118075</b> | <b>297501</b> |        |

Peak# : 1  
 Retention Time : 24,714 min  
 Compound Name :  
 Spectrum Operation : None

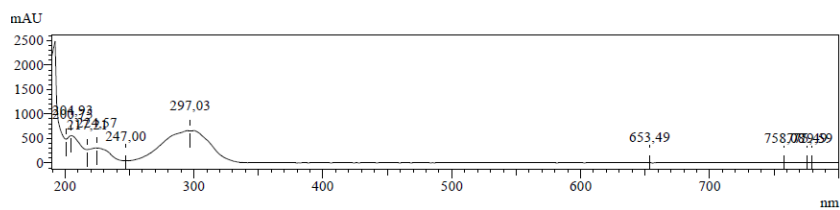

Peak# : 2  
 Retention Time : 26,426 min  
 Compound Name :  
 Spectrum Operation : None

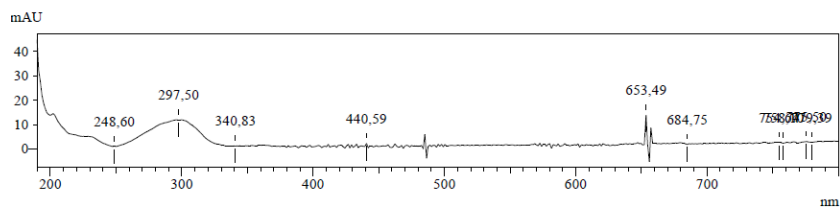

**Figure S78.** HPLC and UV spectra of (*S*)-Methyl 4-ethyl-1,2,3,4-tetrahydroquinoline-6-carboxylate (**5e**)

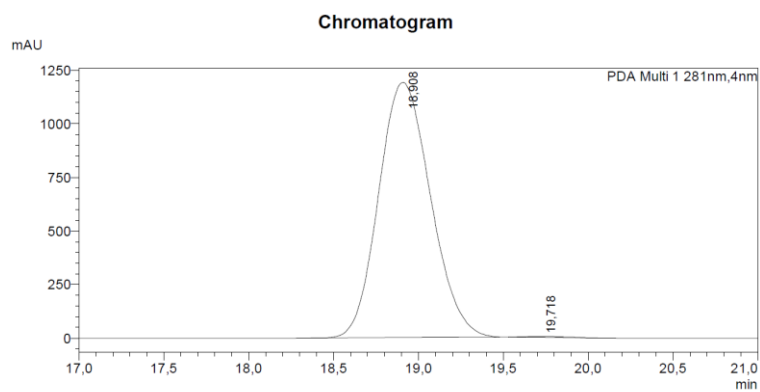

**Peak Table**

| PDA Ch1 281nm |           |          |         |        |
|---------------|-----------|----------|---------|--------|
| Peak#         | Ret. Time | Area     | Height  | Conc.  |
| 1             | 18,908    | 25316226 | 1190497 | 99,666 |
| 2             | 19,718    | 84800    | 5209    | 0,334  |
| Total         |           | 25401026 | 1195706 |        |

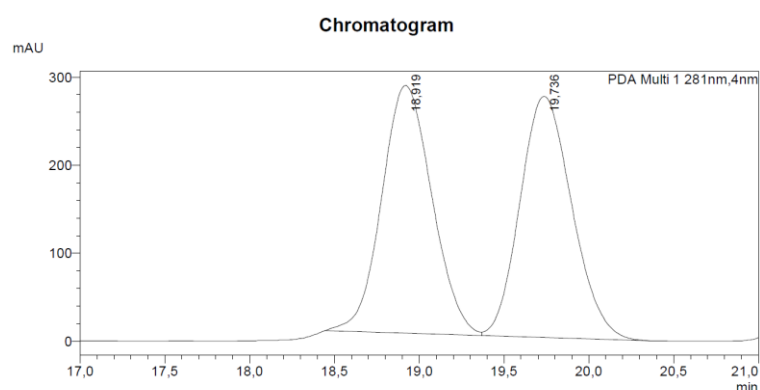

**Peak Table**

| PDA Ch1 281nm |           |          |        |        |
|---------------|-----------|----------|--------|--------|
| Peak#         | Ret. Time | Area     | Height | Conc.  |
| 1             | 18,919    | 5805412  | 281541 | 49,917 |
| 2             | 19,736    | 5824703  | 274092 | 50,083 |
| Total         |           | 11630115 | 555633 |        |

Peak# : 1  
 Retention Time : 18,915 min  
 Compound Name :  
 Spectrum Operation : None

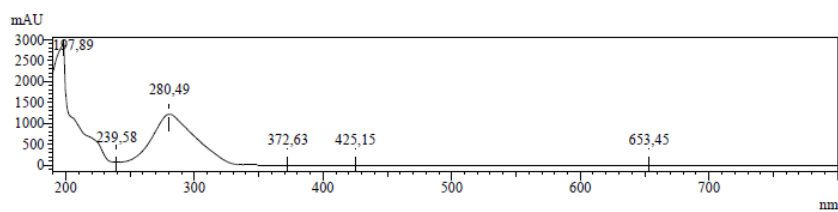

Peak# : 2  
 Retention Time : 19,726 min  
 Compound Name :  
 Spectrum Operation : None

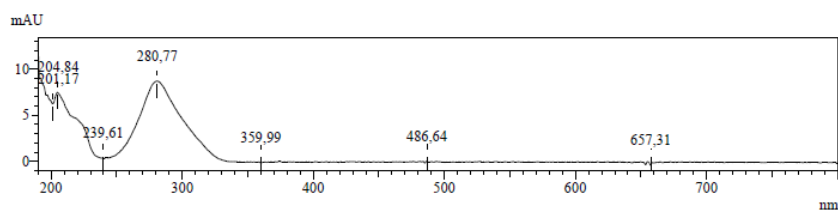

**Figure S79.** HPLC and UV spectra of (*S*)-6-Cyano-4-ethyl-1,2,3,4-tetrahydroquinoline (**5f**)

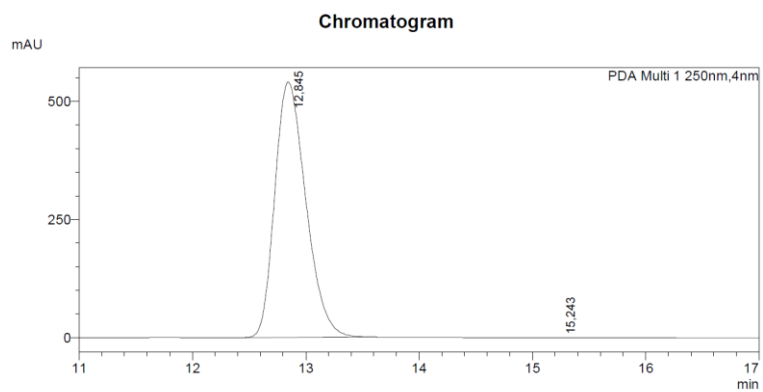

**Peak Table**

| PDA Ch1 250nm |           |                 |               |        |
|---------------|-----------|-----------------|---------------|--------|
| Peak#         | Ret. Time | Area            | Height        | Conc.  |
| 1             | 12.845    | 10307813        | 540507        | 99.966 |
| 2             | 15.243    | 3485            | 152           | 0.034  |
| <b>Total</b>  |           | <b>10311298</b> | <b>540659</b> |        |

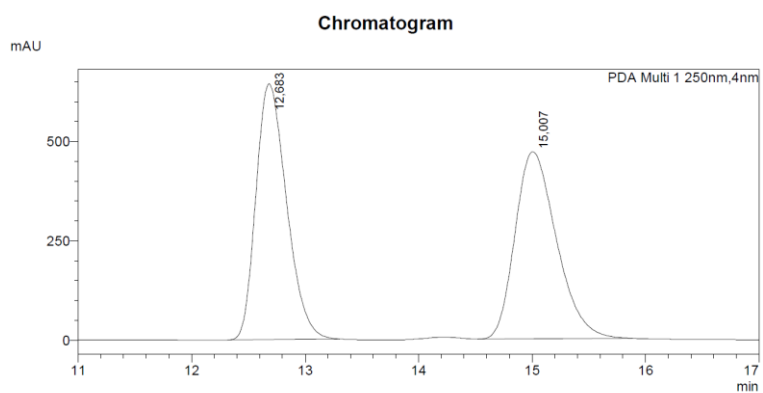

**Peak Table**

| PDA Ch1 250nm |           |                 |                |        |
|---------------|-----------|-----------------|----------------|--------|
| Peak#         | Ret. Time | Area            | Height         | Conc.  |
| 1             | 12.683    | 12064487        | 643122         | 50.290 |
| 2             | 15.007    | 11925215        | 470107         | 49.710 |
| <b>Total</b>  |           | <b>23989703</b> | <b>1113230</b> |        |

Peak# : 1  
 Retention Time : 12.845 min  
 Compound Name :  
 Spectrum Operation : None

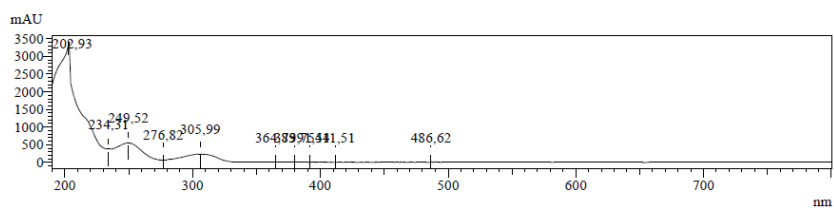

Peak# : 2  
 Retention Time : 15.235 min  
 Compound Name :  
 Spectrum Operation : None

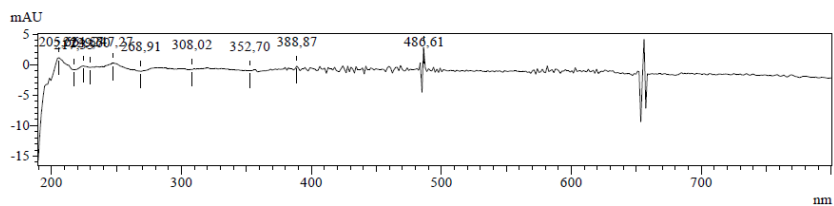

**Figure S80.** HPLC and UV spectra of (*S*)-7-Bromo-4-ethyl-1,2,3,4-tetrahydroquinoline (**5g**)

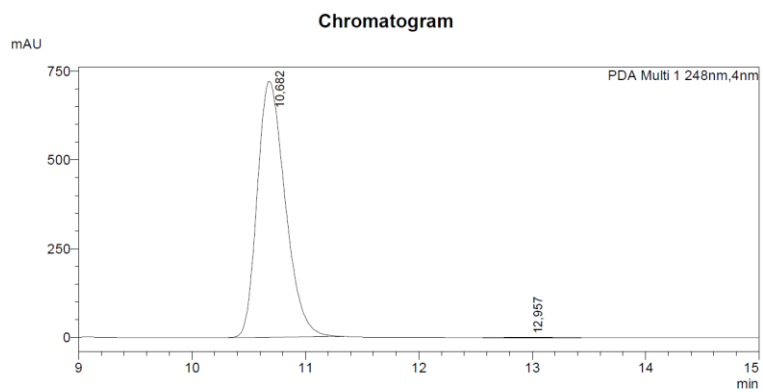

**Peak Table**

| PDA Ch1 248nm |           |                 |               |        |
|---------------|-----------|-----------------|---------------|--------|
| Peak#         | Ret. Time | Area            | Height        | Conc.  |
| 1             | 10.682    | 12328349        | 720178        | 99.948 |
| 2             | 12.957    | 6408            | 284           | 0.052  |
| <b>Total</b>  |           | <b>12334757</b> | <b>720462</b> |        |

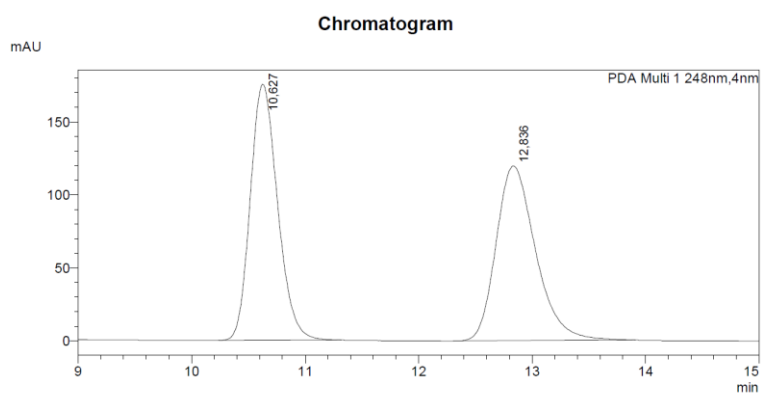

**Peak Table**

| PDA Ch1 248nm |           |                |               |        |
|---------------|-----------|----------------|---------------|--------|
| Peak#         | Ret. Time | Area           | Height        | Conc.  |
| 1             | 10.627    | 2934148        | 175261        | 50.334 |
| 2             | 12.836    | 2895161        | 119567        | 49.666 |
| <b>Total</b>  |           | <b>5829309</b> | <b>294828</b> |        |

Peak# : 1  
 Retention Time : 10.682 min  
 Compound Name :  
 Spectrum Operation : None

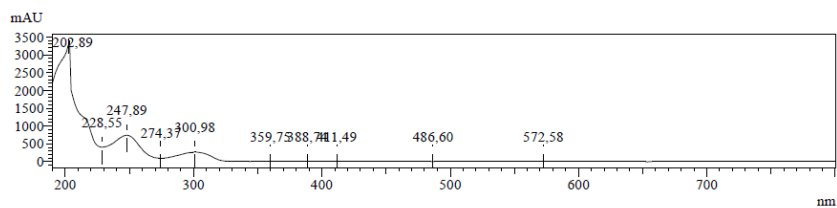

Peak# : 2  
 Retention Time : 12.981 min  
 Compound Name :  
 Spectrum Operation : None

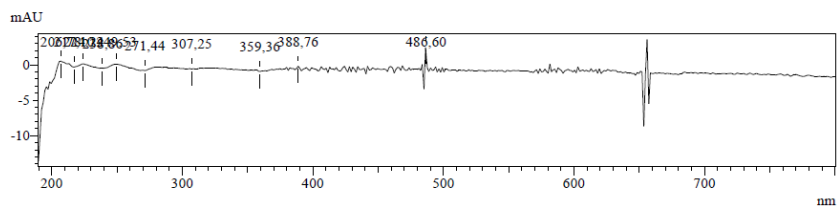

**Figure S81.** HPLC and UV spectra of (*S*)-4-Ethyl-7-methyl-1,2,3,4-tetrahydroquinoline (**5h**)

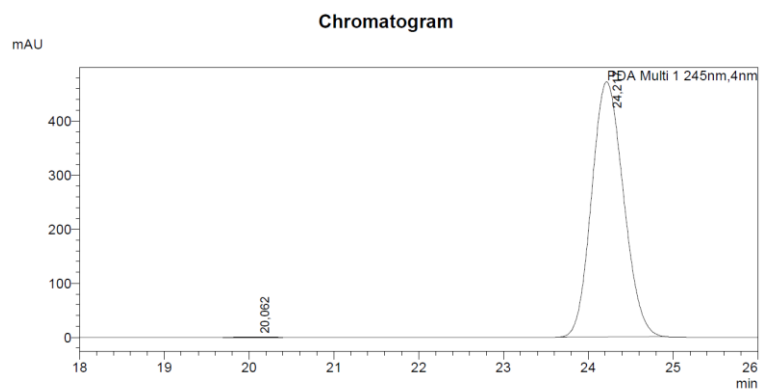

**Peak Table**

| Peak# | Ret. Time | Area     | Height | Conc.  |
|-------|-----------|----------|--------|--------|
| 1     | 20.062    | 14321    | 738    | 0.116  |
| 2     | 24.217    | 12335148 | 472239 | 99.884 |
| Total |           | 12349468 | 472977 |        |

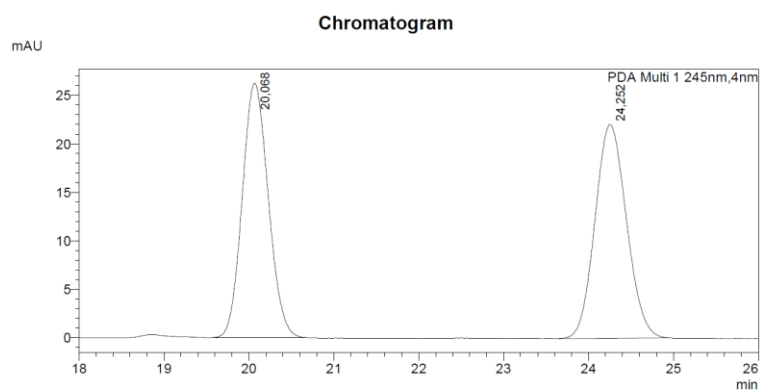

**Peak Table**

| Peak# | Ret. Time | Area    | Height | Conc.  |
|-------|-----------|---------|--------|--------|
| 1     | 20.068    | 559152  | 26223  | 49.670 |
| 2     | 24.252    | 566571  | 22034  | 50.330 |
| Total |           | 1125722 | 48257  |        |

Peak# : 1  
 Retention Time : 20.062 min  
 Compound Name :  
 Spectrum Operation : None

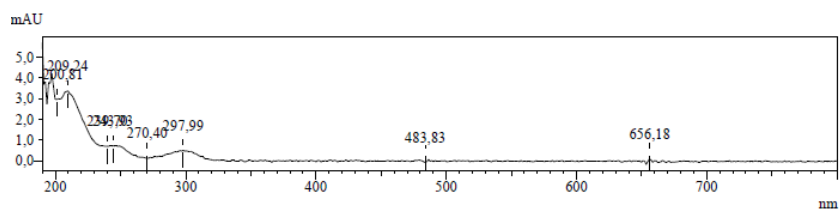

Peak# : 2  
 Retention Time : 24.215 min  
 Compound Name :  
 Spectrum Operation : None

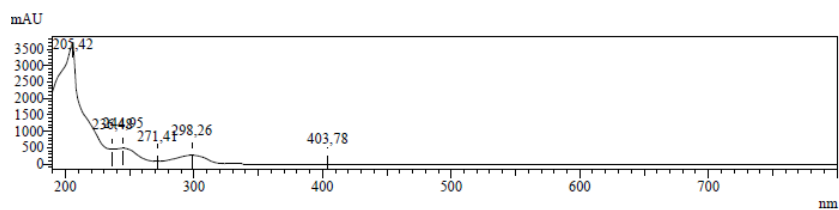

**Figure S82.** HPLC and UV spectra of (*S*)-4-Ethyl-7-methoxy-1,2,3,4-tetrahydroquinoline (**5i**)



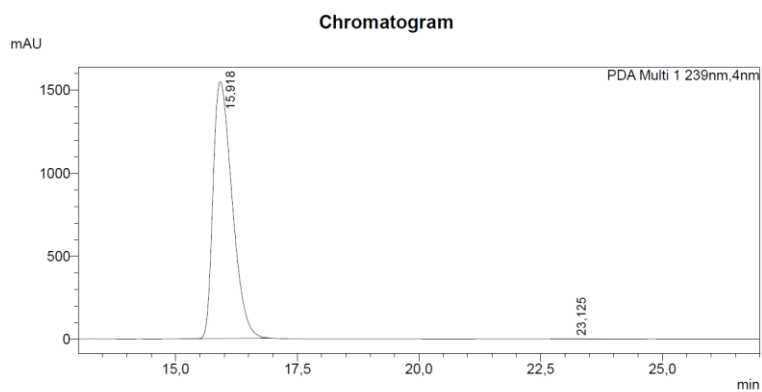

**Peak Table**

| PDA Ch1 239nm |           |                 |                |        |
|---------------|-----------|-----------------|----------------|--------|
| Peak#         | Ret. Time | Area            | Height         | Conc.  |
| 1             | 15,918    | 42283955        | 1546021        | 99,987 |
| 2             | 23,125    | 5572            | 136            | 0,013  |
| <b>Total</b>  |           | <b>42289527</b> | <b>1546156</b> |        |

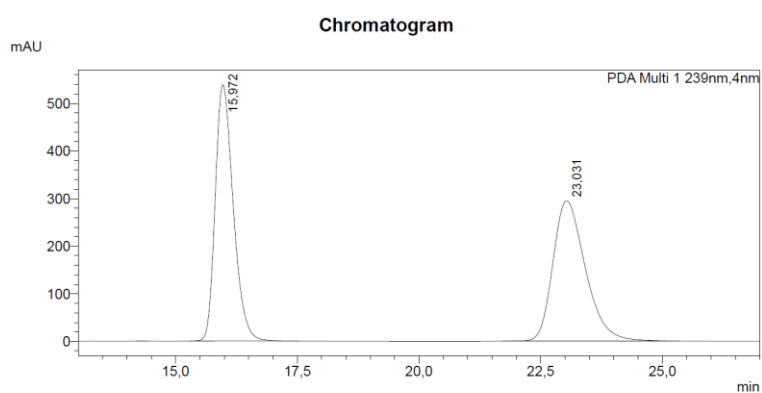

**Peak Table**

| PDA Ch1 239nm |           |                 |               |        |
|---------------|-----------|-----------------|---------------|--------|
| Peak#         | Ret. Time | Area            | Height        | Conc.  |
| 1             | 15,972    | 13842551        | 538365        | 50,472 |
| 2             | 23,031    | 13583622        | 294318        | 49,528 |
| <b>Total</b>  |           | <b>27426173</b> | <b>832683</b> |        |

Peak# : 1  
 Retention Time : 15,918 min  
 Compound Name :  
 Spectrum Operation : None

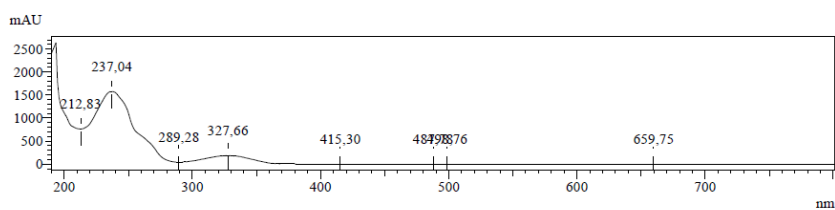

Peak# : 2  
 Retention Time : 23,125 min  
 Compound Name :  
 Spectrum Operation : None

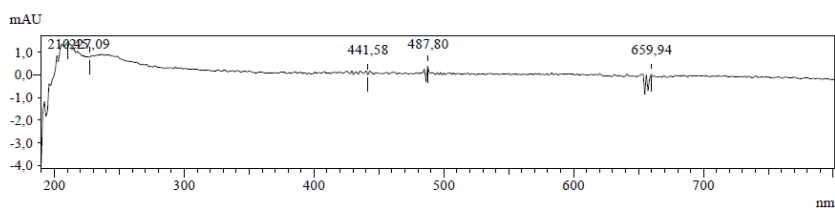

**Figure S83.** HPLC and UV spectra of *(S)*-4-Ethyl-7-vinyl-1,2,3,4-tetrahydroquinoline (**5j**)

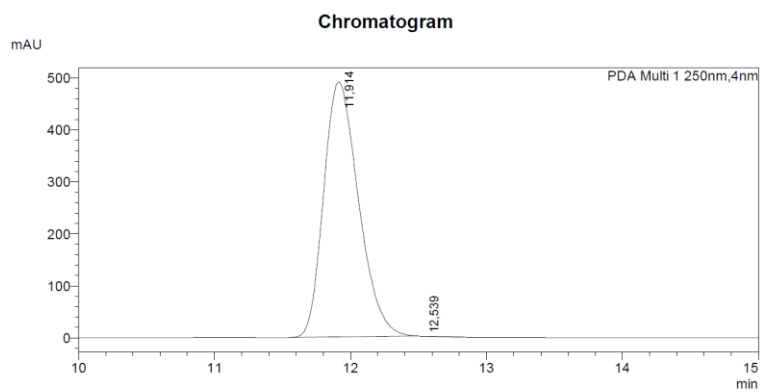

**Peak Table**

| PDA Ch1 250nm |           |         |        |        |
|---------------|-----------|---------|--------|--------|
| Peak#         | Ret. Time | Area    | Height | Conc.  |
| 1             | 11,914    | 8755398 | 490739 | 99,999 |
| 2             | 12,539    | 90      | 32     | 0,001  |
| Total         |           | 8755488 | 490772 |        |

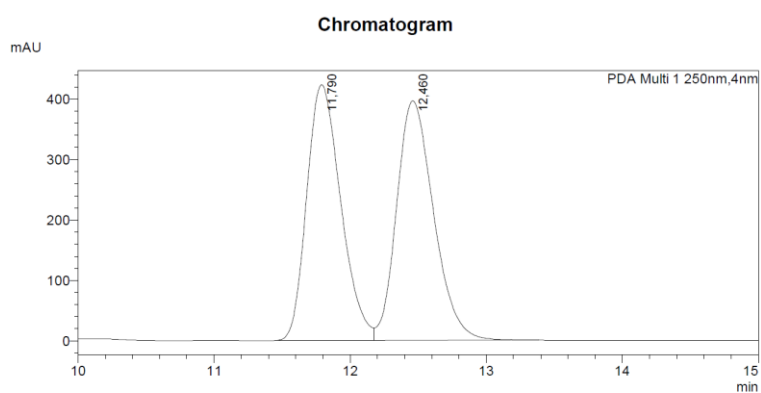

**Peak Table**

| PDA Ch1 250nm |           |          |        |        |
|---------------|-----------|----------|--------|--------|
| Peak#         | Ret. Time | Area     | Height | Conc.  |
| 1             | 11,790    | 7357462  | 422825 | 49,538 |
| 2             | 12,460    | 7494707  | 396461 | 50,462 |
| Total         |           | 14852168 | 819286 |        |

Peak# : 1  
 Retention Time : 11,914 min  
 Compound Name :  
 Spectrum Operation : None

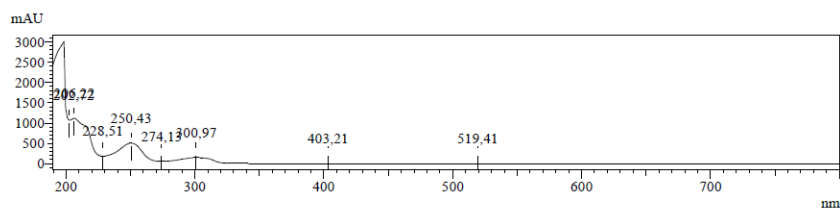

Peak# : 2  
 Retention Time : 12,613 min  
 Compound Name :  
 Spectrum Operation : None

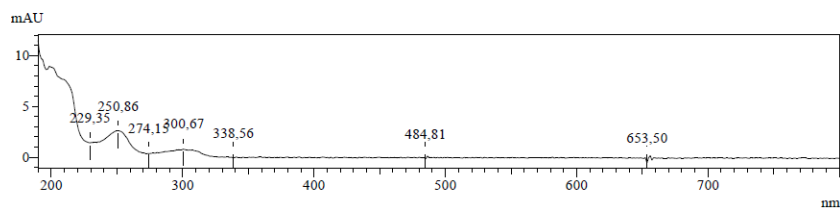

**Figure S84.** HPLC and UV spectra of (*S*)-5-Chloro-4-ethyl-1,2,3,4-tetrahydroquinoline (**5k**)

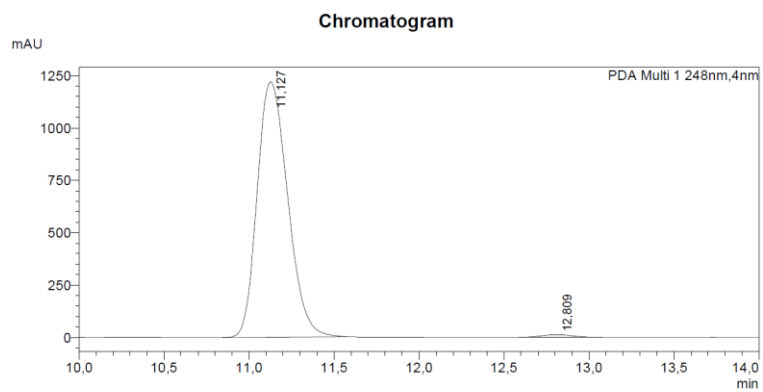

**Peak Table**

| PDA Ch1 248nm |           |                 |                |        |
|---------------|-----------|-----------------|----------------|--------|
| Peak#         | Ret. Time | Area            | Height         | Conc.  |
| 1             | 11.127    | 15238899        | 1220681        | 99.040 |
| 2             | 12.809    | 147678          | 11860          | 0.960  |
| <b>Total</b>  |           | <b>15386577</b> | <b>1232542</b> |        |

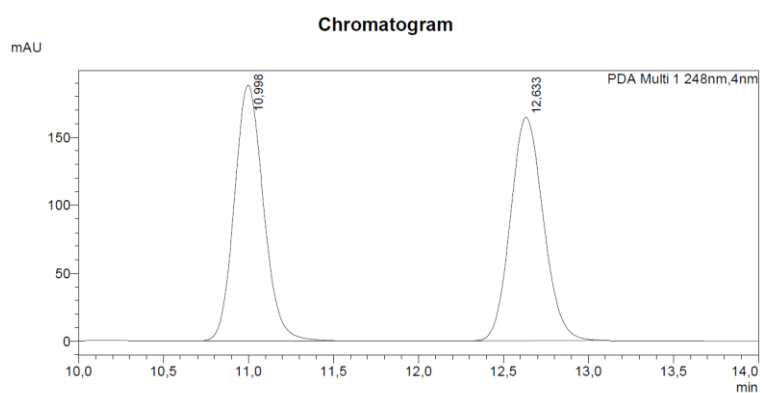

**Peak Table**

| PDA Ch1 248nm |           |                |               |        |
|---------------|-----------|----------------|---------------|--------|
| Peak#         | Ret. Time | Area           | Height        | Conc.  |
| 1             | 10.998    | 2235054        | 188254        | 50.207 |
| 2             | 12.633    | 2216662        | 164480        | 49.793 |
| <b>Total</b>  |           | <b>4451716</b> | <b>352734</b> |        |

Peak# : 1  
 Retention Time : 11.127 min  
 Compound Name :  
 Spectrum Operation : None

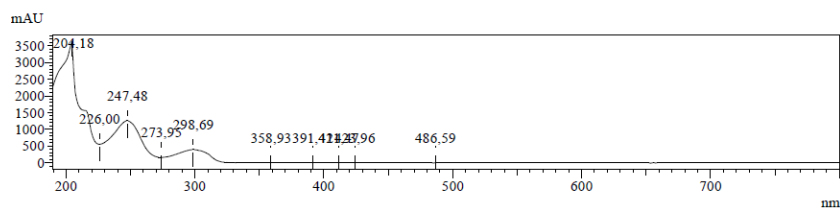

Peak# : 2  
 Retention Time : 12.809 min  
 Compound Name :  
 Spectrum Operation : None

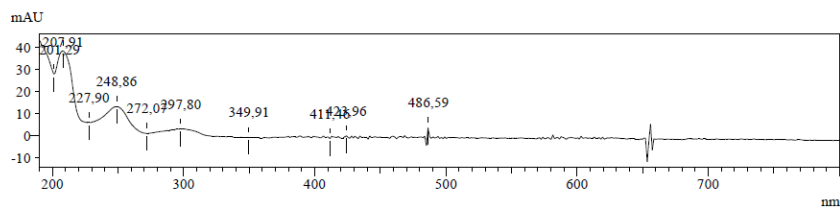

**Figure S85.** HPLC and UV spectra of (*S*)-4-Ethyl-5-methyl-1,2,3,4-tetrahydroquinoline (**51**)

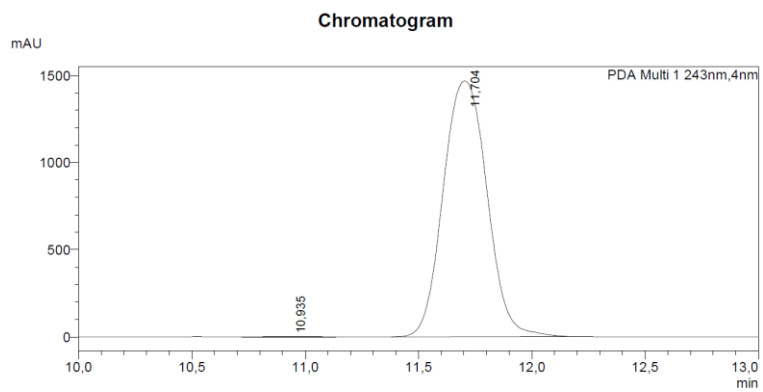

**Peak Table**

| PDA Ch1 243nm |           |                 |                |        |
|---------------|-----------|-----------------|----------------|--------|
| Peak#         | Ret. Time | Area            | Height         | Conc.  |
| 1             | 10,935    | 22323           | 2117           | 0,113  |
| 2             | 11,704    | 19763030        | 1467830        | 99,887 |
| <b>Total</b>  |           | <b>19785353</b> | <b>1469946</b> |        |

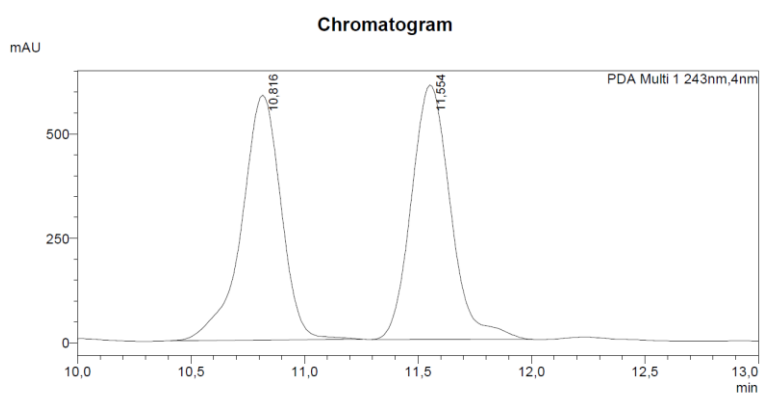

**Peak Table**

| PDA Ch1 243nm |           |                 |                |        |
|---------------|-----------|-----------------|----------------|--------|
| Peak#         | Ret. Time | Area            | Height         | Conc.  |
| 1             | 10,816    | 7077740         | 586689         | 49,113 |
| 2             | 11,554    | 7333525         | 609431         | 50,887 |
| <b>Total</b>  |           | <b>14411265</b> | <b>1196121</b> |        |

Peak# : 15  
 Retention Time : 10,932 min  
 Compound Name :  
 Spectrum Operation : None

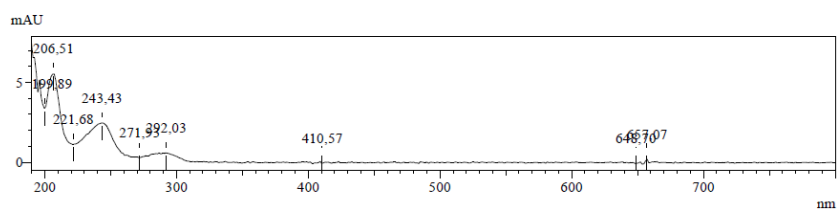

Peak# : 17  
 Retention Time : 11,704 min  
 Compound Name :  
 Spectrum Operation : None

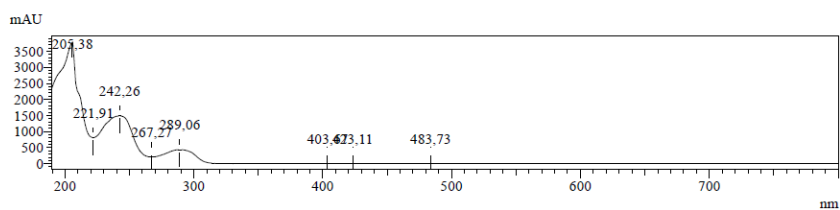

**Figure S86.** HPLC and UV spectra of (*S*)-4-Ethyl-8-fluoro-1,2,3,4-tetrahydroquinoline (**5m**)

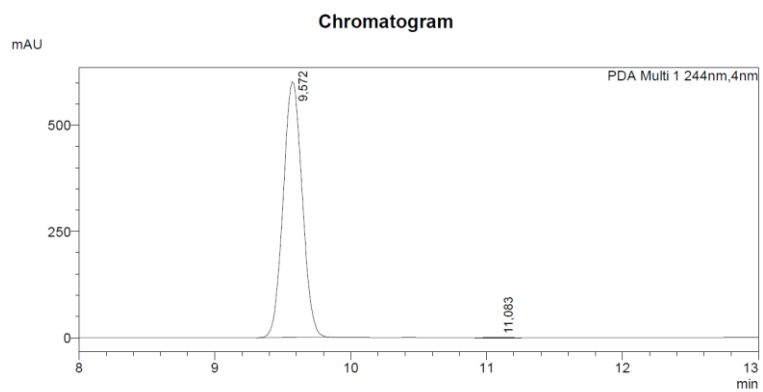

**Peak Table**

| PDA Ch1 244nm |           |         |        |        |
|---------------|-----------|---------|--------|--------|
| Peak#         | Ret. Time | Area    | Height | Conc.  |
| 1             | 9.572     | 5844967 | 601893 | 99.903 |
| 2             | 11.083    | 5669    | 574    | 0.097  |
| <b>Total</b>  |           | 5850636 | 602467 |        |

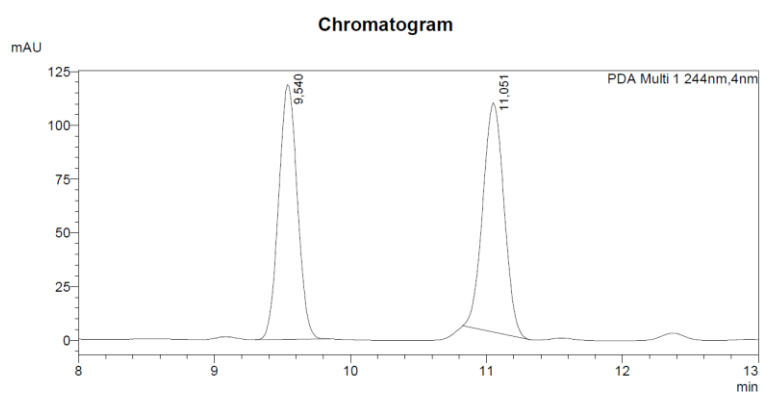

**Peak Table**

| PDA Ch1 244nm |           |         |        |        |
|---------------|-----------|---------|--------|--------|
| Peak#         | Ret. Time | Area    | Height | Conc.  |
| 1             | 9.540     | 1132750 | 118320 | 49.558 |
| 2             | 11.051    | 1152938 | 106443 | 50.442 |
| <b>Total</b>  |           | 2285688 | 224762 |        |

Peak# : 1  
 Retention Time : 9.572 min  
 Compound Name :  
 Spectrum Operation : None

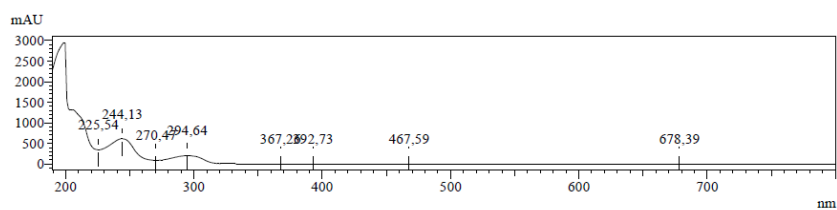

Peak# : 2  
 Retention Time : 11.082 min  
 Compound Name :  
 Spectrum Operation : None

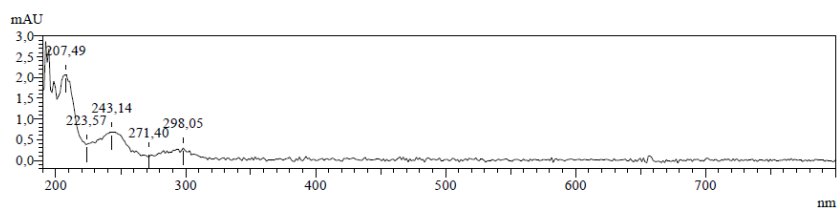

**Figure S87.** HPLC and UV spectra of (*S*)-4-Ethyl-8-methyl-1,2,3,4-tetrahydroquinoline (**5n**)

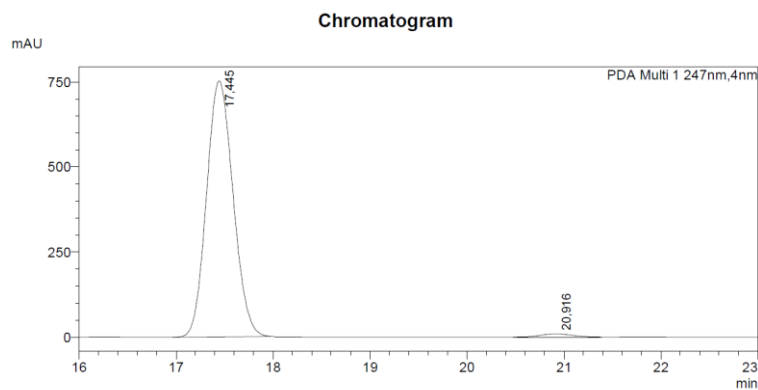

**Peak Table**

| PDA Ch1 247nm |           |                 |               |        |
|---------------|-----------|-----------------|---------------|--------|
| Peak#         | Ret. Time | Area            | Height        | Conc.  |
| 1             | 17.445    | 14294269        | 751503        | 98.539 |
| 2             | 20.916    | 211995          | 9605          | 1.461  |
| <b>Total</b>  |           | <b>14506264</b> | <b>761108</b> |        |

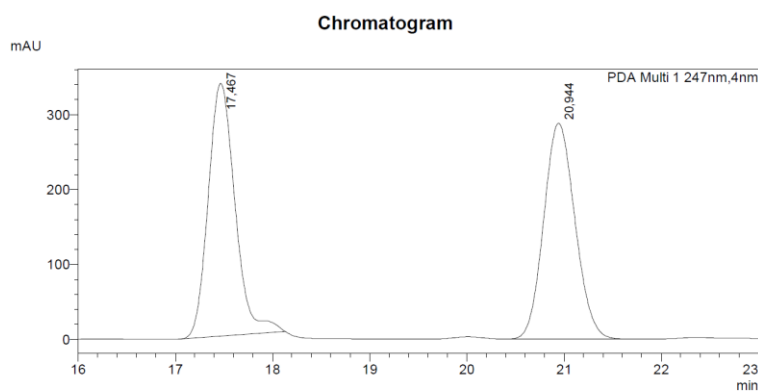

**Peak Table**

| PDA Ch1 247nm |           |                 |               |        |
|---------------|-----------|-----------------|---------------|--------|
| Peak#         | Ret. Time | Area            | Height        | Conc.  |
| 1             | 17.467    | 6492333         | 337203        | 50.233 |
| 2             | 20.944    | 6432143         | 287761        | 49.767 |
| <b>Total</b>  |           | <b>12924476</b> | <b>624964</b> |        |

Peak# : 1  
 Retention Time : 17.445 min  
 Compound Name :  
 Spectrum Operation : None

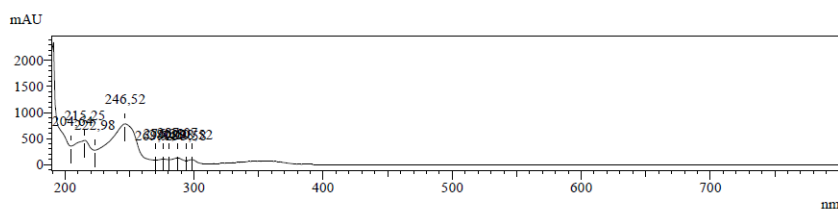

Peak# : 2  
 Retention Time : 20.917 min  
 Compound Name :  
 Spectrum Operation : None

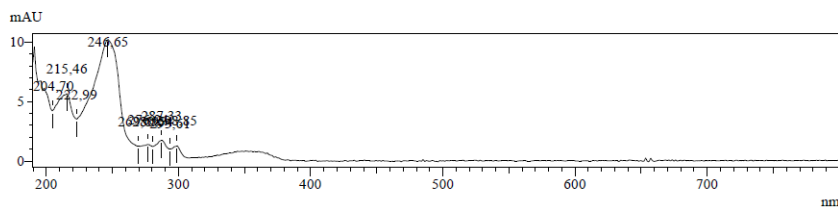

**Figure S88.** HPLC and UV spectra of (*S*)-4-Ethyl-1,2,3,4-tetrahydrobenzo[*g*]quinoline (**50**)

**Chromatogram**

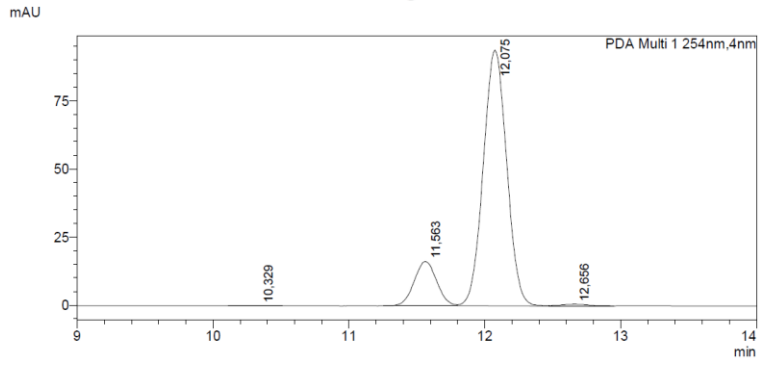

**Peak Table**

| PDA Ch1 254nm |           |                |               |        |
|---------------|-----------|----------------|---------------|--------|
| Peak#         | Ret. Time | Area           | Height        | Conc.  |
| 1             | 10.329    | 1372           | 113           | 0.104  |
| 2             | 11.563    | 187350         | 16278         | 14.162 |
| 3             | 12.075    | 1126806        | 93819         | 85.175 |
| 4             | 12.656    | 7410           | 567           | 0.560  |
| <b>Total</b>  |           | <b>1322938</b> | <b>110777</b> |        |

**Chromatogram**

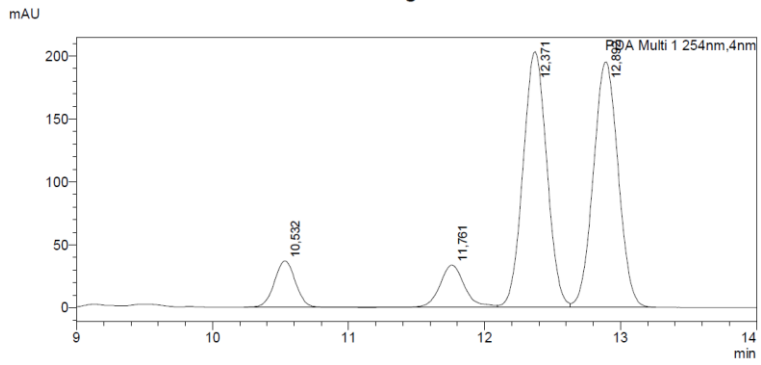

**Peak Table**

| PDA Ch1 254nm |           |                |               |        |
|---------------|-----------|----------------|---------------|--------|
| Peak#         | Ret. Time | Area           | Height        | Conc.  |
| 1             | 10.532    | 390604         | 36904         | 6.779  |
| 2             | 11.761    | 422686         | 33562         | 7.336  |
| 3             | 12.371    | 2473178        | 203149        | 42.925 |
| 4             | 12.892    | 2475117        | 195140        | 42.959 |
| <b>Total</b>  |           | <b>5761585</b> | <b>468754</b> |        |

Peak# : 1  
Retention Time : 10,329 min  
Compound Name :  
Spectrum Operation : None

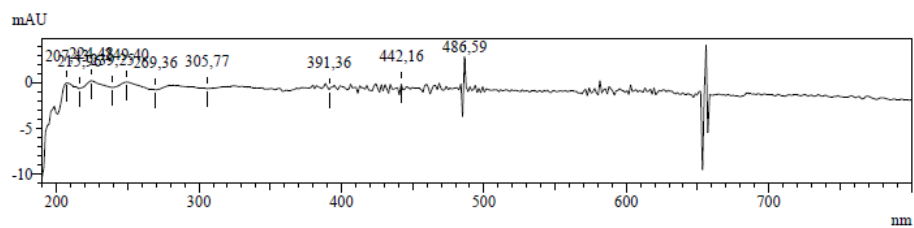

Peak# : 2  
Retention Time : 11,563 min  
Compound Name :  
Spectrum Operation : None

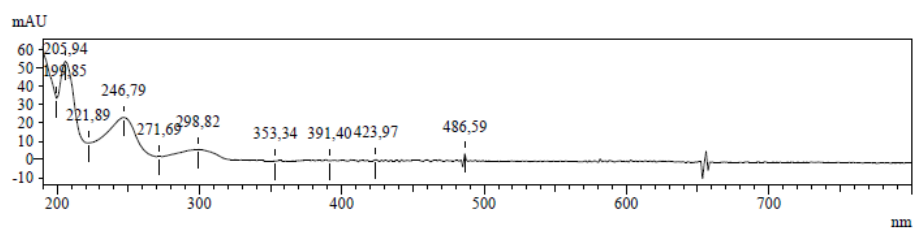

Peak# : 3  
Retention Time : 12,075 min  
Compound Name :  
Spectrum Operation : None

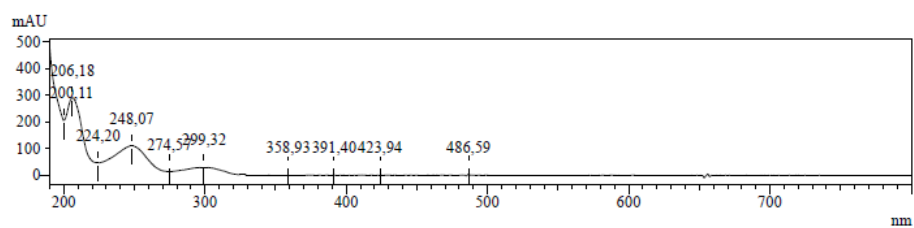

Peak# : 4  
Retention Time : 12,656 min  
Compound Name :  
Spectrum Operation : None

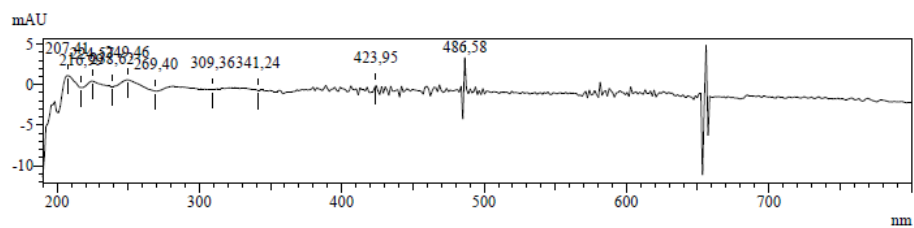

**Figure S89.** HPLC and UV spectra of (2*R*,4*S*)-4-Ethyl-2-methyl-1,2,3,4-tetrahydroquinoline (**5p**)



### Chromatogram

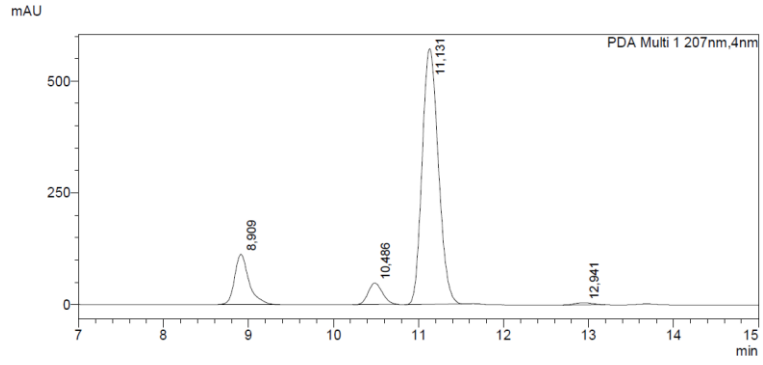

### Peak Table

| PDA Ch1 207nm |           |         |        |        |
|---------------|-----------|---------|--------|--------|
| Peak#         | Ret. Time | Area    | Height | Conc.  |
| 1             | 8,909     | 1310056 | 112350 | 13,734 |
| 2             | 10,486    | 564663  | 48023  | 5,920  |
| 3             | 11,131    | 7598115 | 571325 | 79,657 |
| 4             | 12,941    | 65740   | 4893   | 0,689  |
| Total         |           | 9538574 | 736592 |        |

### Chromatogram

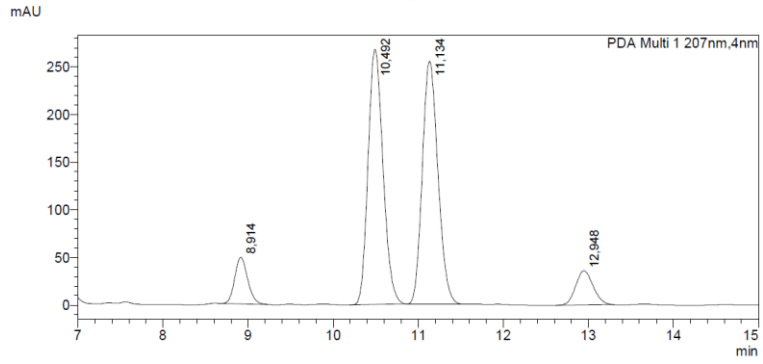

### Peak Table

| PDA Ch1 207nm |           |         |        |        |
|---------------|-----------|---------|--------|--------|
| Peak#         | Ret. Time | Area    | Height | Conc.  |
| 1             | 8,914     | 514587  | 48804  | 6,811  |
| 2             | 10,492    | 3271041 | 267440 | 43,294 |
| 3             | 11,134    | 3255741 | 254849 | 43,091 |
| 4             | 12,948    | 514121  | 35937  | 6,805  |
| Total         |           | 7555490 | 607031 |        |

Peak# : 1  
Retention Time : 8,909 min  
Compound Name :  
Spectrum Operation : None

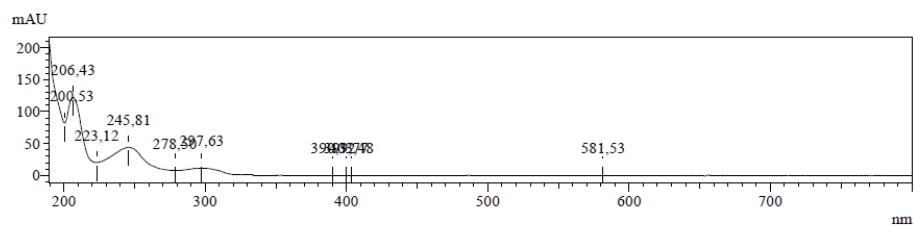

Peak# : 2  
Retention Time : 10,486 min  
Compound Name :  
Spectrum Operation : None

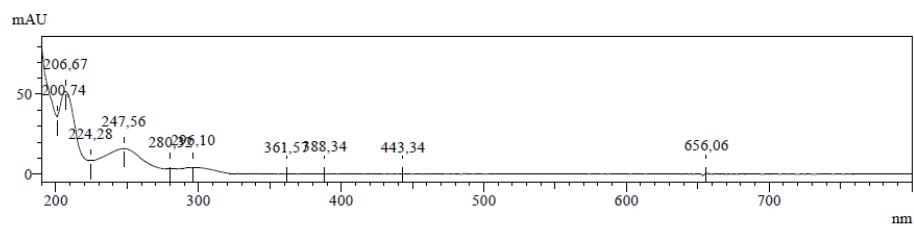

Peak# : 3  
Retention Time : 11,131 min  
Compound Name :  
Spectrum Operation : None

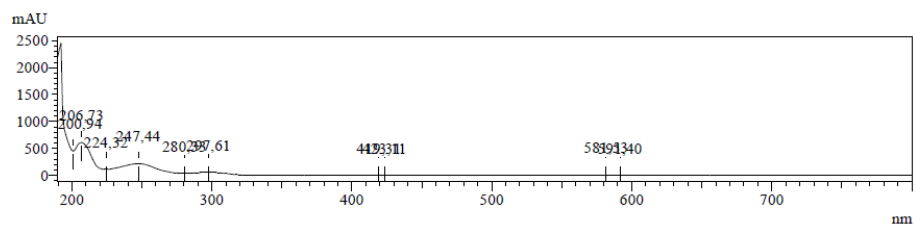

Peak# : 4  
Retention Time : 12,945 min  
Compound Name :  
Spectrum Operation : None

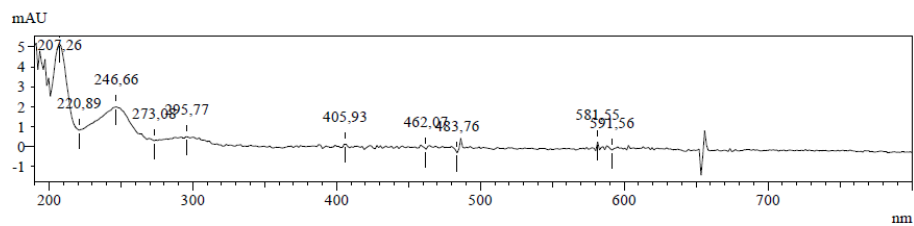

Figure S90. HPLC and UV spectra of (2*S*,4*S*)-4-ethyl-2-phenyl-1,2,3,4-tetrahydroquinoline (**5q**)

## 12. Cartesian coordinates

### 1a

|   |           |           |           |
|---|-----------|-----------|-----------|
| C | 2.397159  | -0.714056 | -0.000000 |
| C | 1.206261  | -1.402185 | -0.000000 |
| C | -0.029944 | -0.706194 | -0.000000 |
| C | -0.014619 | 0.721539  | 0.000000  |
| C | 1.227478  | 1.404892  | 0.000000  |
| C | 2.409716  | 0.701711  | -0.000000 |
| H | 3.346520  | -1.261799 | -0.000001 |
| H | 1.171169  | -2.497390 | -0.000001 |
| C | -1.263859 | 1.389338  | 0.000000  |
| H | 1.225213  | 2.502122  | 0.000000  |
| H | 3.366985  | 1.235015  | -0.000000 |
| C | -2.421719 | 0.651247  | 0.000000  |
| C | -2.320994 | -0.762076 | 0.000000  |
| H | -1.285869 | 2.486493  | 0.000001  |
| H | -3.406324 | 1.130259  | 0.000001  |
| H | -3.243645 | -1.363141 | 0.000000  |
| N | -1.187275 | -1.419551 | -0.000000 |

### BF<sub>3</sub>

|   |           |           |           |
|---|-----------|-----------|-----------|
| B | 0.000257  | 0.000487  | -0.001301 |
| F | 1.253539  | 0.370729  | 0.000241  |
| F | -0.948350 | 0.898888  | 0.000241  |
| F | -0.305332 | -1.269887 | 0.000241  |

**1a·BF<sub>3</sub>**

|   |           |           |           |
|---|-----------|-----------|-----------|
| C | -1.968237 | -2.040057 | -0.000526 |
| C | -0.696620 | -1.511858 | -0.001214 |
| C | -0.519610 | -0.108328 | -0.000901 |
| C | -1.668866 | 0.735216  | 0.000120  |
| C | -2.961901 | 0.155312  | 0.000749  |
| C | -3.110928 | -1.209980 | 0.000438  |
| H | -2.093294 | -3.128338 | -0.000960 |
| H | 0.172212  | -2.171522 | -0.002866 |
| C | -1.481808 | 2.136403  | 0.000393  |
| H | -3.832626 | 0.821077  | 0.001430  |
| H | -4.110040 | -1.657995 | 0.000818  |
| C | -0.211488 | 2.659655  | -0.000460 |
| C | 0.875886  | 1.775481  | -0.001493 |
| H | -2.362121 | 2.789929  | 0.001286  |
| H | -0.028464 | 3.737211  | -0.000291 |
| N | 0.735606  | 0.458699  | -0.001601 |
| B | 2.092769  | -0.479098 | 0.000476  |
| F | 2.045389  | -1.233838 | 1.146460  |
| F | 2.039541  | -1.249093 | -1.135088 |
| F | 3.159143  | 0.383047  | -0.008162 |
| H | 1.906023  | 2.142137  | -0.002128 |

**L1-CuBr**

|   |           |           |           |
|---|-----------|-----------|-----------|
| C | -3.067425 | -1.264577 | -0.795234 |
| C | -0.759306 | -2.702564 | -1.133429 |

|    |           |           |           |
|----|-----------|-----------|-----------|
| C  | -3.185221 | -2.781709 | -1.024005 |
| H  | -3.345186 | -0.749519 | -1.737825 |
| C  | -1.995577 | -3.215932 | -1.864499 |
| H  | -0.676796 | -3.250198 | -0.171153 |
| H  | -3.160395 | -3.299623 | -0.042973 |
| H  | -4.157364 | -3.026928 | -1.492073 |
| H  | -1.953970 | -4.313069 | -2.007476 |
| H  | -2.077363 | -2.760984 | -2.872414 |
| C  | 2.880539  | 1.902988  | -0.613361 |
| C  | 0.457337  | 3.110975  | -0.202430 |
| C  | 2.836763  | 3.440495  | -0.574669 |
| H  | 3.068762  | 1.584617  | -1.661347 |
| C  | 1.460769  | 3.904067  | -1.030292 |
| H  | 0.593220  | 3.392952  | 0.862483  |
| H  | 3.002499  | 3.780640  | 0.467363  |
| H  | 3.643808  | 3.880576  | -1.189110 |
| H  | 1.324800  | 4.994691  | -0.897196 |
| H  | 1.333379  | 3.695757  | -2.111555 |
| P  | 1.105248  | 1.351141  | -0.272609 |
| P  | -1.221018 | -0.960483 | -0.574999 |
| Cu | 0.240005  | -0.260775 | 1.095818  |
| Br | 0.705847  | -1.576424 | 2.959409  |
| C  | -1.004720 | 3.183463  | -0.528872 |
| C  | -1.928274 | 2.679010  | 0.400216  |
| C  | -1.486044 | 3.682607  | -1.743301 |
| C  | -3.289521 | 2.651154  | 0.115868  |
| H  | -1.565654 | 2.293681  | 1.364439  |
| C  | -2.852621 | 3.654739  | -2.031784 |
| H  | -0.791353 | 4.099033  | -2.482565 |

|   |           |           |           |
|---|-----------|-----------|-----------|
| C | -3.756874 | 3.132487  | -1.109393 |
| H | -3.994114 | 2.248034  | 0.853438  |
| H | -3.210800 | 4.048922  | -2.990087 |
| H | -4.829317 | 3.106619  | -1.337271 |
| C | 3.927376  | 1.261702  | 0.267877  |
| C | 3.793068  | -0.061799 | 0.706760  |
| C | 5.084885  | 1.958830  | 0.639607  |
| C | 4.768117  | -0.668024 | 1.495117  |
| H | 2.893878  | -0.633658 | 0.443051  |
| C | 6.068098  | 1.354250  | 1.422830  |
| H | 5.234243  | 2.993641  | 0.310552  |
| C | 5.913832  | 0.039071  | 1.857516  |
| H | 4.619309  | -1.700241 | 1.835488  |
| H | 6.963673  | 1.923198  | 1.699211  |
| H | 6.682443  | -0.432229 | 2.480828  |
| C | -3.949223 | -0.755584 | 0.311457  |
| C | -5.195898 | -0.199851 | 0.003015  |
| C | -3.584523 | -0.874016 | 1.658928  |
| C | -6.055744 | 0.237274  | 1.009722  |
| H | -5.492693 | -0.101406 | -1.050230 |
| C | -4.439034 | -0.433050 | 2.667915  |
| H | -2.606448 | -1.300614 | 1.925382  |
| C | -5.677241 | 0.125462  | 2.347232  |
| H | -7.026934 | 0.672900  | 0.746595  |
| H | -4.132647 | -0.526011 | 3.716337  |
| H | -6.347725 | 0.472926  | 3.141787  |
| C | 0.575070  | -2.748462 | -1.816008 |
| C | 0.710557  | -2.761308 | -3.209192 |
| C | 1.740519  | -2.724331 | -1.033911 |

|   |           |           |           |
|---|-----------|-----------|-----------|
| C | 1.972972  | -2.732063 | -3.803932 |
| H | -0.178386 | -2.799750 | -3.850112 |
| C | 3.000919  | -2.694232 | -1.625978 |
| H | 1.647659  | -2.728550 | 0.063149  |
| C | 3.122189  | -2.692454 | -3.016742 |
| H | 2.055968  | -2.744461 | -4.897043 |
| H | 3.898254  | -2.677536 | -0.995484 |
| H | 4.112933  | -2.671567 | -3.484885 |
| C | 0.582340  | 0.739222  | -1.959124 |
| H | 0.689618  | 1.547944  | -2.709619 |
| H | 1.335797  | -0.032589 | -2.220822 |
| C | -0.822560 | 0.141794  | -2.019357 |
| H | -0.970918 | -0.394460 | -2.977990 |
| H | -1.583695 | 0.946896  | -1.986090 |

**IIa-proR<sub>3,4</sub>**

|   |           |           |           |
|---|-----------|-----------|-----------|
| C | -3.749576 | 1.480906  | -0.386426 |
| C | -4.241072 | -0.192039 | 1.709189  |
| C | -5.197256 | 1.019228  | -0.204584 |
| H | -3.278605 | 0.756394  | -1.078028 |
| C | -5.101208 | -0.349665 | 0.454455  |
| H | -4.876484 | 0.271147  | 2.493340  |
| H | -5.755788 | 1.722587  | 0.447941  |
| H | -5.729881 | 0.984607  | -1.174201 |
| H | -6.094057 | -0.779048 | 0.692575  |
| H | -4.614474 | -1.042736 | -0.262097 |
| C | 0.697834  | -2.199081 | 1.421722  |
| C | 0.025830  | -3.154808 | -1.071093 |

|    |           |           |           |
|----|-----------|-----------|-----------|
| C  | 0.907973  | -3.694595 | 1.140774  |
| H  | -0.246160 | -2.096531 | 1.996519  |
| C  | -0.135637 | -4.106710 | 0.112343  |
| H  | 0.992790  | -3.374454 | -1.568634 |
| H  | 1.924323  | -3.867596 | 0.731932  |
| H  | 0.831099  | -4.274936 | 2.079820  |
| H  | -0.024051 | -5.160725 | -0.206060 |
| H  | -1.141736 | -4.006437 | 0.568380  |
| P  | 0.321555  | -1.476069 | -0.272308 |
| P  | -2.997324 | 1.224874  | 1.331217  |
| Cu | 1.983879  | -0.394065 | -1.373658 |
| C  | 2.819187  | 2.388853  | 0.184252  |
| C  | 0.872965  | 2.310353  | -1.122378 |
| C  | 3.472707  | 2.727000  | 1.387835  |
| C  | 3.568901  | 1.772715  | -0.860171 |
| C  | 1.533225  | 1.644227  | -2.178701 |
| H  | -0.187172 | 2.580467  | -1.213392 |
| C  | 4.819909  | 2.469208  | 1.532682  |
| H  | 2.912255  | 3.187755  | 2.202340  |
| C  | 4.946516  | 1.519402  | -0.677968 |
| C  | 2.904108  | 1.411318  | -2.072653 |
| H  | 0.985585  | 1.451218  | -3.107295 |
| C  | 5.566072  | 1.867085  | 0.500593  |
| H  | 5.314728  | 2.735456  | 2.473250  |
| H  | 5.498398  | 1.032363  | -1.489926 |
| H  | 3.494637  | 1.067891  | -2.929093 |
| H  | 6.634364  | 1.671773  | 0.640944  |
| N  | 1.477516  | 2.679821  | -0.010376 |
| B  | 0.603586  | 3.485849  | 1.142612  |



|    |           |           |           |
|----|-----------|-----------|-----------|
| F  | 0.603838  | 2.687809  | 2.260637  |
| F  | -0.654774 | 3.644347  | 0.620485  |
| F  | 1.240808  | 4.681580  | 1.347066  |
| Br | 3.595442  | -1.920635 | -2.199005 |
| C  | -3.633913 | -1.431958 | 2.305407  |
| C  | -3.835382 | -2.708988 | 1.765386  |
| C  | -2.827125 | -1.326942 | 3.450597  |
| C  | -3.227619 | -3.833649 | 2.327746  |
| H  | -4.481179 | -2.839469 | 0.888652  |
| C  | -2.213561 | -2.444888 | 4.010009  |
| H  | -2.673699 | -0.339448 | 3.909066  |
| C  | -2.404498 | -3.707548 | 3.444658  |
| H  | -3.403922 | -4.821083 | 1.883165  |
| H  | -1.582839 | -2.330291 | 4.899975  |
| H  | -1.923229 | -4.589725 | 3.882451  |
| C  | -3.514169 | 2.857080  | -0.931073 |
| C  | -2.736722 | 3.030792  | -2.082528 |
| C  | -4.030350 | 3.997513  | -0.301442 |
| C  | -2.470767 | 4.303898  | -2.588326 |
| H  | -2.335014 | 2.144732  | -2.596266 |
| C  | -3.773657 | 5.269346  | -0.806299 |
| H  | -4.630494 | 3.887283  | 0.611611  |
| C  | -2.988763 | 5.428894  | -1.950133 |
| H  | -1.857579 | 4.415817  | -3.490646 |
| H  | -4.184425 | 6.149119  | -0.296972 |
| H  | -2.782800 | 6.431372  | -2.342729 |
| C  | 1.798608  | -1.492354 | 2.160400  |
| C  | 1.518778  | -0.765736 | 3.322947  |
| C  | 3.124357  | -1.537148 | 1.703404  |

|   |           |           |           |
|---|-----------|-----------|-----------|
| C | 2.532814  | -0.110902 | 4.022470  |
| H | 0.485830  | -0.719944 | 3.694388  |
| C | 4.139012  | -0.888893 | 2.403519  |
| H | 3.371136  | -2.081485 | 0.780990  |
| C | 3.847773  | -0.175638 | 3.567528  |
| H | 2.290094  | 0.450393  | 4.932201  |
| H | 5.169753  | -0.940362 | 2.032191  |
| H | 4.648275  | 0.333910  | 4.117174  |
| C | -1.052764 | -3.061426 | -2.109395 |
| C | -2.376440 | -3.443462 | -1.864201 |
| C | -0.747517 | -2.470388 | -3.345176 |
| C | -3.372107 | -3.215895 | -2.815629 |
| H | -2.645452 | -3.922058 | -0.914391 |
| C | -1.739602 | -2.240170 | -4.294424 |
| H | 0.292846  | -2.183703 | -3.556337 |
| C | -3.060638 | -2.605928 | -4.029273 |
| H | -4.403564 | -3.521278 | -2.602573 |
| H | -1.479570 | -1.774845 | -5.252398 |
| H | -3.844177 | -2.424372 | -4.773735 |
| C | -1.366512 | -0.758004 | -0.086535 |
| H | -2.061287 | -1.573609 | 0.195322  |
| H | -1.664494 | -0.408050 | -1.095604 |
| C | -1.389562 | 0.366545  | 0.930494  |
| H | -0.993702 | 0.028043  | 1.908507  |
| H | -0.717040 | 1.190996  | 0.631148  |

**IIa-proS<sub>3-4</sub>**

|   |           |          |          |
|---|-----------|----------|----------|
| C | -4.347354 | 1.412405 | 0.595102 |
|---|-----------|----------|----------|

|    |           |           |           |
|----|-----------|-----------|-----------|
| C  | -3.312983 | 3.603808  | -0.657721 |
| C  | -4.896885 | 2.782514  | 1.005620  |
| H  | -3.573301 | 1.144908  | 1.343925  |
| C  | -3.761314 | 3.768725  | 0.791023  |
| H  | -4.109683 | 4.031232  | -1.303512 |
| H  | -5.765139 | 3.052181  | 0.368403  |
| H  | -5.258641 | 2.764029  | 2.051452  |
| H  | -4.053079 | 4.813990  | 1.012588  |
| H  | -2.931073 | 3.511151  | 1.481889  |
| C  | -0.451375 | -0.655259 | 2.105647  |
| C  | -1.024376 | -2.974761 | 0.743732  |
| C  | -0.528642 | -1.959782 | 2.912492  |
| H  | -1.429359 | -0.140591 | 2.209184  |
| C  | -1.511403 | -2.867181 | 2.188637  |
| H  | -0.096510 | -3.582109 | 0.735816  |
| H  | 0.471229  | -2.438576 | 2.950418  |
| H  | -0.827369 | -1.749594 | 3.956413  |
| H  | -1.585263 | -3.868354 | 2.653706  |
| H  | -2.522417 | -2.414593 | 2.236994  |
| P  | -0.398257 | -1.243620 | 0.322494  |
| P  | -3.429860 | 1.740958  | -1.040257 |
| Cu | 1.648956  | -1.403173 | -0.659219 |
| C  | 4.080329  | -0.923981 | -1.816843 |
| C  | 4.018421  | 1.100470  | -0.629817 |
| C  | 2.780402  | -0.726181 | -2.343978 |
| C  | 2.687806  | 1.345224  | -1.069472 |
| C  | 2.059398  | 0.392239  | -1.932585 |
| H  | 1.088781  | 0.637233  | -2.381671 |
| N  | 4.662849  | -0.072891 | -1.001515 |

|   |           |           |           |
|---|-----------|-----------|-----------|
| B | 6.082770  | -0.517659 | -0.290881 |
| F | 6.404621  | -1.744972 | -0.805634 |
| F | 5.817623  | -0.563594 | 1.056952  |
| F | 7.020161  | 0.436605  | -0.606471 |
| C | 2.036419  | 2.534731  | -0.679345 |
| C | 2.690353  | 3.460442  | 0.104357  |
| H | 2.179978  | 4.383535  | 0.398925  |
| C | 4.674061  | 2.065073  | 0.159413  |
| C | 4.014400  | 3.223668  | 0.514426  |
| H | 4.533489  | 3.968626  | 1.127617  |
| H | 1.011410  | 2.722873  | -1.026402 |
| H | 5.703999  | 1.896940  | 0.477754  |
| H | 2.408032  | -1.410584 | -3.113908 |
| H | 4.649660  | -1.823647 | -2.066742 |
| C | -1.955800 | -3.497682 | -0.310473 |
| C | -1.410839 | -4.022291 | -1.491800 |
| C | -3.348621 | -3.405373 | -0.204933 |
| C | -2.231589 | -4.424000 | -2.542763 |
| H | -0.318649 | -4.111510 | -1.580032 |
| C | -4.172877 | -3.804672 | -1.257031 |
| H | -3.813642 | -3.006699 | 0.705220  |
| C | -3.618489 | -4.311280 | -2.431241 |
| H | -1.784705 | -4.831793 | -3.457047 |
| H | -5.261266 | -3.715242 | -1.151714 |
| H | -4.265989 | -4.623900 | -3.258494 |
| C | 0.639884  | 0.294627  | 2.507277  |
| C | 0.320894  | 1.554842  | 3.025127  |
| C | 1.992240  | -0.065465 | 2.405596  |
| C | 1.322936  | 2.429316  | 3.447943  |

|   |           |           |           |
|---|-----------|-----------|-----------|
| H | -0.734297 | 1.852232  | 3.107073  |
| C | 2.994358  | 0.807151  | 2.822549  |
| H | 2.275186  | -1.048025 | 1.997310  |
| C | 2.661379  | 2.055571  | 3.351416  |
| H | 1.051841  | 3.409486  | 3.857813  |
| H | 4.044319  | 0.505635  | 2.724657  |
| H | 3.451025  | 2.741433  | 3.680948  |
| C | -5.356220 | 0.301056  | 0.543936  |
| C | -5.351315 | -0.703974 | 1.519252  |
| C | -6.335198 | 0.247568  | -0.457442 |
| C | -6.292254 | -1.734125 | 1.497401  |
| H | -4.591794 | -0.675517 | 2.314378  |
| C | -7.277242 | -0.777924 | -0.483358 |
| H | -6.352638 | 1.021228  | -1.237210 |
| C | -7.258906 | -1.774846 | 0.493982  |
| H | -6.268196 | -2.510540 | 2.271538  |
| H | -8.033074 | -0.801574 | -1.277120 |
| H | -7.999679 | -2.582547 | 0.472713  |
| C | -2.015537 | 4.238708  | -1.070241 |
| C | -1.213500 | 4.957975  | -0.176569 |
| C | -1.595650 | 4.147444  | -2.407604 |
| C | -0.040036 | 5.579292  | -0.609712 |
| H | -1.515439 | 5.066107  | 0.871428  |
| C | -0.416059 | 4.748071  | -2.836639 |
| H | -2.217735 | 3.596102  | -3.126745 |
| C | 0.368343  | 5.472673  | -1.936629 |
| H | 0.555283  | 6.162801  | 0.103559  |
| H | -0.110751 | 4.660633  | -3.885972 |
| H | 1.293455  | 5.955678  | -2.272284 |

|    |           |           |           |
|----|-----------|-----------|-----------|
| C  | -1.863763 | -0.419746 | -0.430501 |
| H  | -2.028277 | -0.863804 | -1.432884 |
| H  | -2.741192 | -0.718889 | 0.179555  |
| C  | -1.751716 | 1.095869  | -0.528995 |
| H  | -1.011655 | 1.384049  | -1.301925 |
| H  | -1.420819 | 1.558520  | 0.425399  |
| Br | 2.721727  | -3.376286 | 0.089336  |

**EtMgBr·2Et<sub>2</sub>O**

|    |           |           |           |
|----|-----------|-----------|-----------|
| C  | 1.612756  | 0.643570  | 2.261893  |
| H  | 1.400422  | 0.002463  | 3.145844  |
| H  | 2.589630  | 0.272646  | 1.878413  |
| C  | 1.778851  | 2.101148  | 2.732178  |
| H  | 2.567851  | 2.251243  | 3.503045  |
| H  | 2.034729  | 2.777135  | 1.890987  |
| H  | 0.838143  | 2.496894  | 3.163560  |
| Mg | 0.116652  | 0.321632  | 0.755580  |
| Br | -2.240637 | 1.191963  | 0.472938  |
| O  | 1.015676  | 0.640204  | -1.103090 |
| O  | -0.182589 | -1.694263 | 0.262796  |
| C  | 2.290313  | 1.309435  | -1.196660 |
| H  | 2.276434  | 1.980121  | -2.072533 |
| H  | 2.364889  | 1.933881  | -0.293470 |
| C  | 0.390126  | 0.269401  | -2.348606 |
| H  | 1.165117  | -0.122300 | -3.030812 |
| H  | -0.285187 | -0.560899 | -2.092789 |
| C  | 3.443552  | 0.321446  | -1.265778 |
| H  | 3.356872  | -0.342922 | -2.143264 |

|   |           |           |           |
|---|-----------|-----------|-----------|
| H | 4.399588  | 0.868680  | -1.346216 |
| H | 3.474462  | -0.298698 | -0.353969 |
| C | -0.379572 | 1.423492  | -2.969563 |
| H | -0.860682 | 1.086603  | -3.905282 |
| H | -1.160751 | 1.771166  | -2.272873 |
| H | 0.284568  | 2.270440  | -3.215468 |
| C | 0.943485  | -2.517194 | -0.101960 |
| H | 0.590184  | -3.334271 | -0.754334 |
| H | 1.600414  | -1.869277 | -0.701609 |
| C | -1.439753 | -2.381403 | 0.444341  |
| H | -1.239201 | -3.374146 | 0.883324  |
| H | -2.002101 | -1.786851 | 1.179651  |
| C | 1.670156  | -3.044193 | 1.124680  |
| H | 1.012344  | -3.686762 | 1.735644  |
| H | 2.545218  | -3.643183 | 0.815529  |
| H | 2.018779  | -2.203617 | 1.749107  |
| C | -2.207723 | -2.479562 | -0.862620 |
| H | -2.446946 | -1.467671 | -1.230615 |
| H | -1.626638 | -3.015695 | -1.633618 |
| H | -3.153509 | -3.027635 | -0.703109 |

### **L1-CuEt**

|    |           |           |           |
|----|-----------|-----------|-----------|
| Cu | 0.021730  | -0.184070 | 1.529246  |
| C  | 0.273710  | -0.054244 | -1.847178 |
| H  | 0.868132  | 0.072295  | -2.773002 |
| H  | -0.468459 | -0.850058 | -2.060575 |
| C  | -0.433135 | 1.249928  | -1.481254 |
| H  | 0.301136  | 2.069686  | -1.342136 |

|   |           |           |           |
|---|-----------|-----------|-----------|
| H | -1.108320 | 1.568677  | -2.299296 |
| C | 2.957813  | 0.164587  | -0.865011 |
| C | 1.921454  | -2.381838 | -0.882734 |
| C | 3.537777  | -0.778716 | -1.933278 |
| H | 2.734053  | 1.152978  | -1.314513 |
| C | 3.343990  | -2.208929 | -1.443257 |
| H | 1.965413  | -2.914387 | 0.086565  |
| H | 3.005884  | -0.621959 | -2.892639 |
| H | 4.605054  | -0.552780 | -2.125399 |
| H | 3.562745  | -2.950355 | -2.234404 |
| H | 4.067613  | -2.404796 | -0.628725 |
| C | -2.927212 | 0.206392  | -0.487532 |
| C | -2.213469 | 2.729246  | 0.416056  |
| C | -3.798945 | 1.365292  | -0.969339 |
| H | -2.618438 | -0.427926 | -1.344131 |
| C | -3.687324 | 2.505627  | 0.039030  |
| H | -2.129152 | 2.895645  | 1.505596  |
| H | -3.430432 | 1.697773  | -1.959182 |
| H | -4.849249 | 1.056370  | -1.130348 |
| H | -4.151816 | 3.436384  | -0.337402 |
| H | -4.243365 | 2.234609  | 0.956282  |
| P | 1.321690  | -0.636956 | -0.416911 |
| P | -1.357014 | 1.055489  | 0.130482  |
| C | -3.510439 | -0.707482 | 0.565755  |
| C | -2.723839 | -1.769481 | 1.038352  |
| C | -4.804335 | -0.574517 | 1.077907  |
| C | -3.210462 | -2.672108 | 1.977244  |
| H | -1.699051 | -1.887757 | 0.654733  |
| C | -5.295698 | -1.472785 | 2.029211  |



|   |           |           |           |
|---|-----------|-----------|-----------|
| H | -5.457845 | 0.235307  | 0.733616  |
| C | -4.504702 | -2.525059 | 2.480937  |
| H | -2.572651 | -3.495223 | 2.322228  |
| H | -6.313358 | -1.344225 | 2.416282  |
| H | -4.892290 | -3.229789 | 3.225535  |
| C | -1.473371 | 3.841918  | -0.271542 |
| C | -0.317246 | 4.357025  | 0.333148  |
| C | -1.847126 | 4.346916  | -1.522160 |
| C | 0.449922  | 5.333812  | -0.296000 |
| H | -0.013400 | 3.973620  | 1.317317  |
| C | -1.083197 | 5.329296  | -2.153005 |
| H | -2.747567 | 3.969921  | -2.023106 |
| C | 0.070064  | 5.823722  | -1.546387 |
| H | 1.350066  | 5.719862  | 0.196508  |
| H | -1.395323 | 5.711135  | -3.132233 |
| H | 0.669926  | 6.594117  | -2.044348 |
| C | 0.891952  | -3.068224 | -1.731401 |
| C | -0.232299 | -3.625601 | -1.104529 |
| C | 0.948825  | -3.086698 | -3.129507 |
| C | -1.284094 | -4.154244 | -1.848802 |
| H | -0.279122 | -3.637313 | -0.005612 |
| C | -0.096416 | -3.628445 | -3.877938 |
| H | 1.815474  | -2.659900 | -3.650516 |
| C | -1.221190 | -4.154161 | -3.243068 |
| H | -2.157145 | -4.573900 | -1.334422 |
| H | -0.032553 | -3.632871 | -4.972443 |
| H | -2.044863 | -4.571109 | -3.833735 |
| C | 3.898630  | 0.368761  | 0.301398  |
| C | 5.022254  | 1.187665  | 0.116580  |

|   |           |           |           |
|---|-----------|-----------|-----------|
| C | 3.723645  | -0.238465 | 1.549467  |
| C | 5.941128  | 1.391849  | 1.142285  |
| H | 5.172079  | 1.678467  | -0.854987 |
| C | 4.642370  | -0.037177 | 2.580891  |
| H | 2.836464  | -0.857947 | 1.739947  |
| C | 5.754712  | 0.776757  | 2.381649  |
| H | 6.808632  | 2.041218  | 0.975221  |
| H | 4.477504  | -0.520959 | 3.551200  |
| H | 6.475034  | 0.937797  | 3.192064  |
| C | 0.314200  | -0.949651 | 3.332049  |
| H | -0.600054 | -0.880090 | 3.961987  |
| H | 1.090935  | -0.370656 | 3.882359  |
| C | 0.751039  | -2.411350 | 3.251595  |
| H | 0.906357  | -2.907884 | 4.238928  |
| H | 0.010270  | -3.038988 | 2.709516  |
| H | 1.707449  | -2.532665 | 2.697754  |

### **II-*proR*<sub>1-2</sub>**

|   |           |           |           |
|---|-----------|-----------|-----------|
| C | -3.717465 | -0.604320 | -0.810611 |
| C | -3.757500 | 2.085387  | -1.279554 |
| C | -5.084677 | 0.094063  | -0.845520 |
| H | -3.447777 | -0.740691 | 0.258334  |
| C | -4.853618 | 1.521919  | -0.381614 |
| H | -4.182743 | 2.210799  | -2.296979 |
| H | -5.475989 | 0.087783  | -1.884731 |
| H | -5.820465 | -0.449471 | -0.221053 |
| H | -5.771494 | 2.141231  | -0.419884 |
| H | -4.522665 | 1.499698  | 0.676950  |

|    |           |           |           |
|----|-----------|-----------|-----------|
| C  | 2.544338  | 2.438103  | 0.570629  |
| C  | 1.133749  | 1.103624  | 2.526290  |
| C  | 3.186571  | 2.357653  | 1.959236  |
| H  | 1.983874  | 3.393363  | 0.501619  |
| C  | 2.039812  | 2.265060  | 2.954120  |
| H  | 1.619287  | 0.152358  | 2.822084  |
| H  | 3.823526  | 1.453026  | 2.030861  |
| H  | 3.836696  | 3.232994  | 2.144780  |
| H  | 2.390769  | 2.121508  | 3.993320  |
| H  | 1.479402  | 3.219908  | 2.932842  |
| P  | 1.253060  | 1.083797  | 0.633969  |
| P  | -2.492709 | 0.673645  | -1.503607 |
| Cu | 1.690175  | -0.624261 | -0.834835 |
| C  | 1.118905  | -2.973746 | 1.214988  |
| C  | 1.788010  | -2.652109 | -1.067904 |
| C  | 1.425916  | -3.018140 | 2.587442  |
| C  | -0.181888 | -3.350451 | 0.787843  |
| C  | 0.491937  | -3.054733 | -1.517606 |
| H  | 2.647008  | -2.703720 | -1.744998 |
| C  | 0.471853  | -3.438898 | 3.501872  |
| H  | 2.421948  | -2.734709 | 2.932668  |
| C  | -1.137699 | -3.745800 | 1.741970  |
| C  | -0.475761 | -3.367621 | -0.617058 |
| H  | 0.309659  | -3.089725 | -2.597091 |
| C  | -0.817872 | -3.800008 | 3.087525  |
| H  | 0.735274  | -3.479982 | 4.564743  |
| H  | -2.135789 | -4.032775 | 1.387414  |
| H  | -1.477532 | -3.674008 | -0.942844 |
| H  | -1.562924 | -4.124838 | 3.821943  |

|   |           |           |           |
|---|-----------|-----------|-----------|
| N | 2.081898  | -2.609869 | 0.270063  |
| B | 3.620153  | -2.333331 | 0.708437  |
| F | 4.121012  | -3.479448 | 1.274513  |
| F | 3.622291  | -1.279261 | 1.612992  |
| F | 4.299872  | -1.986027 | -0.442107 |
| C | 1.565110  | -0.212173 | -2.767894 |
| H | 0.496082  | -0.336056 | -3.047008 |
| H | 1.794601  | 0.874945  | -2.783887 |
| C | 2.480039  | -0.966056 | -3.708210 |
| H | 3.536127  | -0.930306 | -3.368366 |
| H | 2.207285  | -2.038209 | -3.797090 |
| H | 2.466966  | -0.564163 | -4.745343 |
| C | -3.718248 | -1.962161 | -1.459021 |
| C | -4.099958 | -3.076643 | -0.698510 |
| C | -3.401136 | -2.160587 | -2.807959 |
| C | -4.148611 | -4.351655 | -1.259671 |
| H | -4.361081 | -2.935121 | 0.360006  |
| C | -3.445355 | -3.435077 | -3.374035 |
| H | -3.100153 | -1.303079 | -3.423932 |
| C | -3.814679 | -4.536184 | -2.601896 |
| H | -4.444547 | -5.208735 | -0.642919 |
| H | -3.185542 | -3.568332 | -4.430845 |
| H | -3.844680 | -5.537745 | -3.046144 |
| C | -3.093698 | 3.373501  | -0.891446 |
| C | -2.360494 | 4.080482  | -1.857801 |
| C | -3.125400 | 3.882708  | 0.412089  |
| C | -1.664297 | 5.240003  | -1.530529 |
| H | -2.332041 | 3.699117  | -2.887943 |
| C | -2.431820 | 5.048281  | 0.743394  |

|   |           |           |           |
|---|-----------|-----------|-----------|
| H | -3.695549 | 3.364615  | 1.192528  |
| C | -1.692859 | 5.728513  | -0.222354 |
| H | -1.096389 | 5.770906  | -2.303761 |
| H | -2.473632 | 5.427972  | 1.771977  |
| H | -1.148501 | 6.643376  | 0.038870  |
| C | 3.456732  | 2.313165  | -0.614147 |
| C | 4.341048  | 1.231128  | -0.731688 |
| C | 3.407701  | 3.253290  | -1.648425 |
| C | 5.161001  | 1.104312  | -1.849911 |
| H | 4.385391  | 0.464584  | 0.053098  |
| C | 4.228861  | 3.127352  | -2.769967 |
| H | 2.711599  | 4.099704  | -1.572436 |
| C | 5.110661  | 2.053151  | -2.872740 |
| H | 5.842213  | 0.248098  | -1.923494 |
| H | 4.178045  | 3.876762  | -3.568658 |
| H | 5.756956  | 1.951806  | -3.752412 |
| C | -0.280536 | 1.098441  | 3.035633  |
| C | -1.023104 | 2.270686  | 3.225623  |
| C | -0.915199 | -0.128633 | 3.270847  |
| C | -2.358445 | 2.213799  | 3.626626  |
| H | -0.566840 | 3.253243  | 3.052324  |
| C | -2.249064 | -0.191002 | 3.663652  |
| H | -0.344877 | -1.055736 | 3.130443  |
| C | -2.980805 | 0.984519  | 3.841073  |
| H | -2.917607 | 3.145742  | 3.776028  |
| H | -2.718391 | -1.167115 | 3.838327  |
| H | -4.029723 | 0.943182  | 4.156756  |
| C | -0.288260 | 1.827052  | -0.045621 |
| H | -0.024784 | 2.075641  | -1.096645 |

|   |           |           |          |
|---|-----------|-----------|----------|
| H | -0.535490 | 2.783922  | 0.454542 |
| C | -1.453195 | 0.839355  | 0.033747 |
| H | -1.085973 | -0.201304 | 0.187350 |
| H | -2.086107 | 1.062521  | 0.914766 |

**II-proS<sub>1-2</sub>**

|   |           |           |           |
|---|-----------|-----------|-----------|
| C | -3.905993 | 1.824165  | -0.545570 |
| C | -4.718801 | -0.449877 | 0.727714  |
| C | -5.314239 | 1.294784  | -0.852682 |
| H | -3.255385 | 1.576959  | -1.408189 |
| C | -5.279007 | -0.213807 | -0.669611 |
| H | -5.461350 | -0.065029 | 1.458295  |
| H | -6.045327 | 1.736837  | -0.144683 |
| H | -5.633624 | 1.595965  | -1.868757 |
| H | -6.275804 | -0.681370 | -0.795098 |
| H | -4.617782 | -0.658290 | -1.442031 |
| C | 1.472030  | -2.205714 | 1.626311  |
| C | 0.771182  | -2.640866 | -0.999902 |
| C | 2.199369  | -3.328117 | 0.883298  |
| H | 0.638854  | -2.663434 | 2.197629  |
| C | 1.213640  | -3.838381 | -0.157355 |
| H | 1.616630  | -2.331262 | -1.646811 |
| H | 3.110540  | -2.941723 | 0.381409  |
| H | 2.524919  | -4.120546 | 1.582623  |
| H | 1.637967  | -4.638904 | -0.793192 |
| H | 0.340154  | -4.272483 | 0.371794  |
| P | 0.654569  | -1.223938 | 0.249206  |
| P | -3.264910 | 0.768891  | 0.910169  |

|    |           |           |           |
|----|-----------|-----------|-----------|
| Cu | 1.476940  | 0.931701  | 0.184945  |
| C  | 4.200333  | 0.603271  | -1.151606 |
| C  | 2.653797  | 2.369467  | -0.624425 |
| C  | 4.533587  | -0.584203 | -1.827093 |
| C  | 5.136894  | 1.160069  | -0.241679 |
| C  | 3.600015  | 2.955193  | 0.273666  |
| H  | 1.861341  | 2.999477  | -1.045930 |
| C  | 5.753706  | -1.203223 | -1.596320 |
| H  | 3.828120  | -1.022483 | -2.534174 |
| C  | 6.369257  | 0.513249  | -0.034435 |
| C  | 4.808398  | 2.370022  | 0.458970  |
| H  | 3.315216  | 3.877953  | 0.789354  |
| C  | 6.680306  | -0.660887 | -0.696474 |
| H  | 5.989915  | -2.129260 | -2.132367 |
| H  | 7.078612  | 0.961634  | 0.672550  |
| H  | 5.552485  | 2.804818  | 1.137137  |
| H  | 7.640391  | -1.158148 | -0.522579 |
| N  | 2.965247  | 1.241993  | -1.359788 |
| B  | 2.064459  | 1.015173  | -2.689830 |
| F  | 2.683668  | 1.669073  | -3.724537 |
| F  | 0.818689  | 1.560325  | -2.401373 |
| F  | 1.936467  | -0.335746 | -2.945169 |
| C  | 0.602758  | 2.085468  | 1.538098  |
| H  | -0.072745 | 1.404753  | 2.098539  |
| H  | 1.383110  | 2.430954  | 2.248312  |
| C  | -0.177429 | 3.243485  | 0.947990  |
| H  | -0.791338 | 3.792224  | 1.697973  |
| H  | 0.479823  | 4.000850  | 0.472797  |
| H  | -0.888599 | 2.911350  | 0.161941  |

|   |           |           |           |
|---|-----------|-----------|-----------|
| C | -4.343417 | -1.841279 | 1.140526  |
| C | -4.108429 | -2.870991 | 0.222378  |
| C | -4.164751 | -2.119251 | 2.505759  |
| C | -3.696486 | -4.133313 | 0.655198  |
| H | -4.234612 | -2.695823 | -0.853778 |
| C | -3.746633 | -3.373404 | 2.938827  |
| H | -4.350930 | -1.322376 | 3.239080  |
| C | -3.506907 | -4.390003 | 2.011195  |
| H | -3.519940 | -4.923623 | -0.084647 |
| H | -3.610758 | -3.562678 | 4.010284  |
| H | -3.183176 | -5.381764 | 2.347803  |
| C | -3.818782 | 3.302256  | -0.296091 |
| C | -4.459364 | 3.889742  | 0.803854  |
| C | -3.078491 | 4.128310  | -1.149077 |
| C | -4.360904 | 5.257698  | 1.044398  |
| H | -5.034795 | 3.258252  | 1.495445  |
| C | -2.973611 | 5.498993  | -0.911098 |
| H | -2.563517 | 3.683151  | -2.011294 |
| C | -3.614472 | 6.068882  | 0.187412  |
| H | -4.866849 | 5.695444  | 1.913121  |
| H | -2.384168 | 6.125629  | -1.590899 |
| H | -3.532578 | 7.145250  | 0.378384  |
| C | -0.447819 | -2.815434 | -1.868648 |
| C | -0.846014 | -1.774973 | -2.723722 |
| C | -1.203659 | -3.993363 | -1.870187 |
| C | -1.970454 | -1.900578 | -3.533749 |
| H | -0.259739 | -0.848618 | -2.746195 |
| C | -2.325984 | -4.125475 | -2.690801 |
| H | -0.917185 | -4.836790 | -1.231623 |



|   |           |           |           |
|---|-----------|-----------|-----------|
| C | -2.719905 | -3.079019 | -3.520126 |
| H | -2.261631 | -1.070411 | -4.188323 |
| H | -2.895839 | -5.062796 | -2.679438 |
| H | -3.601694 | -3.182917 | -4.163023 |
| C | 2.261703  | -1.321943 | 2.546241  |
| C | 1.752410  | -0.992097 | 3.807703  |
| C | 3.480414  | -0.751904 | 2.150791  |
| C | 2.434779  | -0.117420 | 4.652686  |
| H | 0.798859  | -1.429690 | 4.132222  |
| C | 4.168171  | 0.115140  | 2.997268  |
| H | 3.906924  | -0.985899 | 1.163952  |
| C | 3.647225  | 0.439652  | 4.250222  |
| H | 2.015066  | 0.127768  | 5.635191  |
| H | 5.124648  | 0.542433  | 2.671441  |
| H | 4.188722  | 1.124312  | 4.912876  |
| C | -1.912077 | -0.120665 | -0.019990 |
| H | -1.254252 | 0.702003  | -0.379184 |
| H | -2.312186 | -0.609925 | -0.928984 |
| C | -1.100136 | -1.109096 | 0.808173  |
| H | -1.029000 | -0.777739 | 1.866650  |
| H | -1.559335 | -2.117710 | 0.819533  |

***II-proR<sub>3-4</sub>***

|   |          |          |           |
|---|----------|----------|-----------|
| C | 3.256710 | 2.111440 | 0.009200  |
| C | 3.972726 | 0.398742 | -1.980197 |
| C | 4.752642 | 2.022392 | -0.295454 |
| H | 3.057508 | 1.340111 | 0.776996  |
| C | 4.956666 | 0.608616 | -0.826805 |

|    |           |           |           |
|----|-----------|-----------|-----------|
| H  | 4.403762  | 0.880365  | -2.882738 |
| H  | 5.049167  | 2.771150  | -1.059644 |
| H  | 5.359241  | 2.222719  | 0.608483  |
| H  | 6.000645  | 0.416140  | -1.142330 |
| H  | 4.734753  | -0.097828 | -0.001262 |
| C  | -0.378127 | -2.589261 | -0.982992 |
| C  | 0.661333  | -3.003227 | 1.536467  |
| C  | -0.213667 | -4.039066 | -0.503957 |
| H  | 0.476934  | -2.360563 | -1.652878 |
| C  | 0.956236  | -4.057721 | 0.470941  |
| H  | -0.176887 | -3.361752 | 2.168705  |
| H  | -1.135275 | -4.385511 | 0.006428  |
| H  | -0.051032 | -4.711959 | -1.367325 |
| H  | 1.114972  | -5.054759 | 0.924439  |
| H  | 1.880033  | -3.801351 | -0.086545 |
| P  | -0.078529 | -1.566364 | 0.566674  |
| P  | 2.468392  | 1.543030  | -1.611956 |
| Cu | -1.924330 | -0.764023 | 1.642709  |
| C  | -3.442020 | 1.610337  | -0.169548 |
| C  | -1.414347 | 2.045959  | 0.935521  |
| C  | -4.256066 | 1.706671  | -1.314377 |
| C  | -3.960477 | 0.978909  | 0.994108  |
| C  | -1.824151 | 1.386811  | 2.101531  |
| H  | -0.433420 | 2.535270  | 0.893840  |
| C  | -5.547825 | 1.211880  | -1.295272 |
| H  | -3.866861 | 2.180853  | -2.217103 |
| C  | -5.283312 | 0.497078  | 0.986646  |
| C  | -3.116841 | 0.813269  | 2.155952  |
| H  | -1.174615 | 1.428156  | 2.984166  |

|   |           |           |           |
|---|-----------|-----------|-----------|
| C | -6.073968 | 0.612837  | -0.140480 |
| H | -6.165953 | 1.296826  | -2.196234 |
| H | -5.669541 | 0.023874  | 1.897850  |
| H | -3.585921 | 0.553610  | 3.112647  |
| H | -7.102740 | 0.236762  | -0.134441 |
| N | -2.162647 | 2.165569  | -0.152305 |
| B | -1.557900 | 2.965012  | -1.433832 |
| F | -1.452015 | 2.064206  | -2.473371 |
| F | -0.320843 | 3.441268  | -1.052870 |
| F | -2.426708 | 3.990289  | -1.732293 |
| C | -3.107161 | -2.165313 | 2.436440  |
| H | -4.131643 | -2.010612 | 2.034890  |
| H | -2.753707 | -3.143966 | 2.044901  |
| C | -3.106389 | -2.187599 | 3.953771  |
| H | -3.449957 | -1.228916 | 4.394662  |
| H | -3.764355 | -2.975635 | 4.383423  |
| H | -2.092925 | -2.374873 | 4.364328  |
| C | 3.619489  | -1.013263 | -2.358180 |
| C | 4.122734  | -2.133295 | -1.683572 |
| C | 2.739716  | -1.238533 | -3.430427 |
| C | 3.736607  | -3.426251 | -2.044497 |
| H | 4.835144  | -2.005763 | -0.859695 |
| C | 2.345221  | -2.525142 | -3.787574 |
| H | 2.350487  | -0.377574 | -3.992731 |
| C | 2.836713  | -3.629824 | -3.088316 |
| H | 4.149367  | -4.284218 | -1.499123 |
| H | 1.651041  | -2.668178 | -4.624590 |
| H | 2.529611  | -4.644449 | -3.367394 |
| C | 2.690501  | 3.405587  | 0.506940  |

|   |           |           |           |
|---|-----------|-----------|-----------|
| C | 1.932478  | 3.424164  | 1.684646  |
| C | 2.859518  | 4.607781  | -0.192495 |
| C | 1.347862  | 4.603395  | 2.147375  |
| H | 1.799152  | 2.490177  | 2.251701  |
| C | 2.285253  | 5.788631  | 0.270274  |
| H | 3.437758  | 4.614495  | -1.126022 |
| C | 1.521893  | 5.790961  | 1.439706  |
| H | 0.753815  | 4.592731  | 3.069440  |
| H | 2.426941  | 6.718773  | -0.292656 |
| H | 1.064343  | 6.720317  | 1.798123  |
| C | -1.658343 | -2.237866 | -1.688067 |
| C | -1.631968 | -1.582271 | -2.923800 |
| C | -2.905679 | -2.524274 | -1.113920 |
| C | -2.813959 | -1.223739 | -3.572480 |
| H | -0.665131 | -1.348632 | -3.390312 |
| C | -4.087359 | -2.168217 | -1.758938 |
| H | -2.958662 | -3.032770 | -0.143142 |
| C | -4.046045 | -1.515357 | -2.991795 |
| H | -2.767443 | -0.709228 | -4.539272 |
| H | -5.051536 | -2.399481 | -1.289821 |
| H | -4.976743 | -1.230966 | -3.497006 |
| C | 1.766531  | -2.507523 | 2.423128  |
| C | 3.120325  | -2.668749 | 2.110113  |
| C | 1.431292  | -1.746746 | 3.554148  |
| C | 4.109410  | -2.063968 | 2.887802  |
| H | 3.418077  | -3.265608 | 1.239342  |
| C | 2.415121  | -1.139718 | 4.329451  |
| H | 0.370709  | -1.619717 | 3.817216  |
| C | 3.762085  | -1.290051 | 3.993175  |

|   |          |           |           |
|---|----------|-----------|-----------|
| H | 5.164563 | -2.200943 | 2.622505  |
| H | 2.129528 | -0.545450 | 5.205196  |
| H | 4.539458 | -0.811298 | 4.599356  |
| C | 1.391478 | -0.536264 | 0.139111  |
| H | 2.242937 | -1.208672 | -0.086732 |
| H | 1.646568 | 0.012730  | 1.067481  |
| C | 1.113006 | 0.409950  | -1.011344 |
| H | 0.776756 | -0.141332 | -1.911569 |
| H | 0.277791 | 1.094674  | -0.774521 |

***II-proS<sub>3-4</sub>***

|   |           |           |           |
|---|-----------|-----------|-----------|
| C | -4.289677 | 0.720279  | -0.444702 |
| C | -2.956512 | 2.407178  | -2.147402 |
| C | -5.012228 | 1.994574  | -0.900033 |
| H | -3.892574 | 0.904610  | 0.574723  |
| C | -3.941070 | 3.039733  | -1.168092 |
| H | -3.458818 | 2.325695  | -3.133145 |
| H | -5.581376 | 1.797444  | -1.831709 |
| H | -5.748069 | 2.322457  | -0.140871 |
| H | -4.360011 | 3.984555  | -1.566440 |
| H | -3.441320 | 3.290629  | -0.210563 |
| C | -0.428218 | 1.148780  | 2.799539  |
| C | 0.181394  | -1.529118 | 2.923213  |
| C | -0.133630 | 0.555657  | 4.183566  |
| H | -1.530052 | 1.134773  | 2.666731  |
| C | -0.553072 | -0.906528 | 4.111275  |
| H | 1.246680  | -1.661381 | 3.204815  |
| H | 0.949556  | 0.636849  | 4.411964  |

|    |           |           |           |
|----|-----------|-----------|-----------|
| H  | -0.673389 | 1.114287  | 4.970779  |
| H  | -0.345099 | -1.458709 | 5.047281  |
| H  | -1.649124 | -0.948460 | 3.946766  |
| P  | 0.235614  | -0.163438 | 1.630088  |
| P  | -2.767923 | 0.590000  | -1.589160 |
| Cu | 2.356351  | 0.286727  | 0.848553  |
| C  | 1.647375  | -0.174544 | -1.758551 |
| C  | 3.643090  | -1.429998 | -1.733444 |
| C  | 2.253767  | 0.947730  | -1.167033 |
| C  | 4.334358  | -0.351400 | -1.124769 |
| C  | 3.589456  | 0.816582  | -0.707635 |
| H  | 4.152356  | 1.700413  | -0.379242 |
| N  | 2.268260  | -1.322850 | -1.977347 |
| B  | 1.407603  | -2.577505 | -2.548483 |
| F  | 0.079015  | -2.214710 | -2.470850 |
| F  | 1.682558  | -3.660102 | -1.737577 |
| F  | 1.800773  | -2.805898 | -3.847014 |
| C  | 3.714412  | -0.131995 | 2.238116  |
| C  | 4.847062  | 0.851803  | 2.458594  |
| H  | 3.161331  | -0.294162 | 3.189217  |
| C  | 5.723710  | -0.446991 | -0.935161 |
| C  | 6.416575  | -1.582433 | -1.317856 |
| H  | 7.499506  | -1.643814 | -1.165586 |
| C  | 4.357778  | -2.577588 | -2.117674 |
| C  | 5.725402  | -2.649683 | -1.906349 |
| H  | 6.268048  | -3.550089 | -2.214700 |
| H  | 6.251506  | 0.401978  | -0.484506 |
| H  | 3.835169  | -3.409119 | -2.592943 |
| H  | 1.711689  | 1.902662  | -1.140504 |

|   |           |           |           |
|---|-----------|-----------|-----------|
| H | 0.595426  | -0.141471 | -2.066949 |
| C | -0.325260 | -2.827183 | 2.356974  |
| C | 0.378183  | -3.425966 | 1.300152  |
| C | -1.492156 | -3.447743 | 2.814197  |
| C | -0.075573 | -4.601663 | 0.710817  |
| H | 1.295385  | -2.950852 | 0.917322  |
| C | -1.945144 | -4.632541 | 2.229772  |
| H | -2.060718 | -3.013884 | 3.644963  |
| C | -1.242121 | -5.211227 | 1.176661  |
| H | 0.485318  | -5.032145 | -0.125112 |
| H | -2.860933 | -5.104201 | 2.605389  |
| H | -1.603207 | -6.137004 | 0.714176  |
| C | 0.070767  | 2.541163  | 2.533509  |
| C | -0.830407 | 3.592752  | 2.332811  |
| C | 1.443015  | 2.824301  | 2.480897  |
| C | -0.377663 | 4.888795  | 2.082404  |
| H | -1.910384 | 3.392560  | 2.374209  |
| C | 1.899899  | 4.114130  | 2.219878  |
| H | 2.169921  | 2.017413  | 2.652231  |
| C | 0.989331  | 5.153356  | 2.020437  |
| H | -1.102339 | 5.697743  | 1.930808  |
| H | 2.978532  | 4.309317  | 2.180637  |
| H | 1.346726  | 6.169929  | 1.819129  |
| C | -5.122345 | -0.528269 | -0.407516 |
| C | -5.246311 | -1.267893 | 0.774687  |
| C | -5.780153 | -0.997382 | -1.553276 |
| C | -6.007017 | -2.436561 | 0.816951  |
| H | -4.734516 | -0.920727 | 1.683345  |
| C | -6.544450 | -2.160635 | -1.514791 |

|   |           |           |           |
|---|-----------|-----------|-----------|
| H | -5.681530 | -0.447501 | -2.499296 |
| C | -6.662099 | -2.885743 | -0.327717 |
| H | -6.086087 | -3.000077 | 1.754281  |
| H | -7.049113 | -2.509469 | -2.423463 |
| H | -7.260599 | -3.803585 | -0.298462 |
| C | -1.615932 | 3.049281  | -2.356682 |
| C | -1.040151 | 3.933717  | -1.436043 |
| C | -0.860081 | 2.689550  | -3.484311 |
| C | 0.248007  | 4.435274  | -1.631073 |
| H | -1.593549 | 4.242592  | -0.540579 |
| C | 0.425114  | 3.187422  | -3.682415 |
| H | -1.294968 | 1.996414  | -4.217671 |
| C | 0.987242  | 4.065092  | -2.753287 |
| H | 0.672779  | 5.126789  | -0.892458 |
| H | 0.992796  | 2.889197  | -4.571773 |
| H | 1.998275  | 4.460148  | -2.906507 |
| C | -1.182058 | -0.451385 | 0.486515  |
| H | -0.921017 | -1.288088 | -0.193610 |
| H | -2.070565 | -0.771310 | 1.070311  |
| C | -1.444635 | 0.823432  | -0.297995 |
| H | -0.523744 | 1.146731  | -0.821401 |
| H | -1.714415 | 1.662525  | 0.374061  |
| H | 4.107963  | -1.123836 | 1.921750  |
| H | 5.539150  | 0.543758  | 3.273070  |
| H | 5.474471  | 0.978750  | 1.554625  |
| H | 4.480607  | 1.863344  | 2.732825  |

**TS-(II-III)-  $R_{3,4}$**



|    |           |           |           |
|----|-----------|-----------|-----------|
| C  | -2.160424 | 2.713496  | -0.138907 |
| C  | -0.076407 | 3.628997  | -1.659930 |
| C  | -2.022336 | 4.225671  | -0.317810 |
| H  | -1.726817 | 2.455981  | 0.848893  |
| C  | -0.533332 | 4.499981  | -0.493386 |
| H  | -0.529194 | 4.035712  | -2.587425 |
| H  | -2.562894 | 4.569075  | -1.223258 |
| H  | -2.456464 | 4.770683  | 0.542615  |
| H  | -0.317239 | 5.570930  | -0.675371 |
| H  | -0.005297 | 4.219740  | 0.440993  |
| C  | -0.233514 | -1.456399 | -2.679541 |
| C  | 2.225828  | -2.321724 | -1.807441 |
| C  | 0.661364  | -2.212869 | -3.677039 |
| H  | -0.271608 | -0.388824 | -2.972259 |
| C  | 2.113348  | -1.970257 | -3.290700 |
| H  | 2.012775  | -3.405149 | -1.697127 |
| H  | 0.447408  | -3.298881 | -3.629975 |
| H  | 0.441477  | -1.891368 | -4.711584 |
| H  | 2.816404  | -2.572176 | -3.897364 |
| H  | 2.368112  | -0.904391 | -3.462911 |
| P  | 0.728438  | -1.480571 | -1.055425 |
| P  | -0.972698 | 1.961783  | -1.424394 |
| Cu | -0.231753 | -2.099149 | 0.865978  |
| C  | -0.048791 | 0.376900  | 3.152152  |
| C  | 1.534674  | -1.299140 | 2.669314  |
| C  | -0.357694 | 1.714259  | 3.468372  |
| C  | -1.071465 | -0.599558 | 3.269961  |
| C  | 0.612597  | -2.317578 | 2.789226  |
| H  | 2.594346  | -1.536225 | 2.519332  |

|   |           |           |           |
|---|-----------|-----------|-----------|
| C | -1.621253 | 2.068507  | 3.918625  |
| H | 0.414262  | 2.479422  | 3.364730  |
| C | -2.328498 | -0.216732 | 3.761714  |
| C | -0.816339 | -2.010038 | 2.896313  |
| H | 0.965907  | -3.355855 | 2.820663  |
| C | -2.615634 | 1.100800  | 4.086299  |
| H | -1.827807 | 3.117760  | 4.159892  |
| H | -3.099038 | -0.988393 | 3.889838  |
| H | -1.393512 | -2.744053 | 3.473871  |
| H | -3.606504 | 1.375812  | 4.463633  |
| N | 1.249416  | 0.017620  | 2.775308  |
| B | 2.468953  | 1.044938  | 2.752642  |
| F | 3.529393  | 0.407438  | 2.129171  |
| F | 2.785881  | 1.385054  | 4.056380  |
| F | 2.118481  | 2.186773  | 2.035405  |
| C | -2.199372 | -2.565840 | 1.380678  |
| H | -2.961754 | -2.129761 | 2.043223  |
| H | -2.389973 | -2.133345 | 0.371703  |
| C | -2.221995 | -4.075507 | 1.358415  |
| H | -1.978930 | -4.509828 | 2.349041  |
| H | -3.218084 | -4.468661 | 1.069202  |
| H | -1.495952 | -4.494459 | 0.632317  |
| C | 1.385478  | 3.406492  | -1.906771 |
| C | 2.348309  | 3.495556  | -0.895117 |
| C | 1.799952  | 2.975371  | -3.177963 |
| C | 3.674430  | 3.133171  | -1.135157 |
| H | 2.066268  | 3.824599  | 0.110395  |
| C | 3.124205  | 2.621980  | -3.423670 |
| H | 1.057064  | 2.904288  | -3.984935 |

|   |           |           |           |
|---|-----------|-----------|-----------|
| C | 4.068889  | 2.692762  | -2.397076 |
| H | 4.403079  | 3.189574  | -0.317443 |
| H | 3.422568  | 2.288593  | -4.425124 |
| H | 5.111743  | 2.409114  | -2.583977 |
| C | -3.521059 | 2.086767  | -0.222179 |
| C | -3.794652 | 0.946633  | 0.548208  |
| C | -4.516741 | 2.549236  | -1.091808 |
| C | -5.025444 | 0.299204  | 0.467806  |
| H | -3.022902 | 0.564097  | 1.233095  |
| C | -5.751945 | 1.905811  | -1.171807 |
| H | -4.330912 | 3.429274  | -1.720422 |
| C | -6.014568 | 0.780903  | -0.389770 |
| H | -5.214464 | -0.588484 | 1.084868  |
| H | -6.519940 | 2.291872  | -1.852821 |
| H | -6.987668 | 0.279559  | -0.450931 |
| C | -1.637872 | -1.970258 | -2.525205 |
| C | -2.733210 | -1.110152 | -2.667621 |
| C | -1.882813 | -3.310869 | -2.196583 |
| C | -4.036458 | -1.574237 | -2.487074 |
| H | -2.558346 | -0.054764 | -2.914167 |
| C | -3.182977 | -3.778504 | -2.021299 |
| H | -1.040483 | -4.005477 | -2.065450 |
| C | -4.266550 | -2.909858 | -2.162479 |
| H | -4.877969 | -0.879632 | -2.598198 |
| H | -3.351333 | -4.831313 | -1.764459 |
| H | -5.289823 | -3.276883 | -2.021126 |
| C | 3.494757  | -2.008217 | -1.069747 |
| C | 4.352087  | -0.970561 | -1.454136 |
| C | 3.811594  | -2.741421 | 0.082609  |

|   |           |           |           |
|---|-----------|-----------|-----------|
| C | 5.490186  | -0.673359 | -0.705000 |
| H | 4.132740  | -0.371959 | -2.347133 |
| C | 4.946810  | -2.445015 | 0.832480  |
| H | 3.148016  | -3.561171 | 0.393376  |
| C | 5.791547  | -1.406887 | 0.440363  |
| H | 6.146240  | 0.146038  | -1.022436 |
| H | 5.175352  | -3.031264 | 1.730421  |
| H | 6.683717  | -1.168466 | 1.030336  |
| C | 1.272904  | 0.252792  | -0.759589 |
| H | 1.717260  | 0.680652  | -1.680271 |
| H | 2.093478  | 0.189196  | -0.014118 |
| C | 0.153560  | 1.121763  | -0.194291 |
| H | -0.526843 | 0.509980  | 0.439606  |
| H | 0.586764  | 1.872105  | 0.492583  |

**TS-(II-III)-S<sub>3,4</sub>**

|   |           |           |           |
|---|-----------|-----------|-----------|
| C | -2.235278 | 3.227324  | -0.349997 |
| C | -4.178203 | 1.312261  | -0.492977 |
| C | -3.684960 | 3.689934  | -0.558888 |
| H | -1.704963 | 3.319738  | -1.319034 |
| C | -4.408232 | 2.582980  | -1.304831 |
| H | -4.704776 | 1.437427  | 0.475803  |
| H | -4.169063 | 3.854855  | 0.425961  |
| H | -3.711666 | 4.658388  | -1.093773 |
| H | -5.489147 | 2.789933  | -1.431820 |
| H | -3.977474 | 2.488814  | -2.321876 |
| C | -1.712464 | -2.208274 | 0.936605  |
| C | 0.368402  | -3.082624 | -0.544175 |

|    |           |           |           |
|----|-----------|-----------|-----------|
| C  | -2.066540 | -3.434644 | 0.090392  |
| H  | -2.551301 | -1.483949 | 0.921960  |
| C  | -0.815498 | -4.070865 | -0.542856 |
| H  | 1.039390  | -3.342796 | 0.297085  |
| H  | -2.645178 | -4.166455 | 0.685725  |
| H  | -2.756858 | -3.106049 | -0.708625 |
| H  | -0.511871 | -4.981540 | 0.006909  |
| H  | -1.055135 | -4.414604 | -1.564053 |
| P  | -0.295341 | -1.410526 | 0.003815  |
| P  | -2.341771 | 1.360255  | 0.020485  |
| Cu | 1.366021  | -0.492778 | 1.341190  |
| C  | 1.462336  | 2.075425  | 0.043427  |
| C  | 3.530440  | 1.146099  | -0.577619 |
| C  | 1.595414  | 1.686876  | 1.379431  |
| C  | 3.766343  | 0.745002  | 0.764580  |
| C  | 2.740535  | 0.949977  | 1.767270  |
| H  | 3.012288  | 0.848964  | 2.824170  |
| N  | 2.352549  | 1.822544  | -0.907570 |
| B  | 1.976701  | 2.208136  | -2.433557 |
| F  | 3.021456  | 2.914102  | -2.985746 |
| F  | 0.832821  | 2.990076  | -2.380089 |
| F  | 1.740925  | 1.024889  | -3.102723 |
| C  | 2.308804  | -1.952633 | 2.333327  |
| C  | 2.813709  | -1.674948 | 3.735053  |
| H  | 2.028069  | -1.222217 | 4.374224  |
| H  | 3.149367  | -2.595598 | 4.262428  |
| H  | 3.681165  | -0.984114 | 3.750684  |
| C  | -4.606455 | 0.000279  | -1.077724 |
| C  | -4.603653 | -0.252553 | -2.455908 |

|   |           |           |           |
|---|-----------|-----------|-----------|
| C | -5.002366 | -1.037229 | -0.219050 |
| C | -4.966544 | -1.504170 | -2.955177 |
| H | -4.322799 | 0.538350  | -3.161537 |
| C | -5.368846 | -2.285986 | -0.714091 |
| H | -5.028044 | -0.851130 | 0.863856  |
| C | -5.347785 | -2.527111 | -2.088596 |
| H | -4.958119 | -1.676508 | -4.037857 |
| H | -5.674738 | -3.078249 | -0.020142 |
| H | -5.637288 | -3.507783 | -2.483330 |
| C | -1.483949 | 4.016169  | 0.686835  |
| C | -0.474402 | 4.910267  | 0.310044  |
| C | -1.785358 | 3.893269  | 2.050997  |
| C | 0.222966  | 5.650977  | 1.265235  |
| H | -0.219934 | 5.013238  | -0.753331 |
| C | -1.095810 | 4.634800  | 3.007503  |
| H | -2.572770 | 3.195618  | 2.369710  |
| C | -0.084822 | 5.515331  | 2.617529  |
| H | 1.014468  | 6.339491  | 0.946973  |
| H | -1.347099 | 4.521929  | 4.068764  |
| H | 0.462318  | 6.095105  | 3.369878  |
| C | -1.319161 | -2.444273 | 2.372264  |
| C | -1.213669 | -1.338910 | 3.232735  |
| C | -1.041699 | -3.712979 | 2.887550  |
| C | -0.846566 | -1.499359 | 4.564500  |
| H | -1.438223 | -0.334893 | 2.842782  |
| C | -0.669160 | -3.876393 | 4.224385  |
| H | -1.114615 | -4.598624 | 2.245059  |
| C | -0.571129 | -2.773362 | 5.067163  |
| H | -0.777929 | -0.622784 | 5.219828  |

|   |           |           |           |
|---|-----------|-----------|-----------|
| H | -0.456905 | -4.881571 | 4.607077  |
| H | -0.281344 | -2.902848 | 6.116330  |
| C | 1.224403  | -2.954005 | -1.775752 |
| C | 0.742967  | -3.192857 | -3.068734 |
| C | 2.543577  | -2.495880 | -1.637072 |
| C | 1.554488  | -2.989919 | -4.184877 |
| H | -0.288768 | -3.533974 | -3.219425 |
| C | 3.356053  | -2.293482 | -2.750099 |
| H | 2.939194  | -2.294568 | -0.630361 |
| C | 2.864749  | -2.541475 | -4.031443 |
| H | 1.153506  | -3.184577 | -5.186484 |
| H | 4.384368  | -1.939331 | -2.610997 |
| H | 3.501983  | -2.383806 | -4.909042 |
| C | -1.106005 | -0.747523 | -1.531677 |
| H | -1.993341 | -1.374296 | -1.753272 |
| H | -0.383288 | -0.918155 | -2.354153 |
| C | -1.466658 | 0.731801  | -1.507676 |
| H | -0.539349 | 1.328708  | -1.577243 |
| H | -2.039120 | 0.985950  | -2.422229 |
| H | 0.848478  | 2.032899  | 2.105010  |
| H | 0.586199  | 2.654115  | -0.263812 |
| C | 4.980134  | 0.113311  | 1.090481  |
| C | 5.933894  | -0.139889 | 0.121883  |
| H | 6.874361  | -0.633563 | 0.389016  |
| C | 5.687556  | 0.241457  | -1.204895 |
| H | 6.436616  | 0.041610  | -1.979597 |
| C | 4.507714  | 0.876966  | -1.553424 |
| H | 4.336003  | 1.180130  | -2.587699 |
| H | 5.149977  | -0.183368 | 2.132628  |

|   |          |           |          |
|---|----------|-----------|----------|
| H | 3.136807 | -2.291141 | 1.671920 |
| H | 1.554817 | -2.767189 | 2.364775 |

### III-R<sub>1-2</sub>

|    |           |           |           |
|----|-----------|-----------|-----------|
| C  | -4.150875 | -1.853425 | 0.721740  |
| C  | -3.570263 | 0.343472  | 2.240354  |
| C  | -4.253194 | -1.995712 | 2.243781  |
| H  | -3.179208 | -2.288338 | 0.412221  |
| C  | -3.247060 | -1.022799 | 2.835745  |
| H  | -4.535681 | 0.680933  | 2.670764  |
| H  | -5.274469 | -1.733681 | 2.588530  |
| H  | -4.069039 | -3.041816 | 2.554126  |
| H  | -3.273838 | -0.998656 | 3.942749  |
| H  | -2.227094 | -1.349551 | 2.547688  |
| C  | 0.088543  | 0.184569  | -2.725178 |
| C  | 0.585788  | 2.791432  | -2.013476 |
| C  | 0.831674  | 1.077368  | -3.729907 |
| H  | -0.966462 | 0.111460  | -3.057543 |
| C  | 0.367864  | 2.508613  | -3.500359 |
| H  | 1.680078  | 2.761141  | -1.830243 |
| H  | 1.926011  | 1.010048  | -3.563342 |
| H  | 0.641370  | 0.728682  | -4.761574 |
| H  | 0.919889  | 3.237060  | -4.123272 |
| H  | -0.704447 | 2.599464  | -3.767263 |
| P  | -0.010169 | 1.232553  | -1.161717 |
| P  | -4.010806 | 0.021047  | 0.406203  |
| Cu | 1.101793  | 0.678554  | 0.703910  |
| C  | 4.278266  | -0.691608 | 0.290129  |



|   |           |           |           |
|---|-----------|-----------|-----------|
| C | 2.724894  | -1.437558 | 2.034725  |
| C | 5.176663  | -0.976304 | -0.771152 |
| C | 3.815738  | 0.656123  | 0.381486  |
| C | 2.469136  | 0.024358  | 2.324655  |
| H | 2.915491  | -1.935863 | 3.003176  |
| C | 5.524530  | -0.008584 | -1.698674 |
| H | 5.582120  | -1.986912 | -0.864757 |
| C | 4.192884  | 1.622806  | -0.565268 |
| C | 3.007172  | 1.004566  | 1.533116  |
| H | 1.985983  | 0.280186  | 3.278353  |
| C | 5.028674  | 1.303539  | -1.622621 |
| H | 6.205071  | -0.282830 | -2.514290 |
| H | 3.820584  | 2.649622  | -0.436575 |
| H | 2.919391  | 2.067084  | 1.812513  |
| H | 5.317266  | 2.057946  | -2.362121 |
| N | 3.914757  | -1.632541 | 1.208765  |
| B | 4.787657  | -2.914742 | 1.410690  |
| F | 4.673384  | -3.777796 | 0.306237  |
| F | 4.354694  | -3.572015 | 2.557871  |
| F | 6.124863  | -2.547912 | 1.552203  |
| C | 1.457411  | -2.082743 | 1.449733  |
| H | 0.599658  | -1.765724 | 2.084739  |
| H | 1.285857  | -1.657211 | 0.431563  |
| C | 1.485982  | -3.596080 | 1.355963  |
| H | 1.673583  | -4.045625 | 2.348934  |
| H | 0.524067  | -3.984198 | 0.972321  |
| H | 2.287470  | -3.935692 | 0.677088  |
| C | -2.579655 | 1.456815  | 2.407767  |
| C | -1.234950 | 1.245236  | 2.740833  |

|   |           |           |           |
|---|-----------|-----------|-----------|
| C | -3.002372 | 2.778055  | 2.185607  |
| C | -0.345560 | 2.320995  | 2.839687  |
| H | -0.875352 | 0.232740  | 2.966499  |
| C | -2.114759 | 3.846655  | 2.262069  |
| H | -4.055809 | 2.961772  | 1.933512  |
| C | -0.776444 | 3.621671  | 2.589575  |
| H | 0.690321  | 2.146067  | 3.155717  |
| H | -2.468337 | 4.867097  | 2.071872  |
| H | -0.077632 | 4.461804  | 2.669405  |
| C | -5.237642 | -2.504777 | -0.082317 |
| C | -4.922335 | -3.425285 | -1.088566 |
| C | -6.587925 | -2.195958 | 0.134886  |
| C | -5.923177 | -4.027835 | -1.851462 |
| H | -3.868882 | -3.676614 | -1.273957 |
| C | -7.590169 | -2.797664 | -0.621276 |
| H | -6.859518 | -1.461509 | 0.905503  |
| C | -7.261535 | -3.718160 | -1.618334 |
| H | -5.652707 | -4.747770 | -2.632882 |
| H | -8.639961 | -2.542797 | -0.433931 |
| H | -8.050430 | -4.191287 | -2.214427 |
| C | 0.626980  | -1.203768 | -2.531782 |
| C | -0.217492 | -2.312014 | -2.670014 |
| C | 1.967156  | -1.424420 | -2.189303 |
| C | 0.261694  | -3.607514 | -2.475060 |
| H | -1.269753 | -2.158475 | -2.946132 |
| C | 2.447438  | -2.716315 | -1.986397 |
| H | 2.653585  | -0.575230 | -2.054596 |
| C | 1.596729  | -3.812191 | -2.132747 |
| H | -0.415986 | -4.461342 | -2.592997 |

|   |           |           |           |
|---|-----------|-----------|-----------|
| H | 3.487939  | -2.866681 | -1.675204 |
| H | 1.976602  | -4.826897 | -1.965034 |
| C | 0.049635  | 4.059767  | -1.417798 |
| C | -1.177617 | 4.612771  | -1.806132 |
| C | 0.785587  | 4.709078  | -0.418089 |
| C | -1.650402 | 5.782321  | -1.212497 |
| H | -1.775983 | 4.133819  | -2.590843 |
| C | 0.317615  | 5.880037  | 0.173512  |
| H | 1.752534  | 4.288945  | -0.106028 |
| C | -0.904912 | 6.421168  | -0.221872 |
| H | -2.610265 | 6.202295  | -1.534564 |
| H | 0.916269  | 6.376682  | 0.946272  |
| H | -1.274883 | 7.344974  | 0.237521  |
| C | -1.816813 | 1.362039  | -0.853558 |
| H | -2.354436 | 1.678617  | -1.768909 |
| H | -1.962210 | 2.153755  | -0.092907 |
| C | -2.308510 | 0.003066  | -0.363416 |
| H | -2.375528 | -0.708381 | -1.212145 |
| H | -1.585000 | -0.445005 | 0.353535  |

### III-S<sub>1,2</sub>

|   |           |          |           |
|---|-----------|----------|-----------|
| C | -3.959835 | 0.163008 | -1.309831 |
| C | -2.145107 | 1.942317 | -2.325633 |
| C | -4.328057 | 0.905069 | -2.604449 |
| H | -4.594709 | 0.544430 | -0.485547 |
| C | -3.610582 | 2.249237 | -2.613026 |
| H | -1.757396 | 1.315439 | -3.157059 |
| H | -3.996379 | 0.326220 | -3.487257 |

|    |           |           |           |
|----|-----------|-----------|-----------|
| H  | -5.424817 | 1.012731  | -2.691518 |
| H  | -3.732139 | 2.779737  | -3.577031 |
| H  | -4.037418 | 2.907881  | -1.829949 |
| C  | 1.599911  | 2.222717  | 1.916408  |
| C  | -0.092822 | 0.453602  | 3.159522  |
| C  | 1.953504  | 1.755653  | 3.337236  |
| H  | 1.155556  | 3.236101  | 1.994248  |
| C  | 0.648308  | 1.447338  | 4.050541  |
| H  | 0.484760  | -0.490455 | 3.171330  |
| H  | 2.579952  | 0.841077  | 3.276307  |
| H  | 2.556916  | 2.525514  | 3.853728  |
| H  | 0.802950  | 1.029282  | 5.063679  |
| H  | 0.071467  | 2.385915  | 4.173084  |
| P  | 0.161275  | 1.116299  | 1.407747  |
| P  | -2.215075 | 0.747545  | -0.877726 |
| Cu | -0.178493 | -0.306892 | -0.398062 |
| C  | 1.720640  | -3.362696 | 0.671893  |
| C  | 2.013467  | -1.993377 | -1.332374 |
| C  | 0.321976  | -3.635247 | 0.197482  |
| C  | 0.590377  | -1.960288 | -1.544351 |
| C  | -0.225572 | -2.921282 | -0.798606 |
| H  | -1.261638 | -3.087811 | -1.127823 |
| N  | 2.563013  | -2.786984 | -0.380701 |
| B  | 4.091492  | -3.129651 | -0.415596 |
| F  | 4.858137  | -1.982196 | -0.145683 |
| F  | 4.433594  | -3.610451 | -1.678125 |
| F  | 4.356196  | -4.099860 | 0.543021  |
| C  | 0.057411  | -1.265259 | -2.663390 |
| C  | 0.864587  | -0.534273 | -3.522163 |

|   |           |           |           |
|---|-----------|-----------|-----------|
| H | 0.436898  | -0.000610 | -4.378050 |
| C | 2.807753  | -1.218407 | -2.221567 |
| C | 2.245654  | -0.514206 | -3.271098 |
| H | 2.906976  | 0.063921  | -3.928736 |
| H | -1.018444 | -1.373889 | -2.862029 |
| H | 3.890452  | -1.204586 | -2.083552 |
| H | -0.259697 | -4.401143 | 0.727127  |
| H | 2.188099  | -4.315297 | 0.979769  |
| C | -1.522322 | 0.119280  | 3.469229  |
| C | -2.046769 | -1.105394 | 3.027520  |
| C | -2.365888 | 0.990040  | 4.169053  |
| C | -3.372952 | -1.447382 | 3.278033  |
| H | -1.395599 | -1.806245 | 2.484194  |
| C | -3.699118 | 0.654462  | 4.407907  |
| H | -1.983013 | 1.945908  | 4.545616  |
| C | -4.208761 | -0.563959 | 3.963329  |
| H | -3.755284 | -2.419335 | 2.944147  |
| H | -4.342072 | 1.351108  | 4.958210  |
| H | -5.252662 | -0.832257 | 4.161852  |
| C | 2.782274  | 2.293300  | 0.992889  |
| C | 3.390859  | 3.532564  | 0.758537  |
| C | 3.353078  | 1.149465  | 0.422055  |
| C | 4.535091  | 3.632810  | -0.030492 |
| H | 2.953926  | 4.436744  | 1.204063  |
| C | 4.501320  | 1.244649  | -0.363614 |
| H | 2.902956  | 0.158227  | 0.583855  |
| C | 5.093021  | 2.486347  | -0.595964 |
| H | 4.994450  | 4.613340  | -0.203249 |
| H | 4.935149  | 0.328435  | -0.778212 |

|   |           |           |           |
|---|-----------|-----------|-----------|
| H | 5.995560  | 2.558906  | -1.213891 |
| C | -4.031220 | -1.340692 | -1.311359 |
| C | -4.335571 | -2.006999 | -0.116849 |
| C | -3.717975 | -2.113614 | -2.436505 |
| C | -4.322506 | -3.398163 | -0.042908 |
| H | -4.584876 | -1.415112 | 0.775377  |
| C | -3.710614 | -3.507241 | -2.368252 |
| H | -3.472285 | -1.632587 | -3.391632 |
| C | -4.009734 | -4.156348 | -1.171562 |
| H | -4.568424 | -3.896188 | 0.902774  |
| H | -3.464493 | -4.090438 | -3.263167 |
| H | -4.002973 | -5.250889 | -1.119165 |
| C | -1.171427 | 3.057888  | -2.083407 |
| C | -1.571334 | 4.362324  | -1.778181 |
| C | 0.201944  | 2.765320  | -2.101986 |
| C | -0.622690 | 5.341953  | -1.472985 |
| H | -2.635572 | 4.626831  | -1.773217 |
| C | 1.147653  | 3.738329  | -1.798064 |
| H | 0.533443  | 1.748417  | -2.360598 |
| C | 0.736151  | 5.033173  | -1.472319 |
| H | -0.954593 | 6.359175  | -1.234262 |
| H | 2.214439  | 3.482653  | -1.812146 |
| H | 1.479010  | 5.801883  | -1.227665 |
| C | -1.201115 | 2.370872  | 1.210570  |
| H | -1.403353 | 2.848634  | 2.189803  |
| H | -0.777846 | 3.159286  | 0.557357  |
| C | -2.493195 | 1.823860  | 0.611072  |
| H | -3.188816 | 2.653542  | 0.374385  |
| H | -3.013758 | 1.171895  | 1.343998  |

|   |          |           |          |
|---|----------|-----------|----------|
| C | 1.652328 | -2.456756 | 1.907643 |
| H | 1.218677 | -1.496162 | 1.555780 |
| H | 0.908544 | -2.890798 | 2.610573 |
| C | 2.963729 | -2.208036 | 2.626685 |
| H | 3.692288 | -1.689328 | 1.977537 |
| H | 2.805509 | -1.586280 | 3.529681 |
| H | 3.428468 | -3.157670 | 2.950703 |

### **EtMgBr**

|    |           |           |           |
|----|-----------|-----------|-----------|
| C  | 3.665331  | -0.579973 | 0.000017  |
| H  | 3.519564  | -1.231160 | 0.885705  |
| H  | 3.519604  | -1.231090 | -0.885728 |
| H  | 4.741290  | -0.296031 | 0.000053  |
| C  | 2.712398  | 0.614969  | 0.000042  |
| H  | 2.932050  | 1.259539  | -0.879254 |
| H  | 2.932029  | 1.259483  | 0.879386  |
| Mg | 0.639519  | 0.186040  | 0.000021  |
| Br | -1.816718 | -0.062949 | -0.000022 |

### **Et<sub>2</sub>O**

|   |           |           |           |
|---|-----------|-----------|-----------|
| O | 0.074236  | -0.590758 | -0.295823 |
| C | -1.238248 | -0.626216 | 0.200003  |
| C | 0.913893  | 0.349567  | 0.318735  |
| C | 2.329842  | 0.105674  | -0.138276 |
| H | 0.605332  | 1.388573  | 0.065481  |
| H | 0.837191  | 0.257885  | 1.427558  |
| H | 3.023002  | 0.835334  | 0.316312  |

|   |           |           |           |
|---|-----------|-----------|-----------|
| H | 2.659764  | -0.911734 | 0.140545  |
| H | 2.401651  | 0.197739  | -1.237525 |
| H | -1.699881 | -1.533260 | -0.232872 |
| H | -1.220991 | -0.767730 | 1.305642  |
| C | -2.063347 | 0.593358  | -0.157041 |
| H | -3.116891 | 0.448261  | 0.143324  |
| H | -1.699099 | 1.507907  | 0.346398  |
| H | -2.036806 | 0.768790  | -1.248799 |

### **V·2Et<sub>2</sub>O**

|    |           |           |           |
|----|-----------|-----------|-----------|
| C  | -3.622484 | -0.704994 | 1.755425  |
| C  | -2.355823 | -0.531554 | 1.246125  |
| C  | -2.047203 | -0.987087 | -0.060723 |
| C  | -3.061656 | -1.630678 | -0.828429 |
| C  | -4.355882 | -1.794366 | -0.273713 |
| C  | -4.632313 | -1.337819 | 0.993067  |
| H  | -3.852564 | -0.350431 | 2.766342  |
| H  | -1.568446 | -0.046380 | 1.837490  |
| C  | -2.725284 | -2.082193 | -2.126761 |
| H  | -5.126208 | -2.291060 | -0.875687 |
| H  | -5.633763 | -1.464620 | 1.418405  |
| C  | -1.451286 | -1.893219 | -2.605544 |
| C  | -0.514676 | -1.235841 | -1.781569 |
| H  | -3.492040 | -2.578611 | -2.734120 |
| H  | -1.155806 | -2.229002 | -3.603647 |
| H  | 0.504226  | -1.042292 | -2.148990 |
| N  | -0.792001 | -0.796024 | -0.568938 |
| Mg | 0.774770  | 0.380319  | 0.455606  |



|    |           |           |           |
|----|-----------|-----------|-----------|
| Br | 2.250179  | 1.377171  | -1.403123 |
| C  | 0.884139  | 0.434971  | 2.606945  |
| H  | 0.633230  | -0.582500 | 2.991761  |
| C  | 2.299481  | 0.789565  | 3.066651  |
| H  | 0.155213  | 1.110165  | 3.113442  |
| H  | 2.479295  | 0.731948  | 4.166054  |
| H  | 3.056945  | 0.123339  | 2.597777  |
| H  | 2.584051  | 1.821435  | 2.764444  |
| O  | -0.587005 | 2.120262  | 0.186447  |
| C  | -0.306855 | 3.224866  | 1.038256  |
| H  | 0.138298  | 4.049565  | 0.446079  |
| H  | 0.477101  | 2.860690  | 1.725528  |
| C  | -1.518649 | 3.683532  | 1.814019  |
| H  | -1.225921 | 4.442795  | 2.561159  |
| H  | -2.288897 | 4.139267  | 1.164179  |
| H  | -1.977584 | 2.830275  | 2.349667  |
| C  | -1.487922 | 2.361924  | -0.888253 |
| H  | -1.498846 | 1.424279  | -1.471217 |
| H  | -2.512769 | 2.499583  | -0.483173 |
| C  | -1.092801 | 3.513879  | -1.783078 |
| H  | -0.043938 | 3.397699  | -2.114447 |
| H  | -1.742163 | 3.521186  | -2.676919 |
| H  | -1.203101 | 4.497372  | -1.290639 |
| O  | 1.926076  | -1.539224 | 0.420009  |
| C  | 3.284788  | -1.700369 | 0.024537  |
| H  | 3.892661  | -2.002385 | 0.900816  |
| H  | 3.612340  | -0.690094 | -0.274166 |
| C  | 3.452359  | -2.665673 | -1.124744 |
| H  | 4.503183  | -2.664256 | -1.465773 |

|   |          |           |           |
|---|----------|-----------|-----------|
| H | 3.196378 | -3.706096 | -0.850144 |
| H | 2.817006 | -2.363065 | -1.978938 |
| C | 1.283896 | -2.687853 | 0.959405  |
| H | 0.276916 | -2.344147 | 1.256016  |
| H | 1.139438 | -3.443364 | 0.158008  |
| C | 1.991931 | -3.284193 | 2.153451  |
| H | 2.945877 | -3.774209 | 1.885908  |
| H | 2.197379 | -2.503045 | 2.909780  |
| H | 1.347880 | -4.052386 | 2.617561  |

**TS-(V-VI)·2Et<sub>2</sub>O**

|   |           |           |           |
|---|-----------|-----------|-----------|
| C | -3.388601 | 2.041363  | 0.762698  |
| C | -2.264879 | 1.578500  | 0.103255  |
| C | -2.280927 | 0.334838  | -0.576765 |
| C | -3.496852 | -0.411453 | -0.575643 |
| C | -4.626283 | 0.084866  | 0.102793  |
| C | -4.581323 | 1.294243  | 0.773989  |
| H | -3.348803 | 3.006663  | 1.282145  |
| H | -1.338568 | 2.165572  | 0.087471  |
| C | -3.509635 | -1.650632 | -1.294276 |
| H | -5.548366 | -0.511056 | 0.087510  |
| H | -5.464788 | 1.671680  | 1.300532  |
| C | -2.382229 | -2.105903 | -1.901742 |
| C | -1.169814 | -1.343127 | -1.781571 |
| H | -4.450243 | -2.213766 | -1.356726 |
| H | -2.370249 | -3.046541 | -2.463097 |
| H | -0.386683 | -1.540882 | -2.527002 |
| N | -1.166145 | -0.104726 | -1.230689 |

|    |           |           |           |
|----|-----------|-----------|-----------|
| C  | 0.011048  | -2.758048 | -0.372797 |
| H  | -0.050317 | -3.463839 | -1.225190 |
| H  | 1.076205  | -2.843112 | -0.044276 |
| C  | -0.914861 | -3.179002 | 0.749095  |
| H  | -0.729296 | -2.603295 | 1.677332  |
| H  | -1.982813 | -3.015109 | 0.487641  |
| H  | -0.833852 | -4.253769 | 1.027399  |
| Mg | 0.740250  | -0.483250 | -0.345984 |
| Br | 3.130113  | -0.930116 | -1.116915 |
| O  | 0.774585  | -0.403500 | 1.742173  |
| O  | 1.170506  | 1.649680  | -0.504995 |
| C  | -0.049620 | 0.455683  | 2.544304  |
| H  | 0.543657  | 0.788139  | 3.418407  |
| H  | -0.251937 | 1.351547  | 1.929758  |
| C  | -1.339861 | -0.203161 | 2.962405  |
| H  | -1.166597 | -1.089078 | 3.600641  |
| H  | -1.950051 | 0.514538  | 3.540648  |
| H  | -1.928356 | -0.513826 | 2.077787  |
| C  | 1.632605  | -1.279055 | 2.494261  |
| H  | 1.082674  | -1.610696 | 3.395669  |
| H  | 1.792017  | -2.172074 | 1.864546  |
| C  | 2.943560  | -0.622506 | 2.844889  |
| H  | 2.797924  | 0.292412  | 3.449144  |
| H  | 3.561626  | -1.319077 | 3.439376  |
| H  | 3.503453  | -0.362257 | 1.927669  |
| C  | 2.105002  | 2.264581  | 0.381177  |
| H  | 3.124040  | 2.150378  | -0.042322 |
| H  | 2.074597  | 1.663136  | 1.305884  |
| C  | 1.779354  | 3.708327  | 0.675714  |

|   |           |          |           |
|---|-----------|----------|-----------|
| H | 2.473871  | 4.098996 | 1.440943  |
| H | 1.879771  | 4.349332 | -0.219054 |
| H | 0.747539  | 3.810829 | 1.062787  |
| C | 1.224569  | 2.125221 | -1.858540 |
| H | 2.199771  | 2.628985 | -2.008210 |
| H | 1.231776  | 1.237234 | -2.518639 |
| C | 0.069073  | 3.027157 | -2.214192 |
| H | 0.005966  | 3.901958 | -1.542056 |
| H | 0.194543  | 3.398302 | -3.247846 |
| H | -0.885132 | 2.474031 | -2.161940 |

### **VI·2Et<sub>2</sub>O**

|   |           |           |           |
|---|-----------|-----------|-----------|
| C | -2.316472 | 2.473229  | 1.331594  |
| C | -1.485462 | 1.415228  | 0.981898  |
| C | -1.936616 | 0.333519  | 0.179739  |
| C | -3.300832 | 0.391175  | -0.248000 |
| C | -4.117313 | 1.463990  | 0.117423  |
| C | -3.647819 | 2.514146  | 0.906704  |
| H | -1.915099 | 3.281968  | 1.956013  |
| H | -0.451336 | 1.413154  | 1.357828  |
| C | -3.749895 | -0.645470 | -1.160544 |
| H | -5.154137 | 1.471507  | -0.248598 |
| H | -4.303657 | 3.346663  | 1.185242  |
| C | -2.949279 | -1.672109 | -1.486942 |
| C | -1.603974 | -1.863263 | -0.844342 |
| H | -4.748689 | -0.543026 | -1.608882 |
| H | -3.280598 | -2.439118 | -2.201121 |
| H | -0.890301 | -2.164587 | -1.647174 |

|    |           |           |           |
|----|-----------|-----------|-----------|
| N  | -1.080997 | -0.648112 | -0.216869 |
| C  | -1.621209 | -3.056633 | 0.129388  |
| H  | -1.954215 | -3.956901 | -0.429955 |
| H  | -0.571481 | -3.259420 | 0.432720  |
| C  | -2.490307 | -2.855874 | 1.355794  |
| H  | -2.464176 | -3.740061 | 2.019796  |
| H  | -2.153776 | -1.982431 | 1.946014  |
| H  | -3.546771 | -2.678102 | 1.076450  |
| Mg | 0.889652  | -0.296464 | -0.270709 |
| Br | 2.406854  | -1.770056 | -1.549810 |
| O  | 1.624587  | -0.268618 | 1.665542  |
| O  | 1.088294  | 1.582636  | -1.109136 |
| C  | 1.113372  | -1.252069 | 2.592701  |
| H  | 1.969312  | -1.638682 | 3.178355  |
| H  | 0.730100  | -2.100925 | 1.993133  |
| C  | 0.029623  | -0.690344 | 3.476406  |
| H  | -0.814037 | -0.312440 | 2.870970  |
| H  | -0.355424 | -1.486499 | 4.139005  |
| H  | 0.400633  | 0.135597  | 4.109002  |
| C  | 2.918447  | 0.255871  | 1.990784  |
| H  | 3.226980  | 0.854567  | 1.114646  |
| H  | 3.629325  | -0.590376 | 2.072561  |
| C  | 2.913877  | 1.108672  | 3.235031  |
| H  | 2.710306  | 0.515779  | 4.144456  |
| H  | 3.903305  | 1.582128  | 3.363520  |
| H  | 2.153230  | 1.909012  | 3.163662  |
| C  | 1.629182  | 2.754617  | -0.492403 |
| H  | 1.536677  | 2.597141  | 0.598255  |
| H  | 0.978857  | 3.616135  | -0.739798 |

|   |           |          |           |
|---|-----------|----------|-----------|
| C | 3.060970  | 3.002640 | -0.895386 |
| H | 3.154965  | 3.206073 | -1.977103 |
| H | 3.459740  | 3.878696 | -0.353831 |
| H | 3.698086  | 2.130097 | -0.660576 |
| C | 0.617722  | 1.767945 | -2.457387 |
| H | 1.301995  | 2.474101 | -2.964248 |
| H | 0.742444  | 0.790100 | -2.957661 |
| C | -0.812817 | 2.241857 | -2.509444 |
| H | -0.946178 | 3.193883 | -1.962655 |
| H | -1.107191 | 2.411706 | -3.560265 |
| H | -1.497849 | 1.495688 | -2.069151 |

**TS-(V-VII)·2Et<sub>2</sub>O**

|   |           |           |           |
|---|-----------|-----------|-----------|
| C | 5.120567  | -0.228570 | 0.032548  |
| C | 4.223783  | -0.840427 | -0.821478 |
| C | 2.976888  | -0.246790 | -1.130627 |
| C | 2.647374  | 0.992831  | -0.512342 |
| C | 3.592105  | 1.611041  | 0.329458  |
| C | 4.811799  | 1.017688  | 0.606265  |
| H | 6.082119  | -0.708358 | 0.251834  |
| H | 4.452266  | -1.799545 | -1.301346 |
| C | 1.334101  | 1.579501  | -0.763666 |
| H | 3.345678  | 2.581514  | 0.778400  |
| H | 5.530669  | 1.515672  | 1.266754  |
| C | 0.591538  | 0.948457  | -1.812504 |
| C | 1.065708  | -0.249761 | -2.380136 |
| H | 1.250936  | 2.668098  | -0.666283 |
| H | -0.273208 | 1.456823  | -2.262409 |

|    |           |           |           |
|----|-----------|-----------|-----------|
| H  | 0.454777  | -0.717390 | -3.170155 |
| N  | 2.173205  | -0.877701 | -2.046903 |
| C  | 0.466089  | 1.642333  | 1.289677  |
| H  | -0.474133 | 1.300636  | 1.785971  |
| H  | 1.275621  | 1.099136  | 1.816941  |
| C  | 0.558145  | 3.135764  | 1.526679  |
| H  | -0.159316 | 3.706172  | 0.900576  |
| H  | 0.355295  | 3.420487  | 2.579993  |
| H  | 1.560586  | 3.540970  | 1.289447  |
| Mg | -0.614965 | -0.018418 | 0.000347  |
| Br | -1.396521 | -2.219851 | -1.041066 |
| O  | -2.454657 | 1.014732  | -0.189126 |
| O  | -0.670746 | -1.069843 | 1.864426  |
| C  | -3.512922 | 0.526489  | -1.045134 |
| H  | -4.441676 | 1.051503  | -0.753768 |
| H  | -3.634689 | -0.544602 | -0.807034 |
| C  | -3.212869 | 0.708829  | -2.511412 |
| H  | -4.077382 | 0.360996  | -3.105874 |
| H  | -3.024725 | 1.766396  | -2.769753 |
| H  | -2.338629 | 0.104117  | -2.814367 |
| C  | -2.743958 | 2.266556  | 0.449136  |
| H  | -2.036569 | 2.355156  | 1.289567  |
| H  | -3.758046 | 2.201899  | 0.889762  |
| C  | -2.617304 | 3.442399  | -0.486317 |
| H  | -3.398168 | 3.438582  | -1.268397 |
| H  | -2.717200 | 4.385460  | 0.080812  |
| H  | -1.627001 | 3.442281  | -0.981698 |
| C  | -1.955061 | -1.112805 | 2.491756  |
| H  | -2.640839 | -0.536256 | 1.841575  |

|   |           |           |          |
|---|-----------|-----------|----------|
| H | -2.315393 | -2.161158 | 2.482642 |
| C | -1.926882 | -0.532225 | 3.885062 |
| H | -1.586142 | 0.519527  | 3.863987 |
| H | -2.939381 | -0.558136 | 4.325760 |
| H | -1.256761 | -1.098317 | 4.556679 |
| C | 0.171725  | -2.172349 | 2.205511 |
| H | 0.232934  | -2.233874 | 3.309625 |
| H | -0.308438 | -3.101424 | 1.834701 |
| C | 1.541201  | -1.998132 | 1.606100 |
| H | 1.521533  | -2.057579 | 0.501097 |
| H | 1.997916  | -1.034988 | 1.903764 |
| H | 2.203808  | -2.808166 | 1.958811 |

### VII·2Et<sub>2</sub>O

|   |           |           |           |
|---|-----------|-----------|-----------|
| C | -2.135000 | 2.989758  | -0.002348 |
| C | -1.307094 | 1.873793  | 0.003760  |
| C | -1.795813 | 0.570808  | -0.231935 |
| C | -3.192097 | 0.424263  | -0.444456 |
| C | -4.003185 | 1.560126  | -0.470479 |
| C | -3.499991 | 2.843710  | -0.257053 |
| H | -1.705008 | 3.982793  | 0.181670  |
| H | -0.230952 | 2.008101  | 0.184366  |
| C | -3.805665 | -0.955243 | -0.535608 |
| H | -5.079446 | 1.421624  | -0.651066 |
| H | -4.164194 | 3.715230  | -0.278870 |
| C | -2.753581 | -1.935949 | -0.970087 |
| C | -1.445933 | -1.682840 | -0.750396 |
| H | -4.639072 | -0.928376 | -1.274740 |



|    |           |           |           |
|----|-----------|-----------|-----------|
| H  | -3.050248 | -2.903476 | -1.393566 |
| H  | -0.697706 | -2.458899 | -0.983013 |
| N  | -0.915871 | -0.494146 | -0.279828 |
| C  | -4.437512 | -1.347986 | 0.814641  |
| H  | -3.638826 | -1.326275 | 1.587248  |
| H  | -5.167869 | -0.562479 | 1.102240  |
| C  | -5.116817 | -2.704586 | 0.800570  |
| H  | -5.618377 | -2.920098 | 1.762091  |
| H  | -5.885556 | -2.755669 | 0.003788  |
| H  | -4.392595 | -3.519976 | 0.614812  |
| Mg | 1.073489  | -0.420600 | 0.052925  |
| Br | 2.354083  | -2.530940 | -0.074878 |
| O  | 1.515417  | 0.482072  | 1.865976  |
| O  | 2.009787  | 0.898217  | -1.234292 |
| C  | 0.418564  | 0.661464  | 2.784570  |
| H  | 0.547988  | -0.058028 | 3.616350  |
| H  | -0.493231 | 0.368588  | 2.232175  |
| C  | 0.322522  | 2.084124  | 3.273266  |
| H  | -0.546537 | 2.187591  | 3.947033  |
| H  | 1.220127  | 2.395294  | 3.837778  |
| H  | 0.180992  | 2.781749  | 2.427282  |
| C  | 2.780326  | 0.277085  | 2.521261  |
| H  | 2.810016  | -0.768940 | 2.887198  |
| H  | 2.821081  | 0.945916  | 3.400663  |
| C  | 3.922121  | 0.567881  | 1.586255  |
| H  | 4.876033  | 0.392356  | 2.113857  |
| H  | 3.908492  | -0.095908 | 0.700717  |
| H  | 3.907028  | 1.620808  | 1.252924  |
| C  | 2.225395  | 2.296798  | -1.008981 |

|   |          |           |           |
|---|----------|-----------|-----------|
| H | 1.915567 | 2.475989  | 0.037742  |
| H | 3.315943 | 2.489969  | -1.062172 |
| C | 1.463093 | 3.182094  | -1.962710 |
| H | 0.378719 | 2.966663  | -1.926124 |
| H | 1.615786 | 4.239834  | -1.682543 |
| H | 1.810602 | 3.065246  | -3.005186 |
| C | 2.516502 | 0.375234  | -2.477985 |
| H | 3.224549 | 1.112783  | -2.898855 |
| H | 3.095529 | -0.532219 | -2.223122 |
| C | 1.394643 | 0.054972  | -3.433268 |
| H | 0.703900 | -0.692287 | -2.999226 |
| H | 0.805836 | 0.954737  | -3.686508 |
| H | 1.803257 | -0.368860 | -4.368073 |

**TS-(1a·BF<sub>3</sub>-VIII)·2Et<sub>2</sub>O**

|   |          |           |           |
|---|----------|-----------|-----------|
| C | 3.981840 | -1.825269 | 1.274446  |
| C | 2.920960 | -0.960702 | 1.494490  |
| C | 2.780581 | 0.203843  | 0.718465  |
| C | 3.746518 | 0.472607  | -0.281122 |
| C | 4.817961 | -0.415230 | -0.478071 |
| C | 4.940100 | -1.561739 | 0.286703  |
| H | 4.063205 | -2.731915 | 1.885044  |
| H | 2.186765 | -1.200571 | 2.265462  |
| C | 3.594913 | 1.660530  | -1.071332 |
| H | 5.551365 | -0.180652 | -1.259587 |
| H | 5.772937 | -2.254070 | 0.122972  |
| C | 2.499108 | 2.442602  | -0.936591 |
| C | 1.461851 | 2.076886  | -0.006762 |

|    |           |           |           |
|----|-----------|-----------|-----------|
| H  | 4.385731  | 1.919918  | -1.786004 |
| H  | 2.366525  | 3.347204  | -1.537592 |
| N  | 1.725399  | 1.099273  | 0.908764  |
| B  | 0.693142  | 0.904343  | 2.053908  |
| F  | -0.143274 | -0.226009 | 1.586208  |
| F  | 1.249784  | 0.564917  | 3.246224  |
| F  | -0.134601 | 1.992139  | 2.149088  |
| H  | 0.791634  | 2.860108  | 0.356059  |
| C  | -0.066150 | 1.779421  | -1.670169 |
| H  | 0.678873  | 1.317872  | -2.341055 |
| H  | -1.029596 | 1.272549  | -1.959489 |
| C  | -0.275899 | 3.260380  | -1.976367 |
| H  | 0.039518  | 3.940736  | -1.153417 |
| H  | 0.286604  | 3.591098  | -2.871279 |
| H  | -1.334861 | 3.510727  | -2.175787 |
| Mg | -0.771904 | -0.054262 | -0.327621 |
| Br | 0.777189  | -1.595607 | -1.619783 |
| O  | -2.412499 | 1.037222  | 0.502199  |
| O  | -2.152481 | -1.700115 | -0.226553 |
| C  | -2.677242 | 2.427288  | 0.271698  |
| H  | -3.082797 | 2.861423  | 1.205158  |
| H  | -1.703055 | 2.914503  | 0.091894  |
| C  | -3.616547 | 2.647598  | -0.888644 |
| H  | -4.600216 | 2.174029  | -0.718685 |
| H  | -3.778823 | 3.730624  | -1.039307 |
| H  | -3.199064 | 2.238555  | -1.827900 |
| C  | -3.076004 | 0.487675  | 1.647580  |
| H  | -2.878740 | 1.153670  | 2.510755  |
| H  | -2.577463 | -0.469302 | 1.863473  |

|   |           |           |           |
|---|-----------|-----------|-----------|
| C | -4.552148 | 0.273535  | 1.428838  |
| H | -4.987080 | -0.237129 | 2.307278  |
| H | -5.100308 | 1.223869  | 1.294999  |
| H | -4.727300 | -0.363308 | 0.541037  |
| C | -1.788794 | -2.792304 | 0.628278  |
| H | -1.114524 | -2.362630 | 1.389131  |
| H | -1.193120 | -3.513796 | 0.033591  |
| C | -2.978936 | -3.449816 | 1.284709  |
| H | -2.625584 | -4.177721 | 2.036243  |
| H | -3.608763 | -2.702876 | 1.803690  |
| H | -3.611291 | -4.001583 | 0.566777  |
| C | -2.876468 | -2.104034 | -1.388853 |
| H | -3.866503 | -2.490416 | -1.078151 |
| H | -2.321083 | -2.931955 | -1.876488 |
| C | -3.040086 | -0.939839 | -2.327304 |
| H | -3.646880 | -1.242050 | -3.198114 |
| H | -3.556547 | -0.095598 | -1.833927 |
| H | -2.062534 | -0.597408 | -2.722592 |

### VIII·2Et<sub>2</sub>O

|   |          |          |           |
|---|----------|----------|-----------|
| C | 1.810446 | 3.298571 | 0.447981  |
| C | 1.755039 | 1.997109 | 0.941657  |
| C | 2.310674 | 0.920876 | 0.223871  |
| C | 2.948145 | 1.213238 | -1.013385 |
| C | 2.990798 | 2.529067 | -1.488570 |
| C | 2.425009 | 3.579598 | -0.773079 |
| H | 1.371567 | 4.109401 | 1.042424  |
| H | 1.292799 | 1.816030 | 1.914681  |

|    |           |           |           |
|----|-----------|-----------|-----------|
| C  | 3.476962  | 0.108008  | -1.797851 |
| H  | 3.480433  | 2.716248  | -2.453904 |
| H  | 2.470485  | 4.605266  | -1.155945 |
| C  | 3.589792  | -1.116369 | -1.263980 |
| C  | 3.276072  | -1.334489 | 0.189322  |
| H  | 3.758384  | 0.304151  | -2.841725 |
| H  | 3.966225  | -1.962048 | -1.853302 |
| N  | 2.244950  | -0.399829 | 0.662519  |
| B  | 1.138645  | -1.032112 | 1.425540  |
| F  | 0.252888  | -0.101422 | 2.059767  |
| F  | 0.125122  | -1.652483 | 0.487728  |
| F  | 1.516750  | -2.013645 | 2.286439  |
| H  | 2.868649  | -2.358391 | 0.306882  |
| Mg | -1.363513 | -0.248958 | 0.691505  |
| Br | -2.760070 | 1.410669  | 1.910288  |
| O  | -0.833459 | 0.679117  | -1.077048 |
| C  | -1.150086 | 2.063796  | -1.318566 |
| H  | -0.957279 | 2.597848  | -0.369981 |
| H  | -0.423857 | 2.448552  | -2.060195 |
| C  | -2.578100 | 2.253911  | -1.765422 |
| H  | -2.776572 | 3.328720  | -1.929655 |
| H  | -2.794328 | 1.718272  | -2.707096 |
| H  | -3.277420 | 1.900835  | -0.984621 |
| C  | -0.087140 | 0.027552  | -2.116939 |
| H  | 0.797162  | 0.656202  | -2.339761 |
| H  | 0.295811  | -0.903448 | -1.666276 |
| C  | -0.901269 | -0.250950 | -3.354483 |
| H  | -0.303965 | -0.861280 | -4.055916 |
| H  | -1.819529 | -0.817191 | -3.108355 |

|   |           |           |           |
|---|-----------|-----------|-----------|
| H | -1.189643 | 0.674524  | -3.884996 |
| C | 4.537199  | -1.245015 | 1.058142  |
| H | 4.927091  | -0.207456 | 0.995822  |
| H | 4.227247  | -1.403823 | 2.109970  |
| C | 5.617746  | -2.238490 | 0.672100  |
| H | 6.465100  | -2.206393 | 1.380509  |
| H | 5.225847  | -3.274965 | 0.669640  |
| H | 6.025152  | -2.034185 | -0.336101 |
| O | -2.731718 | -1.636385 | -0.016496 |
| C | -4.110477 | -1.270365 | -0.190982 |
| H | -4.179848 | -0.220965 | 0.146725  |
| H | -4.716502 | -1.877973 | 0.509946  |
| C | -4.590796 | -1.421936 | -1.611187 |
| H | -5.626187 | -1.044769 | -1.689311 |
| H | -3.961926 | -0.836744 | -2.308318 |
| H | -4.598754 | -2.476327 | -1.942542 |
| C | -2.443114 | -3.042111 | -0.131785 |
| H | -1.779415 | -3.301584 | 0.710978  |
| H | -3.390382 | -3.594432 | 0.014953  |
| C | -1.793255 | -3.387491 | -1.447387 |
| H | -0.841934 | -2.838791 | -1.569328 |
| H | -1.562848 | -4.467797 | -1.476196 |
| H | -2.448125 | -3.155016 | -2.306285 |

**TS-(1a·BF<sub>3</sub>-IX)·2Et<sub>2</sub>O**

|   |          |           |           |
|---|----------|-----------|-----------|
| C | 4.422906 | 1.139177  | -0.714511 |
| C | 3.591722 | 0.106321  | -1.119890 |
| C | 2.946060 | -0.693221 | -0.159776 |

|    |           |           |           |
|----|-----------|-----------|-----------|
| C  | 3.155024  | -0.429603 | 1.214869  |
| C  | 3.985765  | 0.637489  | 1.601163  |
| C  | 4.621867  | 1.413211  | 0.647637  |
| H  | 4.933422  | 1.744753  | -1.472078 |
| H  | 3.442046  | -0.103295 | -2.181419 |
| C  | 2.431082  | -1.239871 | 2.156530  |
| H  | 4.123615  | 0.836367  | 2.671114  |
| H  | 5.278928  | 2.234754  | 0.953364  |
| C  | 2.069072  | -2.542312 | 1.729195  |
| C  | 1.832177  | -2.707407 | 0.386502  |
| H  | 2.528561  | -1.014092 | 3.224830  |
| H  | 1.821326  | -3.338144 | 2.437327  |
| N  | 2.087594  | -1.731647 | -0.524819 |
| B  | 1.073208  | -1.531015 | -1.715917 |
| F  | 0.267753  | -0.383414 | -1.329765 |
| F  | 1.693047  | -1.238129 | -2.900873 |
| F  | 0.265817  | -2.633768 | -1.810500 |
| H  | 1.343094  | -3.604808 | -0.007861 |
| C  | 0.335668  | -0.088999 | 1.969937  |
| H  | 0.885971  | 0.849064  | 2.132942  |
| H  | 0.657260  | -0.688336 | 1.114443  |
| C  | -0.388188 | -0.732308 | 3.121324  |
| H  | -1.491106 | -0.585061 | 3.123090  |
| H  | -0.224395 | -1.831767 | 3.144915  |
| H  | -0.029494 | -0.339647 | 4.093614  |
| Mg | -1.058521 | 0.479339  | 0.242890  |
| Br | -3.118432 | 1.651102  | 1.166593  |
| O  | -2.138006 | -1.248571 | -0.225242 |
| O  | -0.311019 | 2.220855  | -0.628541 |

|   |           |           |           |
|---|-----------|-----------|-----------|
| C | 1.071619  | 2.563656  | -0.518374 |
| H | 1.592027  | 1.655769  | -0.165029 |
| H | 1.470138  | 2.780783  | -1.530255 |
| C | -1.060639 | 2.974702  | -1.588417 |
| H | -2.068832 | 3.106906  | -1.155562 |
| H | -0.603641 | 3.978123  | -1.679609 |
| C | -1.108913 | 2.259201  | -2.915724 |
| H | -1.622577 | 1.282879  | -2.819654 |
| H | -1.658690 | 2.861937  | -3.660623 |
| H | -0.092029 | 2.066953  | -3.305863 |
| C | 1.279915  | 3.709961  | 0.438945  |
| H | 2.356438  | 3.942817  | 0.528889  |
| H | 0.761218  | 4.626435  | 0.102206  |
| H | 0.894178  | 3.445936  | 1.441792  |
| C | -1.946001 | -2.501175 | 0.431260  |
| H | -1.713160 | -3.275479 | -0.324015 |
| H | -1.030316 | -2.368462 | 1.036235  |
| C | -3.114676 | -2.885653 | 1.305435  |
| H | -2.845335 | -3.757632 | 1.927788  |
| H | -3.389306 | -2.050319 | 1.977160  |
| H | -4.006982 | -3.165324 | 0.715718  |
| C | -3.224401 | -1.163190 | -1.150495 |
| H | -4.180907 | -1.267253 | -0.600827 |
| H | -3.196901 | -0.125083 | -1.527685 |
| C | -3.109684 | -2.146088 | -2.288369 |
| H | -3.871365 | -1.914975 | -3.053837 |
| H | -2.108839 | -2.082095 | -2.752372 |
| H | -3.275770 | -3.189558 | -1.963808 |



**IX·Et<sub>2</sub>O**

|   |           |           |           |
|---|-----------|-----------|-----------|
| C | 3.127318  | 2.088594  | 1.183433  |
| C | 1.816014  | 2.036869  | 0.724927  |
| C | 1.447203  | 1.168593  | -0.316440 |
| C | 2.425363  | 0.334172  | -0.888386 |
| C | 3.741892  | 0.423858  | -0.426367 |
| C | 4.106099  | 1.286340  | 0.601065  |
| H | 3.382861  | 2.775830  | 1.997915  |
| H | 1.071855  | 2.692284  | 1.185504  |
| C | 2.087804  | -0.699080 | -1.936836 |
| H | 4.499573  | -0.220346 | -0.892747 |
| H | 5.144731  | 1.330518  | 0.946837  |
| C | 0.773941  | -0.369906 | -2.573477 |
| C | -0.120168 | 0.437782  | -1.995513 |
| H | 2.883611  | -0.681312 | -2.714078 |
| H | 0.514503  | -0.823536 | -3.537305 |
| N | 0.081016  | 1.102874  | -0.757607 |
| B | -0.871519 | 2.313933  | -0.473692 |
| F | -1.306136 | 2.044133  | 0.940706  |
| F | -0.284494 | 3.535685  | -0.512381 |
| F | -2.002728 | 2.239229  | -1.235264 |
| H | -1.094606 | 0.633759  | -2.454119 |
| C | 2.103491  | -2.115239 | -1.329624 |
| H | 3.093587  | -2.277239 | -0.857834 |
| H | 1.367513  | -2.152781 | -0.498344 |
| C | 1.833624  | -3.217152 | -2.337338 |
| H | 1.943914  | -4.215947 | -1.877115 |
| H | 0.810587  | -3.159821 | -2.755359 |

|    |           |           |           |
|----|-----------|-----------|-----------|
| H  | 2.541554  | -3.161031 | -3.187659 |
| Mg | -0.895800 | 0.078182  | 1.011830  |
| Br | 0.407864  | -1.441120 | 2.412734  |
| O  | -2.651440 | -0.604200 | 0.165864  |
| C  | -2.899748 | -1.842950 | -0.522287 |
| H  | -3.733170 | -2.352694 | 0.001833  |
| H  | -3.237029 | -1.604596 | -1.548506 |
| C  | -1.672136 | -2.708796 | -0.562173 |
| H  | -1.910709 | -3.648456 | -1.090753 |
| H  | -0.851299 | -2.217053 | -1.119952 |
| H  | -1.312425 | -2.967173 | 0.451273  |
| C  | -3.857818 | 0.130683  | 0.464596  |
| H  | -4.435068 | -0.461778 | 1.202495  |
| H  | -3.524030 | 1.058598  | 0.958549  |
| C  | -4.683469 | 0.455837  | -0.754053 |
| H  | -5.479518 | 1.165239  | -0.466913 |
| H  | -4.060078 | 0.936399  | -1.528046 |
| H  | -5.176216 | -0.433106 | -1.185253 |

**IIa-proR<sub>3,4</sub>**

|   |           |           |           |
|---|-----------|-----------|-----------|
| C | -3.749576 | 1.480906  | -0.386426 |
| C | -4.241072 | -0.192039 | 1.709189  |
| C | -5.197256 | 1.019228  | -0.204584 |
| H | -3.278605 | 0.756394  | -1.078028 |
| C | -5.101208 | -0.349665 | 0.454455  |
| H | -4.876484 | 0.271147  | 2.493340  |
| H | -5.755788 | 1.722587  | 0.447941  |
| H | -5.729881 | 0.984607  | -1.174201 |

|    |           |           |           |
|----|-----------|-----------|-----------|
| H  | -6.094057 | -0.779048 | 0.692575  |
| H  | -4.614474 | -1.042736 | -0.262097 |
| C  | 0.697834  | -2.199081 | 1.421722  |
| C  | 0.025830  | -3.154808 | -1.071093 |
| C  | 0.907973  | -3.694595 | 1.140774  |
| H  | -0.246160 | -2.096531 | 1.996519  |
| C  | -0.135637 | -4.106710 | 0.112343  |
| H  | 0.992790  | -3.374454 | -1.568634 |
| H  | 1.924323  | -3.867596 | 0.731932  |
| H  | 0.831099  | -4.274936 | 2.079820  |
| H  | -0.024051 | -5.160725 | -0.206060 |
| H  | -1.141736 | -4.006437 | 0.568380  |
| P  | 0.321555  | -1.476069 | -0.272308 |
| P  | -2.997324 | 1.224874  | 1.331217  |
| Cu | 1.983879  | -0.394065 | -1.373658 |
| C  | 2.819187  | 2.388853  | 0.184252  |
| C  | 0.872965  | 2.310353  | -1.122378 |
| C  | 3.472707  | 2.727000  | 1.387835  |
| C  | 3.568901  | 1.772715  | -0.860171 |
| C  | 1.533225  | 1.644227  | -2.178701 |
| H  | -0.187172 | 2.580467  | -1.213392 |
| C  | 4.819909  | 2.469208  | 1.532682  |
| H  | 2.912255  | 3.187755  | 2.202340  |
| C  | 4.946516  | 1.519402  | -0.677968 |
| C  | 2.904108  | 1.411318  | -2.072653 |
| H  | 0.985585  | 1.451218  | -3.107295 |
| C  | 5.566072  | 1.867085  | 0.500593  |
| H  | 5.314728  | 2.735456  | 2.473250  |
| H  | 5.498398  | 1.032363  | -1.489926 |

|    |           |           |           |
|----|-----------|-----------|-----------|
| H  | 3.494637  | 1.067891  | -2.929093 |
| H  | 6.634364  | 1.671773  | 0.640944  |
| N  | 1.477516  | 2.679821  | -0.010376 |
| B  | 0.603586  | 3.485849  | 1.142612  |
| F  | 0.603838  | 2.687809  | 2.260637  |
| F  | -0.654774 | 3.644347  | 0.620485  |
| F  | 1.240808  | 4.681580  | 1.347066  |
| Br | 3.595442  | -1.920635 | -2.199005 |
| C  | -3.633913 | -1.431958 | 2.305407  |
| C  | -3.835382 | -2.708988 | 1.765386  |
| C  | -2.827125 | -1.326942 | 3.450597  |
| C  | -3.227619 | -3.833649 | 2.327746  |
| H  | -4.481179 | -2.839469 | 0.888652  |
| C  | -2.213561 | -2.444888 | 4.010009  |
| H  | -2.673699 | -0.339448 | 3.909066  |
| C  | -2.404498 | -3.707548 | 3.444658  |
| H  | -3.403922 | -4.821083 | 1.883165  |
| H  | -1.582839 | -2.330291 | 4.899975  |
| H  | -1.923229 | -4.589725 | 3.882451  |
| C  | -3.514169 | 2.857080  | -0.931073 |
| C  | -2.736722 | 3.030792  | -2.082528 |
| C  | -4.030350 | 3.997513  | -0.301442 |
| C  | -2.470767 | 4.303898  | -2.588326 |
| H  | -2.335014 | 2.144732  | -2.596266 |
| C  | -3.773657 | 5.269346  | -0.806299 |
| H  | -4.630494 | 3.887283  | 0.611611  |
| C  | -2.988763 | 5.428894  | -1.950133 |
| H  | -1.857579 | 4.415817  | -3.490646 |
| H  | -4.184425 | 6.149119  | -0.296972 |

|   |           |           |           |
|---|-----------|-----------|-----------|
| H | -2.782800 | 6.431372  | -2.342729 |
| C | 1.798608  | -1.492354 | 2.160400  |
| C | 1.518778  | -0.765736 | 3.322947  |
| C | 3.124357  | -1.537148 | 1.703404  |
| C | 2.532814  | -0.110902 | 4.022470  |
| H | 0.485830  | -0.719944 | 3.694388  |
| C | 4.139012  | -0.888893 | 2.403519  |
| H | 3.371136  | -2.081485 | 0.780990  |
| C | 3.847773  | -0.175638 | 3.567528  |
| H | 2.290094  | 0.450393  | 4.932201  |
| H | 5.169753  | -0.940362 | 2.032191  |
| H | 4.648275  | 0.333910  | 4.117174  |
| C | -1.052764 | -3.061426 | -2.109395 |
| C | -2.376440 | -3.443462 | -1.864201 |
| C | -0.747517 | -2.470388 | -3.345176 |
| C | -3.372107 | -3.215895 | -2.815629 |
| H | -2.645452 | -3.922058 | -0.914391 |
| C | -1.739602 | -2.240170 | -4.294424 |
| H | 0.292846  | -2.183703 | -3.556337 |
| C | -3.060638 | -2.605928 | -4.029273 |
| H | -4.403564 | -3.521278 | -2.602573 |
| H | -1.479570 | -1.774845 | -5.252398 |
| H | -3.844177 | -2.424372 | -4.773735 |
| C | -1.366512 | -0.758004 | -0.086535 |
| H | -2.061287 | -1.573609 | 0.195322  |
| H | -1.664494 | -0.408050 | -1.095604 |
| C | -1.389562 | 0.366545  | 0.930494  |
| H | -0.993702 | 0.028043  | 1.908507  |
| H | -0.717040 | 1.190996  | 0.631148  |

**II-proR<sub>3,4</sub>**

|    |           |           |           |
|----|-----------|-----------|-----------|
| C  | 3.256710  | 2.111440  | 0.009200  |
| C  | 3.972726  | 0.398742  | -1.980197 |
| C  | 4.752642  | 2.022392  | -0.295454 |
| H  | 3.057508  | 1.340111  | 0.776996  |
| C  | 4.956666  | 0.608616  | -0.826805 |
| H  | 4.403762  | 0.880365  | -2.882738 |
| H  | 5.049167  | 2.771150  | -1.059644 |
| H  | 5.359241  | 2.222719  | 0.608483  |
| H  | 6.000645  | 0.416140  | -1.142330 |
| H  | 4.734753  | -0.097828 | -0.001262 |
| C  | -0.378127 | -2.589261 | -0.982992 |
| C  | 0.661333  | -3.003227 | 1.536467  |
| C  | -0.213667 | -4.039066 | -0.503957 |
| H  | 0.476934  | -2.360563 | -1.652878 |
| C  | 0.956236  | -4.057721 | 0.470941  |
| H  | -0.176887 | -3.361752 | 2.168705  |
| H  | -1.135275 | -4.385511 | 0.006428  |
| H  | -0.051032 | -4.711959 | -1.367325 |
| H  | 1.114972  | -5.054759 | 0.924439  |
| H  | 1.880033  | -3.801351 | -0.086545 |
| P  | -0.078529 | -1.566364 | 0.566674  |
| P  | 2.468392  | 1.543030  | -1.611956 |
| Cu | -1.924330 | -0.764023 | 1.642709  |
| C  | -3.442020 | 1.610337  | -0.169548 |
| C  | -1.414347 | 2.045959  | 0.935521  |
| C  | -4.256066 | 1.706671  | -1.314377 |

|   |           |           |           |
|---|-----------|-----------|-----------|
| C | -3.960477 | 0.978909  | 0.994108  |
| C | -1.824151 | 1.386811  | 2.101531  |
| H | -0.433420 | 2.535270  | 0.893840  |
| C | -5.547825 | 1.211880  | -1.295272 |
| H | -3.866861 | 2.180853  | -2.217103 |
| C | -5.283312 | 0.497078  | 0.986646  |
| C | -3.116841 | 0.813269  | 2.155952  |
| H | -1.174615 | 1.428156  | 2.984166  |
| C | -6.073968 | 0.612837  | -0.140480 |
| H | -6.165953 | 1.296826  | -2.196234 |
| H | -5.669541 | 0.023874  | 1.897850  |
| H | -3.585921 | 0.553610  | 3.112647  |
| H | -7.102740 | 0.236762  | -0.134441 |
| N | -2.162647 | 2.165569  | -0.152305 |
| B | -1.557900 | 2.965012  | -1.433832 |
| F | -1.452015 | 2.064206  | -2.473371 |
| F | -0.320843 | 3.441268  | -1.052870 |
| F | -2.426708 | 3.990289  | -1.732293 |
| C | -3.107161 | -2.165313 | 2.436440  |
| H | -4.131643 | -2.010612 | 2.034890  |
| H | -2.753707 | -3.143966 | 2.044901  |
| C | -3.106389 | -2.187599 | 3.953771  |
| H | -3.449957 | -1.228916 | 4.394662  |
| H | -3.764355 | -2.975635 | 4.383423  |
| H | -2.092925 | -2.374873 | 4.364328  |
| C | 3.619489  | -1.013263 | -2.358180 |
| C | 4.122734  | -2.133295 | -1.683572 |
| C | 2.739716  | -1.238533 | -3.430427 |
| C | 3.736607  | -3.426251 | -2.044497 |

|   |           |           |           |
|---|-----------|-----------|-----------|
| H | 4.835144  | -2.005763 | -0.859695 |
| C | 2.345221  | -2.525142 | -3.787574 |
| H | 2.350487  | -0.377574 | -3.992731 |
| C | 2.836713  | -3.629824 | -3.088316 |
| H | 4.149367  | -4.284218 | -1.499123 |
| H | 1.651041  | -2.668178 | -4.624590 |
| H | 2.529611  | -4.644449 | -3.367394 |
| C | 2.690501  | 3.405587  | 0.506940  |
| C | 1.932478  | 3.424164  | 1.684646  |
| C | 2.859518  | 4.607781  | -0.192495 |
| C | 1.347862  | 4.603395  | 2.147375  |
| H | 1.799152  | 2.490177  | 2.251701  |
| C | 2.285253  | 5.788631  | 0.270274  |
| H | 3.437758  | 4.614495  | -1.126022 |
| C | 1.521893  | 5.790961  | 1.439706  |
| H | 0.753815  | 4.592731  | 3.069440  |
| H | 2.426941  | 6.718773  | -0.292656 |
| H | 1.064343  | 6.720317  | 1.798123  |
| C | -1.658343 | -2.237866 | -1.688067 |
| C | -1.631968 | -1.582271 | -2.923800 |
| C | -2.905679 | -2.524274 | -1.113920 |
| C | -2.813959 | -1.223739 | -3.572480 |
| H | -0.665131 | -1.348632 | -3.390312 |
| C | -4.087359 | -2.168217 | -1.758938 |
| H | -2.958662 | -3.032770 | -0.143142 |
| C | -4.046045 | -1.515357 | -2.991795 |
| H | -2.767443 | -0.709228 | -4.539272 |
| H | -5.051536 | -2.399481 | -1.289821 |
| H | -4.976743 | -1.230966 | -3.497006 |



|   |          |           |           |
|---|----------|-----------|-----------|
| C | 1.766531 | -2.507523 | 2.423128  |
| C | 3.120325 | -2.668749 | 2.110113  |
| C | 1.431292 | -1.746746 | 3.554148  |
| C | 4.109410 | -2.063968 | 2.887802  |
| H | 3.418077 | -3.265608 | 1.239342  |
| C | 2.415121 | -1.139718 | 4.329451  |
| H | 0.370709 | -1.619717 | 3.817216  |
| C | 3.762085 | -1.290051 | 3.993175  |
| H | 5.164563 | -2.200943 | 2.622505  |
| H | 2.129528 | -0.545450 | 5.205196  |
| H | 4.539458 | -0.811298 | 4.599356  |
| C | 1.391478 | -0.536264 | 0.139111  |
| H | 2.242937 | -1.208672 | -0.086732 |
| H | 1.646568 | 0.012730  | 1.067481  |
| C | 1.113006 | 0.409950  | -1.011344 |
| H | 0.776756 | -0.141332 | -1.911569 |
| H | 0.277791 | 1.094674  | -0.774521 |

## X

|   |           |           |          |
|---|-----------|-----------|----------|
| C | 1.700844  | 1.723807  | 2.314339 |
| C | -0.715338 | 0.699387  | 3.136508 |
| C | 1.559178  | 1.342460  | 3.788659 |
| H | 1.537470  | 2.820439  | 2.229154 |
| C | 0.092444  | 1.507839  | 4.149471 |
| H | -0.558182 | -0.380349 | 3.338040 |
| H | 1.867858  | 0.284165  | 3.928662 |
| H | 2.211821  | 1.959044  | 4.435107 |
| H | -0.128441 | 1.187305  | 5.185855 |

|    |           |           |           |
|----|-----------|-----------|-----------|
| H  | -0.163070 | 2.584230  | 4.083784  |
| C  | -3.171796 | 0.166474  | -1.957749 |
| C  | -1.012507 | 1.525908  | -2.966324 |
| C  | -3.172370 | 0.505861  | -3.453728 |
| H  | -3.846728 | 0.880510  | -1.444185 |
| C  | -2.365030 | 1.780300  | -3.626125 |
| H  | -0.482682 | 0.763360  | -3.574380 |
| H  | -2.698726 | -0.315347 | -4.029089 |
| H  | -4.208074 | 0.602502  | -3.830390 |
| H  | -2.244554 | 2.070013  | -4.688204 |
| H  | -2.897660 | 2.612929  | -3.124634 |
| P  | -1.430528 | 0.604549  | -1.353171 |
| P  | 0.190043  | 0.937242  | 1.491023  |
| Cu | -0.002401 | -0.756756 | -0.090817 |
| Br | -0.888203 | -2.761882 | 1.019975  |
| C  | 2.783203  | -1.996392 | -0.467674 |
| C  | 1.725734  | -1.400850 | -2.433111 |
| C  | 2.781636  | -2.080924 | 0.946614  |
| C  | 3.915832  | -2.480733 | -1.187334 |
| C  | 2.804327  | -1.843581 | -3.227002 |
| H  | 0.830923  | -0.983463 | -2.917885 |
| C  | 3.858836  | -2.619773 | 1.609298  |
| H  | 1.894778  | -1.722057 | 1.482478  |
| C  | 5.010004  | -3.033782 | -0.474953 |
| C  | 3.900199  | -2.383454 | -2.598100 |
| H  | 2.748489  | -1.757504 | -4.316370 |
| C  | 4.982963  | -3.101664 | 0.897238  |
| H  | 3.847086  | -2.679364 | 2.703850  |
| H  | 5.872427  | -3.403944 | -1.042790 |

|   |           |           |           |
|---|-----------|-----------|-----------|
| H | 4.763301  | -2.746617 | -3.169761 |
| H | 5.829550  | -3.530686 | 1.444878  |
| N | 1.705895  | -1.460839 | -1.117198 |
| C | -3.602047 | -1.229817 | -1.615752 |
| C | -2.944555 | -2.345165 | -2.150214 |
| C | -4.680027 | -1.445602 | -0.751562 |
| C | -3.359958 | -3.636035 | -1.837937 |
| H | -2.075349 | -2.201637 | -2.808155 |
| C | -5.093463 | -2.737699 | -0.426960 |
| H | -5.206528 | -0.579664 | -0.327995 |
| C | -4.437854 | -3.838233 | -0.974906 |
| H | -2.827920 | -4.495571 | -2.262231 |
| H | -5.939593 | -2.883206 | 0.255799  |
| H | -4.760648 | -4.855358 | -0.724111 |
| C | -0.086008 | 2.689183  | -2.769750 |
| C | -0.543796 | 4.008043  | -2.648596 |
| C | 1.294831  | 2.460563  | -2.669500 |
| C | 0.345382  | 5.056661  | -2.412459 |
| H | -1.612209 | 4.233011  | -2.745726 |
| C | 2.185465  | 3.505552  | -2.436149 |
| H | 1.676976  | 1.434479  | -2.777264 |
| C | 1.712498  | 4.810628  | -2.298795 |
| H | -0.038223 | 6.079620  | -2.321519 |
| H | 3.259819  | 3.299694  | -2.359648 |
| H | 2.410348  | 5.635255  | -2.114312 |
| C | 3.013176  | 1.381911  | 1.656557  |
| C | 3.109506  | 1.313868  | 0.260629  |
| C | 4.171479  | 1.142564  | 2.405810  |
| C | 4.312908  | 1.007609  | -0.368595 |

|   |           |           |           |
|---|-----------|-----------|-----------|
| H | 2.213150  | 1.478119  | -0.352595 |
| C | 5.382083  | 0.842253  | 1.780184  |
| H | 4.137732  | 1.188688  | 3.500455  |
| C | 5.458692  | 0.770400  | 0.390843  |
| H | 4.352452  | 0.940871  | -1.464374 |
| H | 6.274590  | 0.657386  | 2.389933  |
| H | 6.407636  | 0.523431  | -0.099789 |
| C | -2.196337 | 0.945620  | 3.059519  |
| C | -2.773407 | 2.175583  | 3.403032  |
| C | -3.041088 | -0.075162 | 2.594686  |
| C | -4.147174 | 2.385132  | 3.275475  |
| H | -2.150149 | 2.994343  | 3.781741  |
| C | -4.413831 | 0.130670  | 2.478085  |
| H | -2.603946 | -1.042003 | 2.303044  |
| C | -4.974928 | 1.364196  | 2.812567  |
| H | -4.573420 | 3.357254  | 3.550609  |
| H | -5.053002 | -0.688611 | 2.126535  |
| H | -6.055460 | 1.525789  | 2.721756  |
| C | -0.635745 | 2.405748  | 0.698566  |
| H | 0.146292  | 2.898730  | 0.082937  |
| H | -0.948711 | 3.143074  | 1.465404  |
| C | -1.819927 | 1.993283  | -0.168094 |
| H | -2.638938 | 1.602956  | 0.469659  |
| H | -2.231945 | 2.863131  | -0.717351 |

## XI

|   |           |           |          |
|---|-----------|-----------|----------|
| C | 1.447519  | 0.565313  | 2.995279 |
| C | -0.858090 | -0.933801 | 2.981192 |

|    |           |           |           |
|----|-----------|-----------|-----------|
| C  | 1.299724  | -0.528328 | 4.053655  |
| H  | 1.203024  | 1.540598  | 3.468756  |
| C  | -0.188600 | -0.679138 | 4.330603  |
| H  | -0.537892 | -1.929583 | 2.622851  |
| H  | 1.694381  | -1.484556 | 3.655056  |
| H  | 1.873682  | -0.286736 | 4.968377  |
| H  | -0.404518 | -1.500112 | 5.041134  |
| H  | -0.566395 | 0.255626  | 4.792348  |
| C  | -3.230325 | 1.150769  | -1.695968 |
| C  | -1.365044 | 3.163338  | -1.609780 |
| C  | -3.382656 | 2.319008  | -2.683209 |
| H  | -3.997543 | 1.259379  | -0.903087 |
| C  | -2.777960 | 3.552999  | -2.035361 |
| H  | -0.777419 | 2.979462  | -2.533347 |
| H  | -2.838972 | 2.088393  | -3.621841 |
| H  | -4.444768 | 2.458973  | -2.958023 |
| H  | -2.766053 | 4.427745  | -2.714263 |
| H  | -3.390063 | 3.837703  | -1.156272 |
| P  | -1.571907 | 1.442050  | -0.837095 |
| P  | 0.026180  | 0.241749  | 1.793163  |
| Cu | 0.145671  | -0.112337 | -0.491989 |
| Br | -0.478083 | -2.591115 | -0.815730 |
| C  | 2.922718  | -0.659651 | -1.613963 |
| C  | 1.689005  | 0.869851  | -2.828006 |
| C  | 3.034549  | -1.531157 | -0.507847 |
| C  | 4.011735  | -0.557398 | -2.528748 |
| C  | 2.721073  | 1.051987  | -3.771046 |
| H  | 0.743416  | 1.416920  | -2.949803 |
| C  | 4.168575  | -2.286304 | -0.328911 |

|   |           |           |           |
|---|-----------|-----------|-----------|
| H | 2.198295  | -1.589473 | 0.194134  |
| C | 5.172671  | -1.343527 | -2.315263 |
| C | 3.882949  | 0.334063  | -3.618613 |
| H | 2.577191  | 1.746520  | -4.604002 |
| C | 5.247955  | -2.196629 | -1.239483 |
| H | 4.231650  | -2.961898 | 0.532478  |
| H | 6.002072  | -1.258010 | -3.027897 |
| H | 4.711096  | 0.434628  | -4.330955 |
| H | 6.144264  | -2.807223 | -1.083216 |
| N | 1.773509  | 0.062678  | -1.788719 |
| C | -3.355383 | -0.214844 | -2.308180 |
| C | -2.449858 | -0.655825 | -3.282743 |
| C | -4.386043 | -1.076292 | -1.920890 |
| C | -2.575458 | -1.917859 | -3.855959 |
| H | -1.618629 | -0.004133 | -3.588710 |
| C | -4.512645 | -2.344912 | -2.487767 |
| H | -5.103507 | -0.743462 | -1.158972 |
| C | -3.608815 | -2.768387 | -3.459622 |
| H | -1.853097 | -2.246122 | -4.612405 |
| H | -5.326541 | -3.005921 | -2.166643 |
| H | -3.704187 | -3.764902 | -3.905988 |
| C | -0.585880 | 4.105739  | -0.740174 |
| C | -1.199953 | 5.071295  | 0.067192  |
| C | 0.813020  | 4.000934  | -0.695819 |
| C | -0.442592 | 5.887986  | 0.907859  |
| H | -2.288350 | 5.200094  | 0.043003  |
| C | 1.571577  | 4.816050  | 0.140069  |
| H | 1.315684  | 3.257220  | -1.331649 |
| C | 0.944157  | 5.760562  | 0.953518  |

|   |           |           |           |
|---|-----------|-----------|-----------|
| H | -0.946271 | 6.635871  | 1.531288  |
| H | 2.663389  | 4.713931  | 0.157786  |
| H | 1.537673  | 6.402875  | 1.613893  |
| C | 2.782281  | 0.689045  | 2.309688  |
| C | 2.908585  | 1.531080  | 1.195668  |
| C | 3.918086  | -0.002279 | 2.743425  |
| C | 4.119196  | 1.668106  | 0.524281  |
| H | 2.028803  | 2.081086  | 0.832670  |
| C | 5.138170  | 0.139867  | 2.078965  |
| H | 3.860363  | -0.665249 | 3.614411  |
| C | 5.244318  | 0.970179  | 0.965982  |
| H | 4.180824  | 2.319184  | -0.358696 |
| H | 6.014940  | -0.413730 | 2.435970  |
| H | 6.200178  | 1.068965  | 0.438003  |
| C | -2.354881 | -0.867155 | 2.894344  |
| C | -3.132021 | -0.083754 | 3.756685  |
| C | -3.008195 | -1.589208 | 1.882791  |
| C | -4.516269 | -0.002572 | 3.597128  |
| H | -2.658962 | 0.475918  | 4.572567  |
| C | -4.389400 | -1.511204 | 1.724590  |
| H | -2.413449 | -2.221700 | 1.209281  |
| C | -5.150888 | -0.709853 | 2.577478  |
| H | -5.104381 | 0.617610  | 4.283981  |
| H | -4.875718 | -2.092315 | 0.931573  |
| H | -6.238759 | -0.649012 | 2.456686  |
| C | -0.960849 | 1.818119  | 1.902123  |
| H | -0.248718 | 2.644790  | 1.695036  |
| H | -1.336846 | 1.975371  | 2.932948  |
| C | -2.111815 | 1.839251  | 0.901603  |

|   |           |           |          |
|---|-----------|-----------|----------|
| H | -2.858533 | 1.062979  | 1.163070 |
| H | -2.641869 | 2.811687  | 0.929994 |
| B | 0.442980  | -3.805705 | 0.785590 |
| F | 1.185189  | -2.943343 | 1.548680 |
| F | 1.193822  | -4.720547 | 0.127835 |
| F | -0.616797 | -4.323061 | 1.458835 |

## L1

|   |           |           |           |
|---|-----------|-----------|-----------|
| C | 0.113218  | 0.752128  | 0.817374  |
| H | 0.668116  | 1.077342  | -0.086644 |
| H | 0.732942  | 1.049085  | 1.687866  |
| C | -0.113219 | -0.752125 | 0.817377  |
| H | -0.732941 | -1.049078 | 1.687871  |
| H | -0.668119 | -1.077343 | -0.086639 |
| C | -2.142644 | 1.380796  | -0.830573 |
| C | -0.990614 | 3.488527  | 0.581000  |
| C | -1.688243 | 2.593405  | -1.643497 |
| H | -1.623322 | 0.472943  | -1.193474 |
| C | -1.683613 | 3.824761  | -0.743731 |
| H | -1.449304 | 4.078642  | 1.396608  |
| H | -0.664401 | 2.397447  | -2.015343 |
| H | -2.313727 | 2.743539  | -2.544867 |
| H | -1.213506 | 4.699211  | -1.234892 |
| H | -2.728715 | 4.119464  | -0.524233 |
| C | 2.142644  | -1.380797 | -0.830569 |
| C | 0.990615  | -3.488525 | 0.581009  |
| C | 1.688241  | -2.593408 | -1.643489 |
| H | 1.623322  | -0.472944 | -1.193473 |



|   |           |           |           |
|---|-----------|-----------|-----------|
| C | 1.683616  | -3.824761 | -0.743721 |
| H | 1.449304  | -4.078638 | 1.396618  |
| H | 0.664398  | -2.397451 | -2.015332 |
| H | 2.313722  | -2.743542 | -2.544862 |
| H | 1.213514  | -4.699215 | -1.234879 |
| H | 2.728720  | -4.119458 | -0.524221 |
| P | -1.507714 | 1.671371  | 0.946419  |
| P | 1.507713  | -1.671368 | 0.946423  |
| C | 3.616759  | -1.066086 | -0.814272 |
| C | 4.024323  | 0.190646  | -0.337867 |
| C | 4.605931  | -1.959602 | -1.237210 |
| C | 5.368422  | 0.544522  | -0.291197 |
| H | 3.262750  | 0.909082  | 0.002746  |
| C | 5.957698  | -1.610009 | -1.186878 |
| H | 4.330361  | -2.948687 | -1.622384 |
| C | 6.345864  | -0.358709 | -0.715704 |
| H | 5.656585  | 1.535840  | 0.079520  |
| H | 6.713913  | -2.328558 | -1.524875 |
| H | 7.406642  | -0.084874 | -0.679259 |
| C | -0.495491 | -3.703889 | 0.654846  |
| C | -1.102957 | -3.796034 | 1.917066  |
| C | -1.322484 | -3.771373 | -0.473635 |
| C | -2.482185 | -3.927327 | 2.050702  |
| H | -0.471055 | -3.751880 | 2.815404  |
| C | -2.705889 | -3.906992 | -0.344980 |
| H | -0.889897 | -3.720342 | -1.479623 |
| C | -3.293890 | -3.980137 | 0.916223  |
| H | -2.928099 | -3.994262 | 3.050060  |
| H | -3.329935 | -3.955157 | -1.245692 |

|   |           |           |           |
|---|-----------|-----------|-----------|
| H | -4.380299 | -4.087447 | 1.016679  |
| C | 0.495491  | 3.703891  | 0.654841  |
| C | 1.102953  | 3.796052  | 1.917061  |
| C | 1.322489  | 3.771358  | -0.473639 |
| C | 2.482181  | 3.927343  | 2.050701  |
| H | 0.471048  | 3.751912  | 2.815398  |
| C | 2.705894  | 3.906975  | -0.344981 |
| H | 0.889904  | 3.720312  | -1.479627 |
| C | 3.293890  | 3.980136  | 0.916223  |
| H | 2.928092  | 3.994292  | 3.050058  |
| H | 3.329943  | 3.955125  | -1.245691 |
| H | 4.380300  | 4.087444  | 1.016682  |
| C | -3.616759 | 1.066084  | -0.814275 |
| C | -4.024322 | -0.190652 | -0.337880 |
| C | -4.605933 | 1.959605  | -1.237199 |
| C | -5.368421 | -0.544528 | -0.291207 |
| H | -3.262748 | -0.909092 | 0.002723  |
| C | -5.957700 | 1.610011  | -1.186864 |
| H | -4.330365 | 2.948693  | -1.622365 |
| C | -6.345864 | 0.358708  | -0.715702 |
| H | -5.656582 | -1.535850 | 0.079501  |
| H | -6.713916 | 2.328565  | -1.524852 |
| H | -7.406642 | 0.084872  | -0.679254 |

## XII

|   |           |          |           |
|---|-----------|----------|-----------|
| C | -0.289933 | 0.855721 | 0.352409  |
| H | 0.008485  | 1.274939 | -0.630284 |
| H | 0.446699  | 1.217238 | 1.096094  |

|   |           |           |           |
|---|-----------|-----------|-----------|
| C | -0.300879 | -0.666829 | 0.326532  |
| H | -0.751846 | -1.073153 | 1.255338  |
| H | -0.889706 | -1.073579 | -0.520517 |
| C | -2.900890 | 1.232156  | -0.767137 |
| C | -1.779108 | 3.394607  | 0.588601  |
| C | -2.834231 | 2.566684  | -1.512398 |
| H | -2.329237 | 0.464358  | -1.323602 |
| C | -2.813368 | 3.705070  | -0.497022 |
| H | -2.097611 | 3.852192  | 1.544397  |
| H | -1.902749 | 2.584532  | -2.109925 |
| H | -3.663176 | 2.674572  | -2.238354 |
| H | -2.621053 | 4.686794  | -0.971733 |
| H | -3.808589 | 3.785659  | -0.016906 |
| C | 2.148126  | -0.893858 | -1.382116 |
| C | 1.325206  | -3.192336 | -0.002881 |
| C | 2.031175  | -2.192831 | -2.190672 |
| H | 1.505162  | -0.108931 | -1.824564 |
| C | 2.191834  | -3.391796 | -1.254949 |
| H | 1.825588  | -3.632756 | 0.880265  |
| H | 1.031326  | -2.217120 | -2.664911 |
| H | 2.763035  | -2.214550 | -3.019125 |
| H | 1.950399  | -4.346339 | -1.758129 |
| H | 3.247401  | -3.468445 | -0.930459 |
| P | -1.962786 | 1.504734  | 0.873523  |
| P | 1.397415  | -1.340980 | 0.265952  |
| C | 3.527641  | -0.310386 | -1.177831 |
| C | 3.629270  | 0.984688  | -0.650387 |
| C | 4.704381  | -1.009547 | -1.458809 |
| C | 4.870103  | 1.557001  | -0.392965 |

|   |           |           |           |
|---|-----------|-----------|-----------|
| H | 2.716039  | 1.556163  | -0.426111 |
| C | 5.951142  | -0.435714 | -1.203909 |
| H | 4.665213  | -2.019599 | -1.882839 |
| C | 6.039546  | 0.845596  | -0.666256 |
| H | 4.924219  | 2.568603  | 0.026464  |
| H | 6.862202  | -1.002380 | -1.428372 |
| H | 7.018958  | 1.292471  | -0.460842 |
| C | -0.095995 | -3.694686 | -0.036043 |
| C | -0.782147 | -3.830185 | 1.179889  |
| C | -0.782138 | -3.977605 | -1.221664 |
| C | -2.118707 | -4.217109 | 1.210906  |
| H | -0.252130 | -3.609438 | 2.117234  |
| C | -2.122254 | -4.368233 | -1.193219 |
| H | -0.274981 | -3.899183 | -2.190477 |
| C | -2.796966 | -4.484300 | 0.020216  |
| H | -2.634563 | -4.314131 | 2.173104  |
| H | -2.641383 | -4.585273 | -2.133870 |
| H | -3.849739 | -4.789355 | 0.040040  |
| C | -0.360490 | 3.828190  | 0.336270  |
| C | 0.541840  | 3.839408  | 1.412259  |
| C | 0.124781  | 4.191036  | -0.926065 |
| C | 1.879512  | 4.179101  | 1.235088  |
| H | 0.180102  | 3.561557  | 2.412489  |
| C | 1.464042  | 4.541972  | -1.107637 |
| H | -0.546394 | 4.214008  | -1.792481 |
| C | 2.348160  | 4.534817  | -0.031345 |
| H | 2.561016  | 4.172085  | 2.093903  |
| H | 1.816148  | 4.828194  | -2.105778 |
| H | 3.398070  | 4.815445  | -0.175867 |

|   |           |           |           |
|---|-----------|-----------|-----------|
| C | -4.265752 | 0.653574  | -0.493305 |
| C | -4.355169 | -0.695563 | -0.114628 |
| C | -5.450815 | 1.391484  | -0.576266 |
| C | -5.581251 | -1.287768 | 0.168698  |
| H | -3.435175 | -1.295489 | -0.041403 |
| C | -6.684228 | 0.801570  | -0.289683 |
| H | -5.426501 | 2.446522  | -0.874441 |
| C | -6.756492 | -0.537998 | 0.083454  |
| H | -5.619431 | -2.345262 | 0.457227  |
| H | -7.599130 | 1.401502  | -0.362584 |
| H | -7.725391 | -0.999360 | 0.306701  |
| B | 2.408293  | -0.975369 | 2.025379  |
| F | 1.595115  | -1.627064 | 2.933637  |
| F | 3.631147  | -1.577144 | 1.883415  |
| F | 2.479530  | 0.373369  | 2.256114  |

### XIII

|   |           |           |           |
|---|-----------|-----------|-----------|
| C | 0.066029  | -0.760918 | -0.313254 |
| H | -0.246465 | -1.216632 | -1.273661 |
| H | -0.562965 | -1.211896 | 0.479687  |
| C | -0.066100 | 0.760968  | -0.313025 |
| H | 0.562866  | 1.211727  | 0.480059  |
| H | 0.246471  | 1.216952  | -1.273285 |
| C | 2.842481  | -0.928854 | -1.397540 |
| C | 1.897478  | -3.118840 | 0.082149  |
| C | 2.999157  | -2.321084 | -2.025617 |
| H | 2.257394  | -0.269640 | -2.068259 |

|   |           |           |           |
|---|-----------|-----------|-----------|
| C | 3.030862  | -3.379185 | -0.921135 |
| H | 2.222085  | -3.395412 | 1.103436  |
| H | 2.133830  | -2.500341 | -2.692208 |
| H | 3.896901  | -2.369184 | -2.669158 |
| H | 2.974671  | -4.405288 | -1.328639 |
| H | 3.990945  | -3.313874 | -0.374314 |
| C | -2.842472 | 0.928993  | -1.397368 |
| C | -1.897399 | 3.118897  | 0.082400  |
| C | -2.999151 | 2.321265  | -2.025357 |
| H | -2.257317 | 0.269835  | -2.068090 |
| C | -3.030862 | 3.379276  | -0.920783 |
| H | -2.221875 | 3.395508  | 1.103721  |
| H | -2.133845 | 2.500579  | -2.691953 |
| H | -3.896902 | 2.369401  | -2.668882 |
| H | -2.974770 | 4.405422  | -1.328193 |
| H | -3.990904 | 3.313835  | -0.373902 |
| P | 1.778141  | -1.252459 | 0.097207  |
| P | -1.778198 | 1.252515  | 0.097440  |
| C | -4.095173 | 0.189126  | -0.987189 |
| C | -3.980596 | -1.163821 | -0.638191 |
| C | -5.351910 | 0.794150  | -0.906083 |
| C | -5.085985 | -1.889204 | -0.207476 |
| H | -2.998345 | -1.656740 | -0.692794 |
| C | -6.463860 | 0.067775  | -0.476185 |
| H | -5.482879 | 1.847471  | -1.179775 |
| C | -6.335591 | -1.272785 | -0.122493 |
| H | -4.970340 | -2.945128 | 0.064163  |
| H | -7.440800 | 0.561181  | -0.417101 |
| H | -7.208869 | -1.839755 | 0.219469  |

|   |           |           |           |
|---|-----------|-----------|-----------|
| C | -0.554066 | 3.755173  | -0.172909 |
| C | 0.384528  | 3.766482  | 0.869933  |
| C | -0.175120 | 4.273961  | -1.415010 |
| C | 1.670779  | 4.259455  | 0.673275  |
| H | 0.102344  | 3.355009  | 1.849402  |
| C | 1.113002  | 4.774973  | -1.613139 |
| H | -0.885522 | 4.295533  | -2.249974 |
| C | 2.041699  | 4.764085  | -0.574480 |
| H | 2.389313  | 4.244129  | 1.501087  |
| H | 1.390233  | 5.178291  | -2.593928 |
| H | 3.053365  | 5.154707  | -0.734707 |
| C | 0.554155  | -3.755203 | -0.172992 |
| C | -0.384270 | -3.766689 | 0.869998  |
| C | 0.175041  | -4.273891 | -1.415086 |
| C | -1.670516 | -4.259741 | 0.673503  |
| H | -0.101965 | -3.355308 | 1.849468  |
| C | -1.113076 | -4.774980 | -1.613054 |
| H | 0.885310  | -4.295315 | -2.250170 |
| C | -2.041604 | -4.764272 | -0.574238 |
| H | -2.388915 | -4.244564 | 1.501434  |
| H | -1.390438 | -5.178219 | -2.593838 |
| H | -3.053267 | -5.154959 | -0.734320 |
| C | 4.095153  | -0.189017 | -0.987222 |
| C | 3.980549  | 1.163920  | -0.638202 |
| C | 5.351876  | -0.794052 | -0.905998 |
| C | 5.085882  | 1.889280  | -0.207307 |
| H | 2.998316  | 1.656856  | -0.692966 |
| C | 6.463776  | -0.067701 | -0.475926 |
| H | 5.482864  | -1.847365 | -1.179711 |

|   |           |           |           |
|---|-----------|-----------|-----------|
| C | 6.335470  | 1.272842  | -0.122181 |
| H | 4.970205  | 2.945197  | 0.064348  |
| H | 7.440707  | -0.561114 | -0.416737 |
| H | 7.208708  | 1.839786  | 0.219924  |
| B | -2.307853 | 0.554851  | 1.974283  |
| F | -1.336735 | 1.146695  | 2.753446  |
| F | -3.561352 | 1.054969  | 2.202456  |
| F | -2.245739 | -0.814576 | 1.998461  |
| B | 2.307844  | -0.554905 | 1.974260  |
| F | 1.336686  | -1.146840 | 2.753288  |
| F | 3.561320  | -1.055141 | 2.202304  |
| F | 2.245795  | 0.814494  | 1.998606  |

**L1-CuBr BF<sub>3</sub>**

|   |           |           |           |
|---|-----------|-----------|-----------|
| C | -3.095730 | -1.587256 | 0.754479  |
| C | -0.772424 | -2.764736 | 1.623802  |
| C | -3.180174 | -2.554277 | 1.945284  |
| H | -3.424165 | -2.137310 | -0.151569 |
| C | -2.061824 | -3.568886 | 1.777199  |
| H | -0.557435 | -2.282105 | 2.598591  |
| H | -3.042596 | -1.987849 | 2.889761  |
| H | -4.181993 | -3.021228 | 1.992417  |
| H | -1.991993 | -4.273647 | 2.627733  |
| H | -2.260412 | -4.174351 | 0.870204  |
| C | 2.705698  | 0.162736  | -2.220907 |
| C | 0.267634  | 1.224205  | -2.857648 |
| C | 2.620327  | 1.097276  | -3.433766 |
| H | 2.817018  | -0.877850 | -2.594129 |



|    |           |           |           |
|----|-----------|-----------|-----------|
| C  | 1.220987  | 0.986009  | -4.022167 |
| H  | 0.422478  | 2.263169  | -2.498176 |
| H  | 2.787666  | 2.142956  | -3.106484 |
| H  | 3.407271  | 0.860903  | -4.174266 |
| H  | 1.051816  | 1.712123  | -4.840379 |
| H  | 1.076328  | -0.025015 | -4.453655 |
| P  | 0.975477  | 0.191523  | -1.457481 |
| P  | -1.248928 | -1.306367 | 0.521163  |
| Cu | -0.014247 | 0.612076  | 0.583039  |
| Br | -0.196785 | 2.711922  | 1.750669  |
| C  | -1.204599 | 1.003491  | -3.029536 |
| C  | -2.080682 | 1.544909  | -2.075352 |
| C  | -1.740263 | 0.233079  | -4.066524 |
| C  | -3.448978 | 1.304655  | -2.141569 |
| H  | -1.675842 | 2.165689  | -1.261663 |
| C  | -3.114214 | -0.009634 | -4.134639 |
| H  | -1.082500 | -0.188987 | -4.835872 |
| C  | -3.971048 | 0.516860  | -3.170223 |
| H  | -4.115599 | 1.733024  | -1.383208 |
| H  | -3.516060 | -0.616666 | -4.954442 |
| H  | -5.049357 | 0.323182  | -3.221154 |
| C  | 3.813564  | 0.430327  | -1.234561 |
| C  | 3.804745  | -0.219158 | 0.005865  |
| C  | 4.877338  | 1.292875  | -1.519288 |
| C  | 4.816555  | -0.014597 | 0.937159  |
| H  | 2.967975  | -0.884450 | 0.257819  |
| C  | 5.897207  | 1.500274  | -0.588559 |
| H  | 4.924372  | 1.814228  | -2.482207 |
| C  | 5.871879  | 0.849347  | 0.642619  |

|   |           |           |           |
|---|-----------|-----------|-----------|
| H | 4.770626  | -0.522253 | 1.908953  |
| H | 6.719836  | 2.182914  | -0.832299 |
| H | 6.669578  | 1.019363  | 1.374924  |
| C | -3.945905 | -0.356475 | 0.902263  |
| C | -5.202127 | -0.305648 | 0.287799  |
| C | -3.541639 | 0.730405  | 1.686844  |
| C | -6.030767 | 0.805043  | 0.440637  |
| H | -5.531213 | -1.151739 | -0.330770 |
| C | -4.361033 | 1.848286  | 1.832346  |
| H | -2.557559 | 0.715371  | 2.175252  |
| C | -5.609052 | 1.889914  | 1.209065  |
| H | -7.010359 | 0.826458  | -0.051475 |
| H | -4.018182 | 2.695113  | 2.438862  |
| H | -6.253755 | 2.768999  | 1.323705  |
| C | 0.470951  | -3.468939 | 1.165819  |
| C | 0.435925  | -4.619110 | 0.367544  |
| C | 1.722893  | -2.940227 | 1.513996  |
| C | 1.615749  | -5.214692 | -0.079509 |
| H | -0.523863 | -5.069848 | 0.088531  |
| C | 2.901874  | -3.535308 | 1.070892  |
| H | 1.767502  | -2.038022 | 2.141494  |
| C | 2.852865  | -4.674254 | 0.266400  |
| H | 1.564152  | -6.115505 | -0.702065 |
| H | 3.869573  | -3.105131 | 1.355889  |
| H | 3.779206  | -5.144469 | -0.082521 |
| C | 0.388816  | -1.549129 | -1.797760 |
| H | 0.415230  | -1.760109 | -2.885770 |
| H | 1.160059  | -2.200548 | -1.334080 |
| C | -0.988796 | -1.881626 | -1.228807 |

|   |           |           |           |
|---|-----------|-----------|-----------|
| H | -1.188193 | -2.969072 | -1.306994 |
| H | -1.780063 | -1.371798 | -1.815026 |
| B | 1.943801  | 2.080347  | 2.318719  |
| F | 2.121718  | 2.614156  | 3.537245  |
| F | 1.824604  | 0.720142  | 2.305766  |
| F | 2.682493  | 2.600532  | 1.329044  |

**Cu<sub>2</sub>Br<sub>2</sub>·(SMe<sub>2</sub>)<sub>2</sub>**

|    |           |           |           |
|----|-----------|-----------|-----------|
| Cu | -1.186680 | -0.074589 | -0.272952 |
| Br | 0.396508  | -1.889383 | -0.118612 |
| Br | -0.441304 | 2.229344  | -0.032088 |
| Cu | 1.199109  | 0.477401  | 0.033810  |
| S  | -3.428659 | -0.500968 | -0.423254 |
| S  | 3.492204  | 0.497582  | 0.193635  |
| C  | -4.073822 | 0.768413  | 0.700223  |
| H  | -5.145608 | 0.593623  | 0.898316  |
| H  | -3.502313 | 0.773412  | 1.644832  |
| H  | -3.941985 | 1.739061  | 0.193751  |
| C  | -3.542418 | -1.963018 | 0.644505  |
| H  | -3.012562 | -1.786514 | 1.596920  |
| H  | -4.599988 | -2.217280 | 0.832843  |
| H  | -3.050151 | -2.789846 | 0.105903  |
| C  | 3.905610  | -0.548550 | -1.230363 |
| H  | 3.751167  | 0.056302  | -2.139242 |
| H  | 4.964539  | -0.855035 | -1.169768 |
| H  | 3.243817  | -1.432627 | -1.255880 |
| C  | 3.734396  | -0.717601 | 1.518986  |
| H  | 4.795262  | -1.021725 | 1.552747  |

|   |          |           |          |
|---|----------|-----------|----------|
| H | 3.464243 | -0.227428 | 2.468966 |
| H | 3.081697 | -1.593412 | 1.354043 |

**L1<sub>2</sub>Cu<sub>2</sub>Br<sub>2</sub>**

|    |           |           |           |
|----|-----------|-----------|-----------|
| Cu | 1.616502  | -0.331108 | -0.047830 |
| C  | 3.826743  | 1.885101  | 0.938480  |
| H  | 4.808780  | 2.022463  | 1.432269  |
| H  | 3.675057  | 2.771856  | 0.291154  |
| C  | 2.708330  | 1.793608  | 1.972366  |
| H  | 2.832593  | 0.899739  | 2.615354  |
| H  | 2.707713  | 2.682934  | 2.634576  |
| C  | 5.225072  | -0.612414 | 0.603415  |
| C  | 4.844847  | 0.847027  | -1.697427 |
| C  | 6.486056  | 0.041215  | 0.012293  |
| H  | 5.180415  | -0.453471 | 1.699151  |
| C  | 6.240288  | 0.237622  | -1.479538 |
| H  | 4.328441  | 0.327638  | -2.528446 |
| H  | 6.663701  | 1.017713  | 0.506278  |
| H  | 7.382257  | -0.581051 | 0.204229  |
| H  | 7.030487  | 0.848867  | -1.954037 |
| H  | 6.277255  | -0.750314 | -1.976708 |
| C  | 0.772096  | 3.426097  | 0.603430  |
| C  | -0.251378 | 1.628373  | 2.489320  |
| C  | -0.220222 | 3.958002  | 1.654510  |
| H  | 1.746149  | 3.941740  | 0.731178  |
| C  | -1.128708 | 2.808272  | 2.071947  |
| H  | -0.785050 | 0.671921  | 2.321616  |

|   |           |           |           |
|---|-----------|-----------|-----------|
| H | 0.347330  | 4.333341  | 2.526959  |
| H | -0.810878 | 4.806833  | 1.262019  |
| H | -1.839248 | 3.094848  | 2.871482  |
| H | -1.746925 | 2.508203  | 1.199358  |
| P | 3.828399  | 0.372571  | -0.157293 |
| P | 1.060542  | 1.624844  | 1.123148  |
| C | 0.336717  | 3.682702  | -0.826400 |
| C | 0.136498  | 2.684162  | -1.780757 |
| C | 0.170382  | 5.016291  | -1.231914 |
| C | -0.225839 | 3.000268  | -3.092505 |
| H | 0.283576  | 1.631999  | -1.512840 |
| C | -0.203046 | 5.338426  | -2.533006 |
| H | 0.344497  | 5.824818  | -0.508640 |
| C | -0.406713 | 4.326929  | -3.474813 |
| H | -0.350999 | 2.189261  | -3.822429 |
| H | -0.326505 | 6.389986  | -2.819317 |
| H | -0.692350 | 4.576030  | -4.503693 |
| C | 0.238092  | 1.628945  | 3.917851  |
| C | 0.789054  | 0.450077  | 4.444280  |
| C | 0.128943  | 2.736117  | 4.769957  |
| C | 1.225048  | 0.382903  | 5.764077  |
| H | 0.889874  | -0.430713 | 3.791986  |
| C | 0.566030  | 2.670762  | 6.094186  |
| H | -0.318325 | 3.671325  | 4.416279  |
| C | 1.118318  | 1.496240  | 6.598137  |
| H | 1.650328  | -0.552977 | 6.145533  |
| H | 0.465446  | 3.552426  | 6.738308  |
| H | 1.459443  | 1.446085  | 7.638702  |
| C | 4.751753  | 2.321869  | -1.956331 |

|    |           |           |           |
|----|-----------|-----------|-----------|
| C  | 3.578260  | 2.825210  | -2.534903 |
| C  | 5.738192  | 3.229613  | -1.554697 |
| C  | 3.385338  | 4.195100  | -2.692063 |
| H  | 2.790107  | 2.124180  | -2.847932 |
| C  | 5.550002  | 4.602261  | -1.715779 |
| H  | 6.665972  | 2.867923  | -1.093635 |
| C  | 4.371500  | 5.091417  | -2.277889 |
| H  | 2.451760  | 4.562622  | -3.136481 |
| H  | 6.333920  | 5.297503  | -1.392538 |
| H  | 4.223603  | 6.170903  | -2.398307 |
| C  | 5.169324  | -2.094895 | 0.330500  |
| C  | 4.569471  | -2.645761 | -0.807521 |
| C  | 5.792214  | -2.963411 | 1.235523  |
| C  | 4.600506  | -4.020884 | -1.035931 |
| H  | 4.038309  | -2.001854 | -1.522517 |
| C  | 5.817045  | -4.338492 | 1.017026  |
| H  | 6.262735  | -2.546282 | 2.136375  |
| C  | 5.222695  | -4.873161 | -0.125848 |
| H  | 4.127658  | -4.427486 | -1.937152 |
| H  | 6.303785  | -4.997489 | 1.745741  |
| H  | 5.241193  | -5.954770 | -0.305352 |
| Br | 0.680908  | -1.001235 | -2.270413 |
| Br | 1.618640  | -1.991756 | 1.767302  |
| Cu | -0.887546 | -0.551406 | -0.474930 |
| P  | -2.112034 | -1.929539 | 0.896386  |
| P  | -2.960646 | 0.339206  | -1.423651 |
| C  | -3.866702 | -1.465958 | 0.485112  |
| C  | -2.176419 | -3.797351 | 0.575135  |
| C  | -2.028815 | -2.064039 | 2.784268  |

|   |           |           |           |
|---|-----------|-----------|-----------|
| C | -3.958966 | -1.184128 | -1.010215 |
| C | -4.352174 | 1.624827  | -1.196966 |
| C | -2.969237 | 0.414471  | -3.324716 |
| H | -4.567226 | -2.267444 | 0.792329  |
| H | -4.138512 | -0.565264 | 1.073708  |
| C | -2.357085 | -4.419112 | 1.967549  |
| H | -3.099800 | -3.941122 | -0.018511 |
| C | -1.033976 | -4.309876 | -0.263311 |
| C | -1.684790 | -3.541141 | 3.021148  |
| H | -1.158681 | -1.442456 | 3.074733  |
| C | -3.256576 | -1.520259 | 3.466560  |
| H | -3.557454 | -2.033522 | -1.598925 |
| H | -5.010244 | -1.051427 | -1.333739 |
| C | -4.867360 | 1.892209  | -2.624121 |
| H | -5.127733 | 1.081012  | -0.626846 |
| C | -4.031098 | 2.858092  | -0.396671 |
| C | -3.745322 | 1.698534  | -3.641127 |
| H | -1.902366 | 0.539981  | -3.589485 |
| C | -3.449471 | -0.851635 | -3.985899 |
| H | -3.441003 | -4.501102 | 2.176735  |
| H | -1.960900 | -5.452205 | 1.992158  |
| C | 0.162031  | -4.790675 | 0.281236  |
| C | -1.168844 | -4.302091 | -1.658292 |
| H | -1.954719 | -3.851263 | 4.048716  |
| H | -0.585621 | -3.638650 | 2.936192  |
| C | -3.374099 | -0.136854 | 3.670774  |
| C | -4.319555 | -2.333009 | 3.878342  |
| H | -5.690064 | 1.183507  | -2.835764 |
| H | -5.307612 | 2.905235  | -2.695339 |

|   |           |           |           |
|---|-----------|-----------|-----------|
| C | -4.530348 | 2.974207  | 0.909097  |
| C | -3.318514 | 3.941042  | -0.928235 |
| H | -4.133263 | 1.682810  | -4.677665 |
| H | -3.041143 | 2.552943  | -3.590208 |
| C | -2.549365 | -1.913365 | -4.167594 |
| C | -4.770732 | -1.031232 | -4.416014 |
| C | 1.190853  | -5.245974 | -0.547483 |
| H | 0.307695  | -4.807478 | 1.367568  |
| C | -0.143791 | -4.746771 | -2.486143 |
| H | -2.103436 | -3.935351 | -2.108558 |
| C | -4.516211 | 0.416971  | 4.243121  |
| H | -2.550143 | 0.522501  | 3.368000  |
| C | -5.465122 | -1.782686 | 4.454076  |
| H | -4.262651 | -3.420192 | 3.752997  |
| C | -4.351450 | 4.140895  | 1.650278  |
| H | -5.090407 | 2.135359  | 1.346607  |
| C | -3.144667 | 5.110825  | -0.191394 |
| H | -2.894285 | 3.887702  | -1.939834 |
| C | -2.960300 | -3.113018 | -4.745232 |
| H | -1.506084 | -1.794856 | -3.838330 |
| C | -5.183445 | -2.231867 | -4.993785 |
| H | -5.502667 | -0.222683 | -4.310152 |
| C | 1.043264  | -5.223305 | -1.932192 |
| H | 2.129226  | -5.601605 | -0.100700 |
| H | -0.269565 | -4.722409 | -3.575322 |
| C | -5.572923 | -0.405532 | 4.633993  |
| H | -4.575723 | 1.501709  | 4.391406  |
| H | -6.282645 | -2.443153 | 4.766197  |
| C | -3.665170 | 5.220348  | 1.097374  |



|   |           |           |           |
|---|-----------|-----------|-----------|
| H | -4.765646 | 4.213850  | 2.663084  |
| H | -2.593141 | 5.947909  | -0.636457 |
| C | -4.282192 | -3.281116 | -5.157150 |
| H | -2.237932 | -3.927038 | -4.883015 |
| H | -6.223511 | -2.343237 | -5.322313 |
| H | 1.854000  | -5.576297 | -2.580244 |
| H | -6.474018 | 0.025735  | 5.084827  |
| H | -3.533215 | 6.145386  | 1.670798  |
| H | -4.605539 | -4.224375 | -5.612094 |

### **L1<sub>2</sub>Cu<sub>2</sub>BrEt**

|    |           |           |           |
|----|-----------|-----------|-----------|
| Cu | -1.423738 | 0.448208  | -0.002935 |
| C  | -3.992458 | -1.523900 | 0.825392  |
| H  | -4.953108 | -1.518543 | 1.376918  |
| H  | -4.081269 | -2.321725 | 0.061260  |
| C  | -2.835543 | -1.845231 | 1.767667  |
| H  | -2.786842 | -1.117497 | 2.599983  |
| H  | -2.957569 | -2.857426 | 2.204100  |
| C  | -4.892757 | 1.239871  | 0.826681  |
| C  | -4.969676 | -0.067770 | -1.583480 |
| C  | -6.296633 | 0.845969  | 0.341245  |
| H  | -4.766763 | 1.023780  | 1.904598  |
| C  | -6.238609 | 0.704730  | -1.175805 |
| H  | -4.458029 | 0.467595  | -2.407042 |
| H  | -6.593562 | -0.114768 | 0.807936  |
| H  | -7.049798 | 1.595615  | 0.654794  |
| H  | -7.151708 | 0.229327  | -1.579559 |
| H  | -6.199331 | 1.714610  | -1.625827 |

|   |           |           |           |
|---|-----------|-----------|-----------|
| C | -1.210517 | -3.343756 | -0.091863 |
| C | 0.136695  | -2.221904 | 2.083905  |
| C | -0.249623 | -4.239560 | 0.712763  |
| H | -2.237677 | -3.757337 | -0.016564 |
| C | 0.828358  | -3.346496 | 1.314990  |
| H | 0.782511  | -1.324386 | 2.117002  |
| H | -0.819619 | -4.744329 | 1.515783  |
| H | 0.192143  | -5.033163 | 0.080872  |
| H | 1.540992  | -3.905674 | 1.952555  |
| H | 1.429807  | -2.904506 | 0.491163  |
| P | -3.752721 | 0.084949  | -0.107225 |
| P | -1.219383 | -1.708123 | 0.865417  |
| C | -0.875736 | -3.296981 | -1.571504 |
| C | -0.526563 | -2.145041 | -2.281717 |
| C | -0.950689 | -4.505895 | -2.282592 |
| C | -0.255491 | -2.203897 | -3.652371 |
| H | -0.466948 | -1.176338 | -1.763177 |
| C | -0.671264 | -4.571475 | -3.643626 |
| H | -1.246398 | -5.421341 | -1.751380 |
| C | -0.318708 | -3.412963 | -4.339886 |
| H | 0.001373  | -1.281857 | -4.191491 |
| H | -0.739902 | -5.531713 | -4.169151 |
| H | -0.104603 | -3.453326 | -5.414356 |
| C | -0.272728 | -2.536575 | 3.502340  |
| C | -0.627081 | -1.480525 | 4.357007  |
| C | -0.271950 | -3.833334 | 4.034002  |
| C | -0.981134 | -1.711991 | 5.683438  |
| H | -0.644015 | -0.455006 | 3.958155  |
| C | -0.627396 | -4.067719 | 5.363572  |

|    |           |           |           |
|----|-----------|-----------|-----------|
| H  | 0.024365  | -4.689494 | 3.418418  |
| C  | -0.986833 | -3.010152 | 6.195075  |
| H  | -1.253981 | -0.865670 | 6.325124  |
| H  | -0.615641 | -5.093511 | 5.751091  |
| H  | -1.264616 | -3.195142 | 7.239332  |
| C  | -5.134233 | -1.493307 | -2.020397 |
| C  | -4.140854 | -2.073462 | -2.821489 |
| C  | -6.197442 | -2.299789 | -1.595581 |
| C  | -4.197888 | -3.418655 | -3.178457 |
| H  | -3.297472 | -1.456605 | -3.164354 |
| C  | -6.258841 | -3.646525 | -1.952460 |
| H  | -6.987390 | -1.879018 | -0.960319 |
| C  | -5.257520 | -4.213816 | -2.740522 |
| H  | -3.403519 | -3.845372 | -3.802910 |
| H  | -7.099164 | -4.260251 | -1.606692 |
| H  | -5.306880 | -5.272962 | -3.018725 |
| C  | -4.610530 | 2.702880  | 0.589098  |
| C  | -4.117641 | 3.197343  | -0.625051 |
| C  | -4.928820 | 3.627796  | 1.592145  |
| C  | -3.972064 | 4.567859  | -0.839370 |
| H  | -3.826718 | 2.506988  | -1.427755 |
| C  | -4.779477 | 4.997595  | 1.386715  |
| H  | -5.302337 | 3.258695  | 2.556842  |
| C  | -4.307259 | 5.475163  | 0.163329  |
| H  | -3.586814 | 4.925006  | -1.802254 |
| H  | -5.034923 | 5.698963  | 2.189940  |
| H  | -4.190040 | 6.552914  | -0.003150 |
| C  | -0.585509 | 1.768014  | -1.441046 |
| Br | -1.580999 | 1.524922  | 2.407116  |

|    |          |           |           |
|----|----------|-----------|-----------|
| Cu | 0.915352 | 0.661781  | -0.466508 |
| P  | 2.365176 | 1.492565  | 1.154511  |
| P  | 2.823790 | -0.111464 | -1.708585 |
| C  | 4.044581 | 1.038092  | 0.495291  |
| C  | 2.604681 | 3.363202  | 1.361641  |
| C  | 2.365325 | 1.097926  | 3.006190  |
| C  | 3.999744 | 1.173692  | -1.025694 |
| C  | 4.094421 | -1.526355 | -1.829895 |
| C  | 2.770481 | 0.217935  | -3.583290 |
| H  | 4.833704 | 1.676295  | 0.940005  |
| H  | 4.276326 | -0.005093 | 0.794256  |
| C  | 2.827678 | 3.564120  | 2.871414  |
| H  | 3.540002 | 3.594286  | 0.817504  |
| C  | 1.509940 | 4.172496  | 0.720474  |
| C  | 2.127031 | 2.462233  | 3.664189  |
| H  | 1.464639 | 0.471636  | 3.157286  |
| C  | 3.569894 | 0.305016  | 3.433353  |
| H  | 3.638746 | 2.179211  | -1.325260 |
| H  | 5.005685 | 1.053219  | -1.473639 |
| C  | 4.596689 | -1.474258 | -3.285221 |
| H  | 4.913531 | -1.206789 | -1.159959 |
| C  | 3.659217 | -2.881127 | -1.344588 |
| C  | 3.488885 | -0.982415 | -4.211205 |
| H  | 1.695041 | 0.180372  | -3.839157 |
| C  | 3.266587 | 1.591973  | -3.939013 |
| H  | 3.916987 | 3.532987  | 3.068592  |
| H  | 2.482915 | 4.567377  | 3.187821  |
| C  | 0.262277 | 4.352073  | 1.327797  |
| C  | 1.719837 | 4.744808  | -0.541491 |

|   |           |           |           |
|---|-----------|-----------|-----------|
| H | 2.445152  | 2.453927  | 4.724395  |
| H | 1.033543  | 2.639005  | 3.665568  |
| C | 3.603954  | -1.074181 | 3.172021  |
| C | 4.686818  | 0.881813  | 4.049202  |
| H | 5.459620  | -0.782569 | -3.332839 |
| H | 4.976814  | -2.464739 | -3.601140 |
| C | 4.199318  | -3.377843 | -0.150038 |
| C | 2.784956  | -3.704431 | -2.066712 |
| H | 3.877804  | -0.732193 | -5.216843 |
| H | 2.748135  | -1.791957 | -4.363059 |
| C | 2.382524  | 2.677264  | -3.845181 |
| C | 4.590197  | 1.850822  | -4.316543 |
| C | -0.750209 | 5.063386  | 0.688183  |
| H | 0.046864  | 3.889757  | 2.297411  |
| C | 0.716687  | 5.476319  | -1.176183 |
| H | 2.694093  | 4.618975  | -1.037218 |
| C | 4.714972  | -1.846432 | 3.498553  |
| H | 2.740217  | -1.551507 | 2.688346  |
| C | 5.802171  | 0.110526  | 4.380153  |
| H | 4.695655  | 1.952550  | 4.284380  |
| C | 3.899987  | -4.662661 | 0.299615  |
| H | 4.885095  | -2.746261 | 0.433232  |
| C | 2.489506  | -4.992549 | -1.623246 |
| H | 2.320013  | -3.342747 | -2.993358 |
| C | 2.810726  | 3.978548  | -4.096887 |
| H | 1.335015  | 2.494465  | -3.567045 |
| C | 5.021072  | 3.152792  | -4.570535 |
| H | 5.308236  | 1.028053  | -4.415947 |
| C | -0.525868 | 5.635480  | -0.563494 |

|   |           |           |           |
|---|-----------|-----------|-----------|
| H | -1.734982 | 5.145207  | 1.167695  |
| H | 0.909109  | 5.926703  | -2.158037 |
| C | 5.824869  | -1.254845 | 4.103635  |
| H | 4.709240  | -2.922159 | 3.283365  |
| H | 6.663282  | 0.587130  | 4.863241  |
| C | 3.049742  | -5.480206 | -0.442631 |
| H | 4.344621  | -5.030816 | 1.232298  |
| H | 1.807521  | -5.618878 | -2.211363 |
| C | 4.136532  | 4.223922  | -4.454833 |
| H | 2.097800  | 4.808333  | -4.020103 |
| H | 6.062630  | 3.329512  | -4.863550 |
| H | -1.321361 | 6.202591  | -1.062578 |
| H | 6.701633  | -1.858496 | 4.364472  |
| H | 2.818349  | -6.495465 | -0.099270 |
| H | 4.476675  | 5.246580  | -4.653879 |
| H | 0.372546  | 2.347370  | -1.549285 |
| C | -1.103298 | 1.444694  | -2.838180 |
| H | -1.231141 | 2.535728  | -0.957912 |
| H | -1.271776 | 2.347077  | -3.468641 |
| H | -0.398978 | 0.796114  | -3.398738 |
| H | -2.063399 | 0.887846  | -2.813165 |

**L1<sub>2</sub>Cu<sub>2</sub>Et<sub>2</sub>**

|    |           |           |           |
|----|-----------|-----------|-----------|
| Cu | -1.173250 | 0.176221  | 0.276355  |
| C  | -4.431310 | 1.075991  | 0.086349  |
| H  | -5.207352 | 1.764263  | 0.475976  |
| H  | -4.707964 | 0.858856  | -0.963700 |
| C  | -4.395100 | -0.218067 | 0.889781  |

|   |           |           |           |
|---|-----------|-----------|-----------|
| H | -4.173039 | -0.012778 | 1.958062  |
| H | -5.379619 | -0.725136 | 0.862164  |
| C | -3.022824 | 3.192494  | 1.410899  |
| C | -2.883264 | 3.180036  | -1.346761 |
| C | -3.747822 | 4.341098  | 0.690364  |
| H | -3.685491 | 2.737907  | 2.174449  |
| C | -3.066044 | 4.540557  | -0.658171 |
| H | -1.891693 | 3.137558  | -1.836254 |
| H | -4.813607 | 4.071873  | 0.547525  |
| H | -3.732459 | 5.265231  | 1.301224  |
| H | -3.616776 | 5.252906  | -1.301012 |
| H | -2.067302 | 4.989893  | -0.490807 |
| C | -3.847940 | -2.122740 | -1.226969 |
| C | -3.160970 | -2.881822 | 1.325509  |
| C | -4.692335 | -3.259812 | -0.632334 |
| H | -4.502667 | -1.372401 | -1.712904 |
| C | -3.877084 | -3.937921 | 0.464609  |
| H | -2.106995 | -3.184136 | 1.475281  |
| H | -5.623153 | -2.831401 | -0.209209 |
| H | -5.003490 | -3.979724 | -1.415226 |
| H | -4.503661 | -4.607874 | 1.083711  |
| H | -3.111940 | -4.589572 | -0.000233 |
| P | -2.751425 | 1.899939  | 0.071226  |
| P | -3.026373 | -1.312403 | 0.255872  |
| C | -2.823551 | -2.583199 | -2.232602 |
| C | -1.627783 | -3.211816 | -1.854204 |
| C | -3.061462 | -2.392926 | -3.599707 |
| C | -0.719044 | -3.653465 | -2.812563 |
| H | -1.369955 | -3.346086 | -0.793509 |

|   |           |           |           |
|---|-----------|-----------|-----------|
| C | -2.142203 | -2.812783 | -4.560714 |
| H | -3.990742 | -1.898802 | -3.914416 |
| C | -0.966712 | -3.452954 | -4.170173 |
| H | 0.198424  | -4.157499 | -2.483043 |
| H | -2.349994 | -2.642681 | -5.623833 |
| H | -0.242974 | -3.790986 | -4.921122 |
| C | -3.734501 | -2.581121 | 2.679596  |
| C | -2.897146 | -2.034600 | 3.663501  |
| C | -5.089050 | -2.756102 | 2.987802  |
| C | -3.397392 | -1.659354 | 4.908044  |
| H | -1.832889 | -1.884528 | 3.431917  |
| C | -5.591937 | -2.387592 | 4.235663  |
| H | -5.773408 | -3.178151 | 2.240570  |
| C | -4.750838 | -1.833642 | 5.200073  |
| H | -2.721618 | -1.227334 | 5.656289  |
| H | -6.656566 | -2.532909 | 4.454524  |
| H | -5.148734 | -1.540910 | 6.178624  |
| C | -3.912690 | 2.768490  | -2.361003 |
| C | -3.609844 | 1.724037  | -3.248908 |
| C | -5.195999 | 3.324807  | -2.411447 |
| C | -4.559125 | 1.246373  | -4.148645 |
| H | -2.610587 | 1.268046  | -3.218051 |
| C | -6.149293 | 2.847227  | -3.312084 |
| H | -5.471137 | 4.141459  | -1.732847 |
| C | -5.838372 | 1.804226  | -4.182232 |
| H | -4.293837 | 0.433662  | -4.835922 |
| H | -7.148623 | 3.298145  | -3.330485 |
| H | -6.588185 | 1.430221  | -4.888826 |
| C | -1.755719 | 3.646348  | 2.086767  |



|    |           |           |           |
|----|-----------|-----------|-----------|
| C  | -0.523648 | 3.690605  | 1.426668  |
| C  | -1.808895 | 4.078278  | 3.419051  |
| C  | 0.617413  | 4.156459  | 2.077465  |
| H  | -0.426222 | 3.321896  | 0.394862  |
| C  | -0.668637 | 4.535412  | 4.076313  |
| H  | -2.768975 | 4.045914  | 3.952247  |
| C  | 0.553480  | 4.578002  | 3.403936  |
| H  | 1.565124  | 4.185240  | 1.526920  |
| H  | -0.734671 | 4.858941  | 5.121952  |
| H  | 1.455917  | 4.936575  | 3.914299  |
| Cu | 1.110323  | 0.322553  | -0.448956 |
| P  | 3.109136  | 1.258093  | 0.226655  |
| P  | 2.543906  | -2.051188 | -0.417272 |
| C  | 4.472462  | 0.082383  | -0.255498 |
| C  | 3.895168  | 2.846597  | -0.446813 |
| C  | 3.496420  | 1.720527  | 2.047248  |
| C  | 4.220980  | -1.378928 | 0.076879  |
| C  | 2.821720  | -3.807579 | 0.269585  |
| C  | 2.815420  | -2.625745 | -2.227360 |
| H  | 4.567367  | 0.215731  | -1.350339 |
| H  | 5.436120  | 0.398432  | 0.186861  |
| C  | 4.945032  | 3.191429  | 0.608315  |
| H  | 4.378923  | 2.548543  | -1.400451 |
| C  | 2.893053  | 3.937537  | -0.761883 |
| C  | 4.294333  | 3.037908  | 1.980714  |
| H  | 2.500265  | 1.901668  | 2.497679  |
| C  | 4.149414  | 0.595241  | 2.804114  |
| H  | 5.039999  | -1.994793 | -0.343929 |
| H  | 4.251413  | -1.521726 | 1.175289  |

|   |          |           |           |
|---|----------|-----------|-----------|
| C | 3.655654 | -4.523596 | -0.793097 |
| H | 3.420758 | -3.663713 | 1.190581  |
| C | 1.528251 | -4.461215 | 0.683597  |
| C | 3.164523 | -4.123942 | -2.182396 |
| H | 1.819715 | -2.491332 | -2.692075 |
| C | 3.766432 | -1.726584 | -2.962211 |
| H | 5.800872 | 2.497479  | 0.508896  |
| H | 5.372580 | 4.201137  | 0.466130  |
| C | 3.043331 | 5.260950  | -0.328422 |
| C | 1.786862 | 3.637610  | -1.570085 |
| H | 5.039891 | 3.093804  | 2.795807  |
| H | 3.600480 | 3.884479  | 2.148884  |
| C | 3.357864 | -0.351745 | 3.471074  |
| C | 5.541116 | 0.431812  | 2.846777  |
| H | 4.713603 | -4.220348 | -0.671701 |
| H | 3.640069 | -5.623033 | -0.655314 |
| C | 0.909382 | -4.026988 | 1.867606  |
| C | 0.919893 | -5.501482 | -0.028062 |
| H | 3.906130 | -4.386207 | -2.960625 |
| H | 2.257484 | -4.705105 | -2.437546 |
| C | 3.269752 | -0.556047 | -3.553842 |
| C | 5.142892 | -1.972920 | -3.043601 |
| C | 2.115432 | 6.243913  | -0.676386 |
| H | 3.894455 | 5.548392  | 0.298767  |
| C | 0.863900 | 4.616886  | -1.926954 |
| H | 1.643346 | 2.604646  | -1.911387 |
| C | 3.930872 | -1.441483 | 4.123661  |
| H | 2.267754 | -0.228163 | 3.475455  |
| C | 6.118556 | -0.656770 | 3.500029  |

|   |           |           |           |
|---|-----------|-----------|-----------|
| H | 6.197202  | 1.165743  | 2.361902  |
| C | -0.256374 | -4.624697 | 2.334284  |
| H | 1.364465  | -3.202070 | 2.435041  |
| C | -0.264476 | -6.088956 | 0.424984  |
| H | 1.376839  | -5.884957 | -0.947666 |
| C | 4.117411  | 0.356272  | -4.176621 |
| H | 2.190574  | -0.365116 | -3.510751 |
| C | 5.995930  | -1.064350 | -3.671793 |
| H | 5.565739  | -2.887563 | -2.607650 |
| C | 1.019708  | 5.928334  | -1.475971 |
| H | 2.256524  | 7.269761  | -0.316147 |
| H | 0.015883  | 4.351880  | -2.572561 |
| C | 5.316461  | -1.604978 | 4.133631  |
| H | 3.286967  | -2.165521 | 4.637382  |
| H | 7.209821  | -0.762068 | 3.514159  |
| C | -0.854109 | -5.660051 | 1.610697  |
| H | -0.708604 | -4.277468 | 3.272200  |
| H | -0.720082 | -6.901013 | -0.154419 |
| C | 5.490375  | 0.108150  | -4.232983 |
| H | 3.699821  | 1.265598  | -4.627283 |
| H | 7.070415  | -1.277254 | -3.722190 |
| H | 0.291660  | 6.700472  | -1.751026 |
| H | 5.770713  | -2.460956 | 4.645861  |
| H | -1.778472 | -6.126356 | 1.973164  |
| H | 6.163265  | 0.820710  | -4.723976 |
| C | -0.110396 | 0.098707  | -2.072875 |
| H | 0.240593  | -0.884887 | -2.460233 |
| H | -1.200074 | -0.093428 | -1.911150 |
| C | -0.012574 | 1.136665  | -3.186800 |

|   |           |           |           |
|---|-----------|-----------|-----------|
| H | -0.424553 | 2.119147  | -2.876459 |
| H | 1.032418  | 1.343868  | -3.498824 |
| H | -0.556567 | 0.852927  | -4.118849 |
| C | 0.031010  | -0.328475 | 1.848386  |
| H | -0.289335 | -1.383890 | 2.008590  |
| H | 1.135510  | -0.412954 | 1.756666  |
| C | -0.289162 | 0.509850  | 3.082540  |
| H | 0.123666  | 1.536331  | 2.992240  |
| H | -1.383159 | 0.643410  | 3.230459  |
| H | 0.101356  | 0.090458  | 4.043508  |

### **L1-CuEt<sub>2</sub>**

|    |           |           |           |
|----|-----------|-----------|-----------|
| Cu | -1.643595 | 0.812514  | -2.210233 |
| C  | 0.192403  | -0.343847 | 1.721937  |
| H  | -0.202872 | -0.263555 | 2.754727  |
| H  | 0.974197  | -1.127537 | 1.765997  |
| C  | 0.812466  | 0.987736  | 1.310996  |
| H  | 0.041601  | 1.784367  | 1.275835  |
| H  | 1.550860  | 1.301170  | 2.076587  |
| C  | -2.616422 | -0.205982 | 1.420700  |
| C  | -1.516794 | -2.708810 | 1.250322  |
| C  | -2.865194 | -1.119103 | 2.630909  |
| H  | -2.319481 | 0.807626  | 1.758984  |
| C  | -2.757600 | -2.557800 | 2.143325  |
| H  | -1.778158 | -3.302557 | 0.352651  |
| H  | -2.107873 | -0.918316 | 3.414459  |
| H  | -3.853227 | -0.914185 | 3.090680  |
| H  | -2.756248 | -3.282652 | 2.980499  |

|   |           |           |           |
|---|-----------|-----------|-----------|
| H | -3.656126 | -2.790357 | 1.538745  |
| C | 3.103120  | -0.163331 | 0.029125  |
| C | 2.667585  | 2.544277  | -0.382257 |
| C | 4.181122  | 0.790188  | 0.535661  |
| H | 2.779619  | -0.840427 | 0.845434  |
| C | 4.120045  | 2.059543  | -0.306120 |
| H | 2.480245  | 2.994417  | -1.375503 |
| H | 3.964988  | 1.031260  | 1.594754  |
| H | 5.190633  | 0.334278  | 0.530397  |
| H | 4.795461  | 2.850961  | 0.074032  |
| H | 4.465903  | 1.826135  | -1.332394 |
| P | -1.124746 | -0.952935 | 0.531317  |
| P | 1.599175  | 0.938804  | -0.390379 |
| C | 3.449078  | -1.038673 | -1.152449 |
| C | 2.462218  | -1.905891 | -1.651105 |
| C | 4.702965  | -1.054950 | -1.771737 |
| C | 2.719896  | -2.764790 | -2.713890 |
| H | 1.462353  | -1.895438 | -1.191376 |
| C | 4.964975  | -1.910636 | -2.845395 |
| H | 5.503634  | -0.394875 | -1.417402 |
| C | 3.978765  | -2.770748 | -3.319924 |
| H | 1.926818  | -3.429421 | -3.078847 |
| H | 5.956798  | -1.900313 | -3.313476 |
| H | 4.185472  | -3.440731 | -4.162716 |
| C | 2.221372  | 3.544589  | 0.646114  |
| C | 1.043355  | 4.270680  | 0.409603  |
| C | 2.895565  | 3.768138  | 1.852872  |
| C | 0.547504  | 5.172360  | 1.345897  |
| H | 0.495596  | 4.107000  | -0.528760 |

|   |           |           |           |
|---|-----------|-----------|-----------|
| C | 2.404587  | 4.676612  | 2.792876  |
| H | 3.823909  | 3.227764  | 2.075327  |
| C | 1.227303  | 5.380181  | 2.547785  |
| H | -0.378895 | 5.720185  | 1.133196  |
| H | 2.952999  | 4.833337  | 3.729714  |
| H | 0.841581  | 6.090724  | 3.288226  |
| C | -0.288228 | -3.320603 | 1.848091  |
| C | 0.690789  | -3.847653 | 0.990634  |
| C | -0.017408 | -3.307185 | 3.222287  |
| C | 1.908970  | -4.311199 | 1.480428  |
| H | 0.489998  | -3.878804 | -0.090291 |
| C | 1.196853  | -3.781885 | 3.718510  |
| H | -0.758996 | -2.903344 | 3.923301  |
| C | 2.170449  | -4.276731 | 2.851444  |
| H | 2.659938  | -4.704723 | 0.784210  |
| H | 1.386341  | -3.757470 | 4.798501  |
| H | 3.127452  | -4.641115 | 3.242666  |
| C | -3.848050 | -0.068666 | 0.559300  |
| C | -4.863023 | 0.805576  | 0.970660  |
| C | -4.039628 | -0.790068 | -0.622904 |
| C | -6.027197 | 0.965888  | 0.223077  |
| H | -4.724621 | 1.383912  | 1.895154  |
| C | -5.204546 | -0.636291 | -1.375578 |
| H | -3.257620 | -1.470753 | -0.984807 |
| C | -6.200957 | 0.244124  | -0.959328 |
| H | -6.802200 | 1.664449  | 0.561302  |
| H | -5.325997 | -1.205564 | -2.305529 |
| H | -7.112284 | 0.370820  | -1.555877 |
| C | -1.120958 | -0.655239 | -3.429256 |

|   |           |           |           |
|---|-----------|-----------|-----------|
| H | -0.003390 | -0.676375 | -3.420643 |
| H | -1.381480 | -0.422846 | -4.489771 |
| C | -1.623184 | -2.060857 | -3.113957 |
| H | -1.229001 | -2.868249 | -3.779775 |
| H | -1.361419 | -2.363678 | -2.075158 |
| H | -2.731145 | -2.132119 | -3.180442 |
| C | -2.082893 | 2.441466  | -1.184568 |
| C | -1.766837 | 3.730669  | -1.940354 |
| H | -3.159842 | 2.443459  | -0.891832 |
| H | -1.529852 | 2.452566  | -0.212677 |
| H | -1.930671 | 4.679181  | -1.367740 |
| H | -0.709132 | 3.759768  | -2.283773 |
| H | -2.372838 | 3.824571  | -2.866304 |

### **CuEt<sub>2</sub>**

|    |           |           |           |
|----|-----------|-----------|-----------|
| Cu | 0.000002  | 0.000008  | -0.075759 |
| C  | -1.842341 | -0.677331 | -0.070996 |
| H  | -1.957512 | -1.479895 | 0.695599  |
| H  | -2.074399 | -1.185931 | -1.036607 |
| C  | -2.904618 | 0.392549  | 0.182891  |
| H  | -3.958189 | 0.020250  | 0.188647  |
| H  | -2.755369 | 0.900347  | 1.159110  |
| H  | -2.870591 | 1.199000  | -0.579629 |
| C  | 1.842350  | 0.677336  | -0.070986 |
| C  | 2.904600  | -0.392573 | 0.182889  |
| H  | 2.074412  | 1.185902  | -1.036614 |
| H  | 1.957560  | 1.479914  | 0.695588  |
| H  | 3.958183  | -0.020307 | 0.188603  |

|   |          |           |           |
|---|----------|-----------|-----------|
| H | 2.755366 | -0.900344 | 1.159126  |
| H | 2.870523 | -1.199041 | -0.579610 |

**V-R<sub>3,4</sub>**

|    |           |           |           |
|----|-----------|-----------|-----------|
| C  | 1.934007  | -0.372031 | 2.794257  |
| C  | -0.410780 | -1.762060 | 2.583423  |
| C  | 1.815779  | -1.702387 | 3.550786  |
| H  | 1.756794  | 0.437052  | 3.535871  |
| C  | 0.349448  | -1.906062 | 3.893558  |
| H  | -0.115138 | -2.611323 | 1.931211  |
| H  | 2.178570  | -2.527745 | 2.902802  |
| H  | 2.444983  | -1.701333 | 4.459373  |
| H  | 0.156406  | -2.888099 | 4.366265  |
| H  | 0.035587  | -1.130248 | 4.620847  |
| C  | -3.696289 | 1.746622  | -0.351808 |
| C  | -1.375047 | 3.154846  | -0.691635 |
| C  | -3.760234 | 3.071439  | -1.133377 |
| H  | -4.148217 | 1.907247  | 0.648215  |
| C  | -2.657456 | 3.976942  | -0.614216 |
| H  | -1.170102 | 2.948440  | -1.763324 |
| H  | -3.595189 | 2.865051  | -2.210760 |
| H  | -4.767168 | 3.520622  | -1.044445 |
| H  | -2.567490 | 4.913369  | -1.197539 |
| H  | -2.880520 | 4.268259  | 0.431854  |
| P  | -1.856875 | 1.461990  | -0.022990 |
| P  | 0.381950  | -0.290118 | 1.713241  |
| Cu | -0.388556 | -0.295731 | -0.481338 |
| C  | 2.493824  | -1.469210 | -1.987716 |



|   |           |           |           |
|---|-----------|-----------|-----------|
| C | 0.477240  | -0.468294 | -2.687165 |
| C | 3.859733  | -1.341370 | -1.699703 |
| C | 1.786105  | -2.593150 | -1.492860 |
| C | -0.289082 | -1.504242 | -2.175981 |
| H | -0.000880 | 0.419226  | -3.124046 |
| C | 4.507112  | -2.260168 | -0.881636 |
| H | 4.417136  | -0.493497 | -2.103109 |
| C | 2.447377  | -3.471156 | -0.630598 |
| C | 0.377639  | -2.843778 | -1.997668 |
| H | -1.360460 | -1.501831 | -2.432178 |
| C | 3.795882  | -3.311878 | -0.311882 |
| H | 5.573677  | -2.127124 | -0.664664 |
| H | 1.904720  | -4.324938 | -0.209831 |
| H | 0.480240  | -3.298959 | -3.016120 |
| H | 4.289862  | -4.023221 | 0.360148  |
| N | 1.823628  | -0.455583 | -2.704158 |
| B | 2.574025  | 0.809219  | -3.285010 |
| F | 1.626818  | 1.617448  | -3.900650 |
| F | 3.532001  | 0.392063  | -4.192276 |
| F | 3.178448  | 1.521261  | -2.243793 |
| C | -0.468464 | -3.822402 | -1.180560 |
| H | -0.280721 | -3.663343 | -0.097675 |
| H | -1.536078 | -3.563080 | -1.336375 |
| C | -0.278528 | -5.284333 | -1.553336 |
| H | 0.774356  | -5.611023 | -1.468665 |
| H | -0.887527 | -5.948198 | -0.913000 |
| H | -0.585679 | -5.459953 | -2.601969 |
| C | -1.908175 | -1.687334 | 2.599267  |
| C | -2.639892 | -1.336139 | 3.738258  |

|   |           |           |           |
|---|-----------|-----------|-----------|
| C | -2.607882 | -1.938157 | 1.409003  |
| C | -4.030918 | -1.219280 | 3.681739  |
| H | -2.126443 | -1.149146 | 4.688835  |
| C | -3.992849 | -1.828927 | 1.350698  |
| H | -2.048414 | -2.234459 | 0.508878  |
| C | -4.711406 | -1.459045 | 2.489701  |
| H | -4.586585 | -0.941866 | 4.585133  |
| H | -4.516874 | -2.035842 | 0.410131  |
| H | -5.803468 | -1.368808 | 2.445941  |
| C | 3.270425  | -0.099346 | 2.149814  |
| C | 4.445307  | -0.494676 | 2.810277  |
| C | 3.398150  | 0.614129  | 0.955015  |
| C | 5.700591  | -0.167542 | 2.304761  |
| H | 4.383723  | -1.056649 | 3.749574  |
| C | 4.654977  | 0.947641  | 0.448295  |
| H | 2.505956  | 0.915378  | 0.387724  |
| C | 5.810688  | 0.564895  | 1.122320  |
| H | 6.601132  | -0.484806 | 2.844120  |
| H | 4.714310  | 1.488701  | -0.502640 |
| H | 6.797572  | 0.826636  | 0.722748  |
| C | -4.423608 | 0.623619  | -1.034594 |
| C | -3.866441 | -0.045396 | -2.131195 |
| C | -5.708067 | 0.262102  | -0.615990 |
| C | -4.558034 | -1.073044 | -2.769130 |
| H | -2.866532 | 0.242729  | -2.487680 |
| C | -6.411192 | -0.756106 | -1.258896 |
| H | -6.159743 | 0.783688  | 0.238605  |
| C | -5.833621 | -1.434707 | -2.331381 |
| H | -4.098891 | -1.592570 | -3.618805 |

|   |           |           |           |
|---|-----------|-----------|-----------|
| H | -7.415923 | -1.026799 | -0.913555 |
| H | -6.379500 | -2.242227 | -2.832580 |
| C | -0.120768 | 3.692396  | -0.073031 |
| C | -0.131849 | 4.553552  | 1.031141  |
| C | 1.115651  | 3.285642  | -0.592736 |
| C | 1.063399  | 4.981008  | 1.610750  |
| H | -1.082585 | 4.905395  | 1.449762  |
| C | 2.308259  | 3.716501  | -0.018941 |
| H | 1.152482  | 2.625430  | -1.471420 |
| C | 2.287434  | 4.560649  | 1.091907  |
| H | 1.034803  | 5.655618  | 2.474601  |
| H | 3.257102  | 3.383046  | -0.453764 |
| H | 3.225580  | 4.899545  | 1.546430  |
| C | -1.776387 | 1.614137  | 1.828895  |
| H | -2.570343 | 0.935376  | 2.201493  |
| H | -2.061332 | 2.637035  | 2.146050  |
| C | -0.431378 | 1.226792  | 2.437222  |
| H | 0.314067  | 2.034474  | 2.271057  |
| H | -0.530253 | 1.114757  | 3.535835  |

#### V-S<sub>3,4</sub>

|   |          |          |          |
|---|----------|----------|----------|
| C | 3.788853 | 0.543886 | 1.489032 |
| C | 2.042113 | 2.649776 | 1.747971 |
| C | 3.953979 | 1.459860 | 2.709295 |
| H | 4.509777 | 0.884137 | 0.717318 |
| C | 3.459489 | 2.835678 | 2.290251 |
| H | 1.376024 | 2.432184 | 2.607829 |
| H | 3.345912 | 1.071501 | 3.553148 |

|    |           |           |           |
|----|-----------|-----------|-----------|
| H  | 5.007061  | 1.468676  | 3.047851  |
| H  | 3.473703  | 3.566975  | 3.120634  |
| H  | 4.132544  | 3.228244  | 1.502313  |
| C  | -1.422479 | 1.047733  | -2.684702 |
| C  | 0.381713  | -1.013935 | -2.866846 |
| C  | -1.621117 | 0.011197  | -3.799897 |
| H  | -0.970115 | 1.953180  | -3.136856 |
| C  | -0.241605 | -0.521466 | -4.169851 |
| H  | -0.205862 | -1.884151 | -2.514651 |
| H  | -2.247249 | -0.824648 | -3.433858 |
| H  | -2.144421 | 0.468206  | -4.660626 |
| H  | -0.293342 | -1.335825 | -4.917796 |
| H  | 0.360063  | 0.293791  | -4.621352 |
| P  | -0.049440 | 0.322532  | -1.616159 |
| P  | 2.096307  | 1.005074  | 0.813501  |
| Cu | 0.116201  | -0.218210 | 0.643501  |
| C  | -0.926283 | -2.136179 | 1.251587  |
| C  | -3.277681 | -2.066990 | 1.047070  |
| C  | -0.889586 | -1.220967 | 2.281433  |
| C  | -3.362922 | -1.189435 | 2.152588  |
| C  | -2.140725 | -0.479216 | 2.694056  |
| H  | -2.207729 | -0.475855 | 3.803692  |
| N  | -2.035872 | -2.477607 | 0.543978  |
| B  | -1.885818 | -3.342544 | -0.752224 |
| F  | -0.527604 | -3.587093 | -0.952408 |
| F  | -2.390869 | -2.622121 | -1.843808 |
| F  | -2.566706 | -4.545143 | -0.635406 |
| C  | -2.049516 | 0.997067  | 2.261596  |
| H  | -1.059779 | 1.363167  | 2.614233  |

|   |           |           |           |
|---|-----------|-----------|-----------|
| H | -2.029435 | 1.034965  | 1.147155  |
| C | -3.133367 | 1.924252  | 2.778378  |
| H | -3.206417 | 1.879562  | 3.883067  |
| H | -2.919260 | 2.973670  | 2.498473  |
| H | -4.123953 | 1.671530  | 2.357699  |
| C | -4.613585 | -0.955156 | 2.733045  |
| C | -5.785032 | -1.489210 | 2.204637  |
| H | -6.752534 | -1.280589 | 2.675101  |
| C | -4.467379 | -2.583015 | 0.499433  |
| C | -5.702260 | -2.289168 | 1.064399  |
| H | -6.609994 | -2.712807 | 0.618093  |
| H | -4.661998 | -0.322005 | 3.628730  |
| H | -4.414107 | -3.249272 | -0.364897 |
| H | -0.042699 | -1.255259 | 2.979996  |
| H | -0.027665 | -2.726567 | 1.018004  |
| C | 1.839497  | -1.357429 | -2.799290 |
| C | 2.283966  | -2.159121 | -1.735282 |
| C | 2.788690  | -0.851394 | -3.693798 |
| C | 3.638446  | -2.415417 | -1.548022 |
| H | 1.539854  | -2.589140 | -1.051358 |
| C | 4.148693  | -1.112657 | -3.510518 |
| H | 2.472219  | -0.239438 | -4.547359 |
| C | 4.580036  | -1.883213 | -2.432088 |
| H | 3.963358  | -3.036128 | -0.703757 |
| H | 4.877829  | -0.705878 | -4.221290 |
| H | 5.648682  | -2.081007 | -2.284673 |
| C | -2.633522 | 1.461125  | -1.901237 |
| C | -2.922146 | 2.818419  | -1.718677 |
| C | -3.472587 | 0.510989  | -1.303099 |

|   |           |           |           |
|---|-----------|-----------|-----------|
| C | -4.027521 | 3.221889  | -0.968409 |
| H | -2.269879 | 3.572796  | -2.180259 |
| C | -4.579560 | 0.911613  | -0.558230 |
| H | -3.248998 | -0.559990 | -1.406592 |
| C | -4.863201 | 2.268056  | -0.390220 |
| H | -4.239734 | 4.290887  | -0.842573 |
| H | -5.219127 | 0.149484  | -0.093754 |
| H | -5.734367 | 2.580669  | 0.197900  |
| C | 4.025767  | -0.917096 | 1.746878  |
| C | 5.247243  | -1.497983 | 1.388364  |
| C | 3.067244  | -1.719234 | 2.377841  |
| C | 5.503670  | -2.844168 | 1.646107  |
| H | 6.008811  | -0.882675 | 0.890453  |
| C | 3.312495  | -3.068096 | 2.626190  |
| H | 2.104104  | -1.277532 | 2.667025  |
| C | 4.533949  | -3.635712 | 2.260278  |
| H | 6.466855  | -3.280228 | 1.356148  |
| H | 2.542974  | -3.680621 | 3.110699  |
| H | 4.728834  | -4.696548 | 2.454817  |
| C | 1.420086  | 3.755451  | 0.943627  |
| C | 2.175690  | 4.676181  | 0.207814  |
| C | 0.021634  | 3.848223  | 0.881636  |
| C | 1.551412  | 5.650450  | -0.572691 |
| H | 3.271269  | 4.645418  | 0.239430  |
| C | -0.604131 | 4.822472  | 0.109166  |
| H | -0.586873 | 3.135246  | 1.453731  |
| C | 0.161027  | 5.727677  | -0.627746 |
| H | 2.163650  | 6.361570  | -1.139362 |
| H | -1.699449 | 4.873576  | 0.085444  |

|   |           |          |           |
|---|-----------|----------|-----------|
| H | -0.326149 | 6.497831 | -1.236571 |
| C | 1.260708  | 1.634683 | -1.815723 |
| H | 1.543899  | 1.726376 | -2.883343 |
| H | 0.751498  | 2.582809 | -1.539370 |
| C | 2.496162  | 1.425160 | -0.949564 |
| H | 3.160667  | 2.311423 | -0.989282 |
| H | 3.087380  | 0.563994 | -1.323878 |

### IIIa

|   |           |           |           |
|---|-----------|-----------|-----------|
| C | 0.669612  | -1.647452 | -0.793722 |
| C | 0.065235  | 0.547364  | -0.158102 |
| C | -0.591653 | -1.996605 | -1.109670 |
| C | -1.289465 | 0.263597  | -0.469622 |
| C | -1.745227 | -1.170095 | -0.620573 |
| H | -2.586980 | -1.199265 | -1.348310 |
| N | 1.025429  | -0.457096 | -0.187959 |
| B | 2.501684  | -0.211970 | 0.244571  |
| F | 3.190755  | -1.421322 | 0.180498  |
| F | 2.534956  | 0.278390  | 1.552518  |
| F | 3.123965  | 0.714508  | -0.601512 |
| C | -2.283357 | -1.749906 | 0.704035  |
| H | -2.449836 | -2.836747 | 0.549350  |
| H | -1.476846 | -1.672249 | 1.463478  |
| C | -3.556570 | -1.106464 | 1.221247  |
| H | -4.364438 | -1.153456 | 0.463608  |
| H | -3.924357 | -1.614495 | 2.132257  |
| H | -3.403975 | -0.040439 | 1.474962  |
| C | -2.204210 | 1.315679  | -0.565084 |

|   |           |           |           |
|---|-----------|-----------|-----------|
| C | -1.842699 | 2.636556  | -0.309131 |
| H | -2.582153 | 3.442587  | -0.383915 |
| C | 0.418444  | 1.885191  | 0.118052  |
| C | -0.521269 | 2.906499  | 0.051699  |
| H | -0.207896 | 3.935729  | 0.268387  |
| H | -3.241588 | 1.077216  | -0.839934 |
| H | 1.456266  | 2.121634  | 0.364269  |
| H | -0.780867 | -2.950117 | -1.618647 |
| H | 1.516118  | -2.301235 | -1.030948 |

### IIIb

|   |           |           |           |
|---|-----------|-----------|-----------|
| C | -3.396185 | -0.327323 | -1.745024 |
| C | -1.542901 | 1.422050  | -2.752925 |
| C | -3.408846 | -0.055712 | -3.257506 |
| H | -4.205423 | 0.280888  | -1.289702 |
| C | -2.893864 | 1.360007  | -3.461246 |
| H | -0.835679 | 0.781308  | -3.318304 |
| H | -2.739115 | -0.781678 | -3.765081 |
| H | -4.424034 | -0.209745 | -3.670383 |
| H | -2.799206 | 1.631223  | -4.530278 |
| H | -3.611705 | 2.072694  | -3.007231 |
| C | 1.175081  | 1.898274  | 2.543845  |
| C | -0.939215 | 0.298057  | 3.231095  |
| C | 1.017163  | 1.496958  | 4.013086  |
| H | 0.871921  | 2.960877  | 2.434496  |
| C | -0.469160 | 1.297514  | 4.282524  |
| H | -0.409068 | -0.659326 | 3.417497  |
| H | 1.537034  | 0.534760  | 4.196536  |



|    |           |           |           |
|----|-----------|-----------|-----------|
| H  | 1.477761  | 2.245269  | 4.685233  |
| H  | -0.665212 | 0.930809  | 5.308497  |
| H  | -1.000445 | 2.265256  | 4.176245  |
| P  | -0.158514 | 0.915892  | 1.633279  |
| P  | -1.791129 | 0.452512  | -1.149695 |
| Cu | 0.096249  | -0.441700 | -0.185958 |
| C  | 1.585700  | -1.860562 | -2.195385 |
| C  | 2.527304  | -2.038564 | -0.060986 |
| C  | 2.682191  | -2.342755 | -2.823032 |
| C  | 3.731432  | -2.552553 | -0.614144 |
| C  | 3.996667  | -2.394572 | -2.095568 |
| H  | 4.606371  | -3.259947 | -2.442110 |
| N  | 1.492032  | -1.577293 | -0.850872 |
| C  | 4.817363  | -1.124465 | -2.402914 |
| H  | 4.839688  | -0.998350 | -3.506103 |
| H  | 4.250800  | -0.254261 | -2.006927 |
| C  | 6.233535  | -1.118569 | -1.858344 |
| H  | 6.805937  | -1.997363 | -2.217929 |
| H  | 6.784061  | -0.211604 | -2.173909 |
| H  | 6.246114  | -1.145598 | -0.751653 |
| C  | 4.680489  | -3.129930 | 0.233366  |
| C  | 4.514094  | -3.173246 | 1.617886  |
| H  | 5.279422  | -3.628206 | 2.257793  |
| C  | 2.378456  | -2.079479 | 1.343742  |
| C  | 3.352684  | -2.623517 | 2.168816  |
| H  | 3.195279  | -2.636931 | 3.255471  |
| H  | 5.590425  | -3.552224 | -0.217386 |
| H  | 1.444482  | -1.686064 | 1.771049  |
| H  | 2.645749  | -2.571581 | -3.896253 |

|   |           |           |           |
|---|-----------|-----------|-----------|
| H | 0.654058  | -1.695117 | -2.763410 |
| C | -2.395855 | -0.005243 | 3.058928  |
| C | -2.756429 | -1.178472 | 2.378254  |
| C | -3.410819 | 0.859787  | 3.481300  |
| C | -4.088679 | -1.467899 | 2.101426  |
| H | -1.968342 | -1.873357 | 2.052600  |
| C | -4.749115 | 0.571243  | 3.205633  |
| H | -3.160880 | 1.775579  | 4.030848  |
| C | -5.092507 | -0.585685 | 2.507825  |
| H | -4.345224 | -2.387309 | 1.560832  |
| H | -5.531438 | 1.261447  | 3.542719  |
| H | -6.143737 | -0.808165 | 2.289778  |
| C | 2.525913  | 1.714348  | 1.902419  |
| C | 2.682225  | 2.089065  | 0.559464  |
| C | 3.625449  | 1.162050  | 2.563840  |
| C | 3.887461  | 1.903611  | -0.107529 |
| H | 1.832028  | 2.537651  | 0.025807  |
| C | 4.840934  | 0.977816  | 1.899417  |
| H | 3.547174  | 0.863792  | 3.615726  |
| C | 4.976479  | 1.339705  | 0.562247  |
| H | 3.980055  | 2.201116  | -1.160059 |
| H | 5.688161  | 0.536248  | 2.437521  |
| H | 5.928293  | 1.187625  | 0.039815  |
| C | -3.629679 | -1.770518 | -1.386312 |
| C | -4.945845 | -2.217083 | -1.211412 |
| C | -2.590938 | -2.703009 | -1.280287 |
| C | -5.220525 | -3.554102 | -0.931576 |
| H | -5.770522 | -1.495111 | -1.290786 |
| C | -2.860969 | -4.040613 | -0.991668 |

|   |           |           |           |
|---|-----------|-----------|-----------|
| H | -1.547737 | -2.376248 | -1.397931 |
| C | -4.175715 | -4.471474 | -0.816387 |
| H | -6.258212 | -3.881101 | -0.796066 |
| H | -2.031817 | -4.752063 | -0.902258 |
| H | -4.386268 | -5.522990 | -0.589352 |
| C | -0.887988 | 2.751833  | -2.530058 |
| C | -1.617745 | 3.939173  | -2.391221 |
| C | 0.508669  | 2.813140  | -2.409985 |
| C | -0.973074 | 5.147698  | -2.125920 |
| H | -2.709251 | 3.931268  | -2.497079 |
| C | 1.154356  | 4.019648  | -2.149561 |
| H | 1.097986  | 1.890509  | -2.522941 |
| C | 0.414132  | 5.193142  | -1.999932 |
| H | -1.564562 | 6.064841  | -2.022328 |
| H | 2.247750  | 4.045485  | -2.064274 |
| H | 0.920424  | 6.143360  | -1.795557 |
| C | -1.315306 | 2.239210  | 1.006721  |
| H | -1.751419 | 2.816164  | 1.846677  |
| H | -0.672616 | 2.944511  | 0.437380  |
| C | -2.414426 | 1.683623  | 0.103316  |
| H | -2.964462 | 2.504938  | -0.397584 |
| H | -3.157343 | 1.125378  | 0.708109  |

## 11. References

- (1) (a) He, S.-J.; Wang, B.; Lu, X.; Gong, T.-J.; Yang, Y.-N.; Wang, X.-X.; Wang, Y.; Xiao B.; Fu, Y. Copper-catalyzed reagent-controlled regioselective cyanoborylation of vinylarenes. *Org. Lett.* **2018**, *20*, 5208–5212. (b) Karim, M.; Jahng, Y. Unusual product distribution from Friedländer reaction of di and triacetylbenzenes with 3-aminonaphthalene-2-carbaldehyde and properties of new benzo[g]quinoline-derived aza-aromatics. *Molecules* **2014**, *19*, 12842–12851.
- (2) Kohn, W.; Sham, L. J. Self-consistent equations including exchange and correlation effects. *Phys. Rev. A* **1965**, *140*, 1133–1138.
- (3) Zhao, Y.; Truhlar, D. G. The M06 suite of density functionals for main group thermochemistry, thermochemical kinetics, noncovalent interactions, excited states, and transition elements: Two new functionals and systematic testing of four M06-class functionals and 12 other functionals. *Theor. Chem. Acc.* **2008**, *120*, 215–241.
- (4) Weigend, F.; Ahlrichs, R. Balanced basis sets of split valence, triple zeta valence and quadruple zeta valence quality for H to Rn: Design and assessment of accuracy. *Phys. Chem. Chem. Phys.* **2005**, *7*, 3297–3305.
- (5) Tomasi, J.; Mennucci, B.; Cammi, R. Quantum mechanical continuum solvation models. *Chem. Rev.* **2005**, *105*, 2999–3093.
- (6) Gaussian 09, Revision A02, Frisch, M. J.; Trucks, G. W.; Schlegel, H. B.; Scuseria, G. E.; Robb, M. A.; Cheeseman, J. R.; Scalmani, G.; Barone, V.; Petersson, G. A.; Nakatsuji, H.; Li, X.; Caricato, M.; Marenich, A. V.; Bloino, J.; Janesko, B. G.; Gomperts, R.; Mennucci, B.; Hratchian, H. P.; Ortiz, J. V.; Izmaylov, A. F.; Sonnenberg, J. L.; Williams-Young, D.; Ding, F.; Lipparini, F.; Egidi, F.; Goings, J.; Peng, B.; Petrone, A.; Henderson, T.; Ranasinghe, D.; Zakrzewski, V. G.; Gao, J.; Rega, N.; Zheng, G.; Liang, W.; Hada, M.; Ehara, M.; Toyota, K.; Fukuda, R.; Hasegawa, J.; Ishida, M.; Nakajima, T.; Honda, Y.; Kitao, O.; Nakai, H.; Vreven, T.; Throssell, K.; Montgomery, J. A., Jr.; Peralta, J. E.; Ogliaro, F.; Bearpark, M. J.; Heyd, J. J.; Brothers, E. N.; Kudin, K. N.; Staroverov, V. N.; Keith, T. A.; Kobayashi, R.; Normand, J.; Raghavachari, K.; Rendell, A. P.; Burant, J. C.; Iyengar, S. S.; Tomasi, J.; Cossi, M.; Millam, J. M.; Klene, M.; Adamo, C.; Cammi, R.; Ochterski, J. W.; Martin, R. L.; Morokuma, K.; Farkas, O.; Foresman, J. B.; Fox, D. J. Gaussian, Inc., Wallingford CT, 2009.
- (7) (a) Schlegel, H. B.; McDouall, J. J. W. Do You Have SCF Stability and Convergence Problems? in *Computational Advances in Organic Chemistry: Molecular Structure and Reactivity* **1991**, *94*, 167–185. (b) Bauernschmitt, R.; Ahlrichs, R. Stability analysis for solutions of the closed shell Kohn-Sham equation. *J. Chem. Phys.* **1996**, *104*, 9047–9052.
- (8) (a) González, C.; Schlegel, H. B. Reaction path following in mass-weighted internal coordinates. *J. Phys. Chem.* **1990**, *94*, 5523–5527. (b) Fukui, K. The path of chemical reactions – the IRC approach. *Acc. Chem. Res.* **1981**, *14*, 363–368. (c) Maeda, S.; Harabuchi, Y.; Ono, Y.; Taketsugu T.; Morokuma, K. Intrinsic reaction coordinate: Calculation, bifurcation, and automated search. *Int. J. Quantum Chem.* **2015**, *115*, 258–269.
- (9) (a) Seeger, R.; Pople, J. A. Self-consistent molecular orbital methods. XVIII. Constraints and stability in Hartree–Fock theory. *J. Chem. Phys.* **1977**, *66*, 3045–3050. (b) Bauernschmitt, R.; Ahlrichs, R. Stability analysis for solutions of the closed shell Kohn-Sham equation. *J. Chem. Phys.* **1996**, *104*, 9047–9052.
- (10) Schaftenaar, G.; Noordik, J. Molden: a pre- and postprocessing program for molecular and electronic structures, *J. Comput.-Aided Mol. Des.* **2000**, *14*, 123–134.
- (11) CYLview, 1.0b; Legault, C. Y., Université de Sherbrooke, 2009 (<http://www.cylview.org>).

- (12) Peltzer, R. M.; Eisenstein, O.; Nova, A.; Cascella, M. How Solvent Dynamics Controls the Schlenk Equilibrium of Grignard Reagents: A Computational Study of CH<sub>3</sub>MgCl in Tetrahydrofuran. *J. Phys. Chem. B* **2017**, *121*, 4226–4237.
- (13) Mani, N. S.; Wu, M. An efficient synthetic route to chiral 4-alkyl-1,2,3,4-tetrahydroquinolines: enantioselective synthesis of (*R*)-4-ethyl-1,2,3,4-tetrahydroquinoline. *Tetrahedron: Asymmetry* **2000**, *11*, 4687–4691.
- (14) Wang, D.; Wang, Z.; Liu, Z.; Huang, M.; Hu, J.; Yu, P. Strategic C–C bond-forming dearomatization of pyridines and quinolines. *Org. Lett.* **2019**, *21*, 4459–4463.
- (15) Bruker, (2016). APEX3 (v2016.1-0), SAINT (Version 8.18C) and SADABS (Version 2012/1). Bruker AXS Inc., Madison, Wisconsin, USA.
- (16) Sheldrick, G. M. Crystal structure refinement with *SHELXL*. *Acta Cryst. C* **2015**, *71*, 3–8.
- (17) Sheldrick, G. M. A short history of *SHELX*. *Acta Cryst. A* **2008**, *64*, 112–122.
